# Supplementary material for: A recyclable ciprofloxacin polymer ligand for copper-catalyzed coupling of (hetero)aryl halide aminations
Source: Royal Society of Chemistry journal article supplement (doi:10.1039/d2nj03440a), 2022-01-01

## Electronic Supporting Information (ESI) for New Journal

### Chemistry

#### **A Recyclable Ciprofloxacin Polymer Ligand for Copper-Catalyzed Coupling of (Hetero)aryl halides Aminations**

Dake Song,<sup>a</sup> Yi Qin,<sup>a</sup> Ying Liu,<sup>a</sup> Jifan Wang,<sup>a</sup> Haijie Yang,<sup>a</sup> Zhonghui Zheng,<sup>b</sup> Feng Xu,<sup>a</sup> Xuefei Bao<sup>\*a</sup> and Guoliang Chen<sup>\*a</sup>

a. Key Laboratory of Structure-Based Drug Design & Discovery of Ministry of Education, Shenyang Pharmaceutical University, Shenyang 110016, Liaoning, P. R. of China.

b. Shandong Xinhua Pharmaceutical Co, Ltd, Zibo 255086, Shandong, P. R. of China

## Table of Contents

|                                                                                                                                        |    |
|----------------------------------------------------------------------------------------------------------------------------------------|----|
| Table of Contents .....                                                                                                                | 2  |
| 1. General information .....                                                                                                           | 3  |
| 2. Synthesis of ciprofloxacin polymer ligand <b>L9</b> .....                                                                           | 3  |
| 2.1 General procedure for the preparation ciprofloxacin polymer ligand <b>L9</b> .....                                                 | 3  |
| 2.2 Fourier transform infrared (FTIR) spectra of ligand <b>L9</b> .....                                                                | 4  |
| 2.3 Determination of ciprofloxacin in reaction wastewater by high performance liquid chromatography (HPLC) .....                       | 5  |
| 3. General procedure for amination .....                                                                                               | 6  |
| 3.1 General procedure for the Cu <sub>2</sub> O-catalyzed coupling of (hetero)aryl bromides with nitrogen aromatic heterocycles .....  | 6  |
| 3.2 General procedure for the Cu <sub>2</sub> O-catalyzed coupling of (hetero)aryl bromides with cyclic secondary amines .....         | 6  |
| 3.3 General procedure for scaled-up coupling reactions of aryl bromides with piperazine .....                                          | 6  |
| 3.4 General procedure for the Cu <sub>2</sub> O-catalyzed coupling of (hetero)aryl bromides and chlorides with ammonia solution .....  | 7  |
| 3.5 General procedure for the Cu <sub>2</sub> O-catalyzed coupling of (hetero)aryl chlorides with primary and secondary alkylamines .. | 8  |
| 3.6 Preparation of 4-ethyl- <i>N</i> -isobutylaniline ( <b>8k</b> ) .....                                                              | 8  |
| 3.6.1 Optimization of additive and solvent .....                                                                                       | 8  |
| 3.6.2 Procedure for 4-ethyl- <i>N</i> -isobutylaniline ( <b>8k</b> ) .....                                                             | 9  |
| 4. A possible reaction mechanism .....                                                                                                 | 9  |
| 5. Characterization .....                                                                                                              | 9  |
| 6. References .....                                                                                                                    | 22 |
| 7. Copies of <sup>1</sup> H and <sup>13</sup> C NMR spectrum of products .....                                                         | 24 |

## 1. General information

Unless otherwise noted, all chemical reagents and solvents were obtained from commercial sources and were used without further purification. Chloromethyl Polystyrene Resin cross-linked with 1 % DVB (100-200 mesh, 1-1.24 mmol/g). TLC was performed on silicagel 60 GF254 and monitored under UV light. Melting points (m.p) were measured with Hanon MP420 melting point apparatus and was uncorrected. Column chromatography was performed on 200-400 mesh silica gel under pressure. NMR spectra were obtained on a Bruker AVIII-HD-400 and 600 spectrometer ( $^1\text{H}$  and  $^{13}\text{C}$ ), TMS as internal standard and chemical shifts ( $\delta$ ) were given ppm. The following abbreviations were applied in reporting NMR data: s (singlet), d (doublet), t (triplet), q (quartet), dd (doublet of doublets), dt (doublets of triplet), td (triplets of doublet) and m (multiplet). The mass spectral data were obtained on Waters ACQUITY QDa Mass Detector. HPLC analyses was performed on Shimadzu LC-2010AHT HPLC. The infrared spectral data were measured on FTIR-650 Fourier transform infrared spectrometer.

## 2. Synthesis of ciprofloxacin polymer ligand L9

### 2.1 General procedure for the preparation ciprofloxacin polymer ligand L9

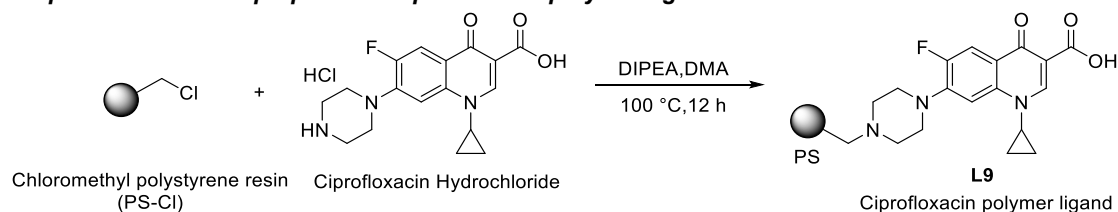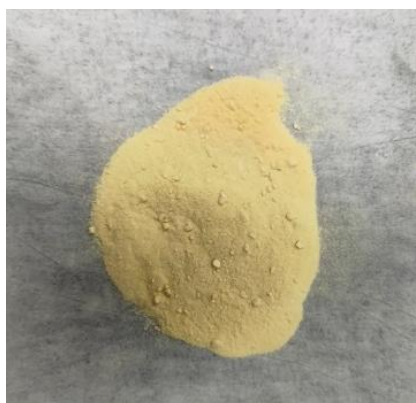

Figure S1. Synthesis of L9

Chloromethyl polystyrene resin 5.000 g (5-6.20 mmol  $-\text{Cl}$ ) swelled in 120 mL DMA for 12 h. Then ciprofloxacin hydrochloride (11.402 g, 9.30 mmol), DIPEA (8.013 g, 4.65 mmol) were added to the mixture. The mixture was stirred at 100 °C in an oil bath for 12 h. After cooling to room temperature, the mixture was filtered, and the filter cake was washed with deionized water, acetonitrile and ethanol, and then dried under vacuum to give ligand L9 (6.350 g) as a yellow solid. The filtrate was added 100 mL water and filtered to recover the excess ciprofloxacin.

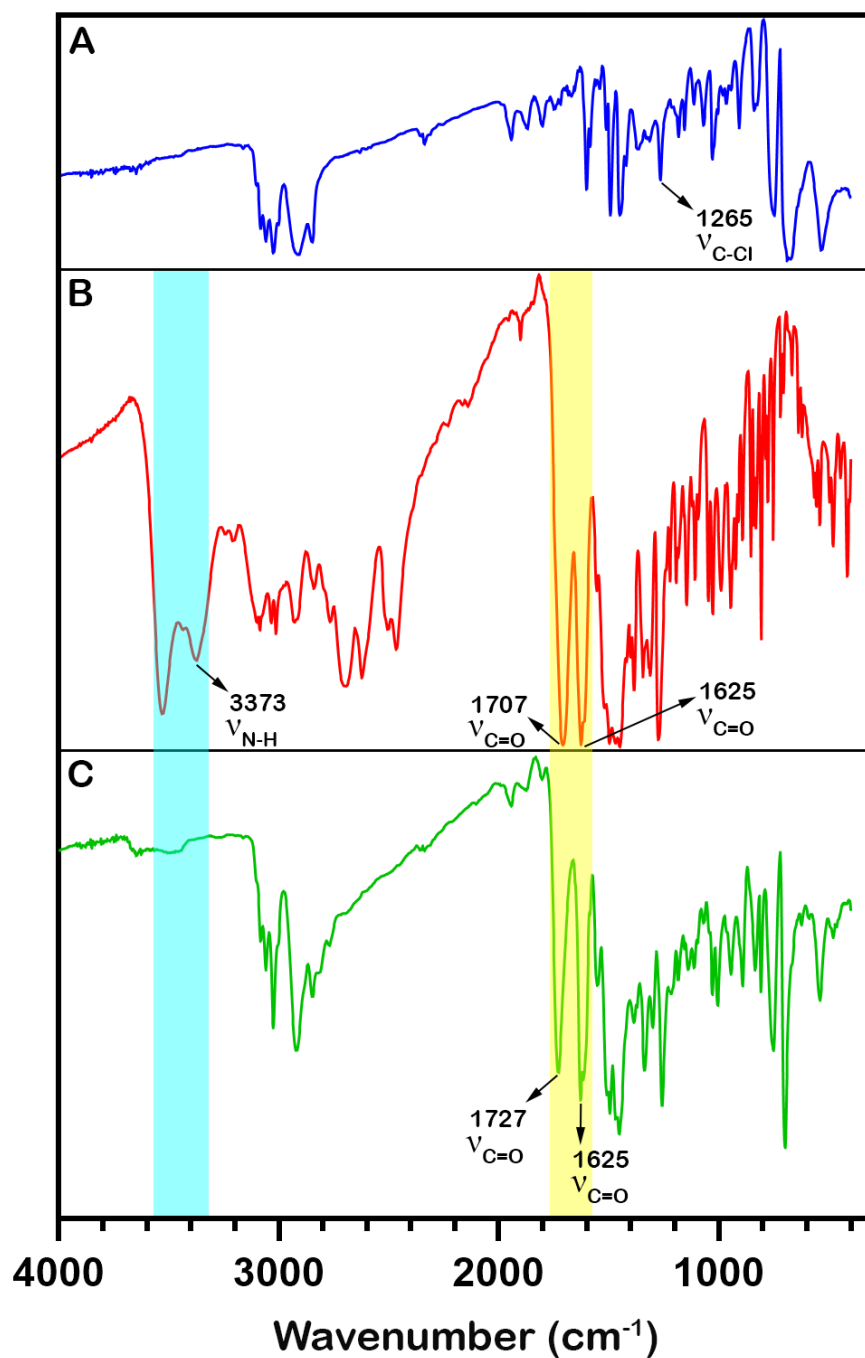

Figure S2. FTIR spectra of A (Chloromethyl polystyrene resin), B (Ciprofloxacin hydrochloride) and C (Ligand L9)

## 2.2 Fourier transform infrared (FTIR) spectra of ligand L9

Compared with the FTIR spectrum of ciprofloxacin hydrochloride, the most significant change in the infrared spectrum of **L9** was the disappearance of the N-H stretching vibration peak at  $3373\text{ cm}^{-1}$  of ciprofloxacin hydrochloride, indicating that hydrogen on piperazine was replaced. The strong absorption peaks at  $1727\text{ cm}^{-1}$  and  $1625\text{ cm}^{-1}$  in the FTIR spectrum of **L9** correspond to the stretching vibration peaks of the carbonyl in the carboxyl group and ketone carbonyl group, respectively. (Figure S2)

### 2.3 Determination of ciprofloxacin in reaction wastewater by high performance liquid chromatography (HPLC)

**A:** HPLC conditions: Agilent ZORBAX Extend-C18, 4.6×150 mm, 5 μm, 10 % acetonitrile/90 % H<sub>2</sub>O eluent, 0.5 mL/min, 254 nm.

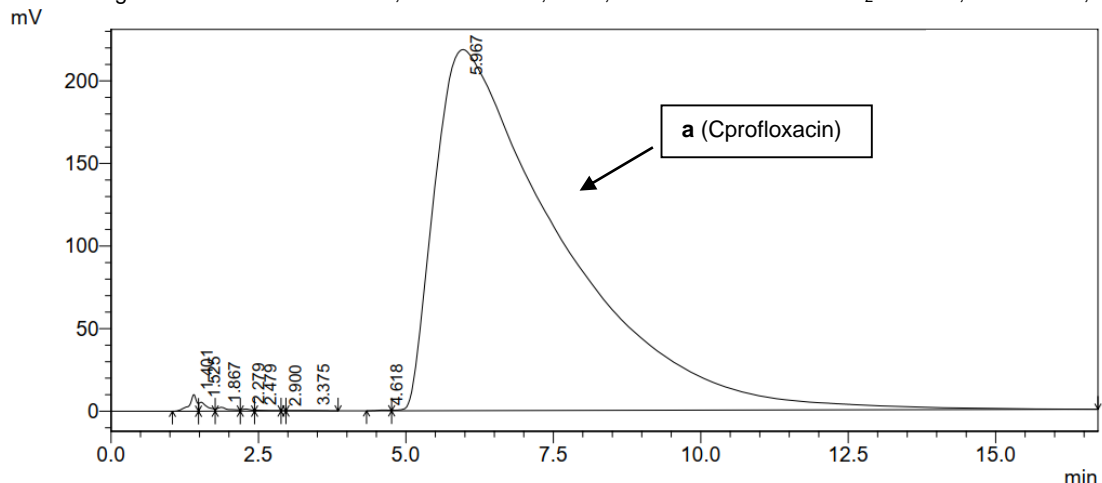

| Peak# | Ret.Time | Height | Area % |
|-------|----------|--------|--------|
| 1     | 1.401    | 10017  | 0.264  |
| 2     | 1.525    | 5390   | 0.161  |
| 3     | 1.867    | 2311   | 0.101  |
| 4     | 2.279    | 1237   | 0.040  |
| 5     | 2.479    | 549    | 0.031  |
| 6     | 2.900    | 235    | 0.003  |
| 7     | 3.375    | 301    | 0.032  |
| 8     | 4.618    | 420    | 0.019  |
| 9     | 5.967    | 218623 | 99.349 |

**B:** HPLC conditions: Agilent ZORBAX Extend-C18, 4.6×150 mm, 5 μm, 10 % acetonitrile/90 % H<sub>2</sub>O eluent, 0.5 mL/min, 254 nm.

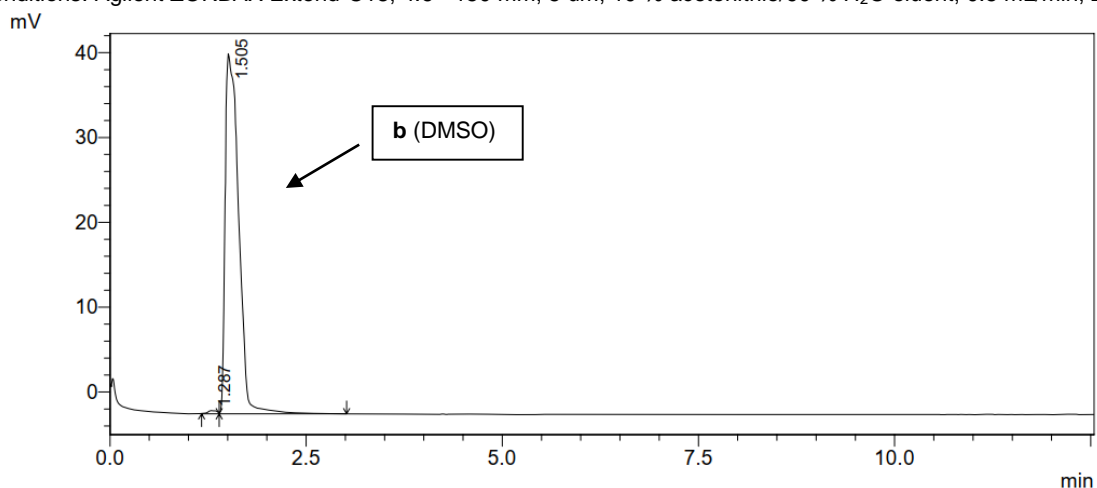

| Peak# | Ret.Time | Height | Area % |
|-------|----------|--------|--------|
| 1     | 1.287    | 378    | 0.614  |
| 2     | 1.505    | 42449  | 99.386 |

**Figure S3** HPLC of reaction wastewater. Reaction conditions: **(A)** 4-Bromotoluene (3 mmol), pyrazole (3.75 mmol), Cu<sub>2</sub>O (0.3 mmol), **L4** (0.47 g, 0.3 mmol), Cs<sub>2</sub>CO<sub>3</sub> (6 mmol) and 6 mL 50 % DMSO aqueous; **(B)** 4-Bromotoluene (3 mmol), pyrazole (3.75 mmol), Cu<sub>2</sub>O (0.3 mmol), **L9** (0.47 g, 0.3 mmol), Cs<sub>2</sub>CO<sub>3</sub> (6 mmol) and 6 mL 50 % DMSO aqueous,

### 3. General procedure for amination

#### 3.1 General procedure for the Cu<sub>2</sub>O-catalyzed coupling of (hetero)aryl bromides with nitrogen aromatic heterocycles

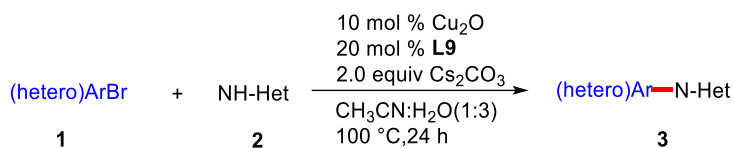

A 10 mL of seal tube with a magnetic stirring bar was charged with aryl bromides (3 mmol), amines (3.75 mmol), Cu<sub>2</sub>O (0.04 g, 0.3 mmol), ligand **L9** (0.47 g, 0.3 mmol), Cs<sub>2</sub>CO<sub>3</sub> (1.95 g, 6 mmol), 1 mL CH<sub>3</sub>CN and 3 mL H<sub>2</sub>O. The mixture was stirred at 100 °C in an oil bath for 24 h. The reaction mixture was cooled to ambient temperature, suction filtration to recover the ligand **L9**. The filtrate was diluted by 20 mL water and extracted with ethyl acetate (3×30 mL). The combined extracts was wash with brine and dried with MgSO<sub>4</sub>. Filtered and evaporated under vacuum to give the crude product, which was purified with column chromatography on silica gel and eluting with petroleum ether /ethyl acetate or dichloromethane/methanol to give pure desired products.

#### 3.2 General procedure for the Cu<sub>2</sub>O-catalyzed coupling of (hetero)aryl bromides with cyclic secondary amines

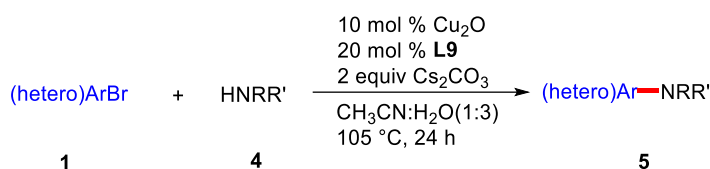

To a 50 mL seal tube with a magnetic stirring bar was charged with aryl bromides (3 mmol), amines (3.75 mmol), Cu<sub>2</sub>O (0.04 g, 0.3 mmol), ligand **L9** (0.47 g, 0.3 mmol), Cs<sub>2</sub>CO<sub>3</sub> (1.95 g, 6 mmol), 1 mL CH<sub>3</sub>CN and 3 mL H<sub>2</sub>O. The mixture was stirred at 105 °C in an oil bath for 24 h. After cooling to room temperature, the mixture was filtered to recover the ligand **L9**. The filtrate was diluted by 20 mL water and extracted with ethyl acetate (3×30 mL). The combined extracts was wash with brine and dried with MgSO<sub>4</sub>. Filtered and evaporated under vacuum to give the crude product, which was purified with column chromatography on silica gel and eluting with petroleum ether /ethyl acetate or dichloromethane/methanol to give pure desired products.

#### 3.3 General procedure for scaled-up coupling reactions of aryl bromides with piperazine

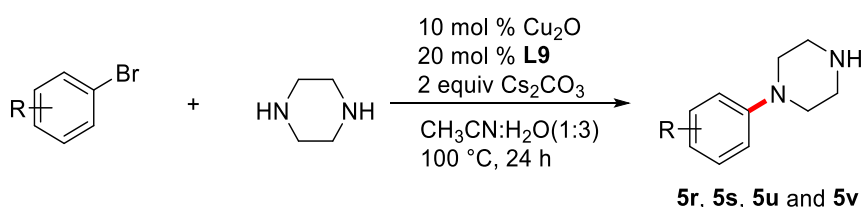

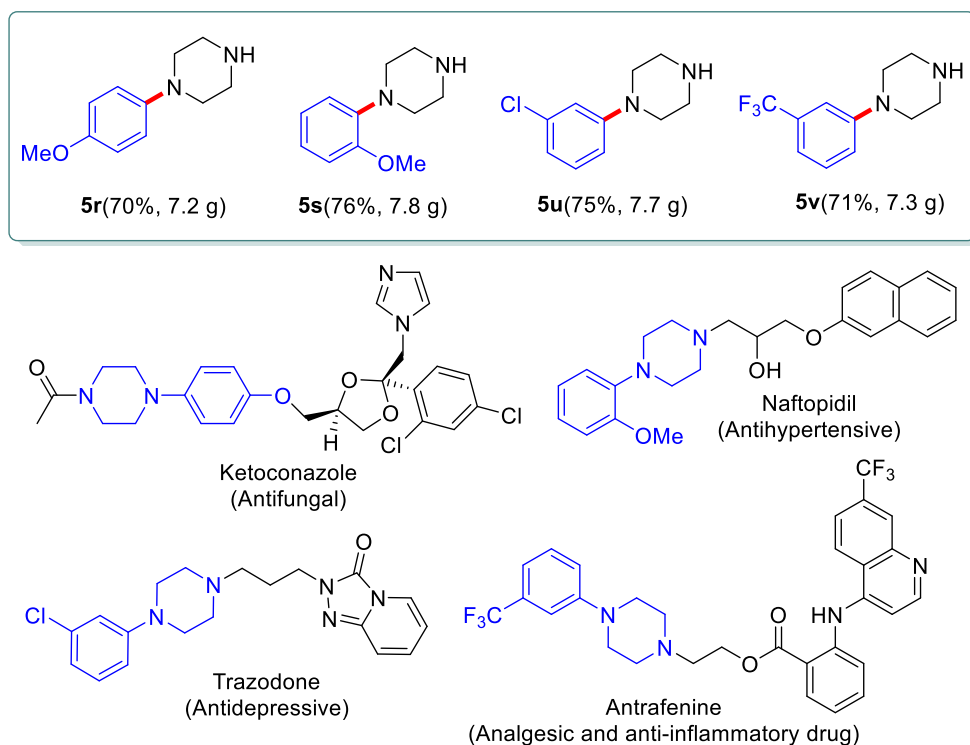

**Figure S4** Scaled-up coupling reactions of aryl bromides with piperazine

To a 100 mL flask with a magnetic stirring bar was charged with aryl bromides (10 g, 1 eq), piperazine (4 eq), Cu<sub>2</sub>O (0.1 eq), ligand **L9** (0.2 eq), Cs<sub>2</sub>CO<sub>3</sub> (2 eq), 10 mL CH<sub>3</sub>CN and 30 mL H<sub>2</sub>O. The mixture was stirred at 100 °C in an oil bath for 24 h under argon. After cooling to room temperature, the mixture was filtered to recover the ligand **L9**. Recovery of acetonitrile from filtrate under reduced pressure and the residue was extracted with ethyl acetate (3×30 mL). The combined extracts was wash with brine and dried with MgSO<sub>4</sub>. Filtered and evaporated under vacuum to give the crude product, which was purified with column chromatography on silica gel and eluting with petroleum ether /ethyl acetate or dichloromethane/methanol to give pure desired products (**5r**, **5s**, **5u** and **5v**).

### 3.4 General procedure for the Cu<sub>2</sub>O-catalyzed coupling of (hetero)aryl bromides and chlorides with ammonia solution

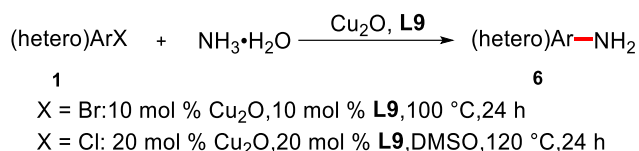

**For aryl bromides:** A 30 mL of seal tube with a magnetic stirring bar was charged with aryl bromides (3 mmol), 25 % ammonia aqueous solution (3 mL), Cu<sub>2</sub>O (0.04 g, 0.3 mmol) and ligand **L9** (0.47 g, 0.3 mmol). The resulting solution was stirred at 100 °C in an oil bath for 24 h. The reaction mixture was cooled to ambient temperature, suction filtration to recover the ligand **L9**. The filtrate was diluted by 20 mL water and extracted with ethyl acetate (3×30 mL). The combined extracts was dried over MgSO<sub>4</sub>, filtered and evaporated under vacuum to give the crude product, which was purified with petroleum ether /ethyl acetate or dichloromethane/methanol to give pure desired products.

**For aryl chlorides:** A 30 mL of seal tube with a magnetic stirring bar was charged with aryl bromides (3 mmol), 25 % ammonia aqueous solution (3 mL), Cu<sub>2</sub>O (0.08 g, 0.6 mmol), ligand **L9** (0.94 g, 0.6 mmol) and 3 mL DMSO. The resulting solution was stirred at 120 °C in an oil bath for 24 h. The reaction mixture was cooled to ambient temperature, suction filtration to recover the ligand **L9**. The filtrate was diluted by 20 mL water and extracted with ethyl acetate (3×30 mL). The combined extracts was dried over MgSO<sub>4</sub>, filtered and evaporated under vacuum to give the crude product, which was purified with petroleum ether /ethyl acetate or dichloromethane/methanol to give pure desired products.

### 3.5 General procedure for the Cu<sub>2</sub>O-catalyzed coupling of (hetero)aryl chlorides with primary and secondary alkylamines

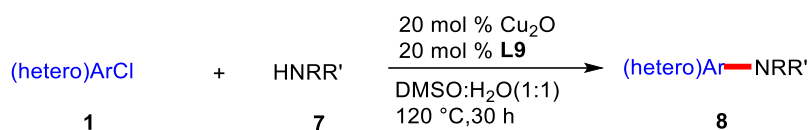

A 30 mL of seal tube with a magnetic stirring bar was charged with aryl chlorides (3 mmol), amines (24 mmol), Cu<sub>2</sub>O (0.08 g, 0.6 mmol), ligand **L9** (0.94 g, 0.6 mmol), 1 mL DMSO and 3 mL H<sub>2</sub>O. The resulting solution was stirred at 120 °C in an oil bath for 30 h. The reaction mixture was cooled to ambient temperature, suction filtration to recover the ligand **L9**. The filtrate was diluted by 0 mL water and extracted with ethyl acetate (3×30 mL). The combined extracts was dried over MgSO<sub>4</sub>, filtered and evaporated under vacuum to give the crude product, which was purified with column chromatography on silica gel and eluting with petroleum ether /ethyl acetate or dichloromethane/methanol to give pure desired products.

### 3.6 Preparation of 4-ethyl-N-isobutylaniline (**8k**)

#### 3.6.1 Optimization of additive and solvent

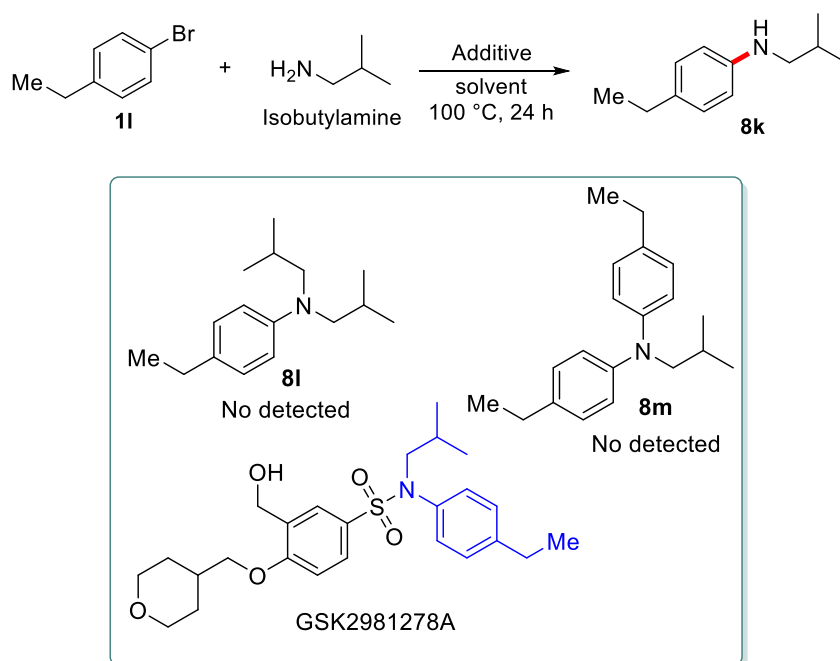

**Table S1.** Optimization of additive and solvent

| Entry | Additive                                           | Solvent                                         | Yield (%) <sup>[a, b]</sup> |
|-------|----------------------------------------------------|-------------------------------------------------|-----------------------------|
| 1     | 10 mol % Cu <sub>2</sub> O                         | CH <sub>3</sub> CN/H <sub>2</sub> O (v/v = 1:3) | 36                          |
| 2     | 10 mol % Cu <sub>2</sub> O + 20 mol % <b>PS-Cl</b> | CH <sub>3</sub> CN/H <sub>2</sub> O (v/v = 1:3) | 32                          |
| 3     | 10 mol % Cu <sub>2</sub> O + 20 mol % <b>L9</b>    | CH <sub>3</sub> CN/H <sub>2</sub> O (v/v = 1:3) | 94                          |
| 4     | 10 mol % Cu <sub>2</sub> O + 10 mol % <b>L9</b>    | CH <sub>3</sub> CN/H <sub>2</sub> O (v/v = 1:3) | 93                          |
| 5     | 10 mol % Cu <sub>2</sub> O + 10 mol % <b>L9</b>    | H <sub>2</sub> O                                | 85                          |

[a] General conditions: **1l** (3 mmol), *isobutylamine* (18 mmol), additive, solvent (6 mL), 100 °C, 24 h.

[b] Yields of isolated products are given.

In the coupling reaction of 4-bromoethylbenzene and *isobutylamine*, the compound **8k** was obtained with only 36 % yield in the absence of ligand **L9** (**Table S1**, entry **1**). A lower yield of 32 % could be obtained when using 10 mol % Cu<sub>2</sub>O and 20 mol % **PS-Cl** as the catalyst, indicating that **PS-Cl** did not promote the coupling reaction (entry **2**). Additionally, reduce the loading of ligand **L9** to 10



mol % did not affect the conversion (entry 3 vs entry 4). On this basis, the yield of compound **8k** was reduced when changing the solvent to H<sub>2</sub>O (entry 5). Therefore, we used 10 mol % Cu<sub>2</sub>O and 10 mol % **L9** as the catalyst system in the subsequent investigations.

### 3.6.2 Procedure for 4-ethyl-N-isobutylaniline (**8k**)

A 100 mL of flask with a magnetic stirring bar was charged with 4-Bromoethylbenzene (10 g, 54.04 mmol), /sobutylamine (32 mL, 324.42 mmol), Cu<sub>2</sub>O (0.77 g, 5.40 mmol), ligand **L9** (1.79 g, 5.40 mmol), 10 mL CH<sub>3</sub>CN and 30 mL H<sub>2</sub>O. The resulting solution was stirred at 100 °C in an oil bath for 24 h. The reaction mixture was cooled to ambient temperature, suction filtration to recover the ligand **L9**. Recovery of acetonitrile from filtrate under reduced pressure and the residue was extracted with ethyl acetate (3×30 mL). The combined extracts was dried over MgSO<sub>4</sub>, filtered and evaporated under vacuum to give the crude product, which was purified with petroleum ether /ethyl acetate to give compound **8k** as a colorless oil (8.91 g; yield: 93 %). The ligand **L9** was washed with water and acetone, and reusing under as is condition for the next catalytic cycle.

## 4. A possible reaction mechanism

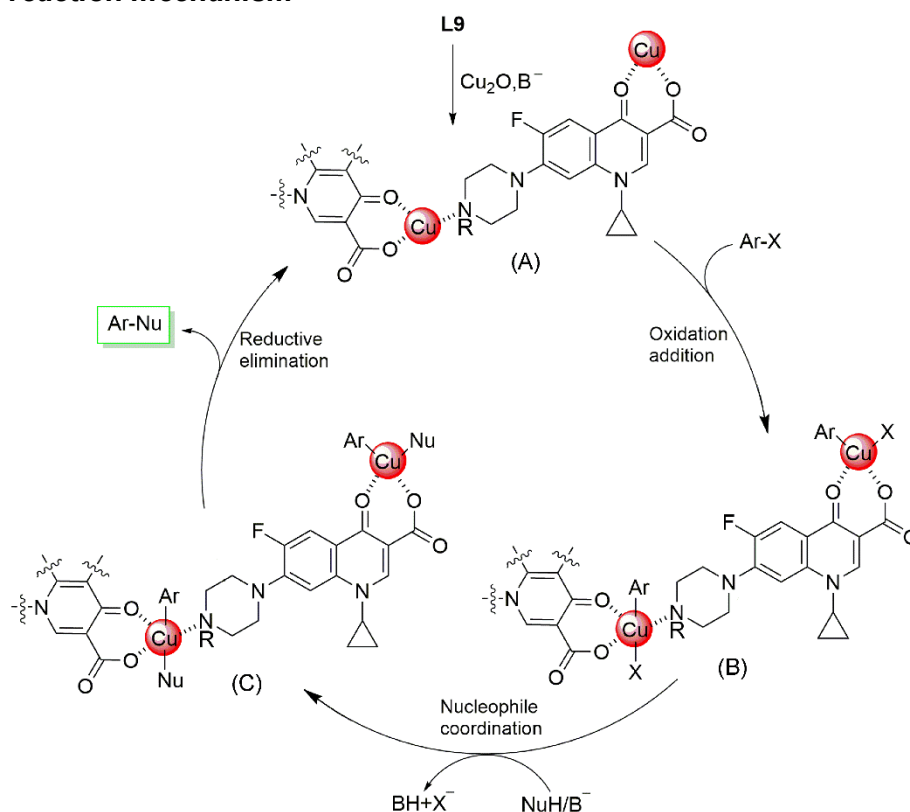

**Figure S5.** Possible Cu(I)/Cu(III) catalytic cycle mechanism for the Ullmann coupling reaction

Furthermore, we proposed a possible reaction mechanism to explain the copper-catalyzed coupling reaction. As described in **Figure S5**, the cross-coupling reaction might go through a prototypical Cu(I)/Cu(III) catalytic cycle via an oxidative addition and reductive elimination pathway. First, the coordination of the quinolones C3, C4, C7 substituents carboxyl, ketone carbonyl and a nitrogen atom in piperazine to the Cu(I) center formed the reactive species A, and then the chelating aryl halides to afford complexes B via oxidative addition process. Secondly, the complexes B react with amine to afford intermediate C under the action of base. Finally, the desired product was obtained by reductive elimination process and release the reactive species A ready to re-enter the next catalytic cycle.

## 5. Characterization

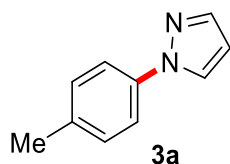

**1-p-Tolyl-1H-pyrazole (3a):** Yellowish oil;  $^1\text{H}$  NMR (400 MHz,  $\text{CDCl}_3$ )  $\delta$  7.88 (d,  $J = 2.4$  Hz, 1H), 7.71 (d,  $J = 1.8$  Hz, 1H), 7.59-7.54 (m, 2H), 7.24 (s, 2H), 6.45 (t,  $J = 2.1$  Hz, 1H), 2.38 (s, 3H);  $^{13}\text{C}$  NMR (101 MHz,  $\text{CDCl}_3$ )  $\delta$  140.74, 136.27, 129.93, 126.70, 119.22, 107.31, 20.93. <sup>[1]</sup>

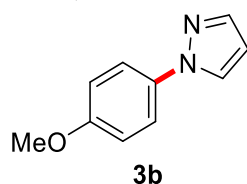

**1-(4-Methoxyphenyl)-1H-pyrazole (3b):** Colorless oil;  $^1\text{H}$  NMR (600 MHz,  $\text{CDCl}_3$ )  $\delta$  7.82 (s, 1H), 7.69 (s, 1H), 7.61-7.56 (m, 2H), 6.99-6.94 (m, 2H), 6.43 (q,  $J = 4.1, 2.0$  Hz, 1H), 3.83 (s, 3H);  $^{13}\text{C}$  NMR (151 MHz,  $\text{CDCl}_3$ )  $\delta$  158.25, 140.56, 133.99, 126.84, 120.90, 114.51, 107.17, 55.56. <sup>[2]</sup>

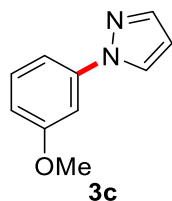

**1-(3-Methoxyphenyl)-1H-pyrazole (3c):** Colorless oil;  $^1\text{H}$  NMR (400 MHz,  $\text{CDCl}_3$ )  $\delta$  7.91 (dd,  $J = 2.5, 0.6$  Hz, 1H), 7.72 (d,  $J = 1.7$  Hz, 1H), 7.33 (t,  $J = 8.1$  Hz, 1H), 7.32-7.29 (m, 1H), 7.23 (ddd,  $J = 7.9, 2.1, 1.0$  Hz, 1H), 6.83 (ddd,  $J = 8.2, 2.6, 0.9$  Hz, 1H), 6.46 (dd,  $J = 2.5, 1.8$  Hz, 1H), 3.87 (s, 3H);  $^{13}\text{C}$  NMR (101 MHz,  $\text{CDCl}_3$ )  $\delta$  160.55, 141.32, 140.99, 130.16, 126.92, 112.43, 111.17, 107.60, 105.09, 55.52. <sup>[2]</sup>

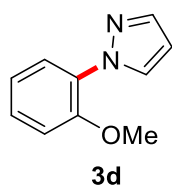

**1-(2-Methoxyphenyl)-1H-pyrazole (3d):** Colorless oil;  $^1\text{H}$  NMR (400 MHz,  $\text{CDCl}_3$ )  $\delta$  8.03 (d,  $J = 2.4$  Hz, 1H), 7.73 (s, 1H), 7.73-7.70 (dd,  $J = 7.9, 4.2$  Hz, 1H), 7.34-7.29 (m, 1H), 7.10-7.04 (m, 2H), 6.45 (t,  $J = 2.1$  Hz, 1H), 3.89 (s, 3H);  $^{13}\text{C}$  NMR (101 MHz,  $\text{CDCl}_3$ )  $\delta$  151.35, 140.03, 131.58, 128.05, 125.34, 121.18, 112.29, 106.16, 77.21, 55.99, 29.71. <sup>[2]</sup>

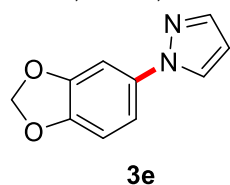

**1-(Benzo[d][1,3]dioxol-5-yl)-1H-pyrazole (3e):** White solid;  $^1\text{H}$  NMR (400 MHz,  $\text{CDCl}_3$ )  $\delta$  7.80 (dd,  $J = 2.4, 0.6$  Hz, 1H), 7.68 (d,  $J = 1.8$  Hz, 1H), 7.22 (d,  $J = 2.2$  Hz, 1H), 7.10 (dd,  $J = 8.3, 2.2$  Hz, 1H), 6.85 (d,  $J = 8.4$  Hz, 1H), 6.43 (dd,  $J = 2.4, 1.8$  Hz, 1H), 6.02 (s, 2H);  $^{13}\text{C}$  NMR (101 MHz,  $\text{CDCl}_3$ )  $\delta$  148.39, 146.26, 140.68, 135.21, 127.00, 112.63, 108.29, 107.29, 101.96, 101.70.

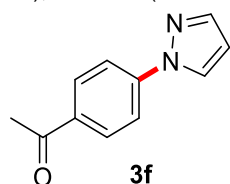

**1-p-Tolyl-1H-pyrazole (3f):** White solid;  $^1\text{H}$  NMR (600 MHz,  $\text{CDCl}_3$ )  $\delta$  8.06 (dd,  $J = 6.8, 1.9$  Hz, 2H), 8.02 (d,  $J = 2.5$  Hz, 1H), 7.81 (dd,  $J = 6.7, 1.8$  Hz, 2H), 7.77 (d,  $J = 1.7$  Hz, 1H), 6.52 (t,  $J = 2.2, 1.9$  Hz, 1H), 2.63 (s, 3H);  $^{13}\text{C}$  NMR (151 MHz,  $\text{CDCl}_3$ )  $\delta$  196.71, 143.19, 141.92, 134.73, 129.91, 126.79, 118.32, 108.48, 26.50.

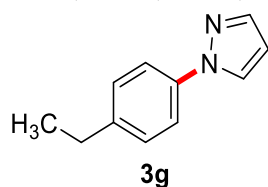

**1-(4-Ethylphenyl)-1H-pyrazole (3g):** White solid;  $^1\text{H NMR}$  (400 MHz,  $\text{CDCl}_3$ )  $\delta$  7.89 (d,  $J = 2.5$  Hz, 1H), 7.71 (d,  $J = 1.7$  Hz, 1H), 7.62-7.57 (m, 2H), 7.30-7.26 (m, 2H), 6.45 (t,  $J = 2.1$  Hz, 1H), 2.68 (q,  $J = 7.6$  Hz, 2H), 1.26 (t,  $J = 7.6$  Hz, 3H);  $^{13}\text{C NMR}$  (101 MHz,  $\text{CDCl}_3$ )  $\delta$  142.69, 140.74, 138.12, 128.76, 126.73, 119.33, 107.31, 28.34, 15.58. <sup>[3]</sup>

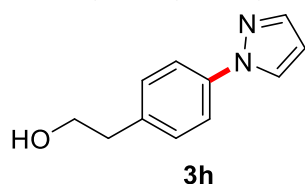

**2-(4-(1H-pyrazol-1-yl)phenyl)ethanol (3h):** Yellowish oil;  $^1\text{H NMR}$  (400 MHz,  $\text{CDCl}_3$ )  $\delta$  7.90 (d,  $J = 2.5$  Hz, 1H), 7.72 (d,  $J = 1.9$  Hz, 1H), 7.63 (dt,  $J = 6.2, 4.4$  Hz, 2H), 7.31 (dt,  $J = 6.3, 4.4$  Hz, 2H), 6.46 (t,  $J = 2.2$  Hz, 1H), 3.89 (t,  $J = 6.5$  Hz, 2H), 2.90 (t,  $J = 6.5$  Hz, 2H).  $^{13}\text{C NMR}$  (101 MHz,  $\text{CDCl}_3$ )  $\delta$  140.95, 138.79, 136.99, 130.00, 126.79, 119.49, 107.53, 76.77, 63.54, 38.59.

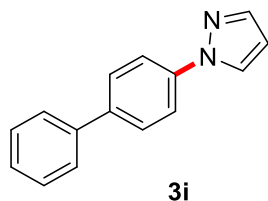

**1-[1,1'-Biphenyl]-4-yl-1H-pyrazole (3i):** White solid;  $^1\text{H NMR}$  (400 MHz,  $\text{CDCl}_3$ )  $\delta$  7.97 (d,  $J = 2.4$  Hz, 1H), 7.81-7.74 (m, 3H), 7.72-7.66 (m, 2H), 7.65-7.58 (m, 2H), 7.48-7.44 (m, 2H), 7.40-7.34 (m, 1H), 6.50 (t,  $J = 2.1$  Hz, 1H);  $^{13}\text{C NMR}$  (101 MHz,  $\text{CDCl}_3$ )  $\delta$  141.15, 140.11, 139.38, 139.35, 128.88, 128.07, 127.50, 126.97, 126.74, 119.47, 107.72. <sup>[2]</sup>

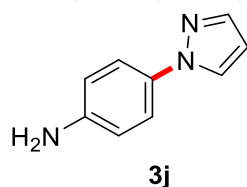

**4-(1H-Pyrazol-1-yl)aniline (3j):** White solid;  $^1\text{H NMR}$  (400 MHz,  $\text{CDCl}_3$ )  $\delta$  7.77 (d,  $J = 2.4$  Hz, 1H), 7.66 (d,  $J = 1.8$  Hz, 1H), 7.42 (dt,  $J = 9.7, 3.2$  Hz, 2H), 6.72 (dt,  $J = 9.7, 3.2$  Hz, 2H), 6.40 (t,  $J = 2.1$  Hz, 1H), 3.73 (s, 2H);  $^{13}\text{C NMR}$  (101 MHz,  $\text{CDCl}_3$ )  $\delta$  145.26, 140.24, 132.45, 126.70, 121.10, 115.46, 106.81. <sup>[4]</sup>

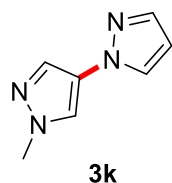

**1-Methyl-4-(1H-pyrazol-1-yl)-1H-pyrazole (3k):** Yellow oil;  $^1\text{H NMR}$  (400 MHz,  $\text{CDCl}_3$ )  $\delta$  7.70 (s, 1H), 7.69 (s, 1H), 7.66-7.63 (m, 2H), 6.40 (t,  $J = 2.2$  Hz, 1H), 3.94 (s, 3H);  $^{13}\text{C NMR}$  (101 MHz,  $\text{CDCl}_3$ )  $\delta$  140.31, 130.53, 128.01, 121.95, 106.72, 39.56. <sup>[4]</sup>

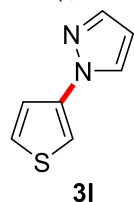

**1-(3-Thienyl)-1H-pyrazole (3l):** Colorless oil;  $^1\text{H NMR}$  (400 MHz,  $\text{CDCl}_3$ )  $\delta$  7.80 (d,  $J = 2.4$  Hz, 1H), 7.67 (d,  $J = 1.8$  Hz, 1H), 7.40-7.32 (m, 3H), 6.41 (t,  $J = 2.2$  Hz, 1H);  $^{13}\text{C NMR}$  (101 MHz,  $\text{CDCl}_3$ )  $\delta$  140.60, 139.83, 127.46, 126.48, 120.32, 110.62, 107.05. <sup>[4]</sup>

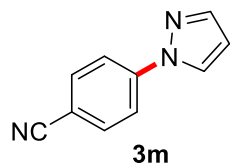

**1-(4-Cyanophenyl)-1H-pyrazole (3m):** White solid;  $^1\text{H NMR}$  (400 MHz,  $\text{CDCl}_3$ )  $\delta$  7.89 (d,  $J = 2.5$  Hz, 1H), 7.73 (d,  $J = 1.7$  Hz, 1H), 7.63 (dt,  $J = 9.7, 3.0$  Hz, 2H), 7.41 (dt,  $J = 9.8, 3.1$  Hz, 2H), 6.48 (dd,  $J = 2.5, 1.8$  Hz, 1H);  $^{13}\text{C NMR}$  (101 MHz,  $\text{CDCl}_3$ )  $\delta$  141.35, 138.74, 131.91, 129.52, 126.69, 120.32, 107.98. <sup>[1]</sup>

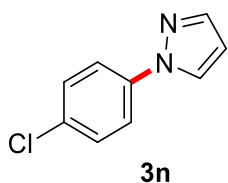

**1-(4-Bromophenyl)-1H-pyrazole (3n):** White solid;  $^1\text{H NMR}$  (400 MHz,  $\text{CDCl}_3$ )  $\delta$  7.89 (d,  $J = 2.5$  Hz, 1H), 7.73 (d,  $J = 1.8$  Hz, 1H), 7.64 (dt,  $J = 6.7, 3$  Hz, 2H), 7.41 (dt,  $J = 9.7, 3.1$  Hz, 2H), 6.48 (t,  $J = 2.2$  Hz, 1H);  $^{13}\text{C NMR}$  (101 MHz,  $\text{CDCl}_3$ )  $\delta$  141.36, 138.75, 131.91, 129.52, 126.69, 120.32, 107.98. <sup>[3]</sup>

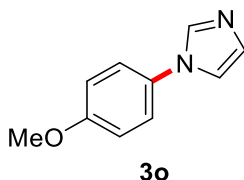

**1-(4-Methoxyphenyl)-1H-imidazole (3o):** Light brown solid;  $^1\text{H NMR}$  (400 MHz,  $\text{CDCl}_3$ )  $\delta$  7.78 (s, 1H), 7.30 (dt,  $J = 10.2, 3.4$  Hz, 2H), 7.22 (s, 1H), 7.20 (s, 1H), 6.99 (dt,  $J = 10.2, 3.5$  Hz, 2H), 3.85 (s, 3H);  $^{13}\text{C NMR}$  (101 MHz,  $\text{CDCl}_3$ )  $\delta$  158.95, 130.77, 130.11, 123.25, 114.91, 55.62. <sup>[5]</sup>

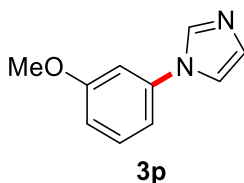

**1-(3-Methoxyphenyl)-1H-imidazole (3p):** Colorless oil;  $^1\text{H NMR}$  (400 MHz,  $\text{CDCl}_3$ )  $\delta$  7.86 (t,  $J = 1.1$  Hz, 1H), 7.38 (td,  $J = 8.0, 0.7$  Hz, 1H), 7.28 (t,  $J = 1.4$  Hz, 1H), 7.20 (t,  $J = 1.2$  Hz, 1H), 6.98 (ddd,  $J = 7.9, 2.0, 0.9$  Hz, 1H), 6.95-6.86 (m, 2H), 3.86 (s, 3H), 1.27 (d,  $J = 11.1$  Hz, 0H);  $^{13}\text{C NMR}$  (101 MHz,  $\text{CDCl}_3$ )  $\delta$  160.69, 138.46, 135.62, 130.72, 130.33, 118.28, 113.67, 112.66, 107.75, 55.55. <sup>[5]</sup>

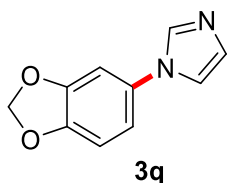

**1-(Benzo[d][1,3]dioxol-5-yl)-1H-imidazole (3q):** Brown solid;  $^1\text{H NMR}$  (400 MHz,  $\text{CDCl}_3$ )  $\delta$  7.75 (s, 1H), 7.18 (s, 2H), 6.89-6.82 (m, 3H), 6.05 (s, 2H);  $^{13}\text{C NMR}$  (101 MHz,  $\text{CDCl}_3$ )  $\delta$  148.63, 147.12, 135.95, 131.81, 130.07, 118.91, 115.30, 108.68, 103.76, 101.97. <sup>[6]</sup>

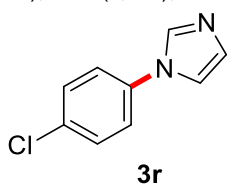

**1-(4-Chlorophenyl)-1H-imidazole (3r):** White solid;  $^1\text{H NMR}$  (400 MHz,  $\text{CDCl}_3$ )  $\delta$  7.85 (t,  $J = 1.2$  Hz, 1H), 7.46 (dt,  $J = 9.5, 2.9$  Hz, 2H), 7.33 (dt,  $J = 9.6, 3.0$  Hz, 2H), 7.26 (t,  $J = 1.4$  Hz, 1H), 7.23 (t,  $J = 1.1$  Hz, 1H);  $^{13}\text{C NMR}$  (101 MHz,  $\text{CDCl}_3$ )  $\delta$  135.87, 135.52, 133.29, 130.62, 130.07, 122.75, 118.23. <sup>[2]</sup>

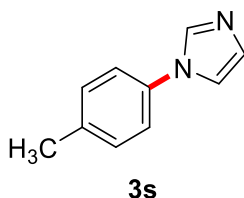

**1-p-Tolyl-1H-imidazole (3s):** White solid;  $^1\text{H NMR}$  (400 MHz,  $\text{CDCl}_3$ )  $\delta$  7.84 (s, 1H), 7.28 (s, 4H), 7.25 (t,  $J = 1.4$  Hz, 1H), 7.21 (d,  $J = 1.2$  Hz, 1H), 2.41 (s, 3H);  $^{13}\text{C NMR}$  (101 MHz,  $\text{CDCl}_3$ )  $\delta$  137.55, 135.60, 134.97, 130.38, 130.05, 121.49, 118.43, 20.98. <sup>[5]</sup>

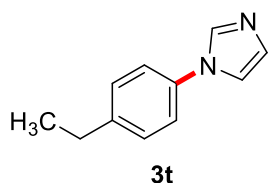

**1-(4-Ethylphenyl)-1H-imidazole (3t):** Yellowish oil;  $^1\text{H NMR}$  (400 MHz,  $\text{CDCl}_3$ )  $\delta$  7.83 (t,  $J = 1.1$  Hz, 1H), 7.30 (s, 4H), 7.26 (d,  $J = 1.3$  Hz, 1H), 7.20 (d,  $J = 1.2$  Hz, 1H), 2.70 (q,  $J = 7.6$  Hz, 2H), 1.27 (t,  $J = 7.6$  Hz, 3H);  $^{13}\text{C NMR}$  (101 MHz,  $\text{CDCl}_3$ )  $\delta$  143.86, 135.64, 135.16, 130.14, 129.21, 121.59, 118.42, 28.38, 15.55. <sup>[7]</sup>

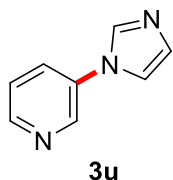

**3-(1H-imidazol-1-yl)pyridine (3u):** White solid;  $^1\text{H NMR}$  (400 MHz,  $\text{CDCl}_3$ )  $\delta$  8.77 (d,  $J = 2.6$  Hz, 1H), 8.65 (dd,  $J = 4.8, 1.4$  Hz, 1H), 7.91 (s, 1H), 7.74 (dq,  $J = 8.2, 2.7, 1.5$  Hz, 1H), 7.46 (dd,  $J = 8.2, 4.7$  Hz, 1H), 7.32 (s, 1H), 7.28 (s, 1H);  $^{13}\text{C NMR}$  (101 MHz,  $\text{CDCl}_3$ )  $\delta$  148.88, 142.98, 133.91, 131.14, 128.85, 124.29, 118.13. <sup>[5]</sup>

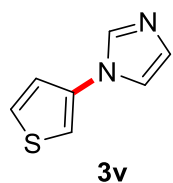

**1-(3-Thienyl)-1H-imidazole (3v):** White solid;  $^1\text{H NMR}$  (400 MHz,  $\text{CDCl}_3$ )  $\delta$  7.87 (s, 1H), 7.43 (dd,  $J = 5.2, 3.2$  Hz, 1H), 7.27-7.11 (m, 4H);  $^{13}\text{C NMR}$  (101 MHz,  $\text{CDCl}_3$ )  $\delta$  136.19, 129.85, 127.22, 121.45, 118.70, 113.35. <sup>[5]</sup>

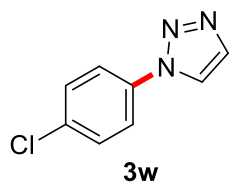

**1-(4-Chlorophenyl)-1H-1,2,3-triazole (3w):** White solid;  $^1\text{H NMR}$  (600 MHz,  $\text{CDCl}_3$ )  $\delta$  8.56 (s, 1H), 8.11 (s, 1H), 7.64 (dt,  $J = 9.8, 3.1$  Hz, 2H), 7.49 (dt,  $J = 9.8, 3.2$  Hz, 2H);  $^{13}\text{C NMR}$  (151 MHz,  $\text{CDCl}_3$ )  $\delta$  152.75, 140.84, 135.52, 133.96, 129.97, 121.24. <sup>[8]</sup>

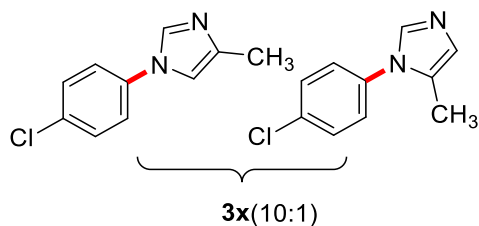

**4-Methyl-1-(4-chlorophenyl)-1H-imidazole and 2-Methyl-1-(4-chlorophenyl)-1H-imidazole (3x):** White solid;  $^1\text{H NMR}$  (600 MHz,  $\text{CDCl}_3$ )  $\delta$  7.75 (d,  $J = 1.4$  Hz, 1H), 7.43 (dt,  $J = 9.7, 3.1$  Hz, 2H), 7.30 (dt,  $J = 9.8, 3.2$  Hz, 2H), 6.98 (s, 1H), 2.30 (d,  $J = 1.0$  Hz, 3H);  $^{13}\text{C NMR}$  (151 MHz,  $\text{CDCl}_3$ )  $\delta$  139.52, 135.88, 134.44, 132.94, 130.01, 129.84, 126.88, 122.33, 114.64, 29.70, 13.50.

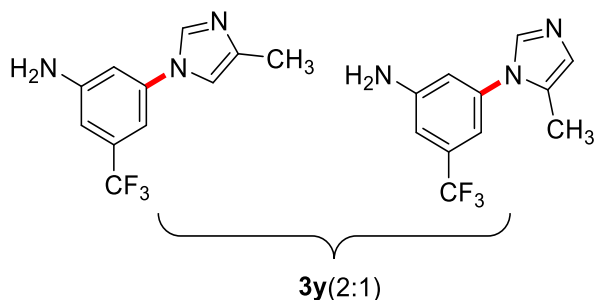

**3-(4-Methyl-1H-imidazol-1-yl)-5-(trifluoromethyl)aniline and 3-(2-Methyl-1H-imidazol-1-yl)-5-(trifluoromethyl)aniline (3y):** White solid;  $^1\text{H NMR}$  (600 MHz,  $\text{CDCl}_3$ )  $\delta$  7.76 (s, 1H), 7.56 (s, 0H), 6.99 (s, 1H), 6.94 (s, 2H), 6.90 (s, 1H), 6.87 (s, 1H), 6.84 (s, 1H), 6.78

(s, 1H), 6.70 (s, 0H), 4.12 (s, 3H), 2.29 (s, 3H), 2.19 (s, 2H);  $^{13}\text{C}$  NMR (151 MHz,  $\text{CDCl}_3$ )  $\delta$  148.25, 148.05, 139.67, 138.80, 137.92, 134.38, 133.27, 127.51, 124.28, 114.36, 114.23, 111.63, 111.61, 110.92, 109.77, 109.75, 109.53, 107.20, 13.55, 9.78.<sup>[9]</sup>

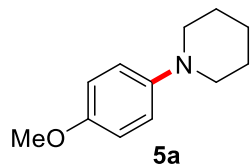

**1-(4-Methoxyphenyl)piperidine (5a):** Colorless oil;  $^1\text{H}$  NMR (400 MHz,  $\text{CDCl}_3$ )  $\delta$  6.92 (d,  $J = 8.8$  Hz, 2H), 6.82 (dt,  $J = 10.3, 3.6$  Hz, 2H), 3.76 (s, 3H), 3.02 (t,  $J = 5.4$  Hz, 4H), 1.75-1.70 (m, 4H), 1.57-1.51 (m, 2H);  $^{13}\text{C}$  NMR (151 MHz,  $\text{CDCl}_3$ )  $\delta$  118.75, 114.25, 55.48, 52.29, 25.97, 24.03.<sup>[18]</sup>

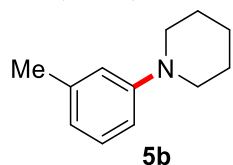

**1-(3-Methylphenyl)piperidine (5b):** Yellowish oil;  $^1\text{H}$  NMR (400 MHz,  $\text{CDCl}_3$ )  $\delta$  7.14 (t,  $J = 7.7$  Hz, 1H), 6.77 (s, 2H), 6.65 (d,  $J = 7.4$  Hz, 1H), 3.14 (t,  $J = 5.5$  Hz, 4H), 2.31 (s, 3H), 1.74-1.68 (m, 4H), 1.60-1.54 (m, 2H);  $^{13}\text{C}$  NMR (101 MHz,  $\text{CDCl}_3$ )  $\delta$  138.64, 128.85, 120.15, 117.48, 113.71, 50.84, 25.88, 24.32, 21.78.<sup>[11]</sup>

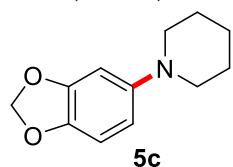

**1-(Benzo[d][1,3]dioxol-5-yl)piperidine (5c):** Yellowish solid;  $^1\text{H}$  NMR (600 MHz,  $\text{CDCl}_3$ )  $\delta$  6.71 (d,  $J = 8.4$  Hz, 1H), 6.58 (s, 1H), 6.38 (s, 1H), 5.88 (s, 2H), 3.01 (t,  $J = 5.5$  Hz, 4H), 1.71 (s, 4H), 1.56-1.52 (m, 2H);  $^{13}\text{C}$  NMR (151 MHz,  $\text{CDCl}_3$ )  $\delta$  148.04, 108.05, 100.82, 100.57, 52.85, 25.71, 23.86.<sup>[12]</sup>

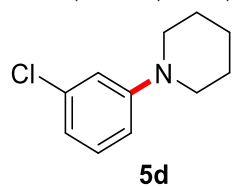

**1-(3-Chlorophenyl)piperidine (5d):** Colorless oil;  $^1\text{H}$  NMR (400 MHz,  $\text{CDCl}_3$ )  $\delta$  7.06 (t,  $J = 8.1$  Hz, 1H), 6.83-6.78 (m, 1H), 6.75-6.65 (m, 2H), 3.11-3.06 (m, 4H), 1.64-1.59 (m, 4H), 1.53-1.48 (m, 2H);  $^{13}\text{C}$  NMR (101 MHz,  $\text{CDCl}_3$ )  $\delta$  152.04, 133.81, 128.87, 117.56, 114.98, 113.24, 49.10, 24.57, 23.19.

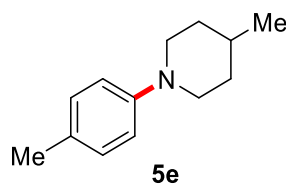

**4-Methyl-1-(p-tolyl)piperidine (5e):** Yellowish solid;  $^1\text{H}$  NMR (400 MHz,  $\text{CDCl}_3$ )  $\delta$  7.05 (d,  $J = 8.3$  Hz, 2H), 6.87 (d,  $J = 8.0$  Hz, 2H), 3.57 (dt,  $J = 11.7, 2.5$  Hz, 2H), 2.64 (td,  $J = 12.0, 2.5$  Hz, 2H), 2.26 (s, 3H), 1.77-1.68 (m, 2H), 1.50-1.44 (m, 1H), 1.43-1.30 (m, 2H), 0.97 (d,  $J = 6.3$  Hz, 3H);  $^{13}\text{C}$  NMR (101 MHz,  $\text{CDCl}_3$ )  $\delta$  129.55, 116.95, 50.71, 34.21, 30.70, 21.91, 20.44.

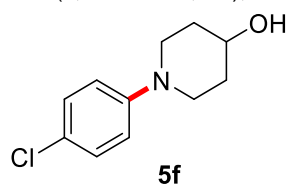

**1-(4-Chlorophenyl)piperidin-4-ol (5f):** Yellowish solid;  $^1\text{H}$  NMR (400 MHz,  $\text{CDCl}_3$ )  $\delta$  7.19 (d,  $J = 8.4$  Hz, 2H), 6.86 (d,  $J = 8.4$  Hz, 2H), 3.86 (s, 1H), 3.51 (d,  $J = 13.4$  Hz, 2H), 2.91 (t,  $J = 11.2$  Hz, 2H), 1.99 (s, 2H), 1.70-1.67 (m, 2H), 1.46 (s, 1H).  $^{13}\text{C}$  NMR (101 MHz,  $\text{CDCl}_3$ )  $\delta$  128.97, 117.72, 109.31, 67.65, 47.28, 34.00.

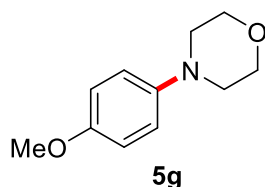

**4-(4-Methoxyphenyl)morpholine (5g):** White solid;  $^1\text{H NMR}$  (600 MHz,  $\text{CDCl}_3$ )  $\delta$  6.90 (d,  $J = 8.7$  Hz, 2H), 6.85 (d,  $J = 9.0$  Hz, 2H), 3.86 (t,  $J = 4.5$  Hz, 4H), 3.77 (s, 3H), 3.06 (t,  $J = 4.6$  Hz, 4H);  $^{13}\text{C NMR}$  (151 MHz,  $\text{CDCl}_3$ )  $\delta$  117.75, 114.44, 66.94, 55.49, 50.77.<sup>[13]</sup>

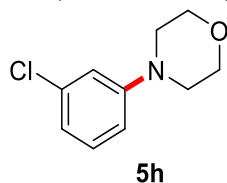

**4-(3-Chlorophenyl)morpholine (5h):** Colorless oil;  $^1\text{H NMR}$  (400 MHz,  $\text{CDCl}_3$ )  $\delta$  7.18 (t,  $J = 8.1$  Hz, 1H), 6.87 (t,  $J = 2.2$  Hz, 1H), 6.84 (dt,  $J = 7.8, 1.2$  Hz, 1H), 6.78 (dd,  $J = 8.5, 2.4$  Hz, 1H), 3.88-3.82 (m, 4H), 3.17-3.13 (m, 4H);  $^{13}\text{C NMR}$  (101 MHz,  $\text{CDCl}_3$ )  $\delta$  152.26, 135.06, 130.11, 119.80, 115.58, 113.66, 66.72, 48.96.<sup>[13]</sup>

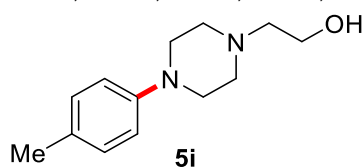

**2-(4-(p-Tolyl)piperazin-1-yl)ethan-1-ol (5i):** Yellowish solid;  $^1\text{H NMR}$  (400 MHz,  $\text{CDCl}_3$ )  $\delta$  7.08 (d,  $J = 8.3$  Hz, 2H), 6.84 (dt,  $J = 9.4, 3.1$  Hz, 2H), 3.67 (t,  $J = 5.4$  Hz, 2H), 3.17 (m, 4H), 2.79 (s, 1H), 2.72-2.67 (m, 4H), 2.62 (t,  $J = 5.4$  Hz, 2H), 2.27 (s, 3H);  $^{13}\text{C NMR}$  (101 MHz,  $\text{CDCl}_3$ )  $\delta$  149.10, 129.66, 129.41, 116.48, 59.33, 57.73, 52.95, 49.77, 20.43; ESI-MS ( $m/z$ ):221.11 [ $\text{M}+\text{H}^+$ ].

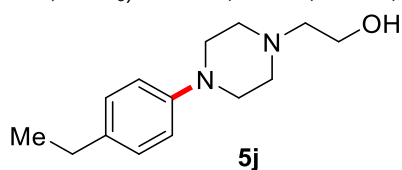

**2-(4-(4-Ethylphenyl)piperazin-1-yl)ethan-1-ol (5j):** Colorless oil;  $^1\text{H NMR}$  (600 MHz,  $\text{CDCl}_3$ )  $\delta$  7.13 (d,  $J = 8.2$  Hz, 2H), 6.87 (d,  $J = 8.3$  Hz, 2H), 3.92 (t,  $J = 5.0$  Hz, 2H), 3.39 (t,  $J = 5.1$  Hz, 4H), 3.16 (s, 4H), 3.01 (t,  $J = 5.3$  Hz, 2H), 2.59 (q,  $J = 7.6$  Hz, 2H), 1.21 (t,  $J = 7.6$  Hz, 3H);  $^{13}\text{C NMR}$  (151 MHz,  $\text{CDCl}_3$ )  $\delta$  147.60, 128.66, 117.26, 59.97, 56.33, 53.10, 47.65, 27.87, 15.59.

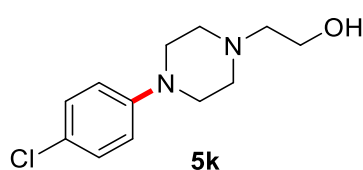

**2-(4-(4-Chlorophenyl)piperazin-1-yl)ethan-1-ol (5k):** White solid;  $^1\text{H NMR}$  (600 MHz,  $\text{CDCl}_3$ )  $\delta$  7.14 (dt,  $J = 12.0, 2.2$  Hz, 2H), 6.77 (dt,  $J = 12.0, 2.1$  Hz, 2H), 3.69 (t,  $J = 5.2$  Hz, 2H), 3.20 (t,  $J = 5.0$  Hz, 4H), 2.77 (t,  $J = 5.0$  Hz, 4H), 2.68 (t,  $J = 5.3$  Hz, 2H);  $^{13}\text{C NMR}$  (151 MHz,  $\text{CDCl}_3$ )  $\delta$  149.33, 128.97, 125.09, 117.48, 59.57, 57.31, 52.76, 48.65.<sup>[18]</sup>

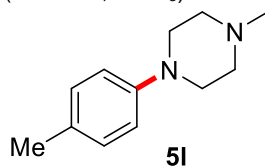

**1-(p-Tolyl)-4-methylpiperazine (5l):** Colorless oil;  $^1\text{H NMR}$  (600 MHz,  $\text{CDCl}_3$ )  $\delta$  7.07 (d,  $J = 8.2$  Hz, 2H), 6.85 (d,  $J = 8.4$  Hz, 2H), 3.19 (t,  $J = 5.0$  Hz, 4H), 2.62 (s, 4H), 2.38 (s, 3H), 2.27 (s, 3H);  $^{13}\text{C NMR}$  (151 MHz,  $\text{CDCl}_3$ )  $\delta$  148.91, 129.68, 116.60, 54.97, 49.35, 45.79, 29.71, 20.43. <sup>[10]</sup>

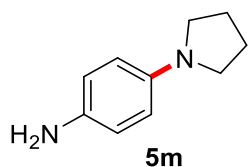

**4-(Pyrrolidin-1-yl)aniline (5m):** Brown oil;  $^1\text{H NMR}$  (600 MHz,  $\text{CDCl}_3$ )  $\delta$  6.67 (d,  $J = 8.2$  Hz, 2H), 6.48 (d,  $J = 8.2$  Hz, 2H), 3.42 (s, 2H), 3.21 (s, 4H), 2.00-1.94 (m, 4H);  $^{13}\text{C NMR}$  (151 MHz,  $\text{CDCl}_3$ )  $\delta$  142.28, 135.99, 117.02, 112.95, 48.26, 25.19.<sup>[14]</sup>

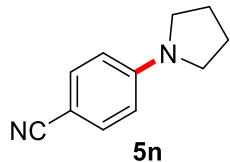

**4-(Pyrrolidin-1-yl)benzonitrile (5n):** White solid;  $^1\text{H NMR}$  (400 MHz,  $\text{CDCl}_3$ )  $\delta$  7.45 (dt,  $J = 9.7, 2.8$  Hz, 2H), 6.51 (dt,  $J = 9.6, 2.8$  Hz, 2H), 3.36-3.31 (m, 4H), 2.07-2.02 (m, 4H);  $^{13}\text{C NMR}$  (101 MHz,  $\text{CDCl}_3$ )  $\delta$  150.01, 133.47, 121.01, 111.46, 96.62, 47.50, 25.43.<sup>[10]</sup>

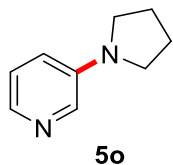

**3-(Pyrrolidin-1-yl)pyridine (5o):** Colorless oil;  $^1\text{H NMR}$  (400 MHz,  $\text{CDCl}_3$ )  $\delta$  8.01 (s, 1H), 7.98 (s, 1H), 7.12 (t,  $J = 6.3$  Hz, 1H), 6.82 (ddd,  $J = 8.4, 3.0, 1.2$  Hz, 1H), 3.34-3.27 (m, 4H), 2.06-2.00 (m, 4H);  $^{13}\text{C NMR}$  (101 MHz,  $\text{CDCl}_3$ )  $\delta$  136.62, 134.08, 117.86, 47.30, 29.71, 25.39.<sup>[15]</sup>

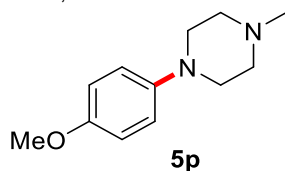

**1-(4-Methoxyphenyl)-4-methylpiperazine (5p):** White solid;  $^1\text{H NMR}$  (600 MHz,  $\text{CDCl}_3$ )  $\delta$  6.90 (dt,  $J = 10.6, 3.7$  Hz, 2H), 6.84 (dt,  $J = 10.6, 3.9$  Hz, 2H), 3.77 (s, 3H), 3.12 (t,  $J = 4.9$  Hz, 4H), 2.61 (t,  $J = 4.9$  Hz, 4H), 2.37 (s, 3H);  $^{13}\text{C NMR}$  (151 MHz,  $\text{CDCl}_3$ )  $\delta$  153.74, 145.54, 118.13, 114.35, 55.49, 55.15, 50.42, 45.97.<sup>[16]</sup>

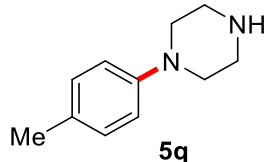

**1-(1-(p-Tolyl)piperazine (5q):** White solid;  $^1\text{H NMR}$  (400 MHz,  $\text{CDCl}_3$ )  $\delta$  7.07 (dd,  $J = 8.4, 2.2$  Hz, 2H), 6.84 (dt,  $J = 8.5, 2.1$  Hz, 2H), 3.12-3.10 (m, 4H), 3.09-2.99 (m, 4H), 2.43 (s, 1H), 2.27 (s, 3H);  $^{13}\text{C NMR}$  (101 MHz,  $\text{CDCl}_3$ )  $\delta$  149.67, 129.64, 129.41, 116.56, 50.83, 46.05, 20.43. ESI-MS ( $m/z$ ): 177.37 [ $\text{M}+\text{H}^+$ ].<sup>[17]</sup>

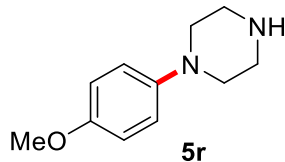

**1-(4-Methoxyphenyl)piperazine (5r):** Yellowish solid;  $^1\text{H NMR}$  (600 MHz,  $\text{CDCl}_3$ )  $\delta$  6.90 (dt,  $J = 10.4, 4.0$  Hz, 2H), 6.84 (dt,  $J = 10.3, 3.6$  Hz, 2H), 3.77 (s, 3H), 3.10 (s, 8H);  $^{13}\text{C NMR}$  (151 MHz,  $\text{CDCl}_3$ )  $\delta$  154.54, 145.20, 119.05, 114.53, 55.56, 50.16, 44.94; ESI-MS ( $m/z$ ): 193.24 [ $\text{M}+\text{H}^+$ ].<sup>[18]</sup>

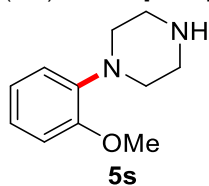



**1-(2-Methoxyphenyl)piperazine (5s):** Colorless oil;  $^1\text{H NMR}$  (600 MHz,  $\text{CDCl}_3$ )  $\delta$  6.95-6.91 (m, 1H), 6.89-6.83 (m, 2H), 6.79 (dd,  $J = 8.0, 1.3$  Hz, 1H), 3.79 (s, 3H), 3.02-3.00 (m, 4H), 3.00-2.95 (m, 4H), 2.40 (s, 1H);  $^{13}\text{C NMR}$  (151 MHz,  $\text{CDCl}_3$ )  $\delta$  152.20, 141.59, 122.89, 120.90, 118.18, 111.13, 55.27, 51.79, 46.13; ESI-MS ( $m/z$ ): 193.21 [ $\text{M}+\text{H}^+$ ].<sup>[18]</sup>

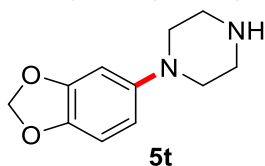

**1-(Benzo[d][1,3]dioxol-5-yl)piperazine (5t):** White solid; m.p. 67-68 °C;  $^1\text{H NMR}$  (600 MHz,  $\text{CDCl}_3$ )  $\delta$  6.72 (d,  $J = 8.4$  Hz, 1H), 6.56 (d,  $J = 2.4$  Hz, 1H), 6.37 (dd,  $J = 8.4, 2.4$  Hz, 1H), 5.90 (s, 2H), 3.03 (s, 8H), 2.11 (s, 1H);  $^{13}\text{C NMR}$  (151 MHz,  $\text{CDCl}_3$ )  $\delta$  148.23, 147.66, 141.79, 109.32, 108.18, 100.91, 100.19, 51.64, 45.86; ESI-MS ( $m/z$ ): 207.11 [ $\text{M}+\text{H}^+$ ].<sup>[18]</sup>

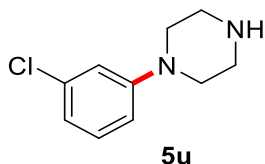

**1-(3-Chlorophenyl)piperazine (5u):** Colorless oil;  $^1\text{H NMR}$  (400 MHz,  $\text{CDCl}_3$ )  $\delta$  7.16 (t,  $J = 8.1$  Hz, 1H), 6.87 (t,  $J = 2.2$  Hz, 1H), 6.83-6.76 (m, 2H), 3.18-3.11 (m, 4H), 3.04-3.01 (m, 4H), 1.89 (s, 1H);  $^{13}\text{C NMR}$  (101 MHz,  $\text{CDCl}_3$ )  $\delta$  152.81, 134.95, 130.00, 119.32, 115.81, 113.95, 49.86, 45.98. ESI-MS ( $m/z$ ): 197.09, 199.10 [ $\text{M}+\text{H}^+$ ].<sup>[18]</sup>

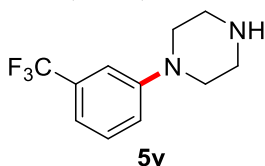

**1-(3-(Trifluoromethyl)phenyl)piperazine (5v):** Colorless oil;  $^1\text{H NMR}$  (600 MHz,  $\text{CDCl}_3$ )  $\delta$  7.32 (t,  $J = 8.0$  Hz, 1H), 7.11 (d,  $J = 7.7$  Hz, 1H), 7.06 (s, 1H), 7.01 (dd,  $J = 8.4, 2.5$  Hz, 1H), 3.40 (t,  $J = 5.0$  Hz, 4H), 3.26 (t,  $J = 5.0$  Hz, 4H);  $^{13}\text{C NMR}$  (151 MHz,  $\text{CDCl}_3$ )  $\delta$  150.45, 129.79, 119.77, 117.59, 113.33, 113.30, 47.23, 43.83; ESI-MS ( $m/z$ ): 231.25 [ $\text{M}+\text{H}^+$ ].<sup>[18]</sup>

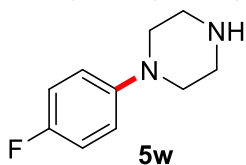

**1-(4-Fluorophenyl)piperazine (5w):** Colorless oil;  $^1\text{H NMR}$  (600 MHz,  $\text{CDCl}_3$ )  $\delta$  6.92-6.87 (m, 2H), 6.83-6.79 (m, 2H), 3.01 (d,  $J = 5.4$  Hz, 4H), 2.99 (d,  $J = 5.9$  Hz, 4H), 2.41 (s, 1H);  $^{13}\text{C NMR}$  (151 MHz,  $\text{CDCl}_3$ )  $\delta$  157.97, 117.95, 117.90, 115.51, 115.36, 51.12, 45.90. ESI-MS ( $m/z$ ): 181.19 [ $\text{M}+\text{H}^+$ ].<sup>[18]</sup>

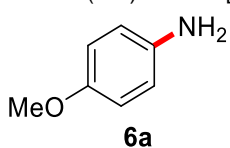

**4-Methoxybenzenamine (6a):** Brown solid;  $^1\text{H NMR}$  (400 MHz,  $\text{CDCl}_3$ )  $\delta$  6.74 (dt,  $J = 10.8, 3.4$  Hz, 2H), 6.65 (dt,  $J = 9.9, 3.5$  Hz, 2H), 3.74 (s, 3H), 3.24 (s, 2H);  $^{13}\text{C NMR}$  (151 MHz,  $\text{CDCl}_3$ )  $\delta$  152.75, 139.81, 116.35, 114.73, 55.66.<sup>[19]</sup>

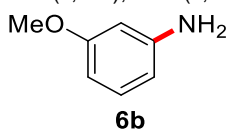

**3-Methoxybenzenamine (6b):** Brown oil;  $^1\text{H NMR}$  (600 MHz,  $\text{CDCl}_3$ )  $\delta$  7.05 (t,  $J = 7.8$  Hz, 1H), 6.32 (dd,  $J = 8.2, 2.2$  Hz, 1H), 6.27 (dd,  $J = 8.0, 2.0$  Hz, 1H), 6.23 (q,  $J = 2.2$  Hz, 1H), 3.74 (s, 3H), 3.64 (s, 2H);  $^{13}\text{C NMR}$  (151 MHz,  $\text{CDCl}_3$ )  $\delta$  160.69, 147.73, 130.04, 107.86, 103.88, 101.01, 55.01.<sup>[19]</sup>

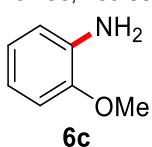

**2-Methoxybenzenamine (6c):** Brown oil;  $^1\text{H NMR}$  (600 MHz,  $\text{CDCl}_3$ )  $\delta$  6.80-6.76 (m, 2H), 6.75-6.69 (m, 2H), 3.83 (s, 3H), 3.70 (s, 2H);  $^{13}\text{C NMR}$  (151 MHz,  $\text{CDCl}_3$ )  $\delta$  147.27, 136.08, 121.02, 118.41, 114.98, 110.39, 55.36.<sup>[20]</sup>

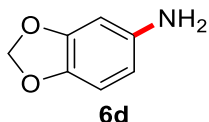

**1,3-Benzodioxol-5-amine (6d):** Grey solid;  $^1\text{H NMR}$  (400 MHz,  $\text{CDCl}_3$ )  $\delta$  6.62 (d,  $J = 8.1$  Hz, 1H), 6.28 (d,  $J = 2.2$  Hz, 1H), 6.12 (d,  $J = 8.1$  Hz, 1H), 5.86 (s, 2H), 3.34 (s, 2H);  $^{13}\text{C NMR}$  (151 MHz,  $\text{CDCl}_3$ )  $\delta$  148.13, 141.24, 140.30, 108.48, 106.80, 100.57, 97.99.<sup>[21]</sup>

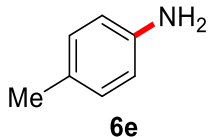

**4-Methylaniline (6e):** White solid;  $^1\text{H NMR}$  (600 MHz,  $\text{CDCl}_3$ )  $\delta$  6.96 (dd,  $J = 8.2, 2.3$  Hz, 2H), 6.59 (dd,  $J = 8.2, 1.7$  Hz, 2H), 3.50 (s, 2H), 2.24 (s, 3H);  $^{13}\text{C NMR}$  (151 MHz,  $\text{CDCl}_3$ )  $\delta$  143.72, 129.67, 127.71, 115.18, 20.38.<sup>[19]</sup>

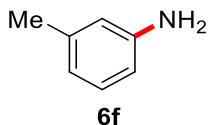

**3-Methylaniline (6f):** Brown oil;  $^1\text{H NMR}$  (400 MHz,  $\text{CDCl}_3$ )  $\delta$  7.04 (t,  $J = 7.6$  Hz, 1H), 6.58 (m, 1H), 6.59-6.56 (m, 2H), 3.51 (s, 2H), 2.26 (s, 3H);  $^{13}\text{C NMR}$  (151 MHz,  $\text{CDCl}_3$ )  $\delta$  146.26, 139.05, 129.10, 119.40, 115.87, 112.20, 21.38.<sup>[22]</sup>

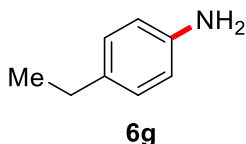

**4-Ethylaniline (6g):** Brown oil;  $^1\text{H NMR}$  (600 MHz,  $\text{CDCl}_3$ )  $\delta$  6.98 (d,  $J = 8.0$  Hz, 2H), 6.62 (d,  $J = 8.1$  Hz, 2H), 3.52 (s, 2H), 2.53 (q,  $J = 7.6$  Hz, 2H), 1.18 (t,  $J = 7.6$  Hz, 3H);  $^{13}\text{C NMR}$  (151 MHz,  $\text{CDCl}_3$ )  $\delta$  144.04, 134.51, 128.62, 115.32, 28.02, 15.99.<sup>[23]</sup>

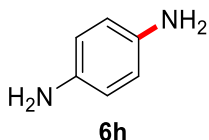

**p-Phenylenediamine (6h):** Brown white;  $^1\text{H NMR}$  (600 MHz,  $\text{CDCl}_3$ )  $\delta$  6.56 (s, 4H), 3.32 (s, 4H);  $^{13}\text{C NMR}$  (151 MHz,  $\text{CDCl}_3$ )  $\delta$  138.60, 116.72.<sup>[24]</sup>

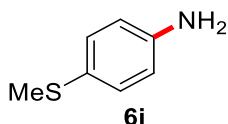

**4-(Methylthio)aniline (6i):** Brown oil;  $^1\text{H NMR}$  (600 MHz,  $\text{CDCl}_3$ )  $\delta$  7.17 (dt,  $J = 9.6, 3.2$  Hz, 2H), 6.61 (dd,  $J = 8.4, 2.1$  Hz, 2H), 3.61 (s, 2H), 2.40 (s, 3H);  $^{13}\text{C NMR}$  (151 MHz,  $\text{CDCl}_3$ )  $\delta$  145.14, 131.09, 125.79, 115.76, 18.82.<sup>[21]</sup>

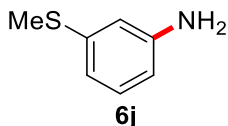

**3-(Methylthio)aniline (6j):** Brown oil;  $^1\text{H NMR}$  (600 MHz,  $\text{CDCl}_3$ )  $\delta$  7.06 (t,  $J = 7.8$  Hz, 1H), 6.65 (ddd,  $J = 7.7, 1.8, 0.9$  Hz, 1H), 6.57 (t,  $J = 2.0$  Hz, 1H), 6.45 (ddd,  $J = 7.9, 2.2, 1.0$  Hz, 1H), 3.65 (s, 2H), 2.44 (s, 3H);  $^{13}\text{C NMR}$  (151 MHz,  $\text{CDCl}_3$ )  $\delta$  146.69, 139.28, 129.57, 116.62, 112.85, 112.04, 15.59.<sup>[25]</sup>

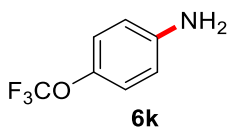

**4-(Trifluoromethoxy)aniline (6k):** Yellowish oil;  $^1\text{H NMR}$  (600 MHz,  $\text{CDCl}_3$ )  $\delta$  7.00 (d,  $J = 8.4$  Hz, 2H), 6.62 (dt,  $J = 10.1, 3.7$  Hz, 2H), 3.68 (s, 2H);  $^{13}\text{C NMR}$  (151 MHz,  $\text{CDCl}_3$ )  $\delta$  145.23, 141.31, 132.91, 122.40, 115.47.<sup>[26]</sup>

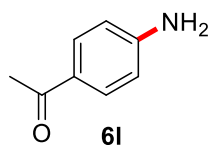

**4-Aminoacetophenone (6l):** White solid;  $^1\text{H}$  NMR (600 MHz,  $\text{CDCl}_3$ )  $\delta$  7.81 (d,  $J = 8.5$  Hz, 1H), 6.65 (dd,  $J = 8.4, 3.0$  Hz, 1H), 4.12 (s, 1H), 2.51 (s, 1H);  $^{13}\text{C}$  NMR (151 MHz,  $\text{CDCl}_3$ )  $\delta$  196.33, 150.94, 130.70, 127.87, 113.63, 26.00.<sup>[23]</sup>

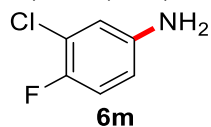

**3-Chloro-4-fluoroaniline (6m):** White solid; m.p. 43-44 °C;  $^1\text{H}$  NMR (600 MHz,  $\text{CDCl}_3$ )  $\delta$  6.91 (t,  $J = 8.8$  Hz, 1H), 6.69 (dd,  $J = 6.1, 2.8$  Hz, 1H), 6.50-6.48 (m, 1H), 3.58 (s, 2H);  $^{13}\text{C}$  NMR (151 MHz,  $\text{CDCl}_3$ )  $\delta$  152.31, 150.73, 143.03, 143.02, 120.94, 120.81, 116.82, 116.68, 116.31, 114.18, 114.13.<sup>[27]</sup>

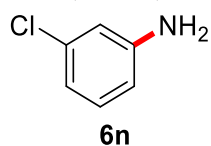

**3-Chloroaniline (6n):** Brown oil;  $^1\text{H}$  NMR (600 MHz,  $\text{CDCl}_3$ )  $\delta$  7.04 (t,  $J = 8.0$  Hz, 1H), 6.71 (dd,  $J = 7.9, 1.9$  Hz, 1H), 6.65 (s, 1H), 6.55-6.50 (m, 1H), 3.67 (s, 2H);  $^{13}\text{C}$  NMR (151 MHz,  $\text{CDCl}_3$ )  $\delta$  147.57, 134.76, 130.25, 118.37, 114.85, 113.12.<sup>[23]</sup>

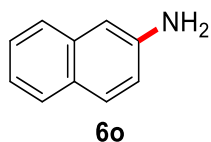

**2-Naphthylamine (6o):** Brown solid;  $^1\text{H}$  NMR (400 MHz,  $\text{DMSO}-d_6$ )  $\delta$  7.61 (dd,  $J = 8.2, 1.1$  Hz, 1H), 7.58 (d,  $J = 8.7$  Hz, 1H), 7.49 (dd,  $J = 8.3, 1.0$  Hz, 1H), 7.26 (ddd,  $J = 8.2, 6.7, 1.3$  Hz, 1H), 7.08 (ddd,  $J = 8.0, 6.7, 1.2$  Hz, 1H), 6.93 (dd,  $J = 8.7, 2.2$  Hz, 1H), 6.81 (d,  $J = 2.2$  Hz, 1H), 5.37 (s, 2H);  $^{13}\text{C}$  NMR (151 MHz,  $\text{CDCl}_3$ )  $\delta$  144.10, 134.92, 129.22, 127.98, 127.72, 126.35, 125.80, 122.48, 118.23, 108.60.<sup>[20]</sup>

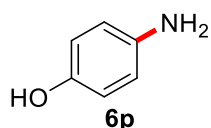

**4-Aminophenol (6p):** White solid;  $^1\text{H}$  NMR (600 MHz,  $\text{DMSO}-d_6$ )  $\delta$  8.32 (s, 1H), 6.47 (dt,  $J = 8.4, 1.4$  Hz, 2H), 6.41 (dt,  $J = 8.4, 1.4$  Hz, 2H), 4.36 (s, 2H);  $^{13}\text{C}$  NMR (151 MHz,  $\text{DMSO}-d_6$ )  $\delta$  148.57, 141.01, 115.90, 115.59, 40.42.<sup>[19]</sup>

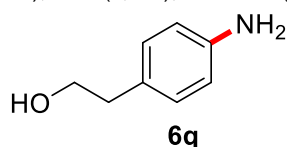

**4-Aminobenzyl alcohol (6q):** Yellowish solid;  $^1\text{H}$  NMR (400 MHz,  $\text{CDCl}_3$ )  $\delta$  6.84 (dt,  $J = 9.0, 2.8$  Hz, 2H), 6.46 (dt,  $J = 9.0, 2.8$  Hz, 2H), 4.79 (s, 2H), 4.49 (t,  $J = 5.3$  Hz, 1H), 3.48 (td,  $J = 7.4, 5.2$  Hz, 2H), 2.53 (t,  $J = 7.4$  Hz, 2H);  $^{13}\text{C}$  NMR (151 MHz,  $\text{CDCl}_3$ )  $\delta$  144.76, 129.78, 128.14, 115.34, 63.82, 38.24.<sup>[28]</sup>

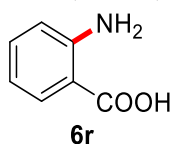

**2-Aminobenzoic acid (6r):** White solid;  $^1\text{H}$  NMR (400 MHz,  $\text{CDCl}_3$ )  $\delta$  7.65-7.60 (m 2H), 7.38 (td,  $J = 7.5, 1.2$  Hz, 1H), 7.30 (td,  $J = 7.7, 1.8$  Hz, 1H), 6.14 (s, 2H);  $^{13}\text{C}$  NMR (151 MHz,  $\text{CDCl}_3$ )  $\delta$  169.06, 136.52, 133.49, 131.60, 129.87, 127.52, 119.10, 109.89.<sup>[24]</sup>

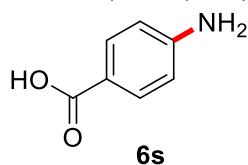

**4-Aminobenzoic acid (6s):** White solid;  $^1\text{H}$  NMR (600 MHz,  $\text{DMSO-}d_6$ )  $\delta$  11.94 (s, 1H), 7.61 (d,  $J = 8.3$  Hz, 2H), 6.54 (d,  $J = 8.3$  Hz, 2H), 5.86 (s, 2H);  $^{13}\text{C}$  NMR (151 MHz,  $\text{DMSO-}d_6$ )  $\delta$  167.84, 153.50, 131.57, 117.23, 112.91, 40.44.<sup>[22]</sup>

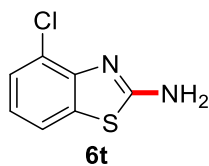

**2-Amino-4-chlorobenzothiazole (6t):** White solid;  $^1\text{H}$  NMR (600 MHz,  $\text{DMSO-}d_6$ )  $\delta$  7.83 (s, 2H), 7.62 (d,  $J = 7.7$  Hz, 1H), 7.28 (d,  $J = 7.9$  Hz, 1H), 6.99 (td,  $J = 7.9, 1.3$  Hz, 1H);  $^{13}\text{C}$  NMR (151 MHz,  $\text{DMSO-}d_6$ )  $\delta$  167.68, 149.82, 132.52, 125.92, 121.83, 121.63, 120.21.<sup>[29]</sup>

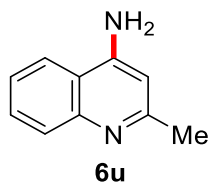

**4-Amino-2-methylquinoline (6u):** White solid;  $^1\text{H}$  NMR (600 MHz,  $\text{DMSO-}d_6$ )  $\delta$  8.08 (d,  $J = 8.3$  Hz, 1H), 7.66 (d,  $J = 8.3$  Hz, 1H), 7.54 (dd,  $J = 8.4, 6.8$  Hz, 1H), 7.30 (dd,  $J = 8.3, 6.8$  Hz, 1H), 6.63 (s, 2H), 6.43 (s, 1H), 2.41 (s, 3H);  $^{13}\text{C}$  NMR (151 MHz,  $\text{DMSO-}d_6$ )  $\delta$  158.57, 151.84, 148.84, 129.12, 128.49, 123.08, 122.43, 117.63, 102.36, 25.23.<sup>[30]</sup>

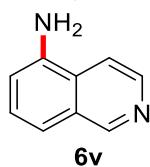

**5-Aminoisoquinoline (6v):** Yellow solid;  $^1\text{H}$  NMR (600 MHz,  $\text{CDCl}_3$ )  $\delta$  9.18 (s, 1H), 8.49 (d,  $J = 6.0$  Hz, 1H), 7.58 (d,  $J = 6.0$  Hz, 1H), 7.41 (d,  $J = 4.3$  Hz, 2H), 6.96 (t,  $J = 4.3$  Hz, 1H), 4.19 (s, 2H);  $^{13}\text{C}$  NMR (151 MHz,  $\text{CDCl}_3$ )  $\delta$  152.92, 141.96, 141.30, 129.41, 127.80, 126.01, 118.01, 114.08, 113.11.

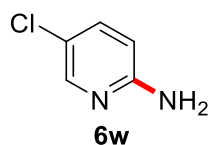

**2-Amino-5-chloropyridine (6w):** White solid;  $^1\text{H}$  NMR (600 MHz,  $\text{CDCl}_3$ )  $\delta$  8.01 (d,  $J = 2.5$  Hz, 1H), 7.37 (dd,  $J = 8.7, 2.6$  Hz, 1H), 6.45 (d,  $J = 8.7$  Hz, 1H), 4.56 (s, 2H);  $^{13}\text{C}$  NMR (151 MHz,  $\text{CDCl}_3$ )  $\delta$  156.71, 146.30, 137.45, 120.84, 109.33.<sup>[31]</sup>

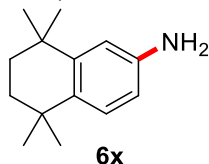

**5,6,7,8-Tetrahydro-5,5,8,8-tetramethyl-2-naphthylamine (6x):** White solid;  $^1\text{H}$  NMR (600 MHz,  $\text{CDCl}_3$ )  $\delta$  7.12 (d,  $J = 8.3$  Hz, 1H), 6.70 (d,  $J = 2.5$  Hz, 1H), 6.58 (dd,  $J = 8.3, 2.5$  Hz, 1H), 4.25 (s, 2H), 1.65 (s, 4H), 1.25 (s, 6H), 1.23 (s, 6H);  $^{13}\text{C}$  NMR (151 MHz,  $\text{CDCl}_3$ )  $\delta$  145.84, 143.67, 135.37, 127.40, 113.65, 112.89, 35.30, 34.24, 33.58, 32.06, 31.86.<sup>[32]</sup>

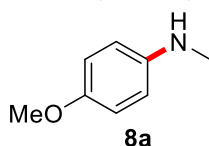

**4-Methoxy-N-methylaniline (8a):** White solid;  $^1\text{H}$  NMR (400 MHz,  $\text{CDCl}_3$ )  $\delta$  6.80 (dt,  $J = 10.3, 3.6$  Hz, 2H), 6.78 (dt,  $J = 10.2, 3.7$  Hz, 2H), 3.74 (s, 3H), 3.30 (s, 1H), 2.79 (s, 3H);  $^{13}\text{C}$  NMR (101 MHz,  $\text{CDCl}_3$ )  $\delta$  152.16, 143.64, 114.95, 113.72, 55.88, 31.67.<sup>[33]</sup>

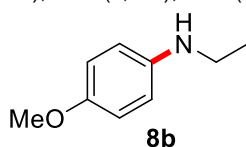

**N-Ethyl-4-methoxyaniline (8b):** Brown oil;  $^1\text{H NMR}$  (400 MHz,  $\text{CDCl}_3$ )  $\delta$  6.78 (dt,  $J = 10.2, 3.6$  Hz, 2H), 6.58 (dt,  $J = 10.2, 3.6$  Hz, 2H), 3.74 (s, 3H), 3.21 (s, 1H), 3.10 (q,  $J = 7.1$  Hz, 2H), 1.23 (t,  $J = 7.1$  Hz, 3H);  $^{13}\text{C NMR}$  (101 MHz,  $\text{CDCl}_3$ )  $\delta$  152.17, 142.64, 114.93, 114.24, 55.84, 39.56, 14.97.<sup>[34]</sup>

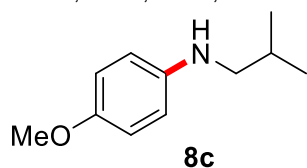

**N-(isobutyl)-4-methoxyaniline (8c):** Yellowish oil;  $^1\text{H NMR}$  (400 MHz,  $\text{CDCl}_3$ )  $\delta$  6.76 (dt,  $J = 10.2, 3.6$  Hz, 2H), 6.57 (dt,  $J = 10.2, 3.7$  Hz, 2H), 3.73 (s, 3H), 3.50 (s, 1H), 2.88 (d,  $J = 6.8$  Hz, 2H), 1.91-1.82 (m, 1H), 0.97 (d,  $J = 6.7$  Hz, 6H);  $^{13}\text{C NMR}$  (101 MHz,  $\text{CDCl}_3$ )  $\delta$  151.95, 142.83, 114.95, 114.04, 55.87, 52.96, 28.06, 20.54.<sup>[35]</sup>

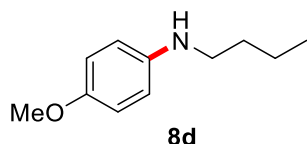

**N-Butyl-4-methoxyaniline (8d):** Yellow oil;  $^1\text{H NMR}$  (400 MHz,  $\text{CDCl}_3$ )  $\delta$  6.77 (dt,  $J = 10.2, 3.6$  Hz, 2H), 6.58 (dt,  $J = 10.2, 3.7$  Hz, 2H), 3.74 (s, 3H), 3.39 (s, 1H), 3.06 (t,  $J = 7.1$  Hz, 2H), 1.63-1.55 (m, 2H), 1.46-1.37 (m, 2H), 0.95 (t,  $J = 7.3$  Hz, 3H);  $^{13}\text{C NMR}$  (101 MHz,  $\text{CDCl}_3$ )  $\delta$  152.06, 142.72, 114.92, 114.14, 55.85, 44.82, 31.77, 20.34, 13.95.<sup>[36]</sup>

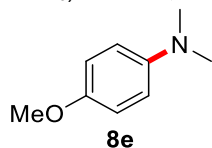

**4-Methoxy-N, N-dimethylaniline (8e):** Yellowish oil;  $^1\text{H NMR}$  (400 MHz,  $\text{CDCl}_3$ )  $\delta$  6.84 (dt,  $J = 10.2, 3.5$  Hz, 2H), 6.77 (dt,  $J = 10.3, 3.6$  Hz, 2H), 3.76 (s, 3H), 2.87 (s, 6H);  $^{13}\text{C NMR}$  (101 MHz,  $\text{CDCl}_3$ )  $\delta$  145.66, 115.06, 114.68, 55.78, 41.93.<sup>[36]</sup>

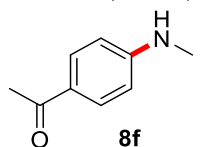

**1-(4-(Methylamino)phenyl)ethanone (8f):**  $^1\text{H NMR}$  (400 MHz,  $\text{CDCl}_3$ )  $\delta$  7.85 (dt,  $J = 9.5, 2.7$  Hz, 2H), 6.58 (dt,  $J = 9.6, 2.8$  Hz, 2H), 4.44 (s, 1H), 2.90 (s, 3H), 2.50 (s, 3H);  $^{13}\text{C NMR}$  (101 MHz,  $\text{CDCl}_3$ )  $\delta$  196.34, 152.93, 130.75, 126.79, 111.17, 30.19, 25.99.<sup>[37]</sup>

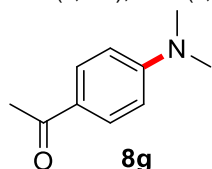

**1-(4-(Dimethylamino)phenyl)ethanone (8g):** Yellow solid;  $^1\text{H NMR}$  (600 MHz,  $\text{CDCl}_3$ )  $\delta$  7.86 (dt,  $J = 9.9, 3.1$  Hz, 2H), 6.66 (dt,  $J = 10.1, 3.1$  Hz, 2H), 3.06 (s, 6H), 2.51 (s, 3H);  $^{13}\text{C NMR}$  (151 MHz,  $\text{CDCl}_3$ )  $\delta$  196.37, 153.31, 130.52, 125.53, 110.71, 40.11, 26.00; ESI-MS ( $m/z$ ): 164.11 [ $\text{M}+\text{H}^+$ ].<sup>[38]</sup>

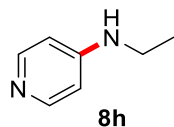

**N-propylpyridin-4-amine (8h):** Colorless oil;  $^1\text{H NMR}$  (600 MHz,  $\text{CDCl}_3$ )  $\delta$  8.16 (d,  $J = 5.3$  Hz, 2H), 6.44 (d,  $J = 5.5$  Hz, 2H), 4.48 (s, 1H), 3.25-3.14 (m, 2H), 1.27 (t,  $J = 7.2$  Hz, 3H);  $^{13}\text{C NMR}$  (151 MHz,  $\text{CDCl}_3$ )  $\delta$  153.61, 149.33, 107.46, 37.27, 14.39.<sup>[39]</sup>

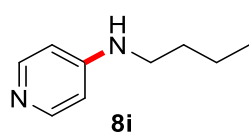

**N-isobutylpyridin-4-amine (8i):** Colorless oil;  $^1\text{H NMR}$  (600 MHz,  $\text{CDCl}_3$ )  $\delta$  8.17 (d,  $J = 5.5$  Hz, 2H), 6.42 (d,  $J = 5.9$  Hz, 2H), 4.33 (s, 1H), 3.14 (q,  $J = 7.0$  Hz, 2H), 1.60 (p,  $J = 7.3$  Hz, 2H), 1.42 (h,  $J = 7.4$  Hz, 2H), 0.96 (t,  $J = 7.4$  Hz, 3H);  $^{13}\text{C NMR}$  (151 MHz,  $\text{CDCl}_3$ )  $\delta$  153.51, 149.87, 107.44, 42.34, 31.20, 20.16, 13.80.<sup>[39]</sup>

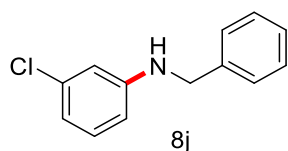

**(8j):** Colorless oil;  $^1\text{H NMR}$  (400 MHz,  $\text{CDCl}_3$ )  $\delta$  7.35 (d,  $J = 4.4$  Hz, 4H), 7.32-7.25 (m, 1H), 7.06 (t,  $J = 8.0$  Hz, 1H), 6.67 (ddd,  $J = 7.8, 1.9, 0.9$  Hz, 1H), 6.61 (t,  $J = 2.2$  Hz, 1H), 6.48 (ddd,  $J = 8.2, 2.4, 0.9$  Hz, 1H), 4.30 (s, 2H), 4.10 (s, 1H);  $^{13}\text{C NMR}$  (101 MHz,  $\text{CDCl}_3$ )  $\delta$  149.23, 138.75, 135.04, 130.22, 128.75, 127.48, 127.45, 117.43, 112.50, 111.14, 48.12.

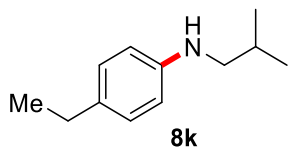

**4-Ethyl-N-isobutylaniline (8k):** Colorless oil;  $^1\text{H NMR}$  (400 MHz,  $\text{CDCl}_3$ )  $\delta$  7.01 (dt,  $J = 9.4, 3.0$  Hz, 2H), 6.56 (dt,  $J = 9.2, 3.0$  Hz, 2H), 3.96 (s, 1H), 2.91 (d,  $J = 6.8$  Hz, 2H), 2.53 (q,  $J = 7.6$  Hz, 2H), 1.91-1.83 (m, 1H), 1.18 (t,  $J = 7.6$  Hz, 3H), 0.97 (d,  $J = 6.7$  Hz, 6H);  $^{13}\text{C NMR}$  (101 MHz,  $\text{CDCl}_3$ )  $\delta$  146.21, 133.18, 128.54, 113.08, 52.42, 27.98, 27.93, 20.52, 15.98.<sup>40j</sup>

## 6. References

- [1] H. Kaddouri, V. Vicente, A. Ouali, F. Ouazzani, M. Taillefer, *Angew. Chem. Int. Ed.* 2009, **48**, 333-336.
- [2] Y. Liu, Y. Liu, X. Ma, P. Liu, J. Xie, B. Dai, *Chin Chem Lett.* 2014, **25**, 775-778.
- [3] K. Swapna, A. V. Kumar, V. P. Reddy, K. R. Rao, *J. Org. Chem.* 2009, **74**, 7514-7517.
- [4] H. J. Cristau, P. P. Cellier, J. F. Spindler, M. Taillefer, *Eur. J. Org. Chem.* 2004, 695-709.
- [5] Y. Wang, Y. Zhang, B. Yang, A. Zhang, Q. Yao, *Org. Biomol. Chem.* 2015, **13**, 4101-4114.
- [6] X. Wang, F. Meng, J. Zhang, J. Xie, B. Dai, *Catal. Letters.* 2018, **148**, 1142-1149.
- [7] A. Majumder, R. Gupta, M. Mandal, M. Babu, D. Chakraborty, *J. Organomet. Chem.* 2015, **781**, 23-34.
- [8] H. Huang, T. H. Lambert, *Angew. Chem. Int. Ed.* 2020, **59**, 658-662.
- [9] S. Ueda, M. Su, S. L. Buchwald, *J. Am. Chem. Soc.* 2012, **134**, 700-706.
- [10] W. Liu, J. Xu, X. Chen, F. Zhang, Z. Xu, D. Wang, Y. He, X. Xia, X. Zhang, Y. Liang, *Org. Lett.* 2020, **22**, 7486-7490.
- [11] Z. Zhang, Y. Xu, L. Shao, *J. Organomet. Chem.* 2021, **940**, 121683.
- [12] J. F. Campos, S. B. Raboin, *Catalysts.* 2019, **9**, 840.
- [13] C. Lim, M. Kudisch, B. Liu, G. M. Miyake, *J. Am. Chem. Soc.* 2018, **140**, 7667-7673.
- [14] R. Varala, E. Ramu, M. M. Alam, S. R. Adapa, *Synlett.* 2004, **10**, 1747-1750.
- [15] Y. Liu, D. Liang, L. Lu, W. Xiao, *Chem. Commun.* 2019, **55**, 4853-4856.
- [16] X. Ding, M. Huang, Z. Yi, D. Du, X. Zhu, Y. Wan, *J. Org. Chem.* 2017, **82**, 5416-5423.
- [17] M. Hepperle, J. Eckert, D. Gala, L. Shen, C. A. Evans, A. Goodman, *Tetrahedron Lett.* 2002, **43**, 3359-3363.
- [18] S. Bhunia, S. V. Kumar, D. Ma, *J. Org. Chem.* 2017, **82**, 12603-12612.
- [19] X. Zeng, W. Huang, Y. Qiu, S. Jiang, *Org. Biomol. Chem.* 2011, **9**, 8224-8227.
- [20] R. A. Green, J. F. Hartwig, *Angew. Chem. Int. Ed.* 2015, **54**, 3768-3772.
- [21] M. Fan, W. Zhou, Y. Jiang, D. Ma, *Org. Lett.* 2015, **17**, 5934-5937.
- [22] P. Ji, J. H. Atherton, M. I. Page, *J. Org. Chem.* 2012, **77**, 7471-7478.
- [23] M. Huang, L. Wang, X. Zhu, Z. Mao, D. Kuang, Y. Wan, *Eur. J. Org. Chem.* 2012, 4897-4901.
- [24] B. Yang, L. Liao, Y. Zeng, X. Zhu, Y. Wan, *Catal. Commun.* 2014, **45**, 100-103.
- [25] T. Schulz, C. Torborg, S. Enthaler, B. Schffner, A. Dumrath, A. Spannenberg, H. Neumann, A. Bcrner, M. Beller, *Chem. Eur. J.* 2009, **15**, 4528-4533.
- [26] H. Gao, Z. Zhou, D. Kwon, J. Coombs, S. Jones, N. E. Behnke, D. H. Ess, L. Kürti, *Nat. Chem.* 2017, **9**, 681-688.
- [27] Y. Guo, J. Li, F. Zhao, G. Lan, L. Li, Y. Liu, Y. Si, Y. Jiang, B. Yang, R. Yang, *RSC. Adv.* 2016, **6**, 7950-7954.
- [28] M. Noshita, Y. Shimizu, H. Morimoto, T. Ohshima, *Org. Lett.* 2016, **18**, 6062-6065.
- [29] L. Jin, R. Huang, X. Huang, B. Zhang, M. Ji, H. Wang, *Bioorg. Med. Chem.* 2018, **26**, 1759-1775.
- [30] N. E. Bodé, J. P. Tassone, M. J. Ferguson, M. Stradiotto, *Organometallics.* 2021, **40**, 2915-2922.
- [31] B. Misal, A. Palav, P. Ganwir, G. Chaturbuj, *Tetrahedron Lett.* 2021, **63**, 152689.

- [32] S. D. Friis, T. L. Andersen, T. Skrydstrup, *Org. Lett.* 2013, **15**, 1378-1381.
- [33] J. Jiao, X. Zhang, N. Chang, J. Wang, J. Wei, X. Shi, Z. Chen, *J. Org. Chem.* 2011, **76**, 1180-1183.
- [34] G. E. Benitez-Medina and J. J. García, *Dalton Trans.* 2019, **48**, 17579-17587.
- [35] Q. Shen, S. Shekhar, J. P. Stambuli, J. F. Hartwig, *Angew. Chem. Int. Ed.* 2005, **44**, 1371-1375.
- [36] A. E. Wahba, M. T. Hamann, *J. Org. Chem.* 2012, **77**, 4578-4585.
- [37] R. Liang, S. Li, R. Wang, L. Lu, F. Li, *Org. Lett.* 2017, **19**, 5790-5793.
- [38] S. Sueki, M. Matsuyama, A. Watanabe, A. Kanemaki, K. Katakawa, M. Anada, *Eur. J. Org. Chem.* 2020, 4878-4885.
- [39] Z. Wu, G. Yang, X. Zhao, J. Wu, S. Wu, *J. Heterocyclic Chem.* 2019, **56**, 234-238.
- [40] A. Banik, J. Ahmed, S. Sil, S. K. Mandal, *Chem. Sci.* 2021, **12**, 8353-8361.

## 7. Copies of $^1\text{H}$ and $^{13}\text{C}$ NMR spectrum of products

$^1\text{H}$  NMR Spectrum of **3a** (600 MHz,  $\text{CDCl}_3$ )

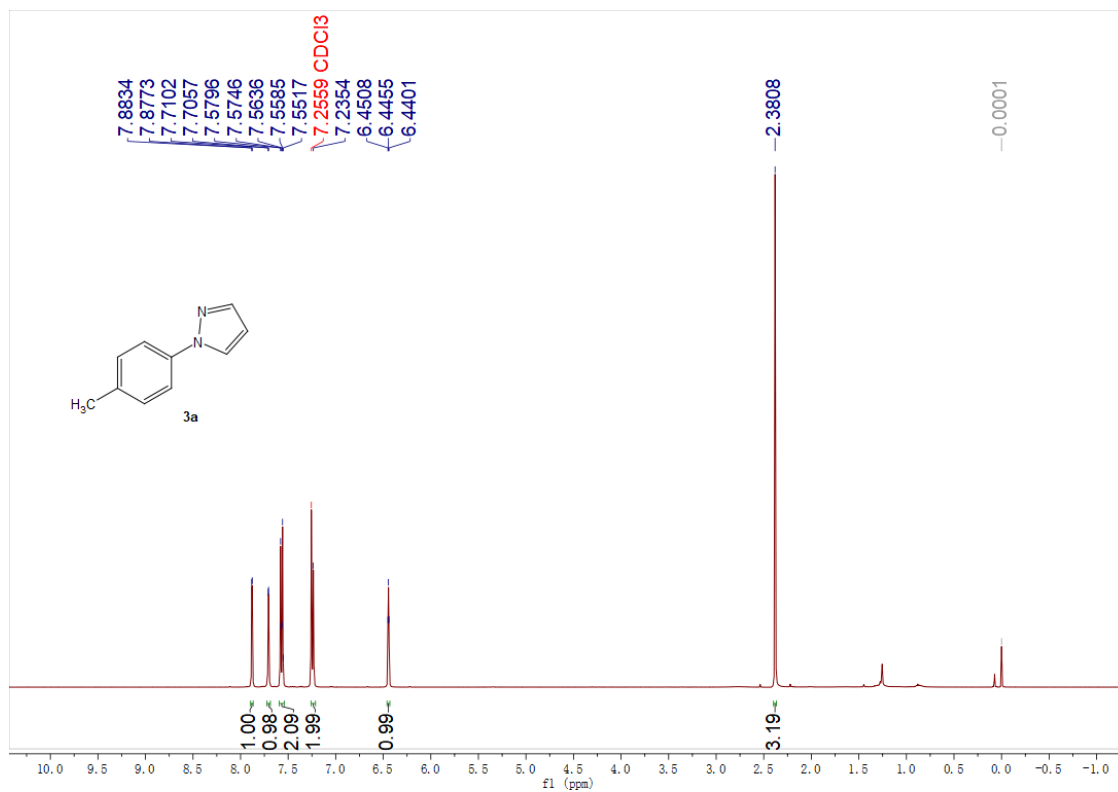

$^{13}\text{C}$  NMR Spectrum of **3a** (151 MHz,  $\text{CDCl}_3$ )

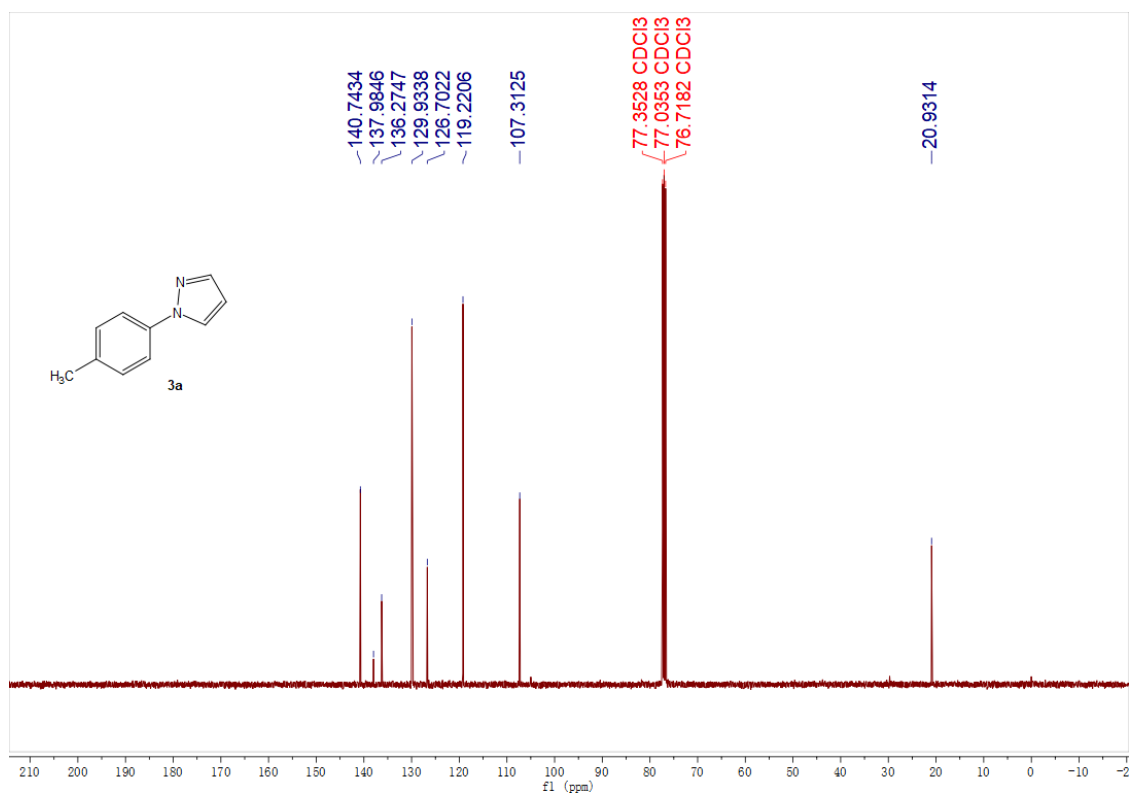



<sup>1</sup>H NMR Spectrum of **3b** (600 MHz, CDCl<sub>3</sub>)

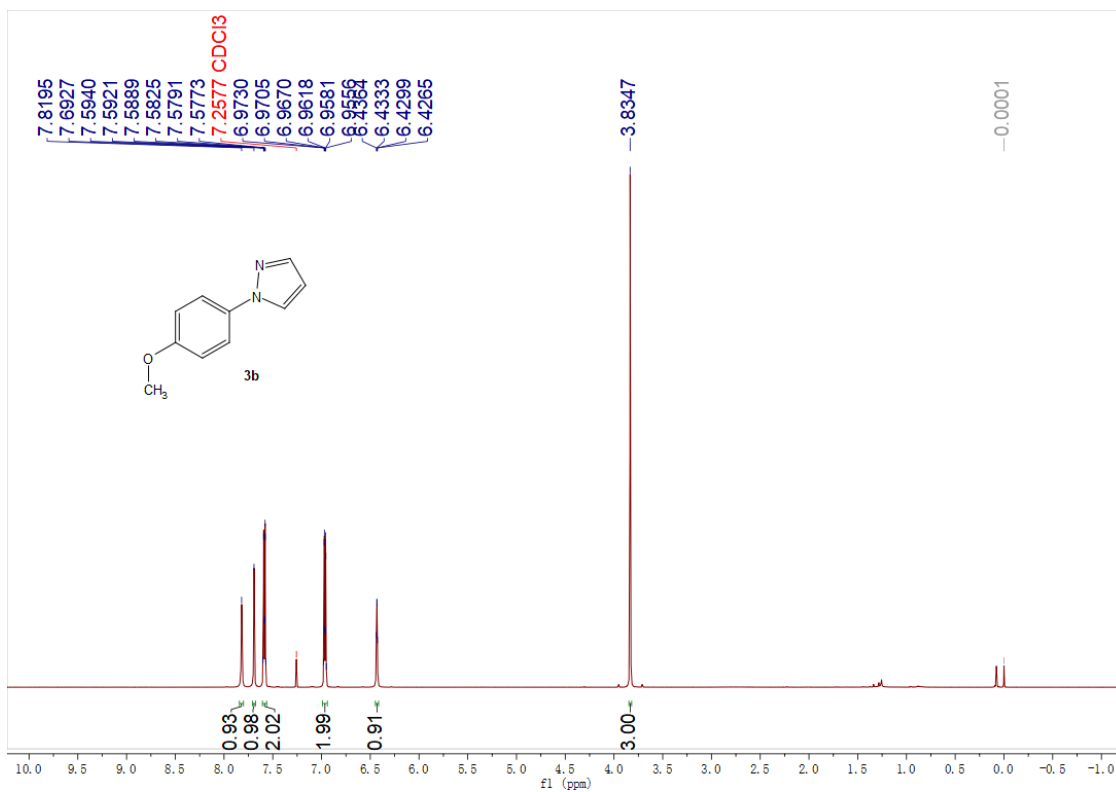

<sup>13</sup>C NMR Spectrum of **3b** (600 MHz, CDCl<sub>3</sub>)

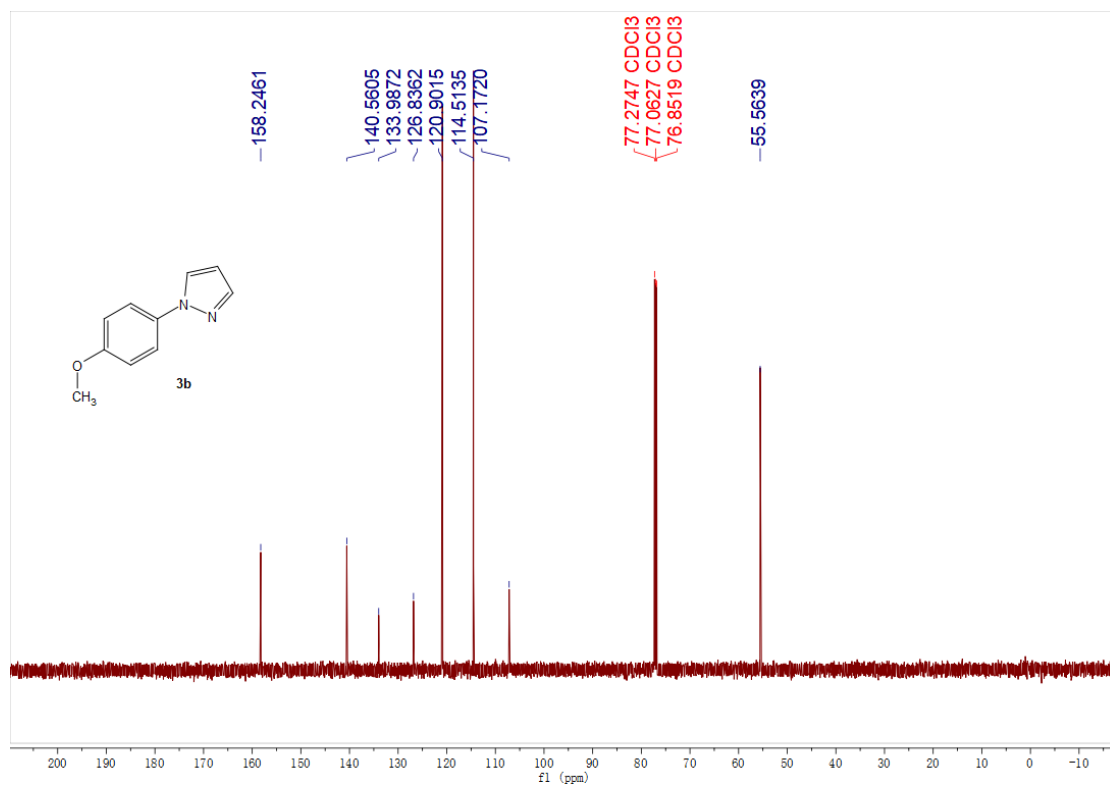

<sup>1</sup>H NMR Spectrum of **3c** (400 MHz, CDCl<sub>3</sub>)

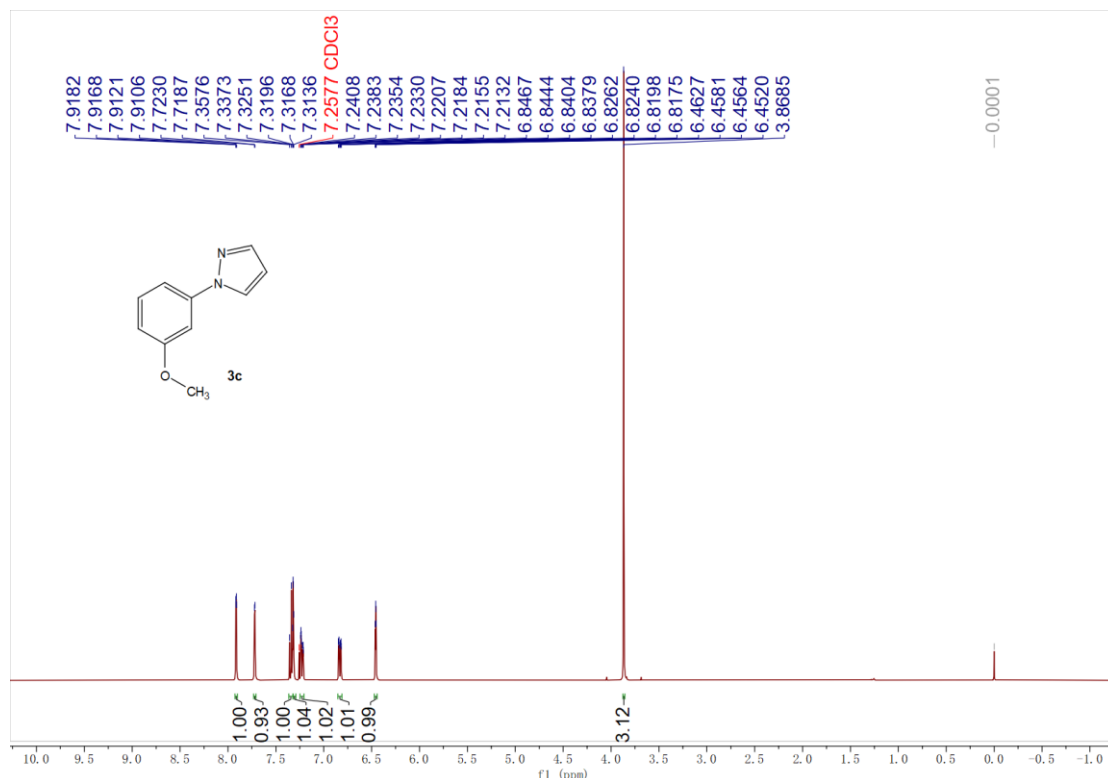

<sup>13</sup>C NMR Spectrum of **3c** (101 MHz, CDCl<sub>3</sub>)

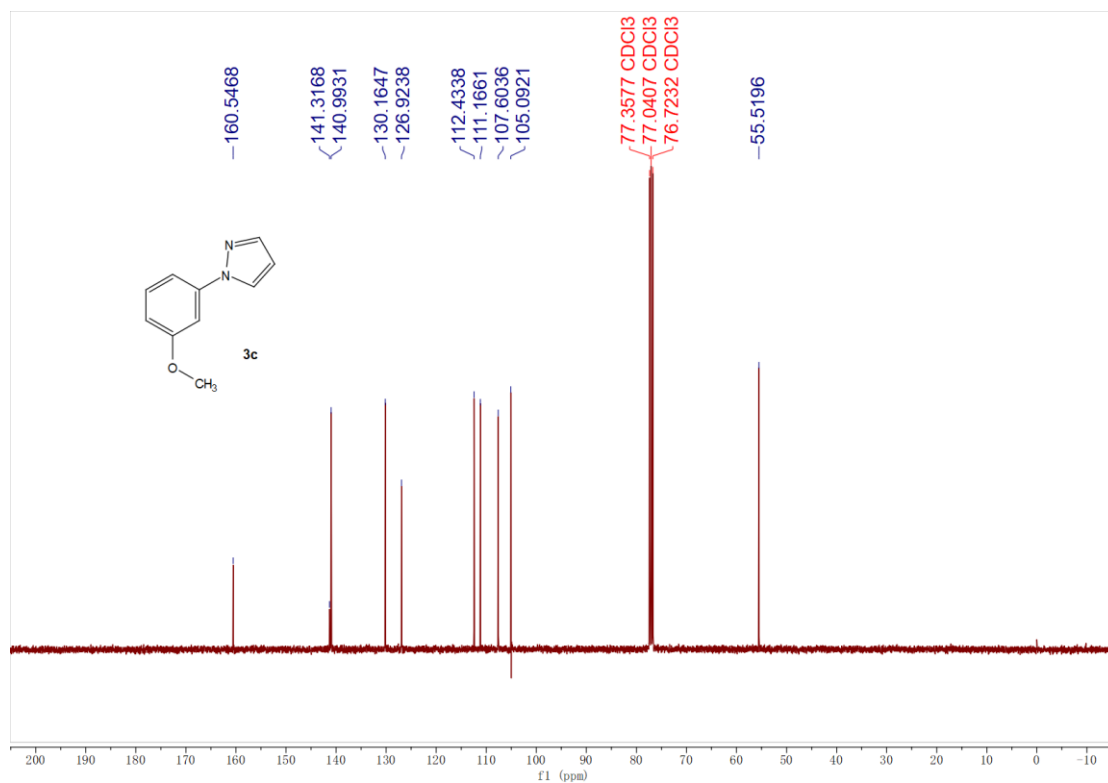

<sup>1</sup>H NMR Spectrum of **3d** (400 MHz, CDCl<sub>3</sub>)

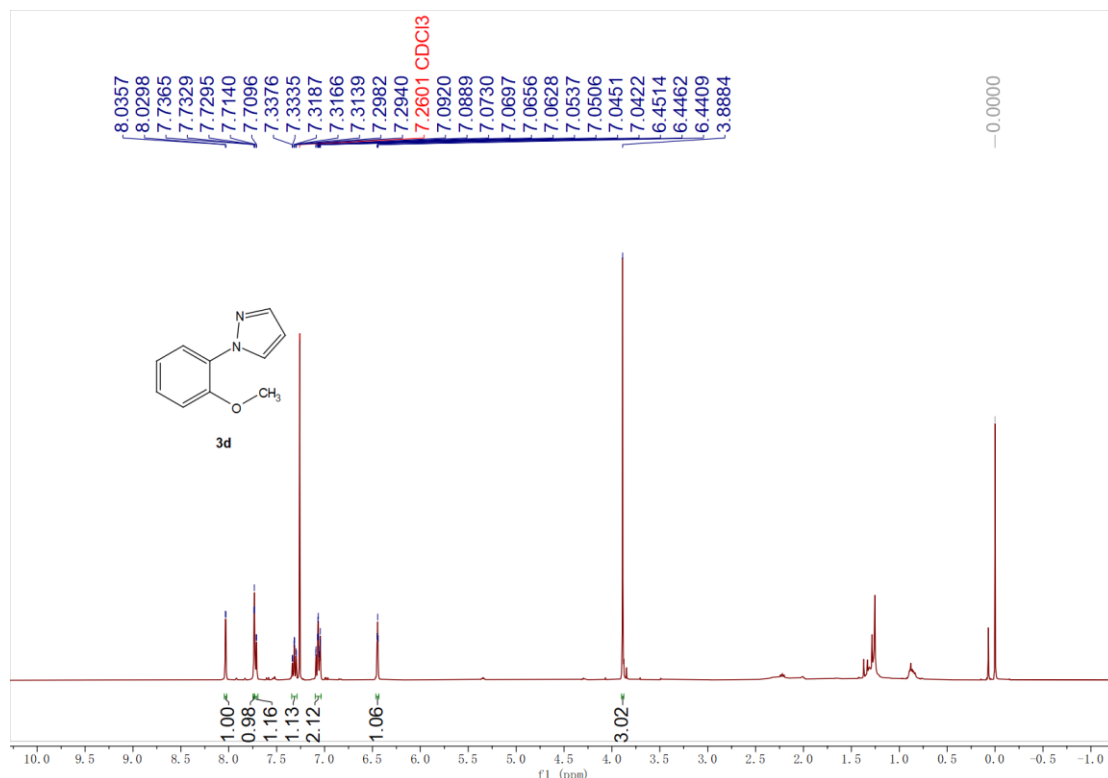

<sup>13</sup>C NMR Spectrum of **3d** (101 MHz, CDCl<sub>3</sub>)

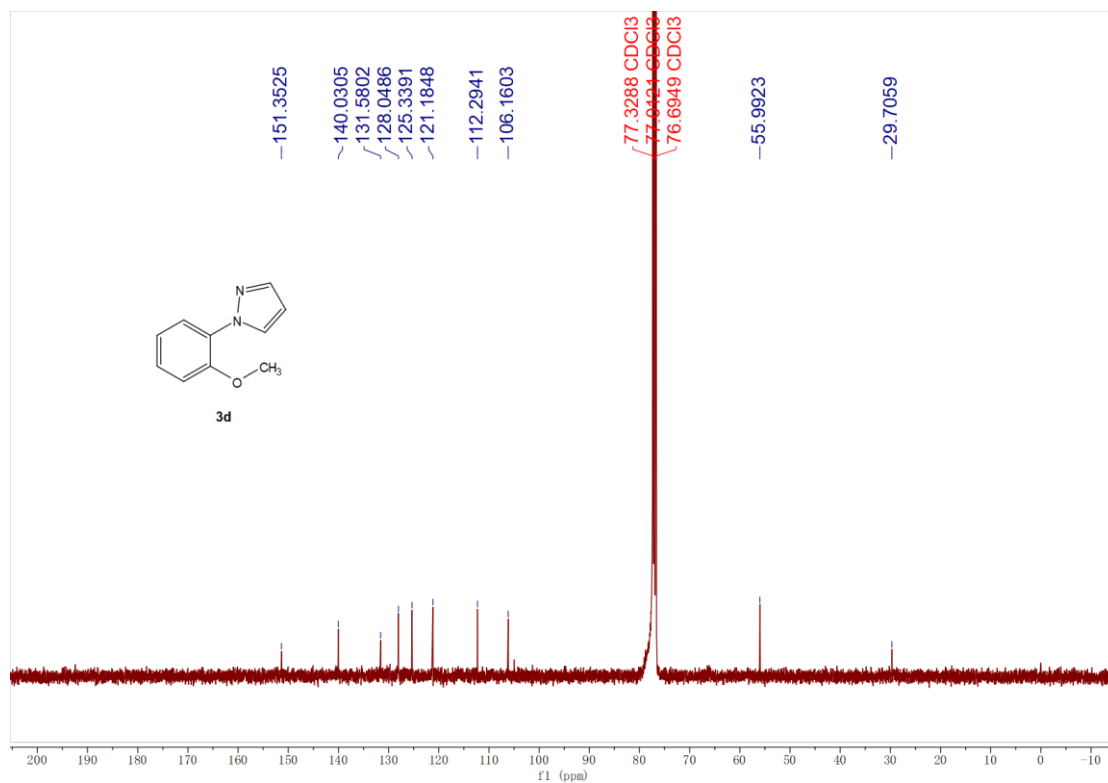

<sup>1</sup>H NMR Spectrum of **3e** (400 MHz, CDCl<sub>3</sub>)

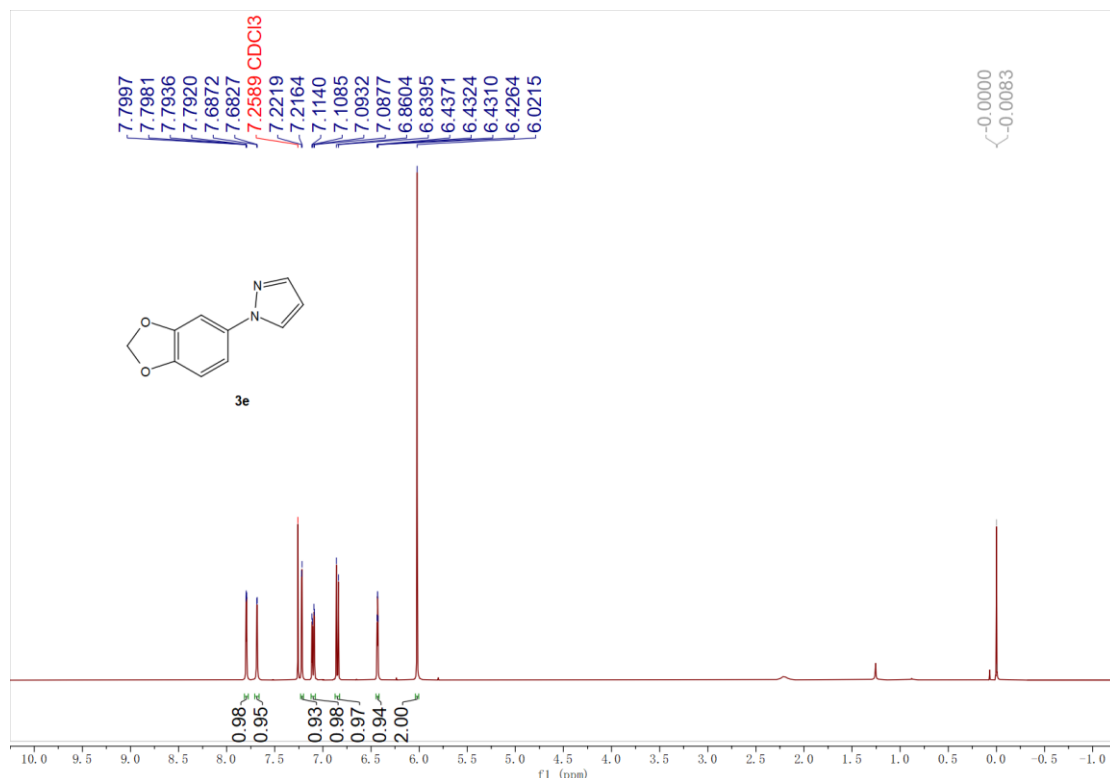

<sup>13</sup>C NMR Spectrum of **3e** (101 MHz, CDCl<sub>3</sub>)

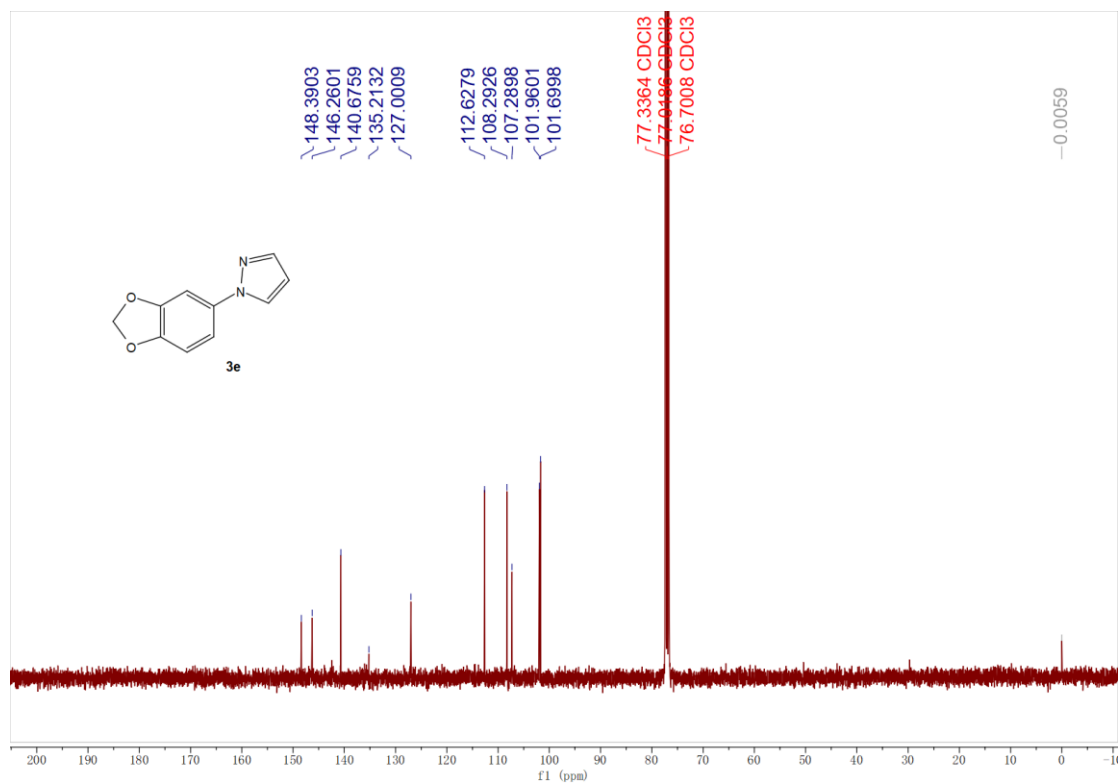

<sup>1</sup>H NMR Spectrum of **3f** (400 MHz, CDCl<sub>3</sub>)

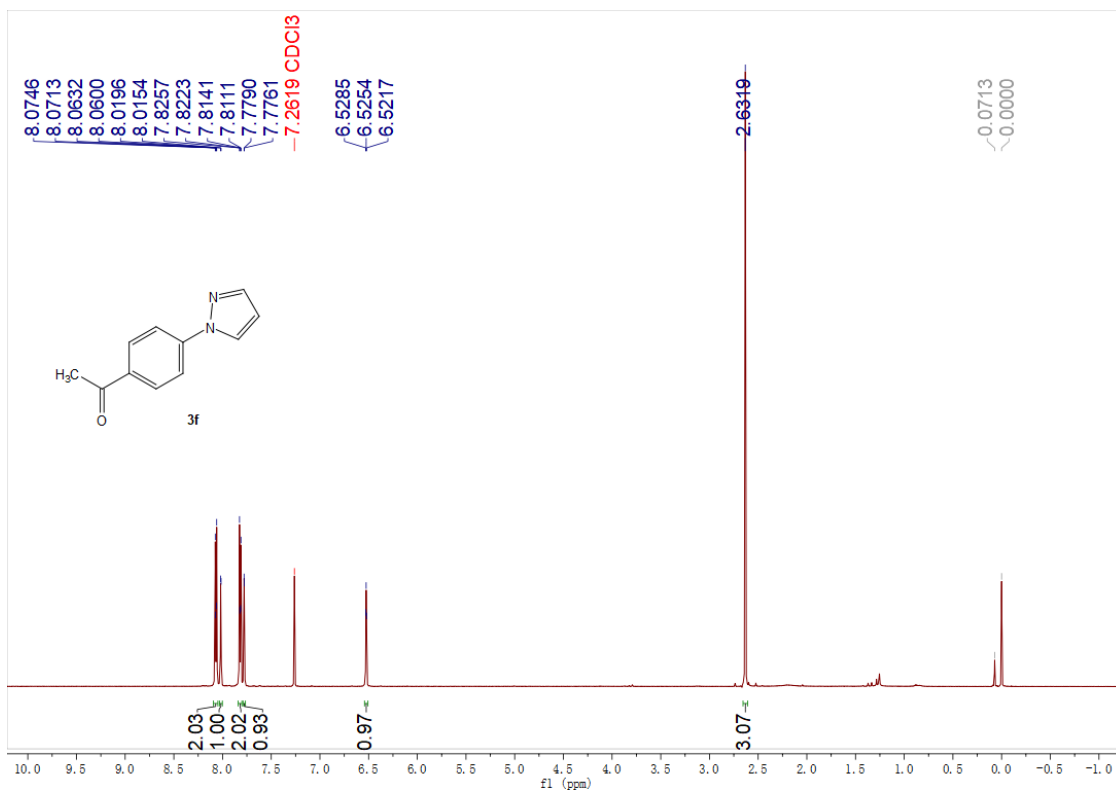

<sup>13</sup>C NMR Spectrum of **3f** (101 MHz, CDCl<sub>3</sub>)

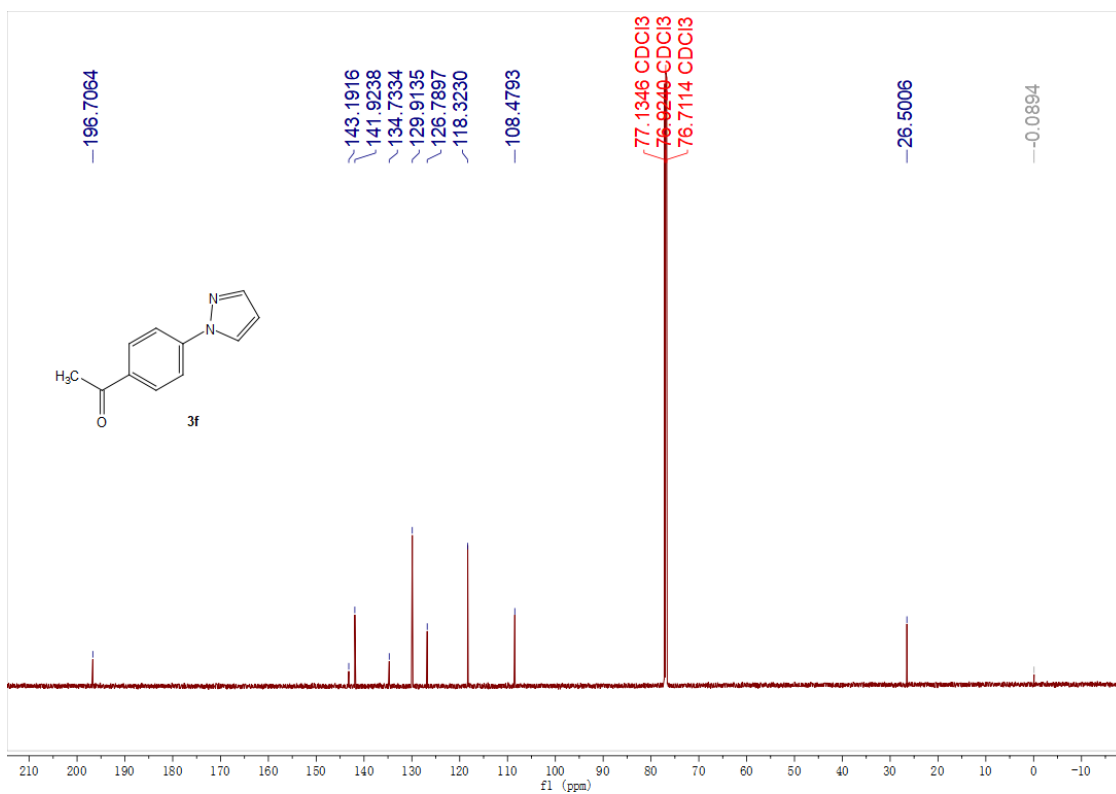

<sup>1</sup>H NMR Spectrum of **3g** (400 MHz, CDCl<sub>3</sub>)

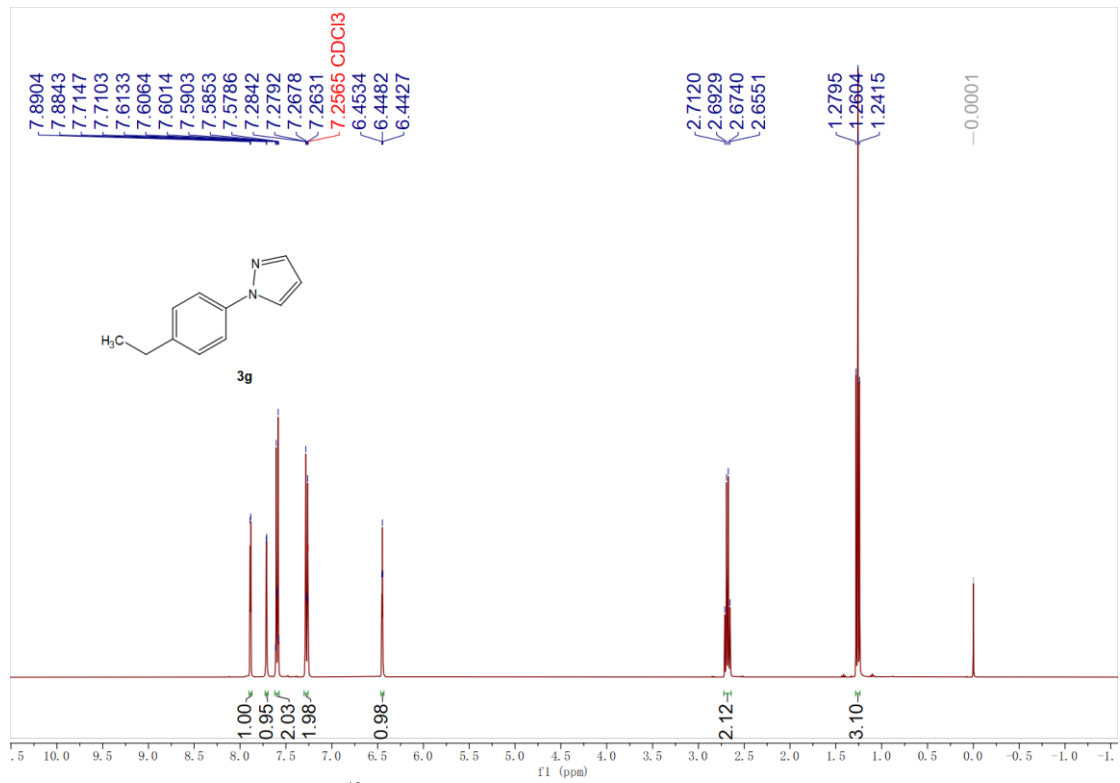

<sup>13</sup>C NMR Spectrum of **3g** (101 MHz, CDCl<sub>3</sub>)

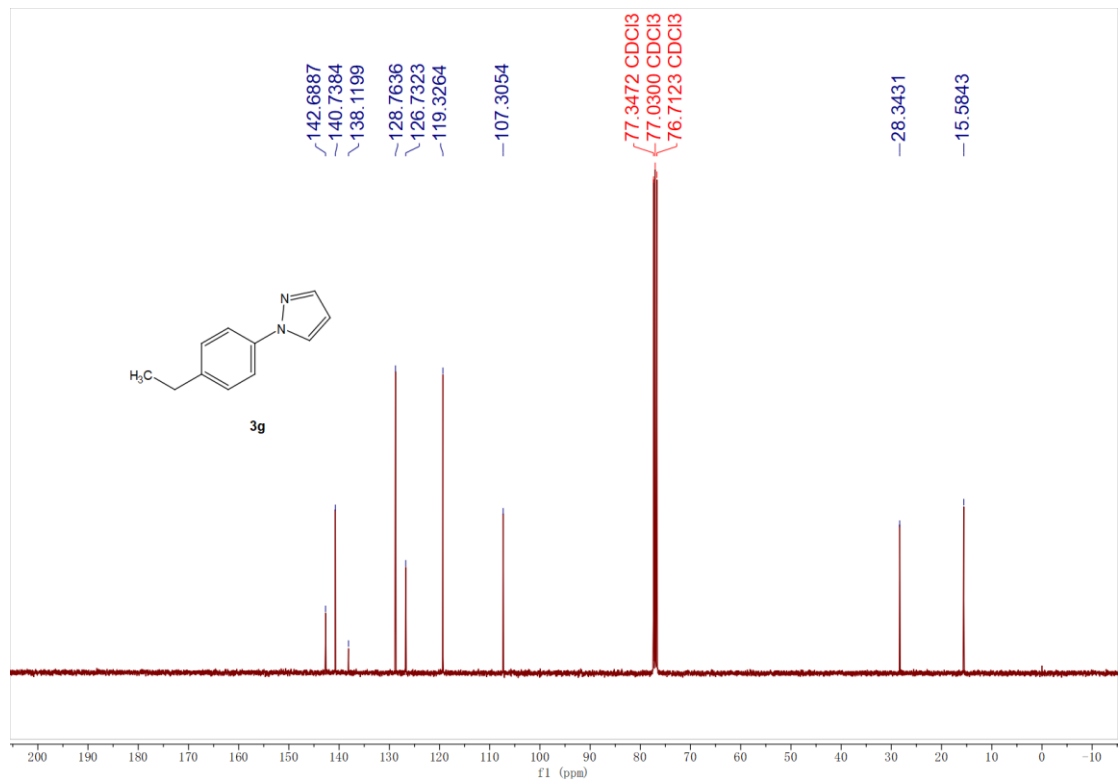

<sup>1</sup>H NMR Spectrum of **3h** (400 MHz, CDCl<sub>3</sub>)

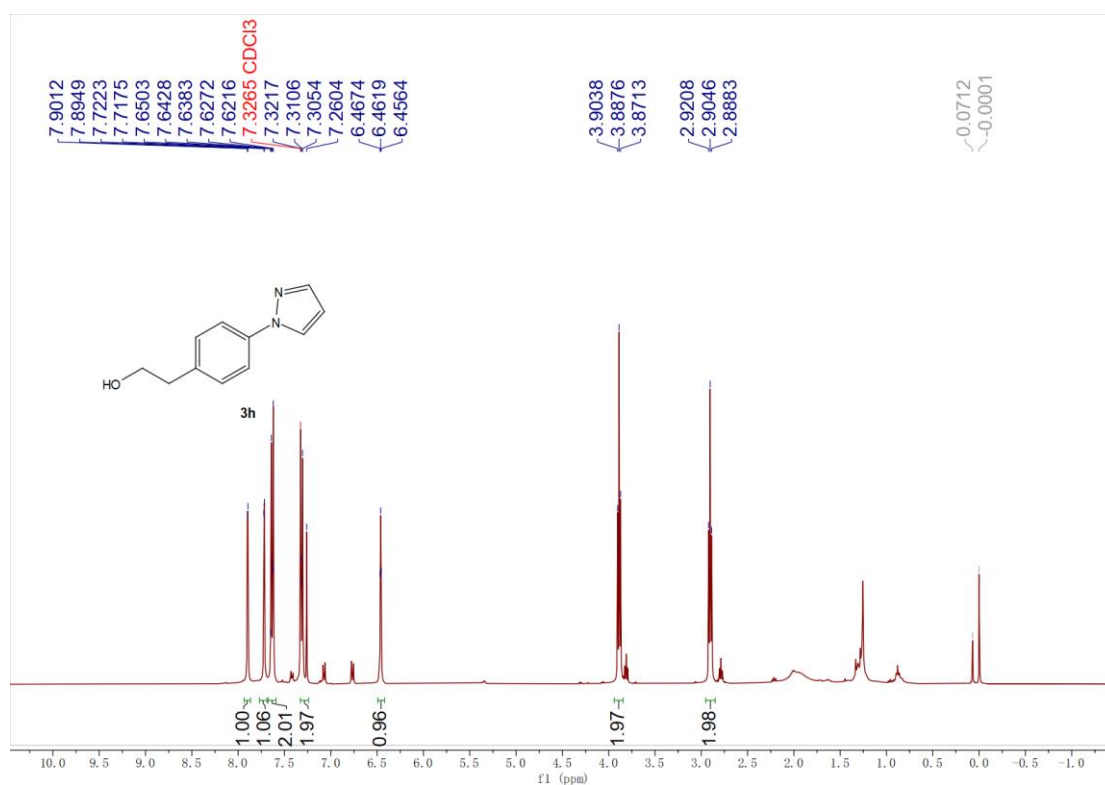

<sup>13</sup>C NMR Spectrum of **3h** (101 MHz, CDCl<sub>3</sub>)

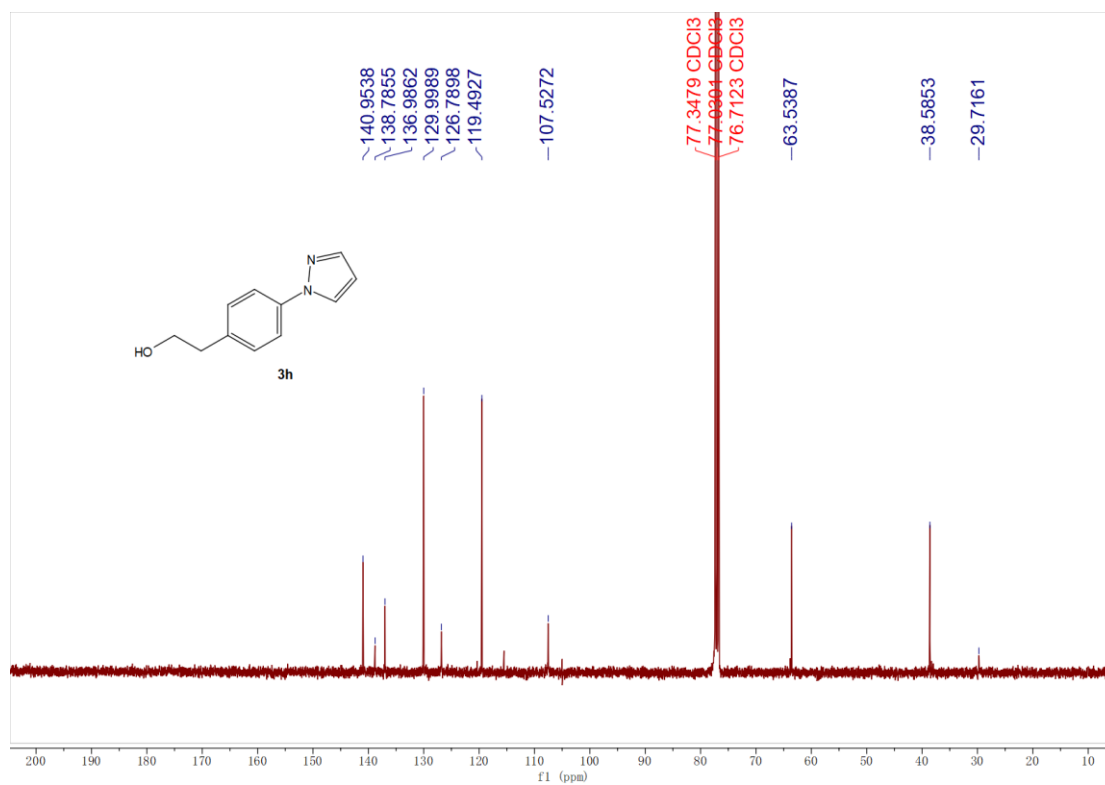

<sup>1</sup>H NMR Spectrum of **3i** (400 MHz, CDCl<sub>3</sub>)

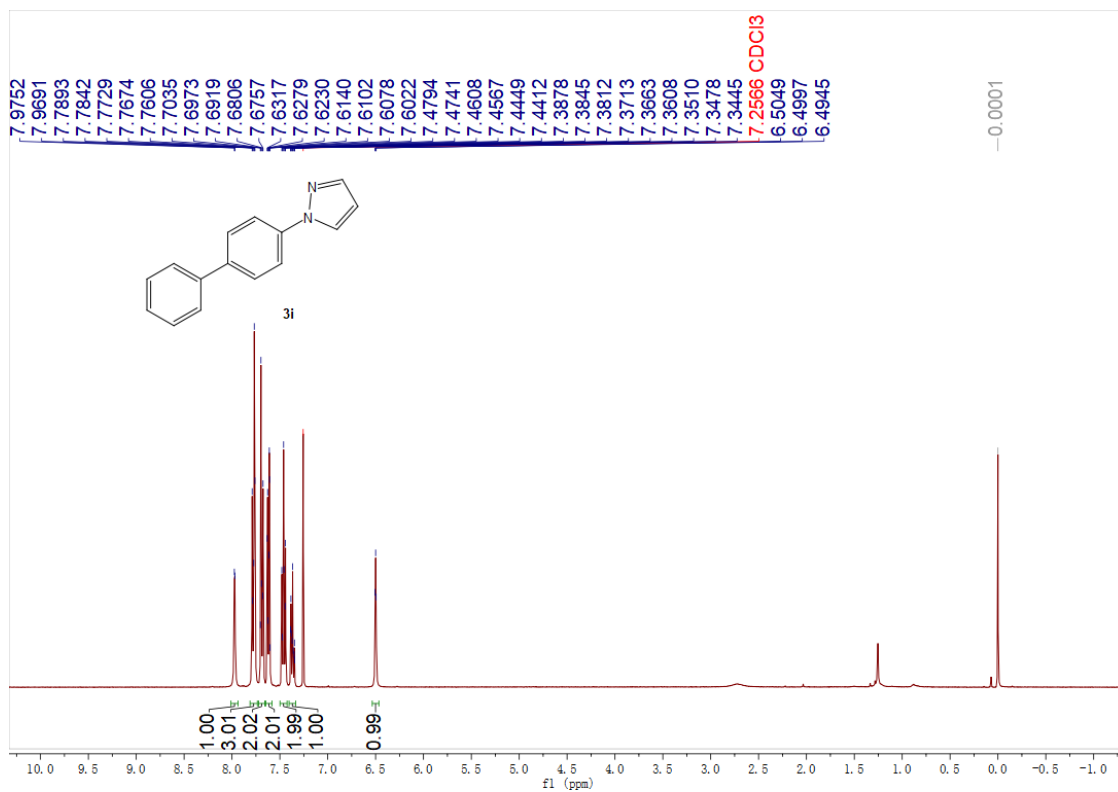

<sup>13</sup>C NMR Spectrum of **3i** (101 MHz, CDCl<sub>3</sub>)

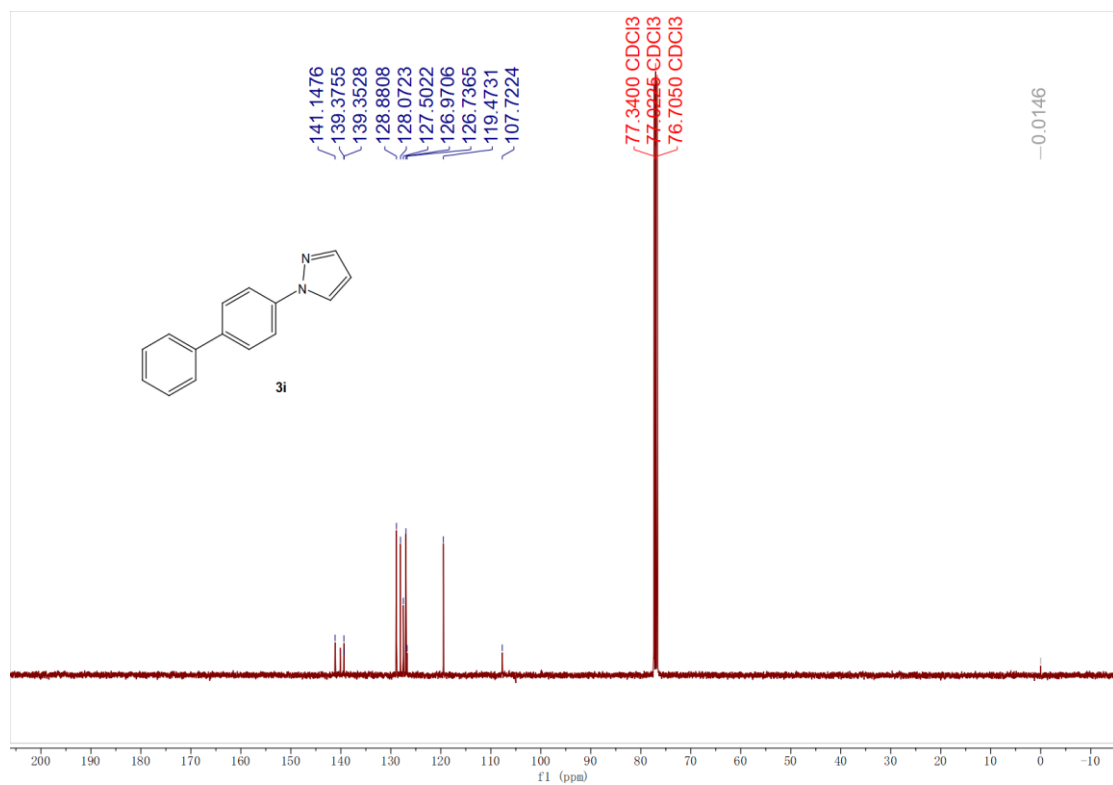



<sup>1</sup>H NMR Spectrum of **3j** (400 MHz, CDCl<sub>3</sub>)

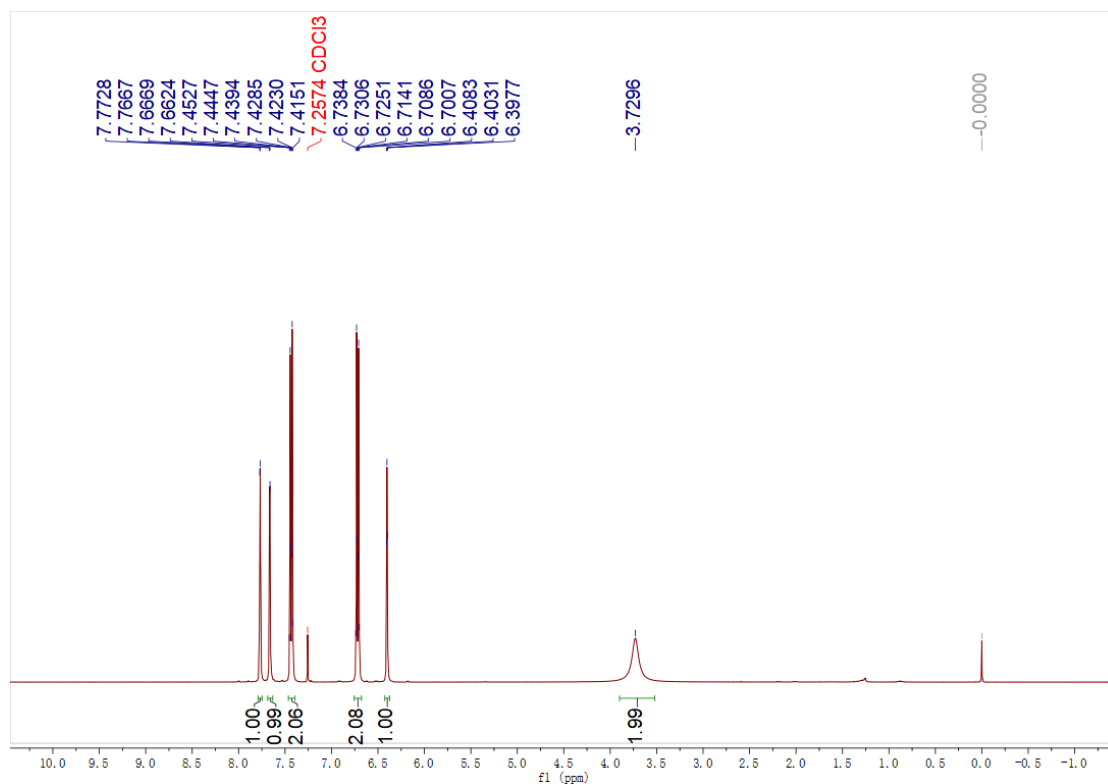

<sup>13</sup>C NMR Spectrum of **3j** (101 MHz, CDCl<sub>3</sub>)

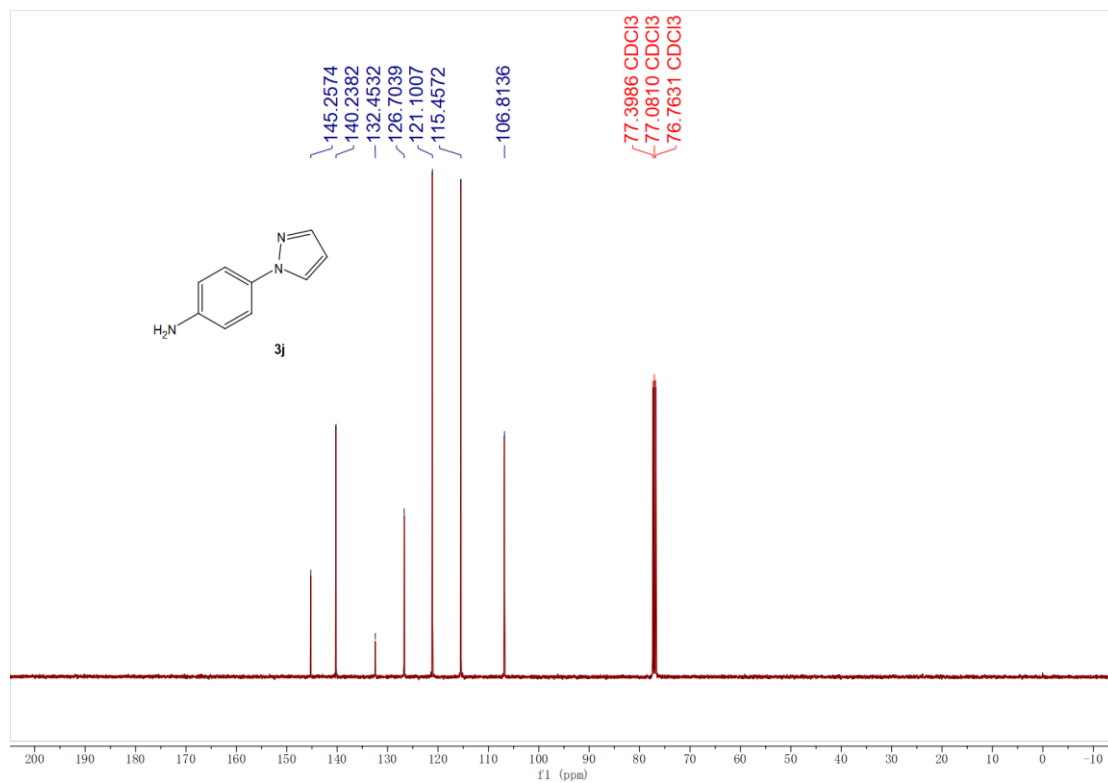

<sup>1</sup>H NMR Spectrum of **3k** (400 MHz, CDCl<sub>3</sub>)

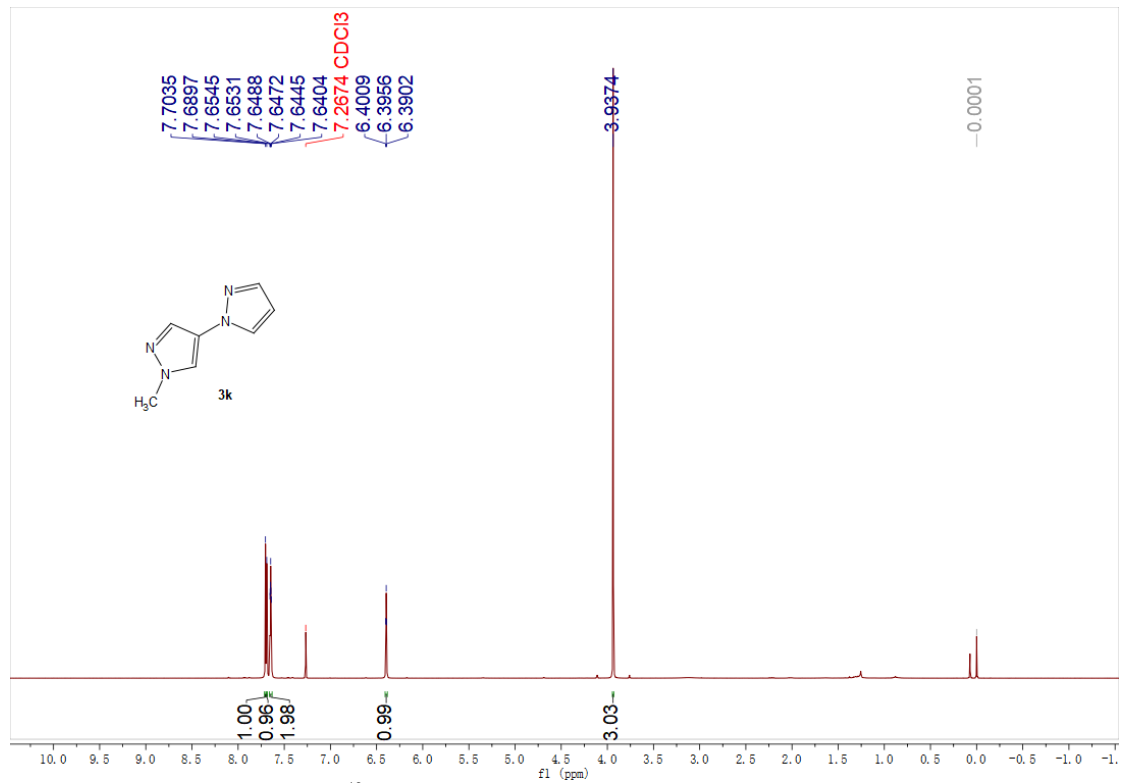

<sup>13</sup>C NMR Spectrum of **3k** (101 MHz, CDCl<sub>3</sub>)

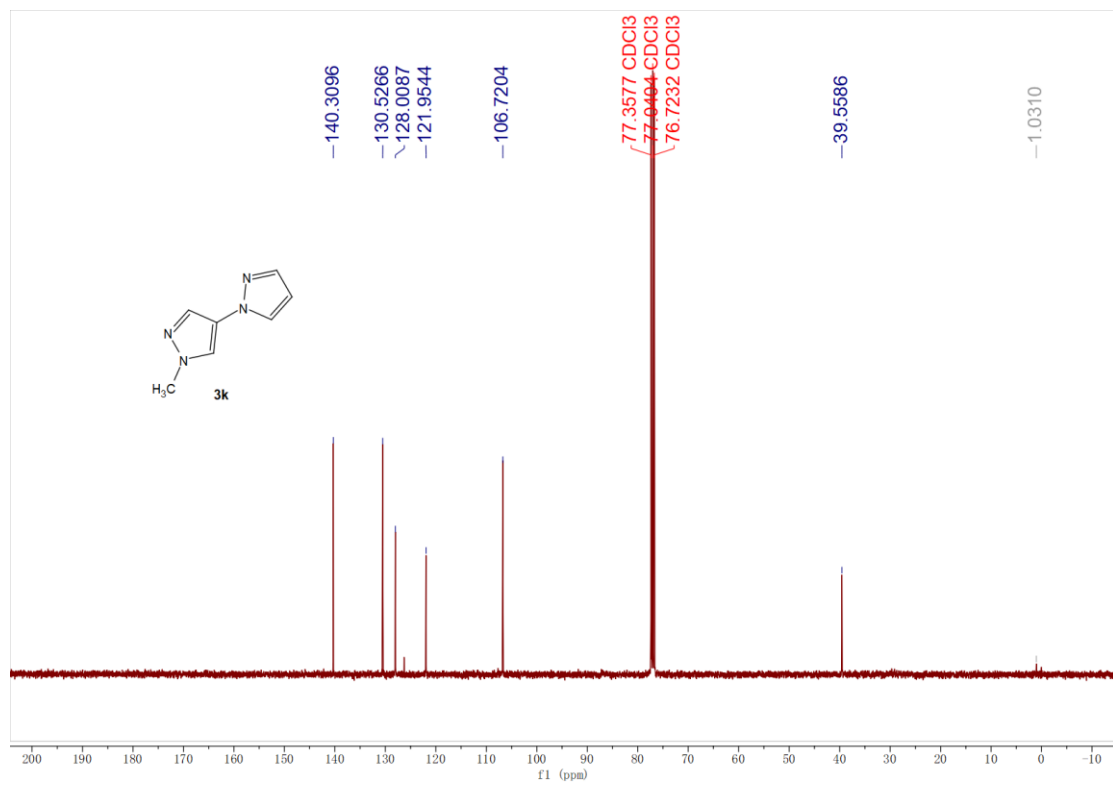

<sup>1</sup>H NMR Spectrum of **3I** (400 MHz, CDCl<sub>3</sub>)

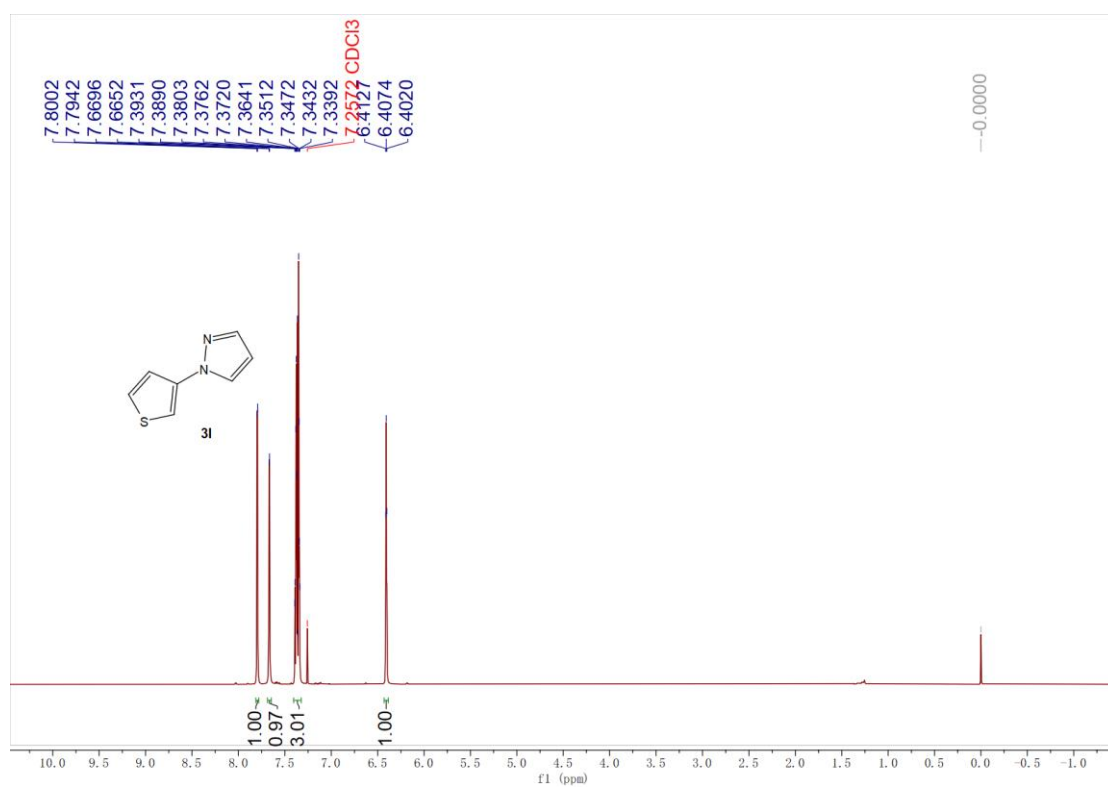

<sup>13</sup>C NMR Spectrum of **3I** (101 MHz, CDCl<sub>3</sub>)

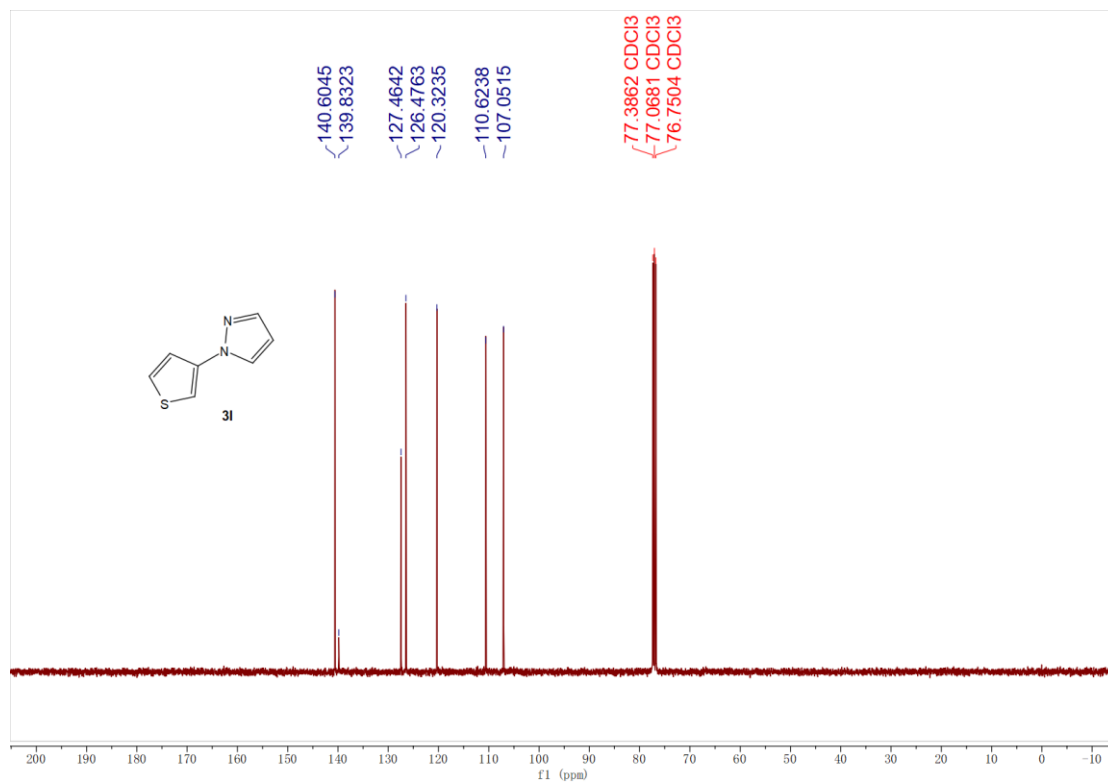

<sup>1</sup>H NMR Spectrum of **3m** (400 MHz, CDCl<sub>3</sub>)

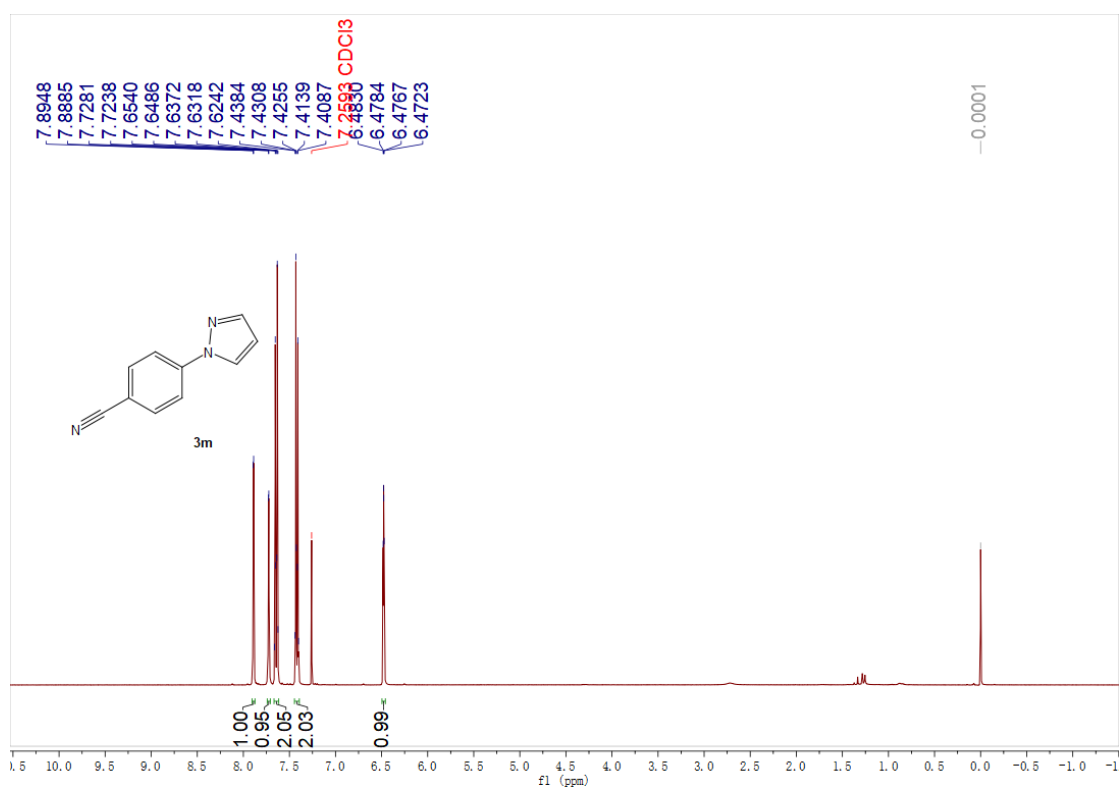

<sup>13</sup>C NMR Spectrum of **3m** (101 MHz, CDCl<sub>3</sub>)

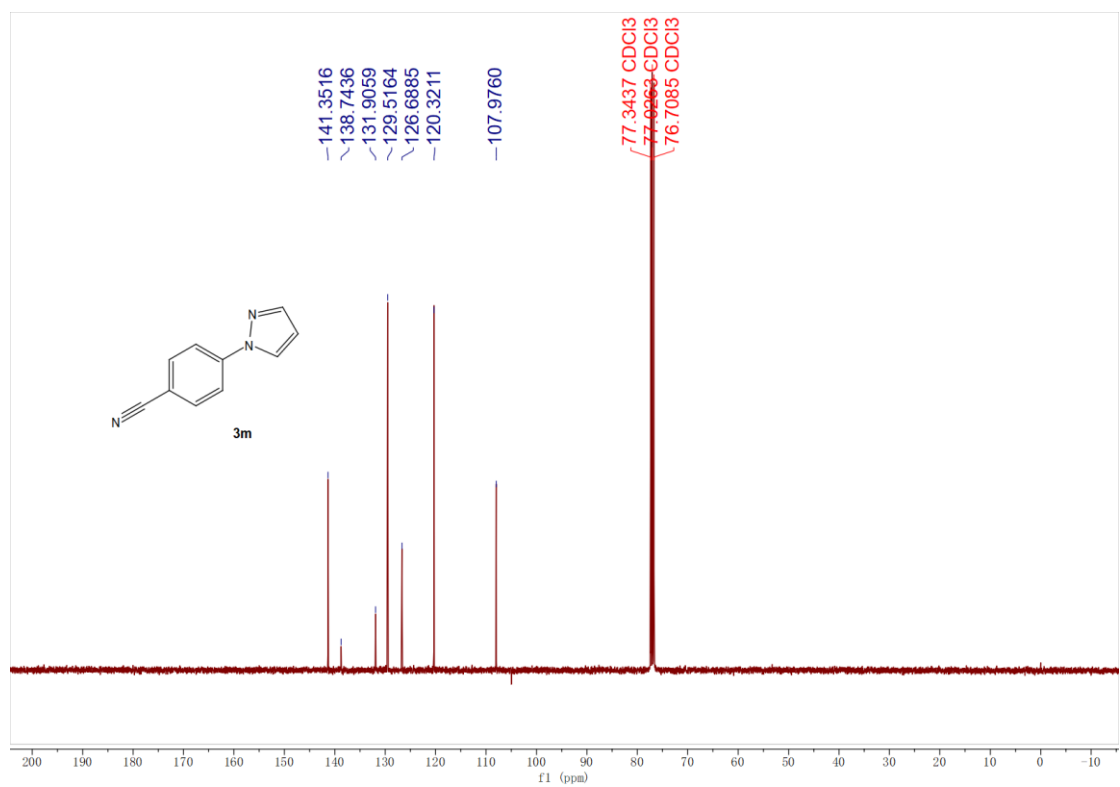

<sup>1</sup>H NMR Spectrum of **3n** (400 MHz, CDCl<sub>3</sub>)

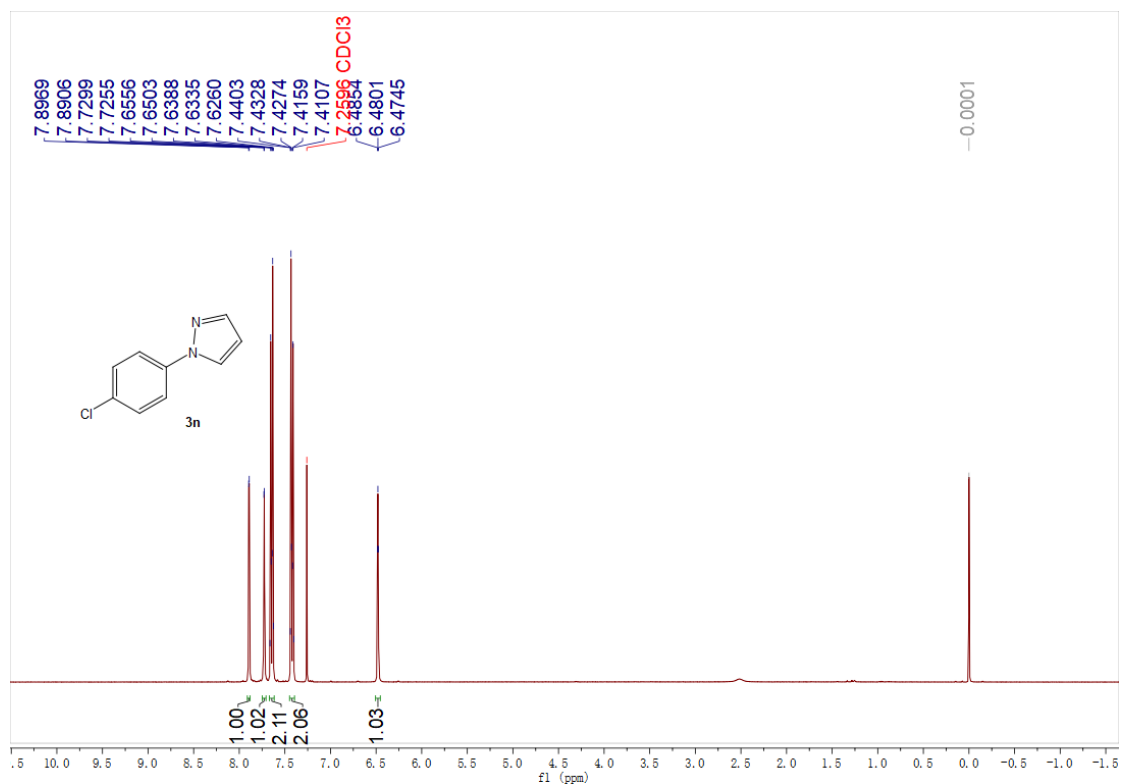

<sup>13</sup>C NMR Spectrum of **3n** (101 MHz, CDCl<sub>3</sub>)

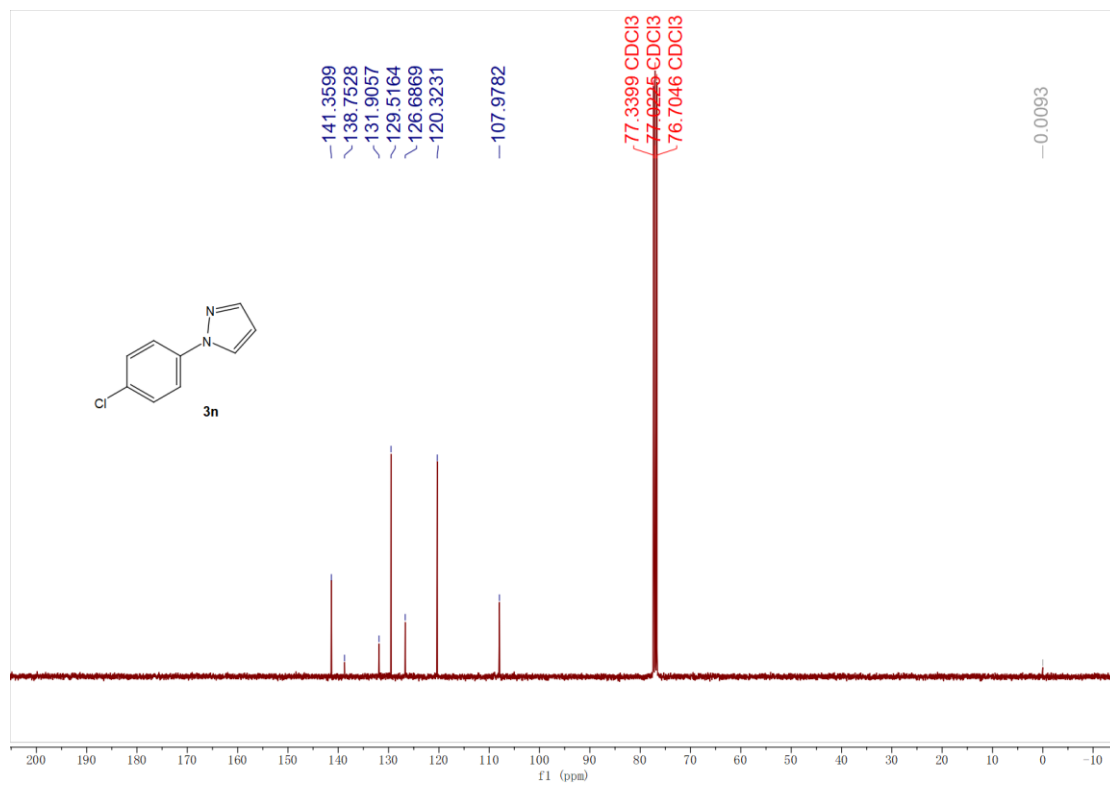

<sup>1</sup>H NMR Spectrum of **3o** (400 MHz, CDCl<sub>3</sub>)

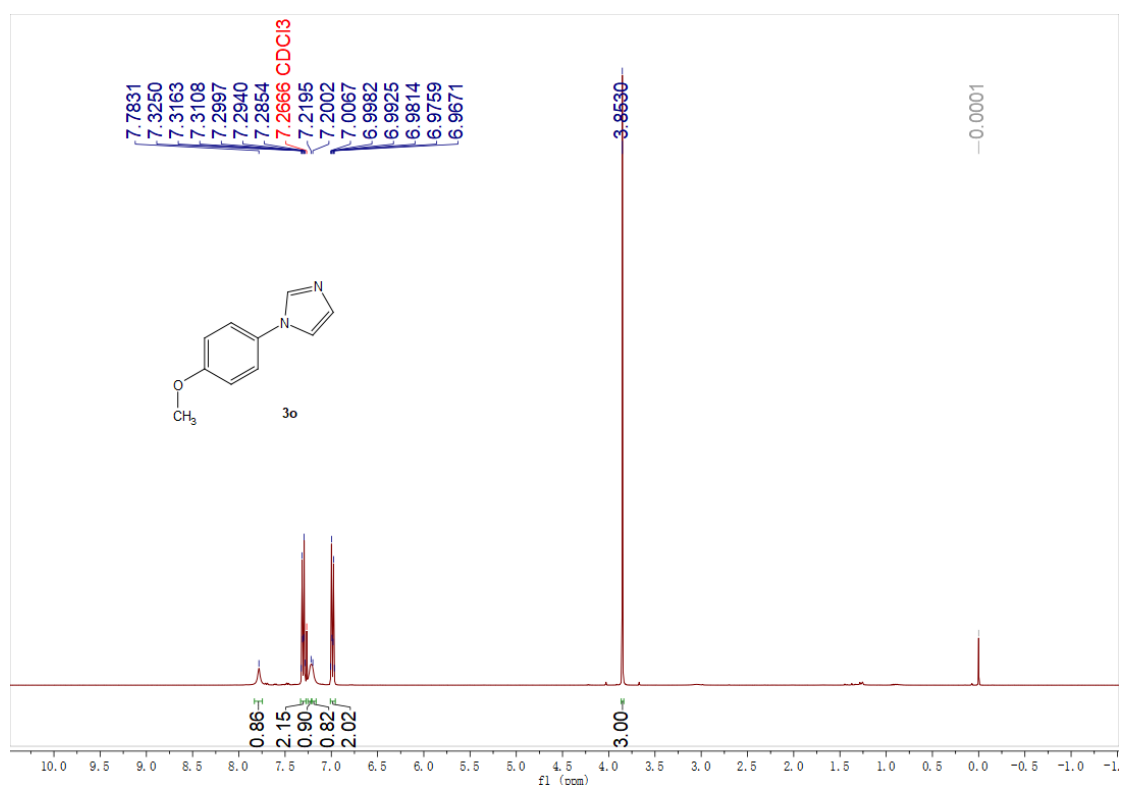

<sup>13</sup>C NMR Spectrum of **3o** (101 MHz, CDCl<sub>3</sub>)

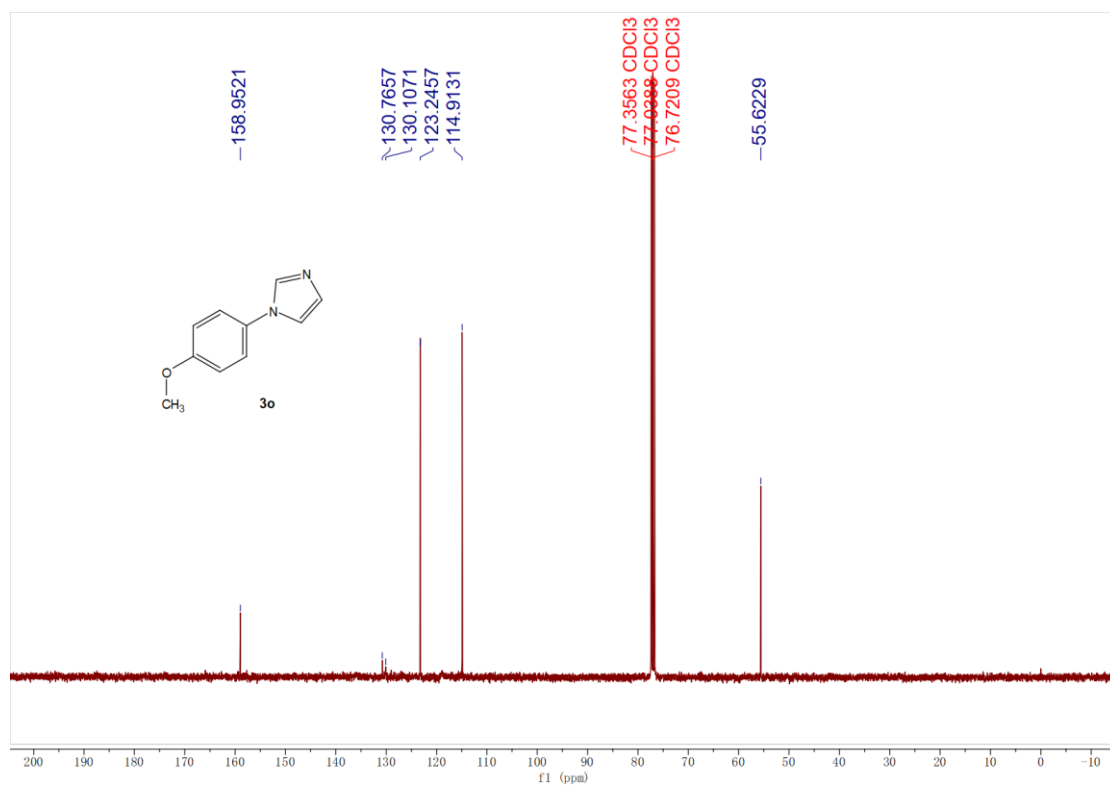

<sup>1</sup>H NMR Spectrum of **3p** (400 MHz, CDCl<sub>3</sub>)

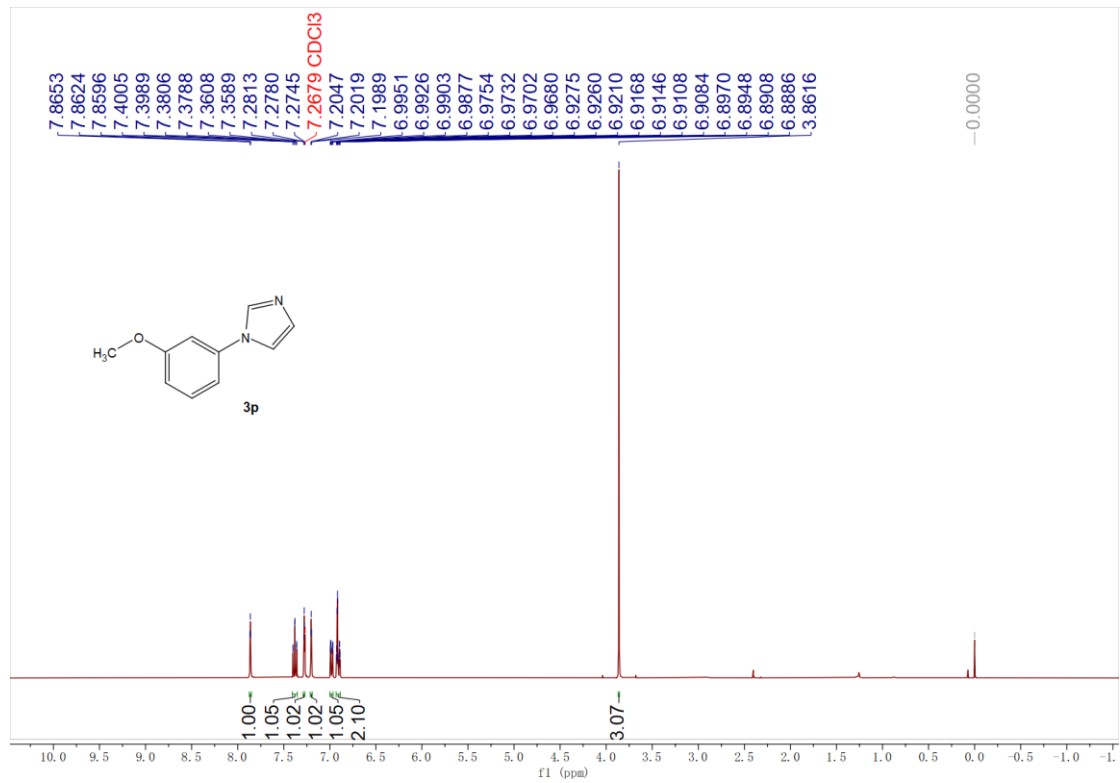

<sup>13</sup>C NMR Spectrum of **3p** (101 MHz, CDCl<sub>3</sub>)

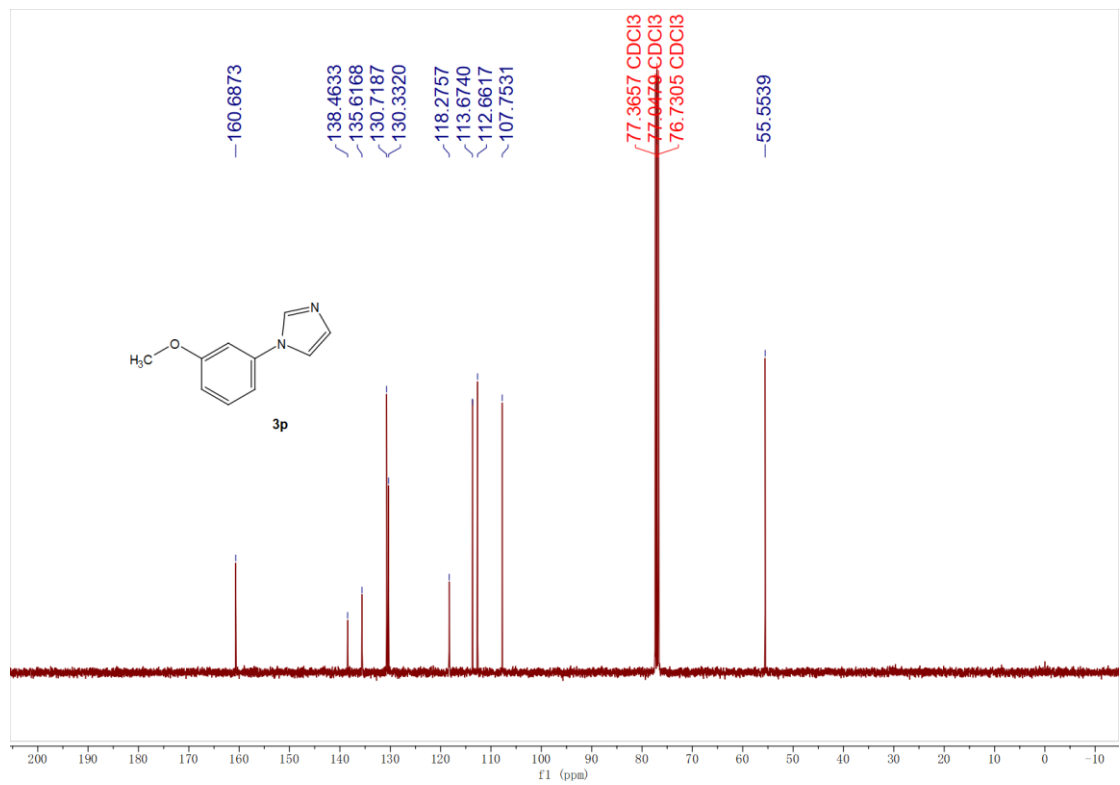

<sup>1</sup>H NMR Spectrum of **3q** (400 MHz, CDCl<sub>3</sub>)

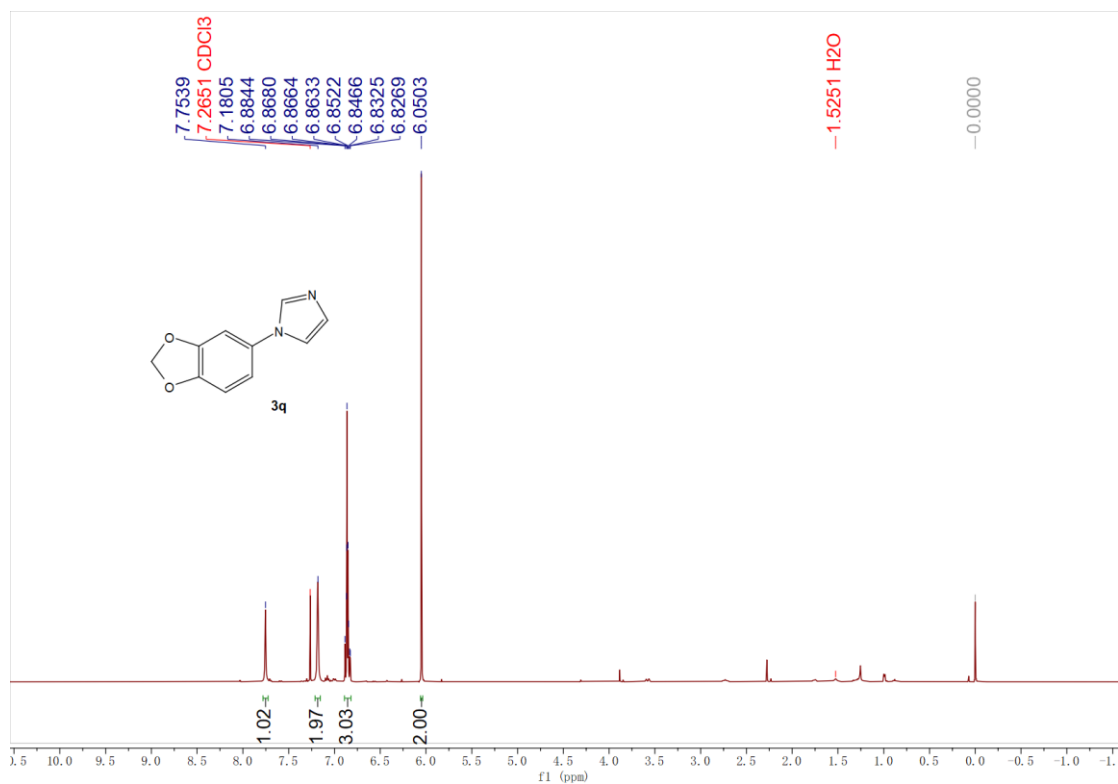

<sup>13</sup>C NMR Spectrum of **3q** (101 MHz, CDCl<sub>3</sub>)

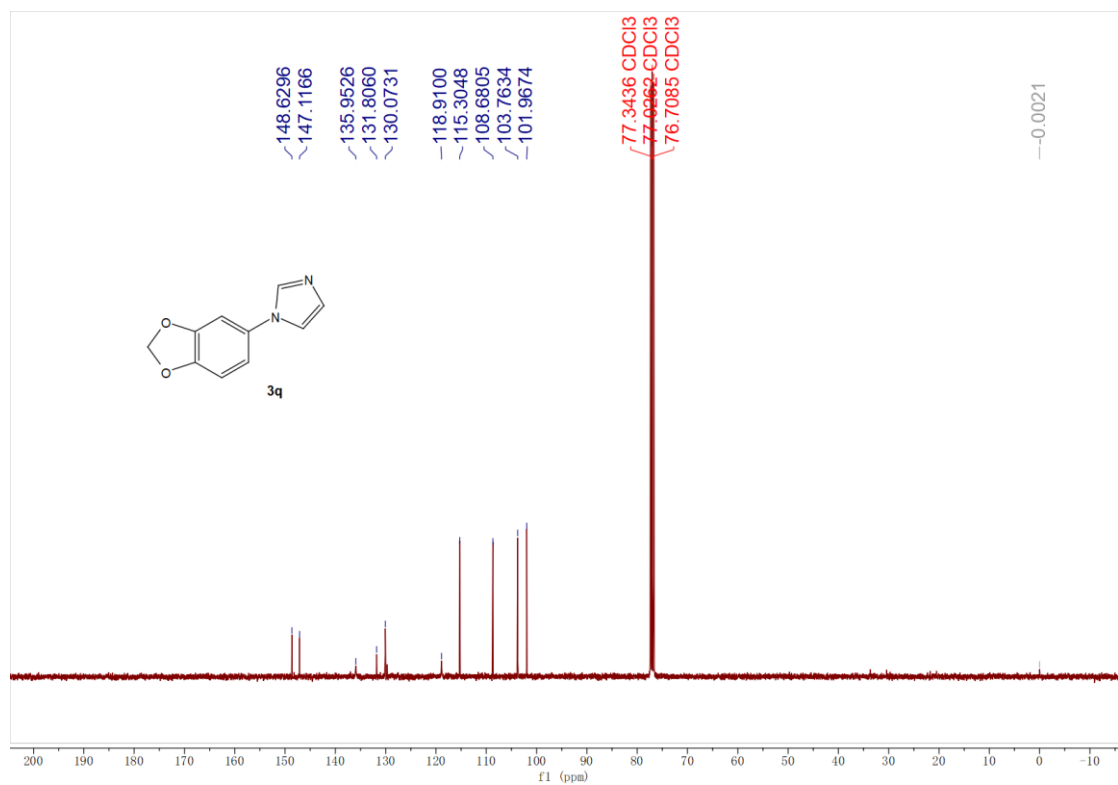



<sup>1</sup>H NMR Spectrum of **3r** (400 MHz, CDCl<sub>3</sub>)

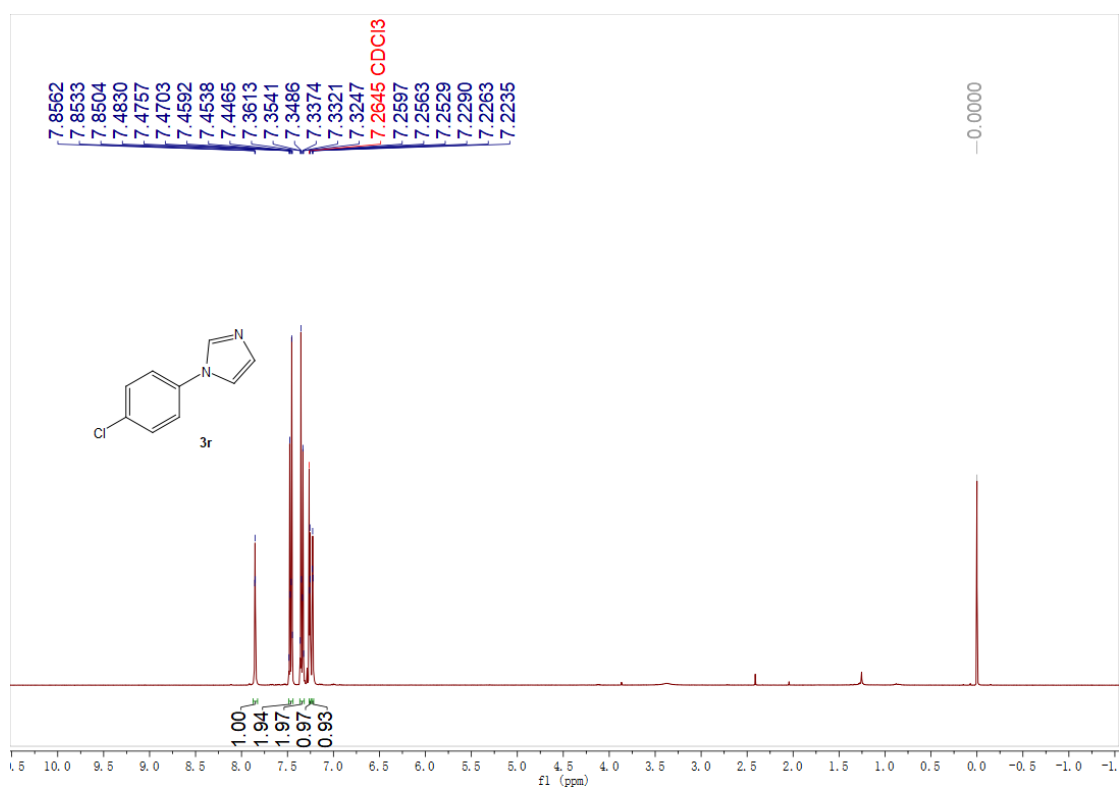

<sup>13</sup>C NMR Spectrum of **3r** (101 MHz, CDCl<sub>3</sub>)

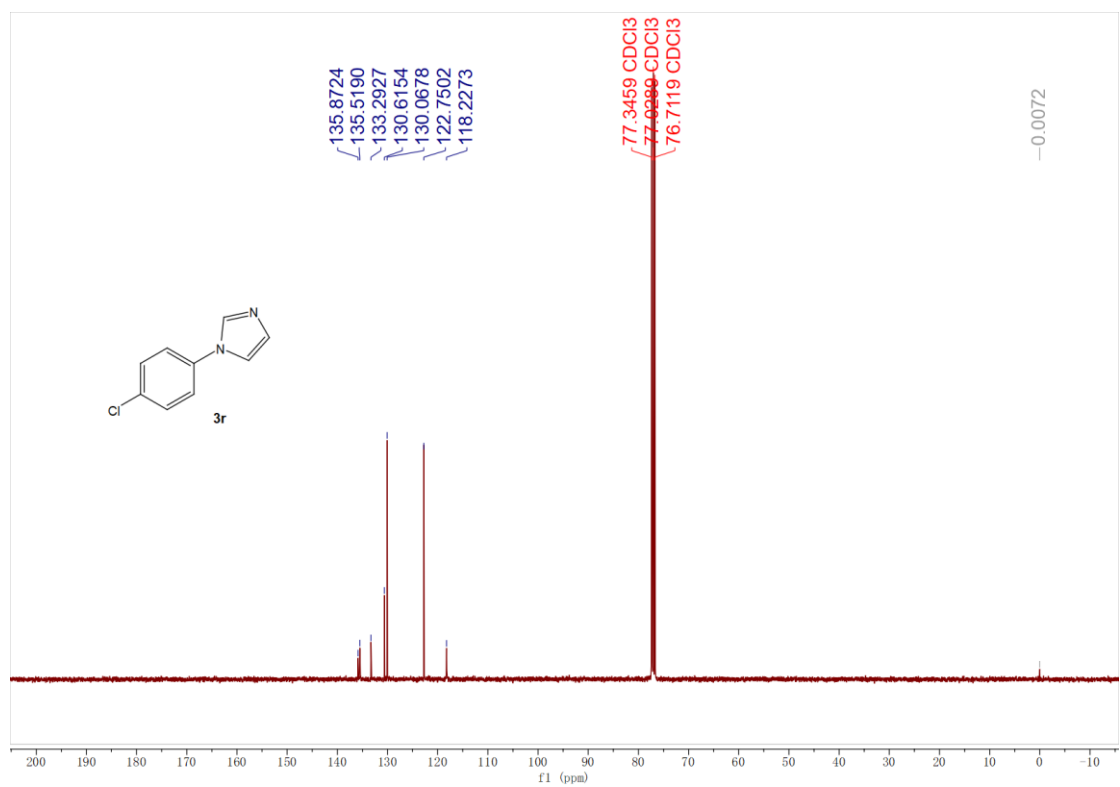

<sup>1</sup>H NMR Spectrum of **3s** (400 MHz, CDCl<sub>3</sub>)

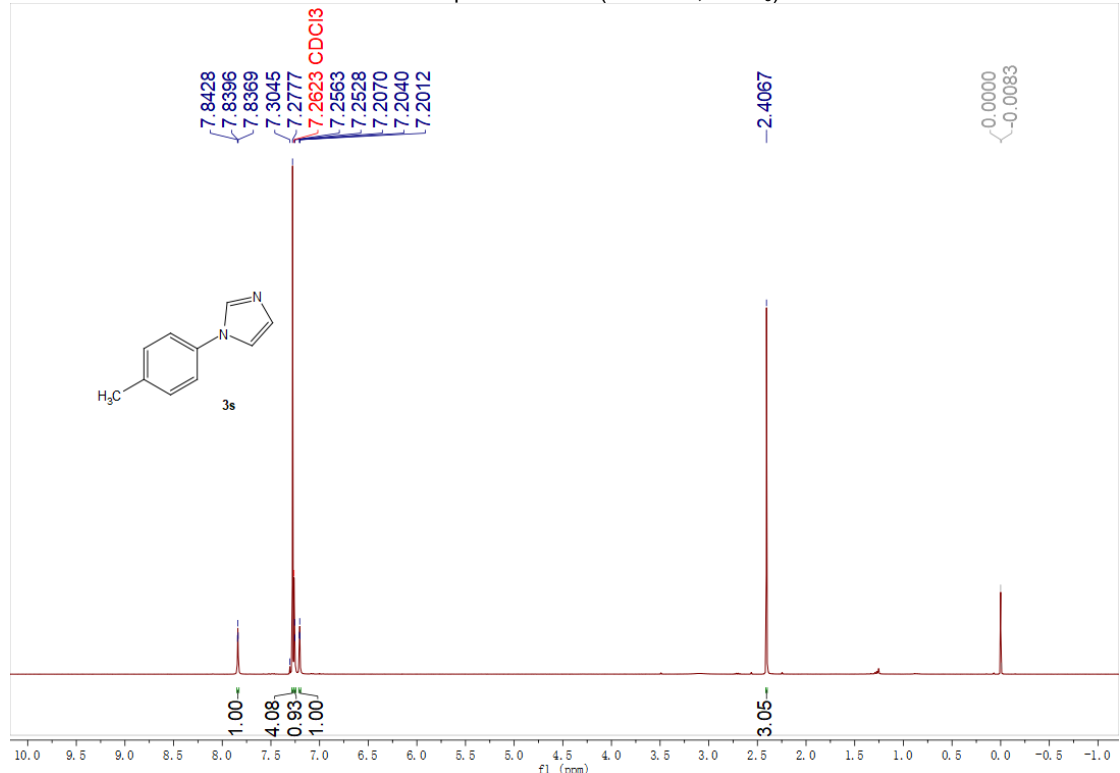

<sup>13</sup>C NMR Spectrum of **3s** (101 MHz, CDCl<sub>3</sub>)

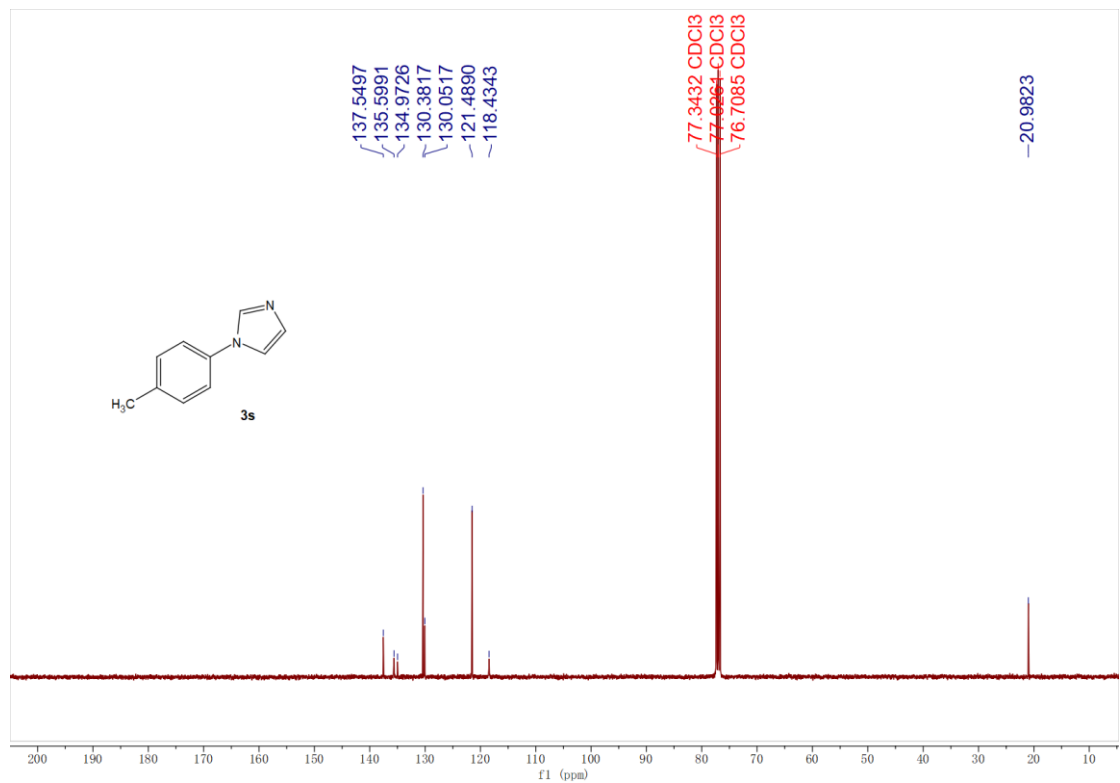

<sup>1</sup>H NMR Spectrum of **3t** (400 MHz, CDCl<sub>3</sub>)

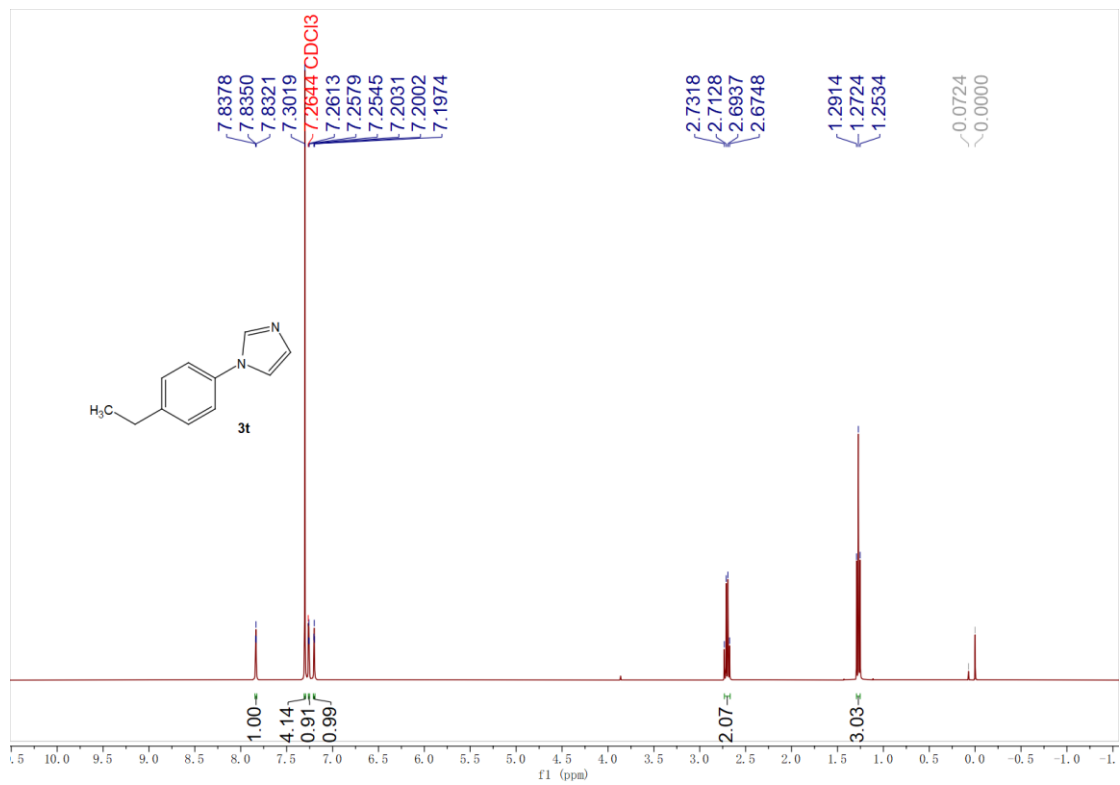

<sup>13</sup>C NMR Spectrum of **3t** (101 MHz, CDCl<sub>3</sub>)

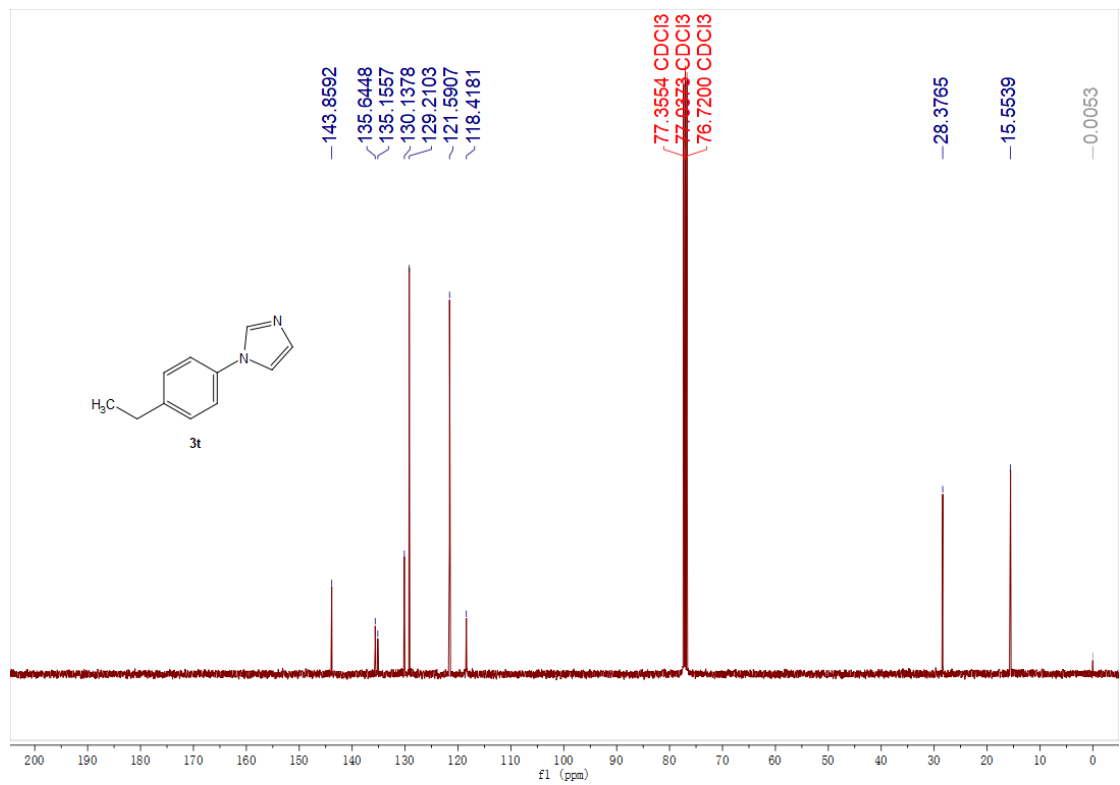

<sup>1</sup>H NMR Spectrum of **3u** (400 MHz, CDCl<sub>3</sub>)

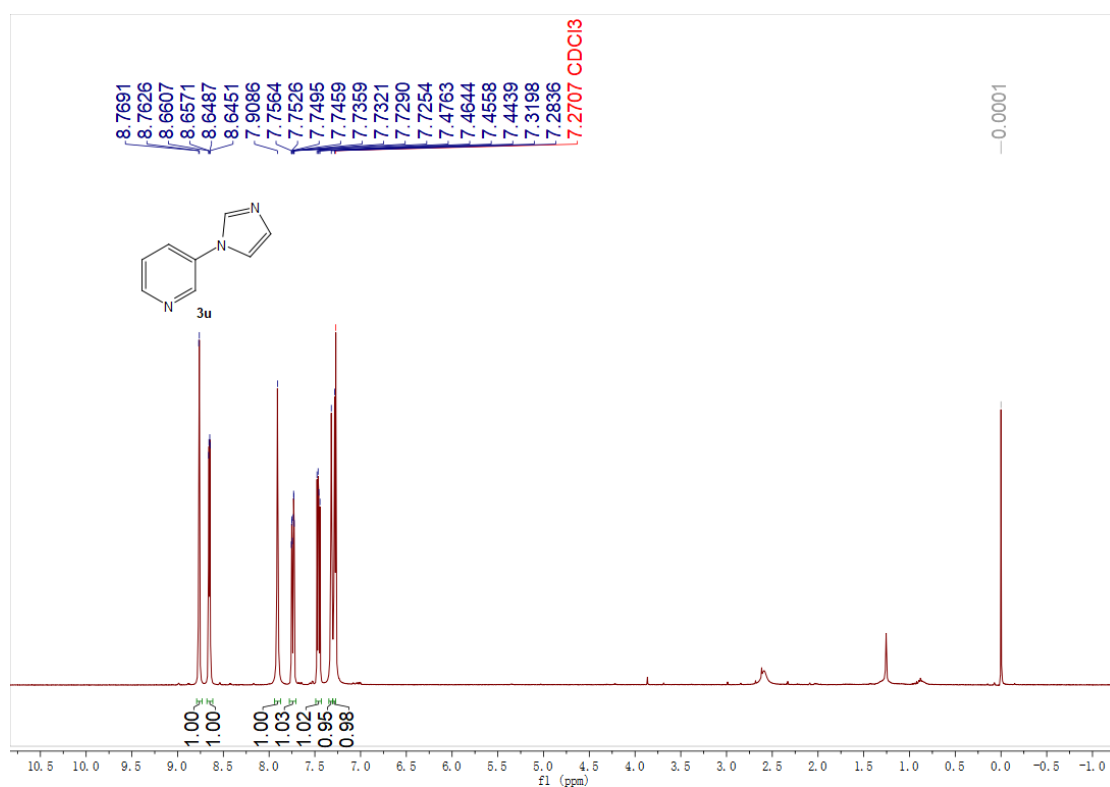

<sup>13</sup>C NMR Spectrum of **3u** (101 MHz, CDCl<sub>3</sub>)

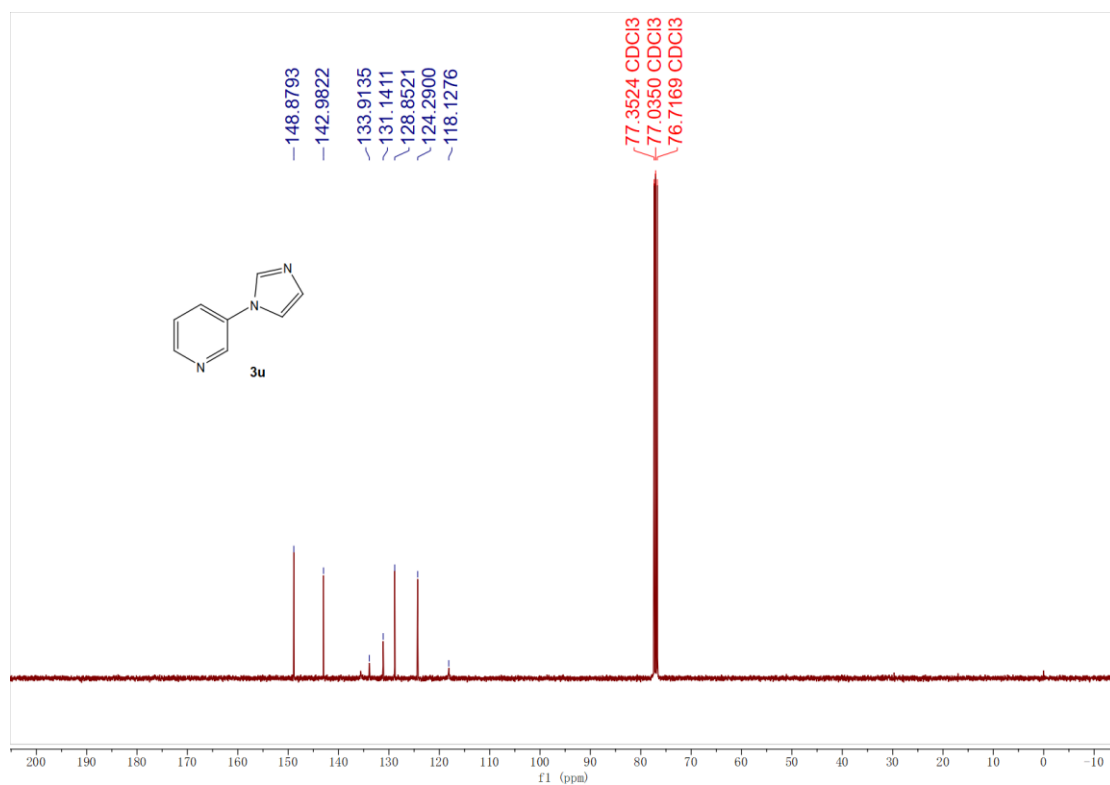

<sup>1</sup>H NMR Spectrum of **3v** (400 MHz, CDCl<sub>3</sub>)

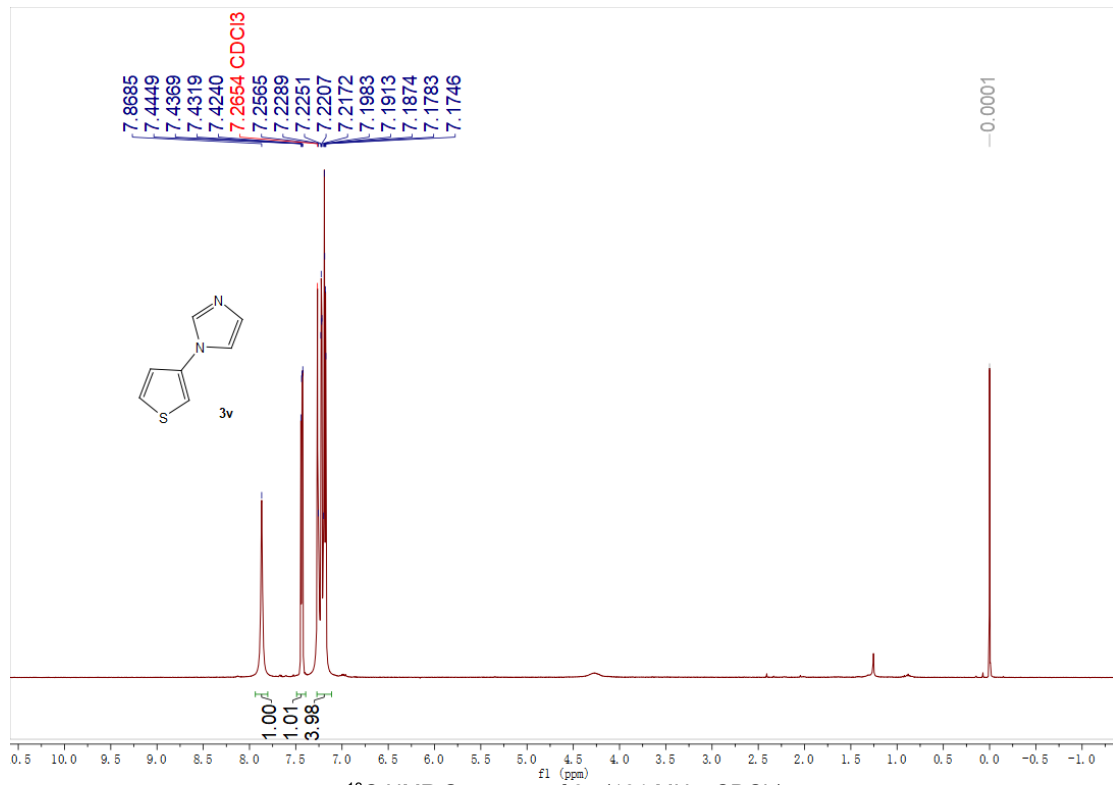

<sup>13</sup>C NMR Spectrum of **3v** (101 MHz, CDCl<sub>3</sub>)

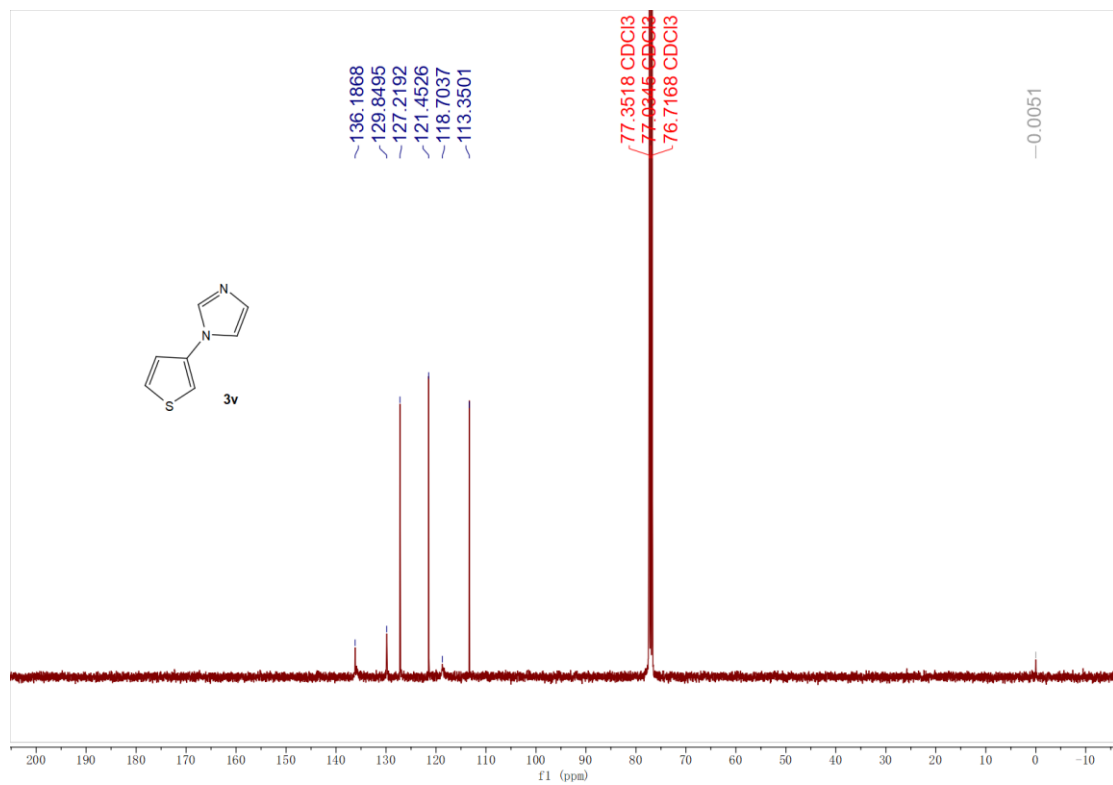

<sup>1</sup>H NMR Spectrum of **3w** (600 MHz, CDCl<sub>3</sub>)

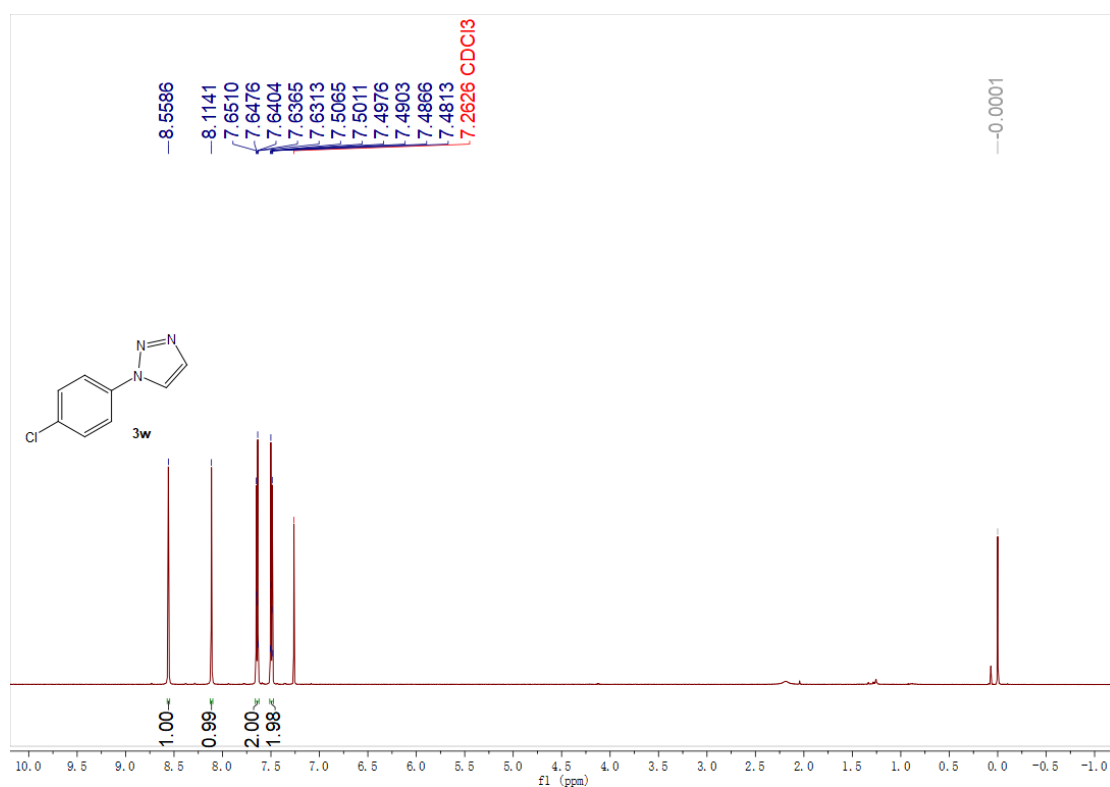

<sup>13</sup>C NMR Spectrum of **3w** (151 MHz, CDCl<sub>3</sub>)

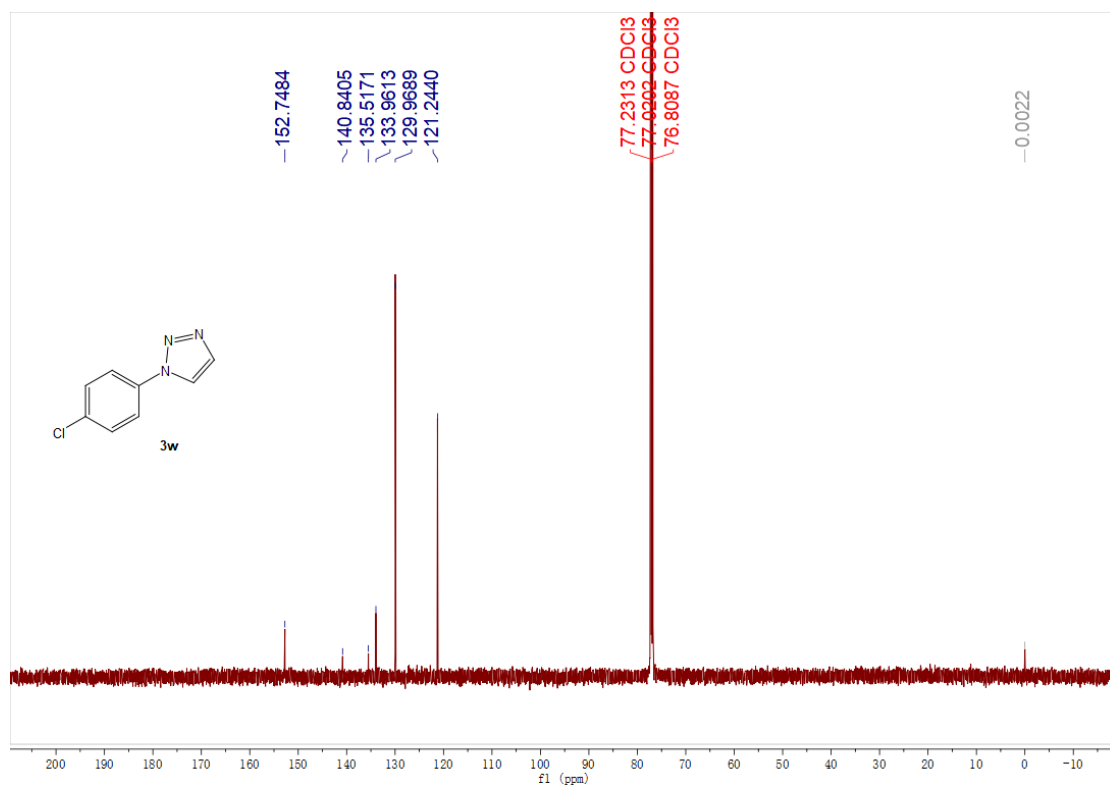

<sup>1</sup>H NMR Spectrum of **3x** (600 MHz, CDCl<sub>3</sub>)

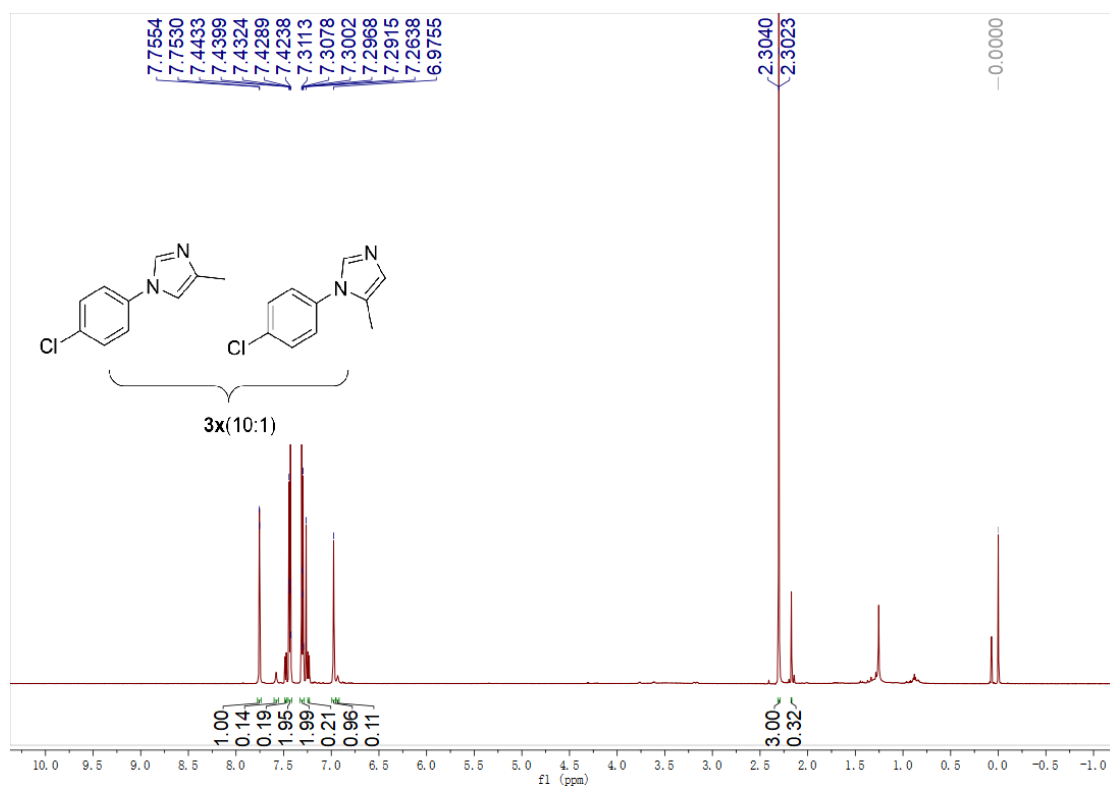

<sup>13</sup>C NMR Spectrum of **3x** (151 MHz, CDCl<sub>3</sub>)

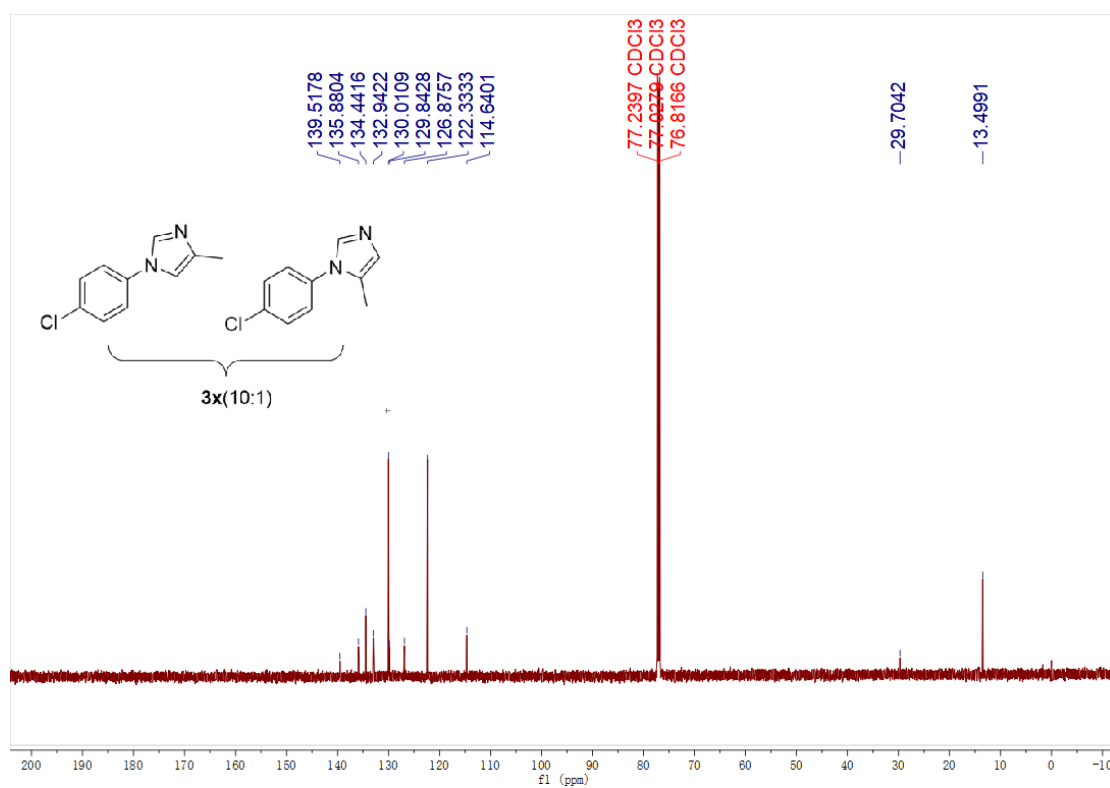

<sup>1</sup>H NMR Spectrum of **3y** (600 MHz, CDCl<sub>3</sub>)

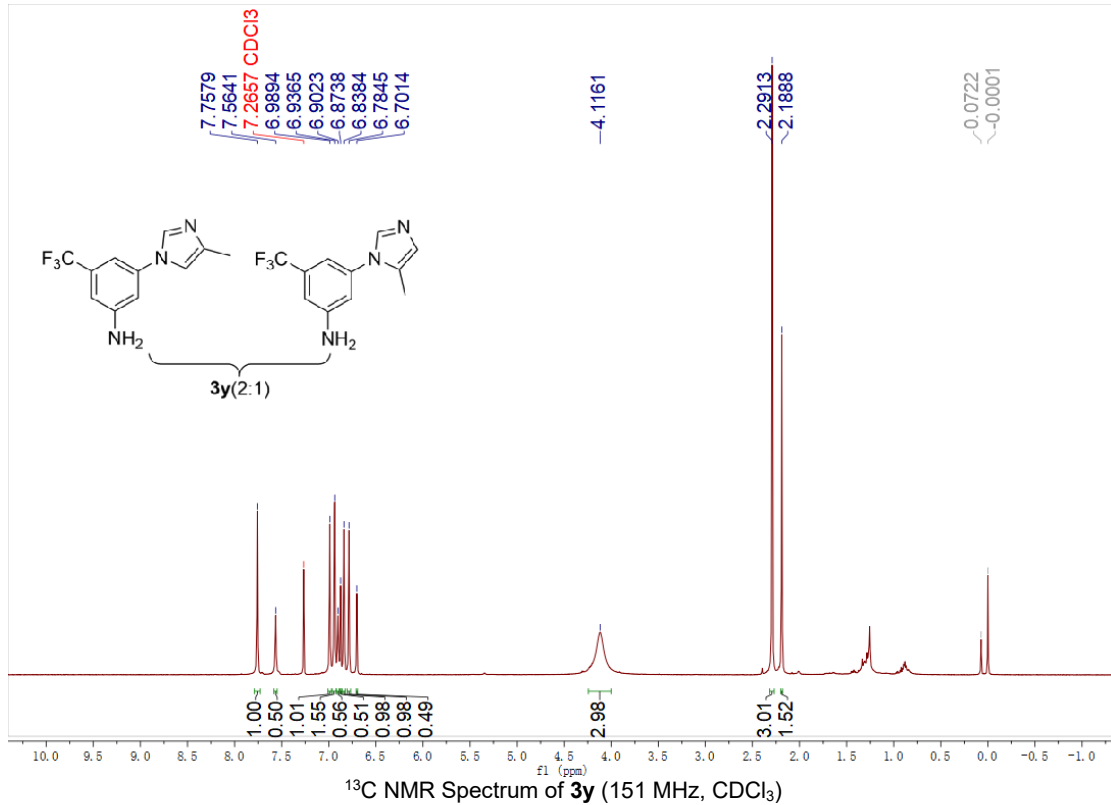

<sup>13</sup>C NMR Spectrum of **3y** (151 MHz, CDCl<sub>3</sub>)

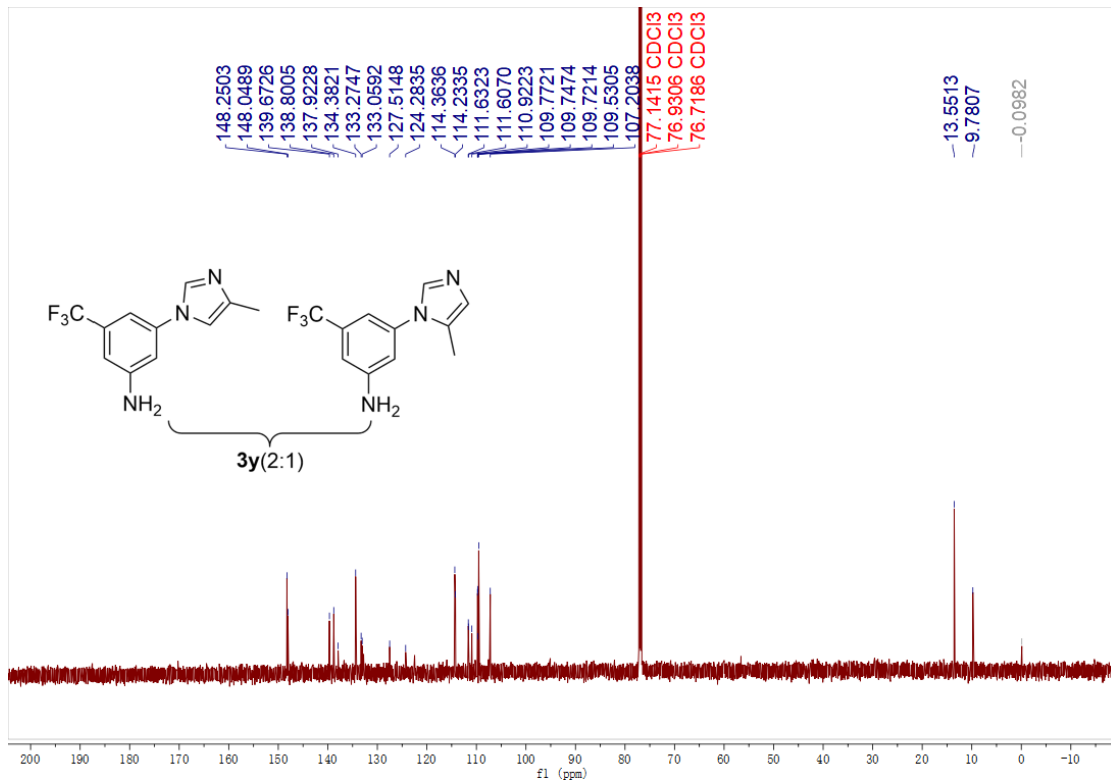



<sup>1</sup>H NMR Spectrum of **5a** (400 MHz, CDCl<sub>3</sub>)

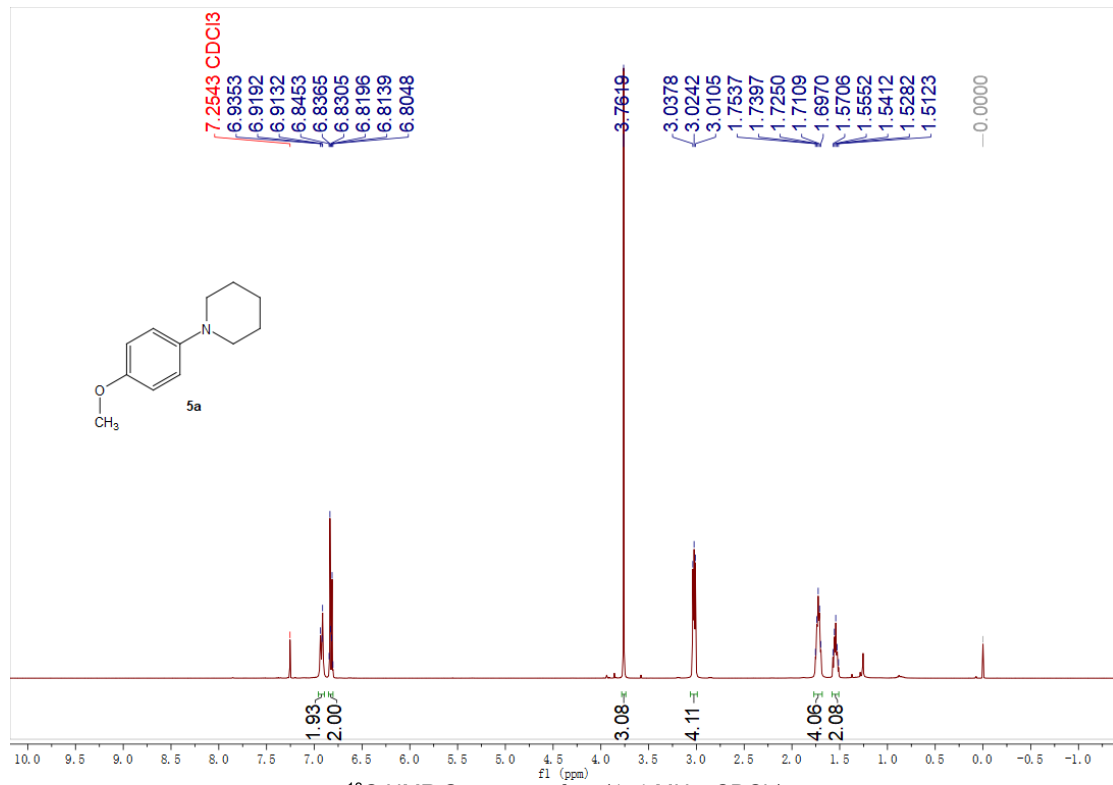

<sup>13</sup>C NMR Spectrum of **5a** (151 MHz, CDCl<sub>3</sub>)

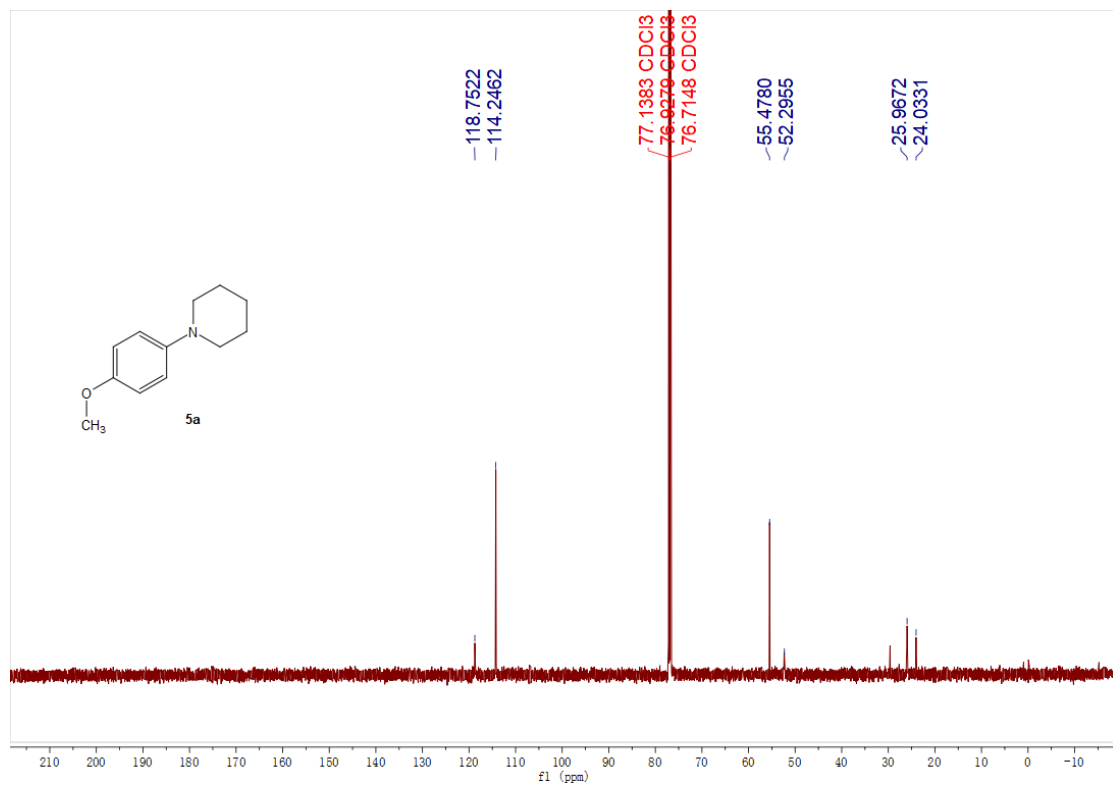

<sup>1</sup>H NMR Spectrum of **5b** (400 MHz, CDCl<sub>3</sub>)

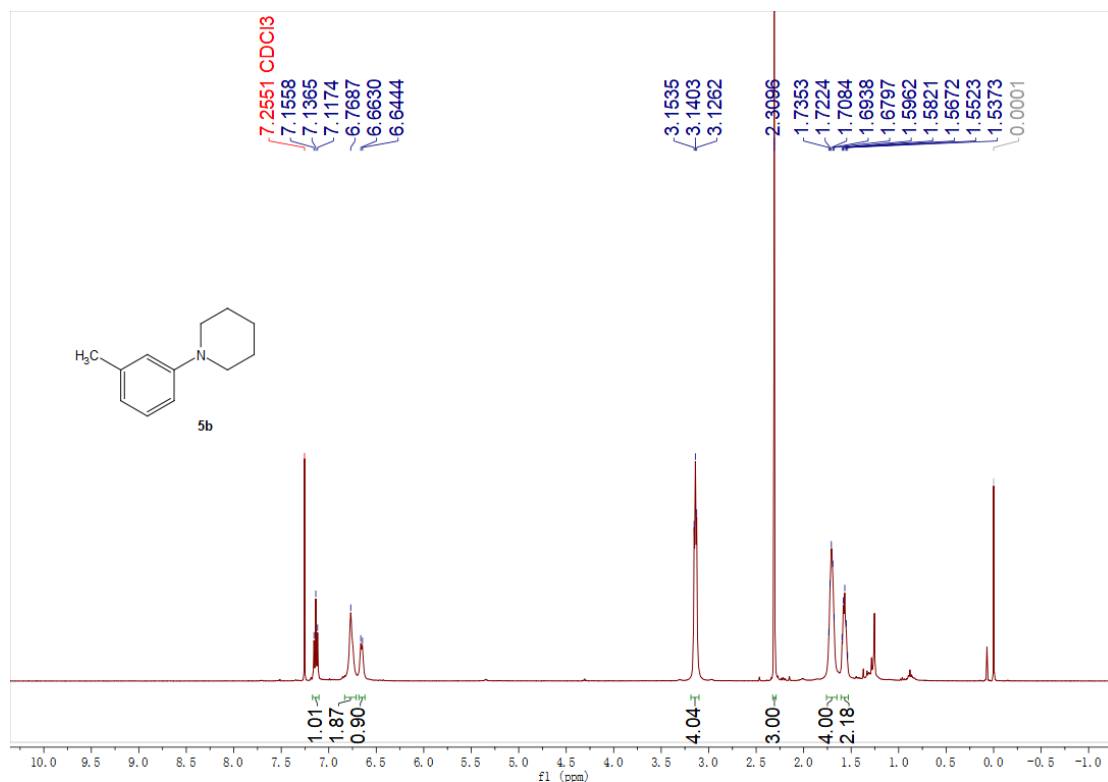

<sup>13</sup>C NMR Spectrum of **5b** (101 MHz, CDCl<sub>3</sub>)

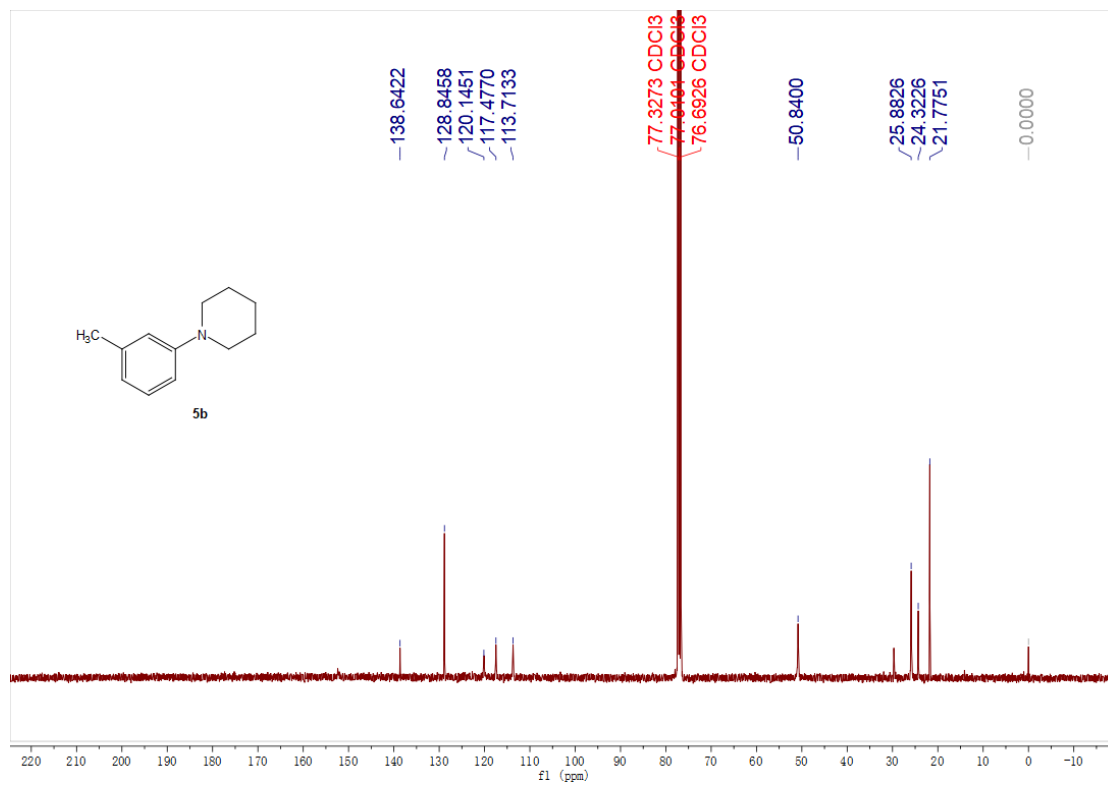

<sup>1</sup>H NMR Spectrum of **5c** (600 MHz, CDCl<sub>3</sub>)

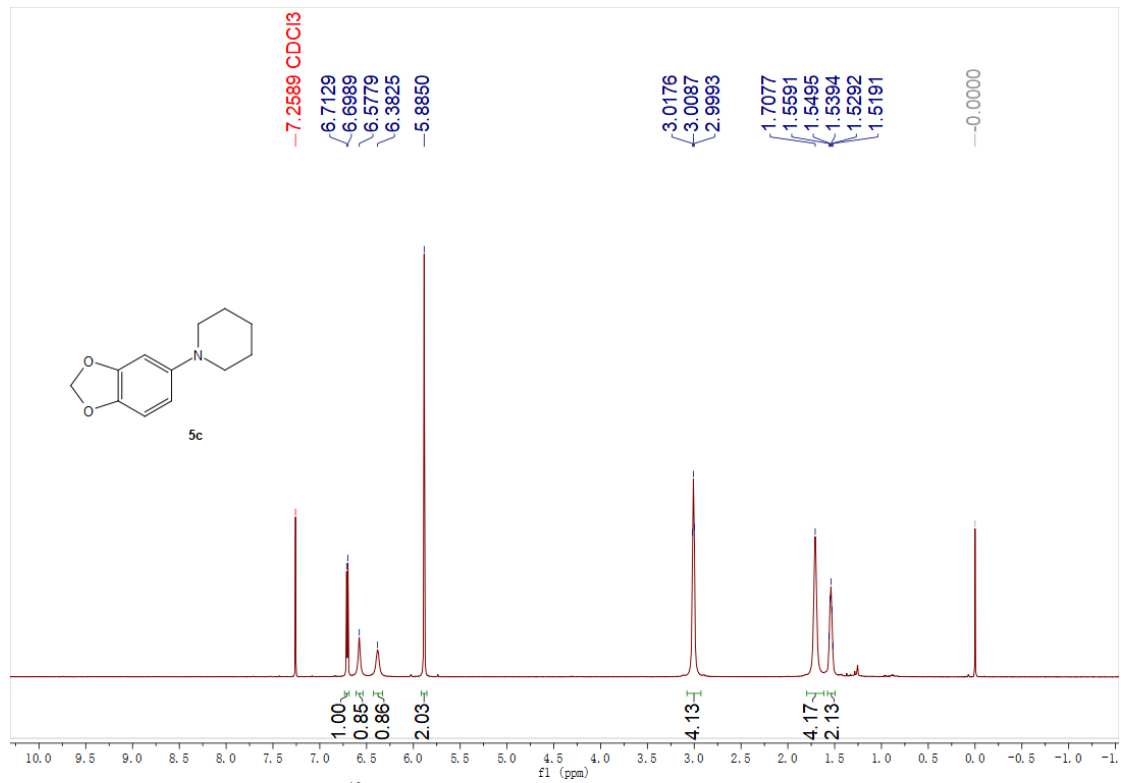

<sup>13</sup>C NMR Spectrum of **5c** (151 MHz, CDCl<sub>3</sub>)

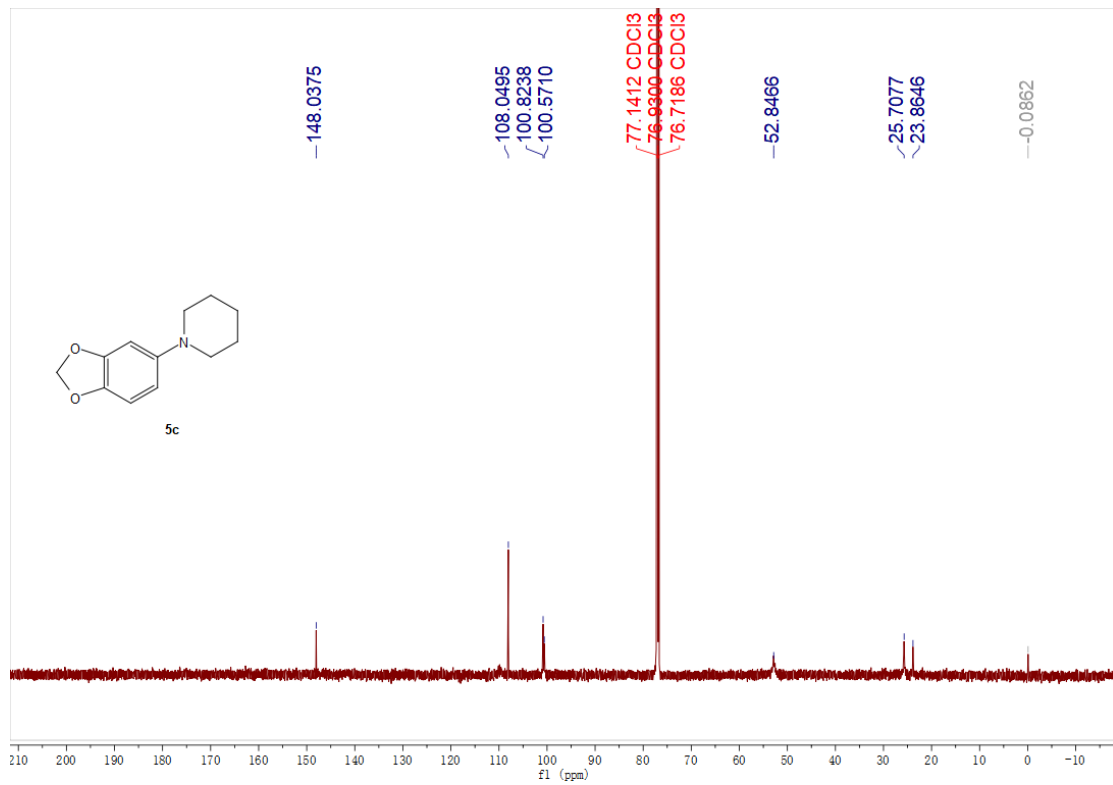

<sup>1</sup>H NMR Spectrum of **5d** (400 MHz, CDCl<sub>3</sub>)

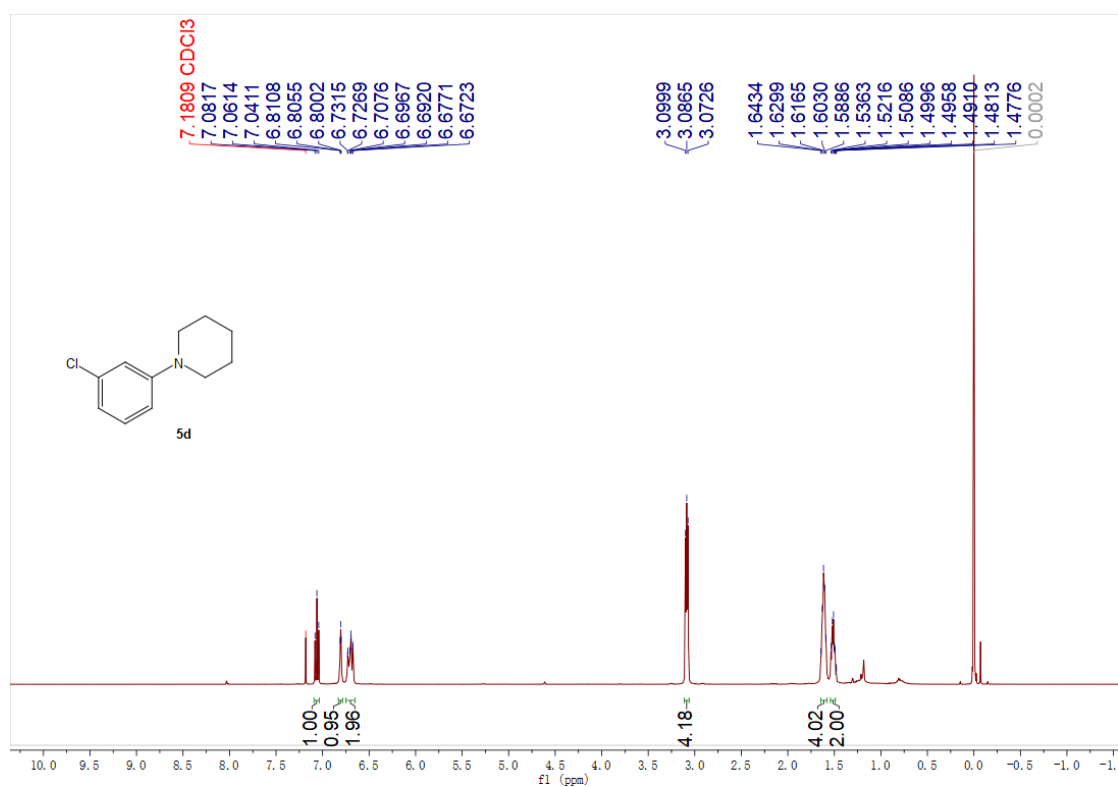

<sup>13</sup>C NMR Spectrum of **5d** (101 MHz, CDCl<sub>3</sub>)

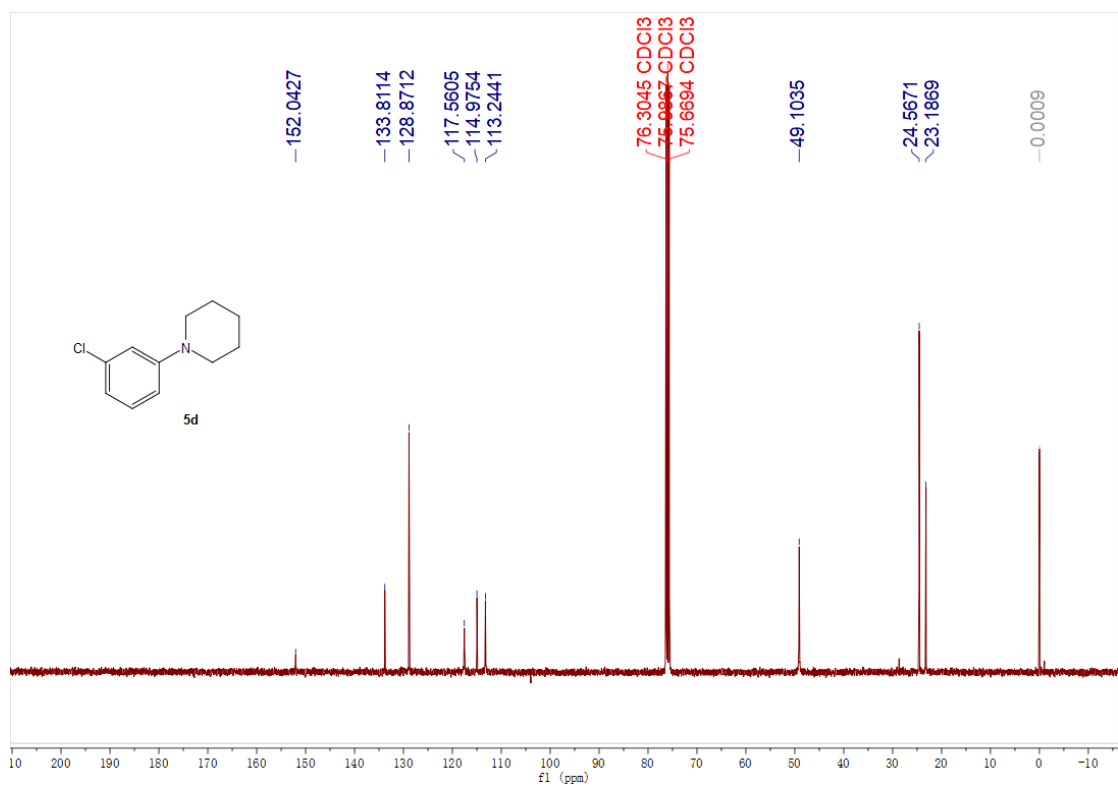

<sup>1</sup>H NMR Spectrum of **5e** (400 MHz, CDCl<sub>3</sub>)

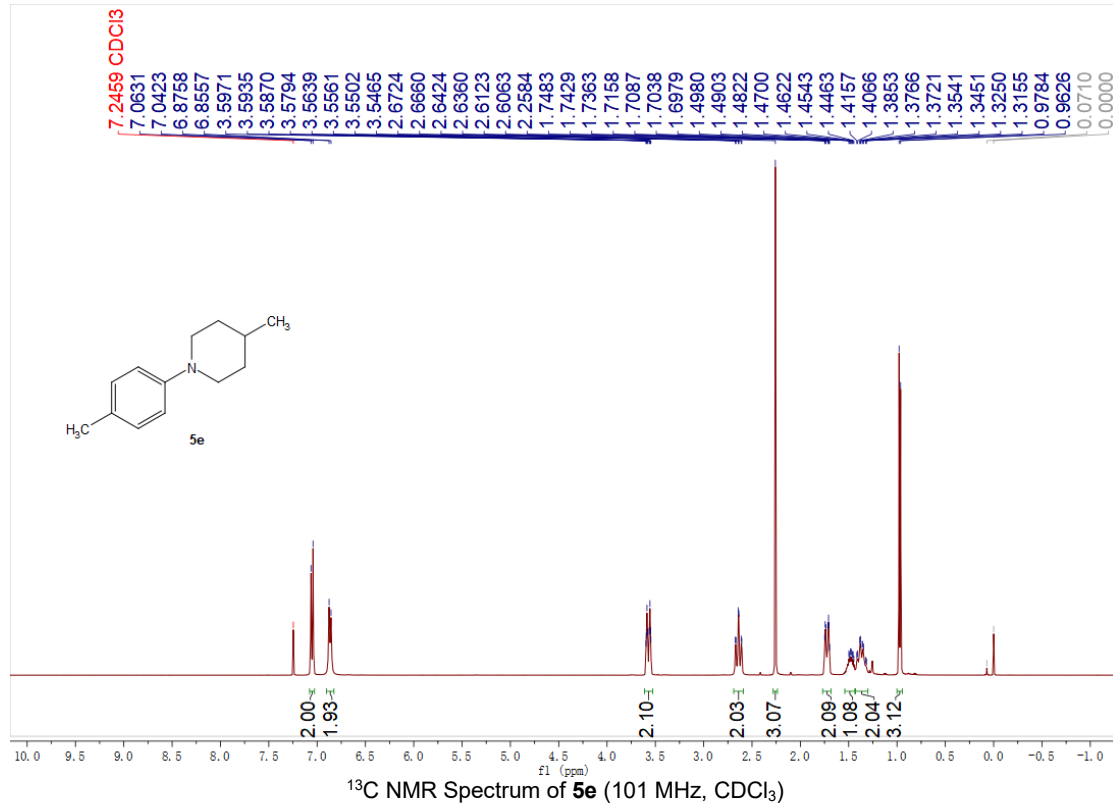

<sup>13</sup>C NMR Spectrum of **5e** (101 MHz, CDCl<sub>3</sub>)

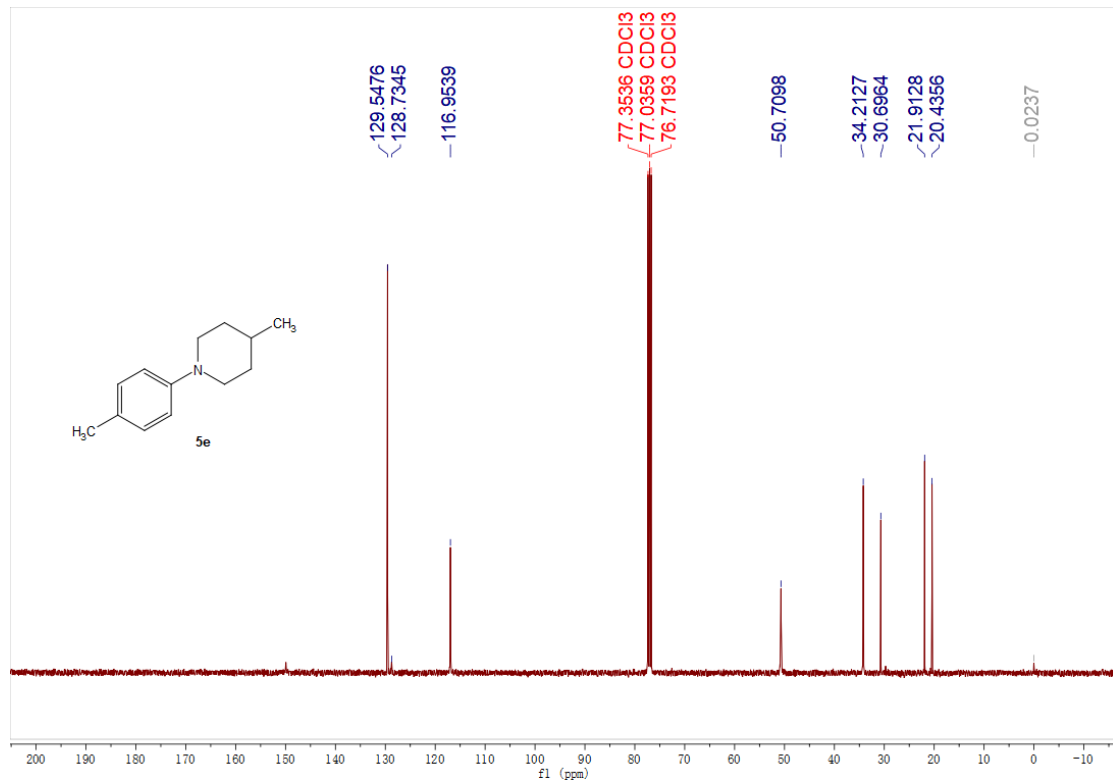

<sup>1</sup>H NMR Spectrum of **5f** (400 MHz, CDCl<sub>3</sub>)

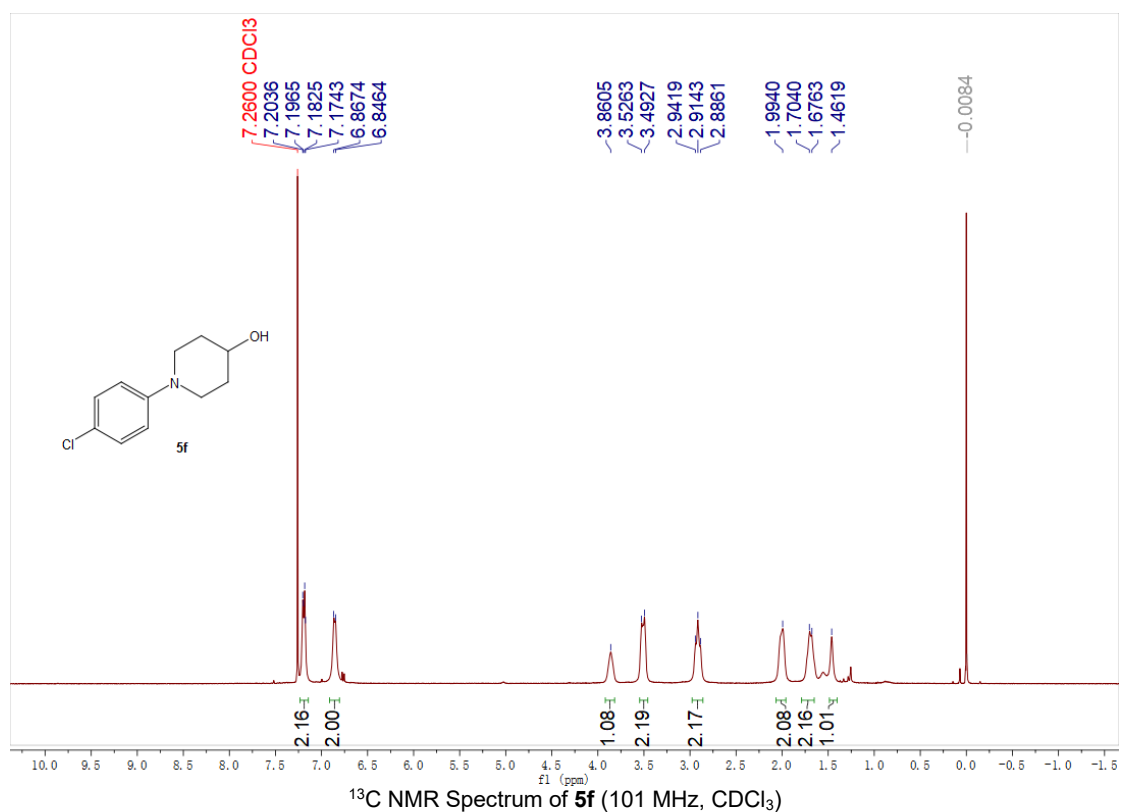

<sup>13</sup>C NMR Spectrum of **5f** (101 MHz, CDCl<sub>3</sub>)

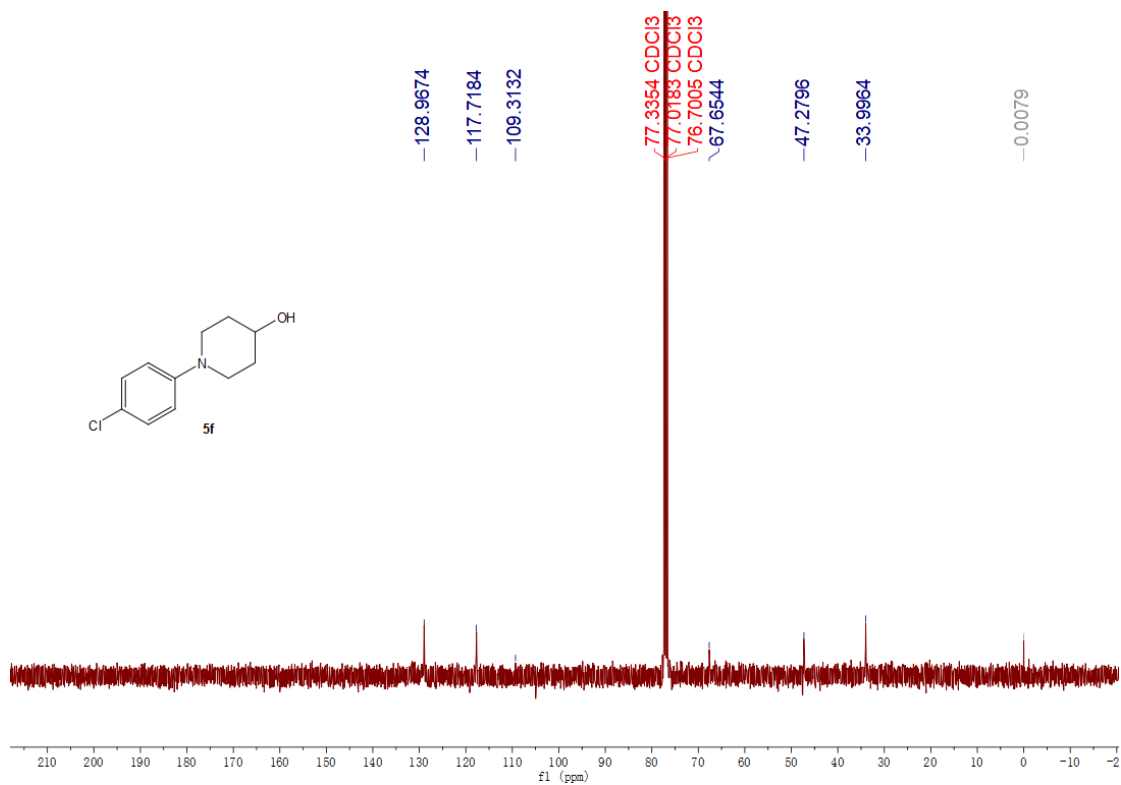

<sup>1</sup>H NMR Spectrum of **5g** (600 MHz, CDCl<sub>3</sub>)

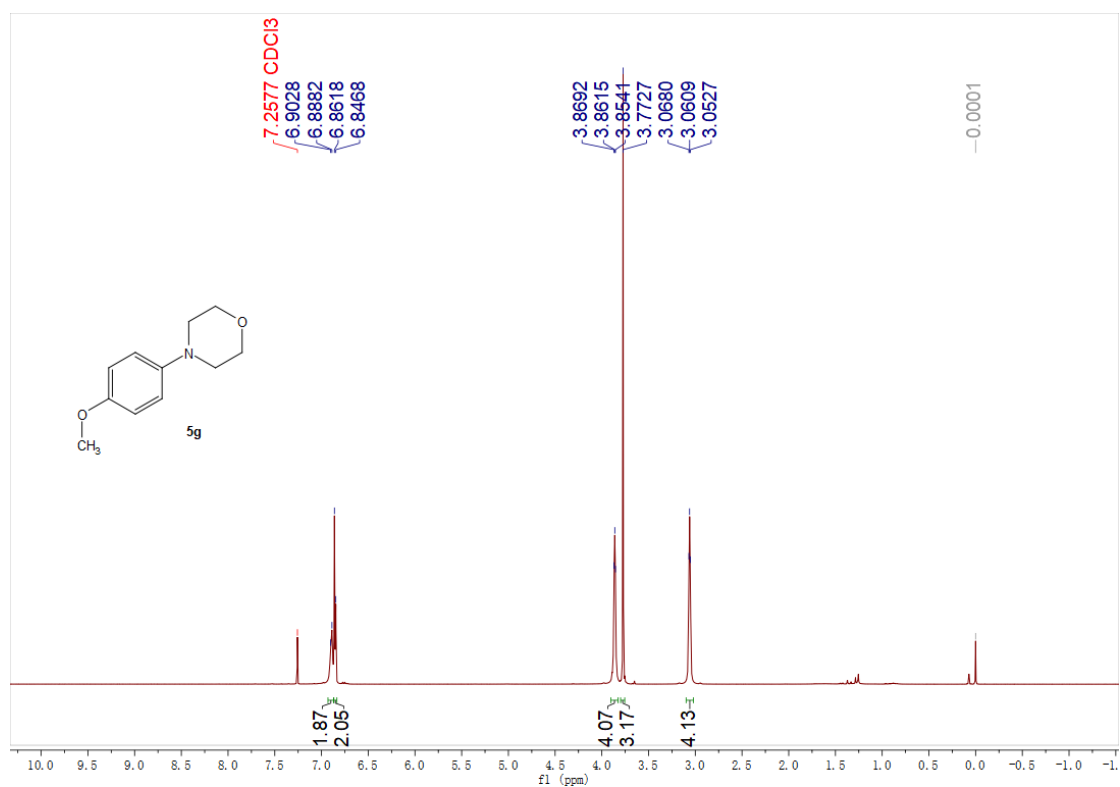

<sup>13</sup>C NMR Spectrum of **5g** (151 MHz, CDCl<sub>3</sub>)

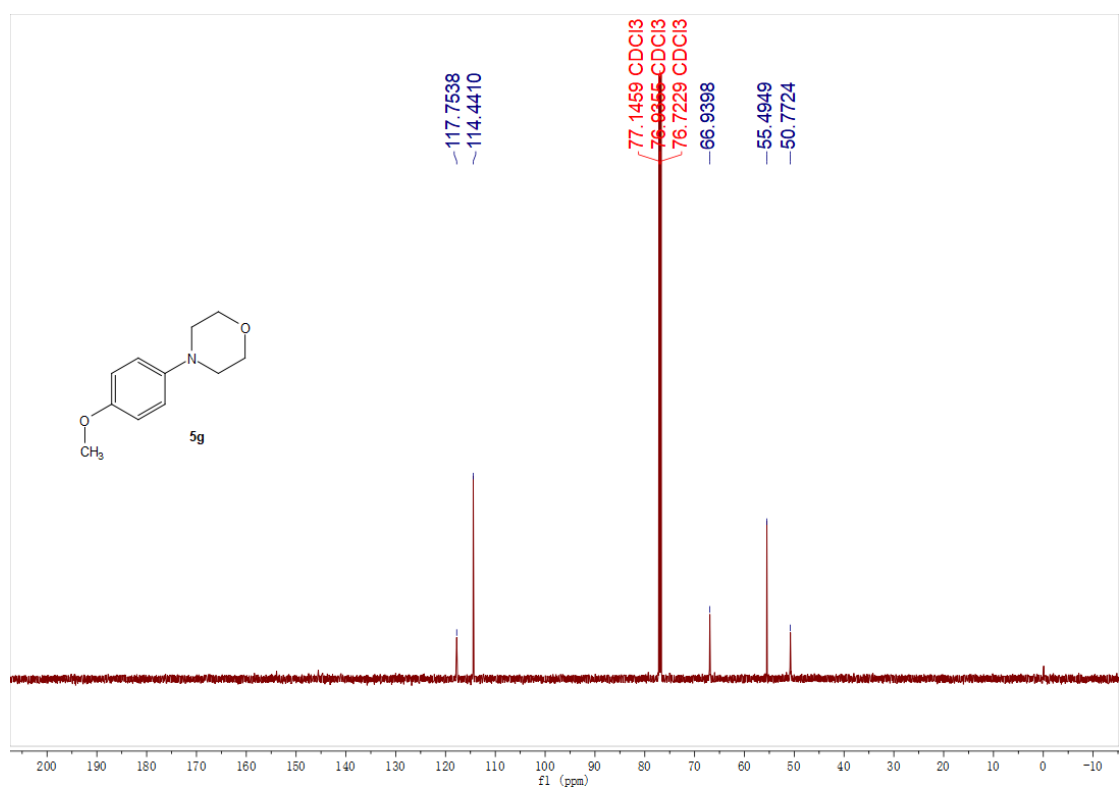

<sup>1</sup>H NMR Spectrum of **5h** (400 MHz, CDCl<sub>3</sub>)

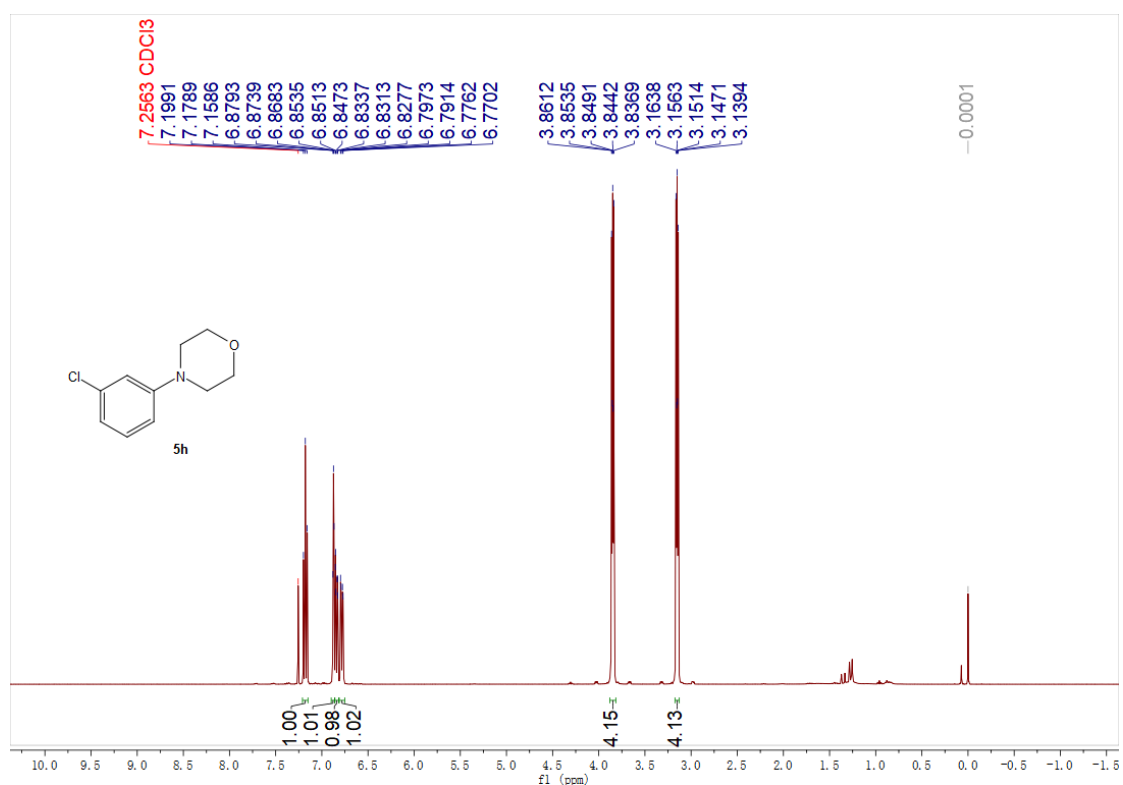

<sup>13</sup>C NMR Spectrum of **5h** (101 MHz, CDCl<sub>3</sub>)

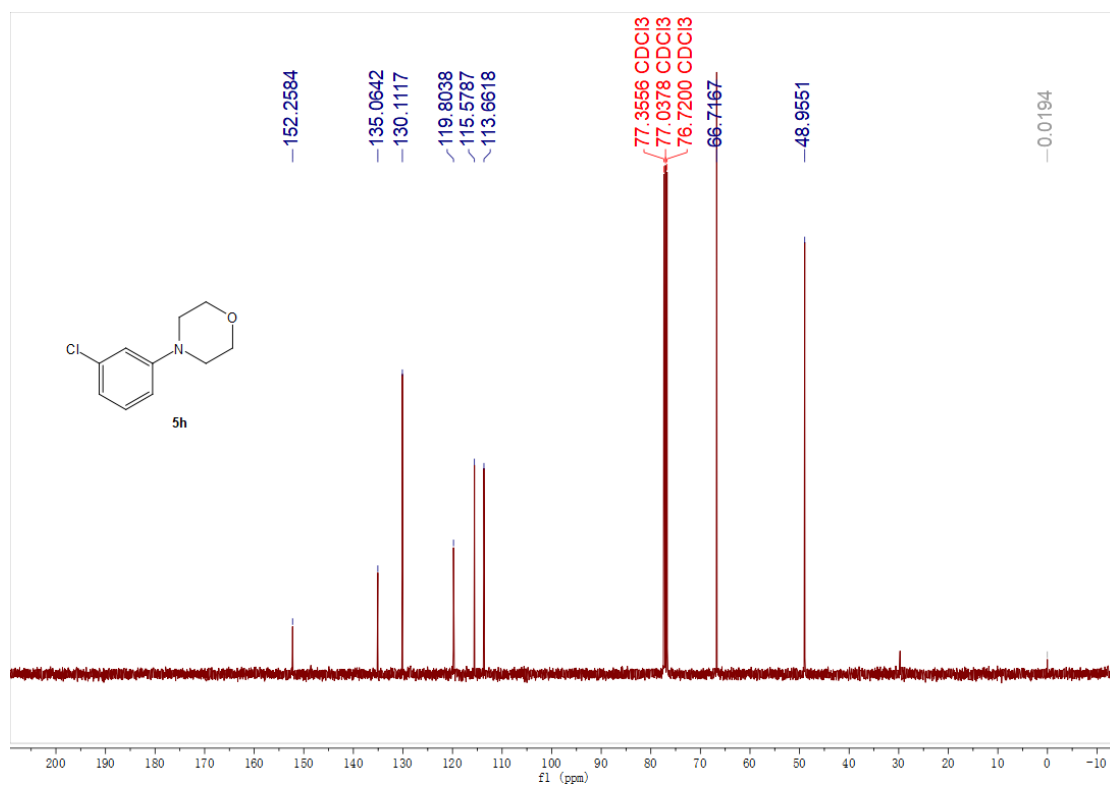



<sup>1</sup>H NMR Spectrum of **5i** (400 MHz, CDCl<sub>3</sub>)

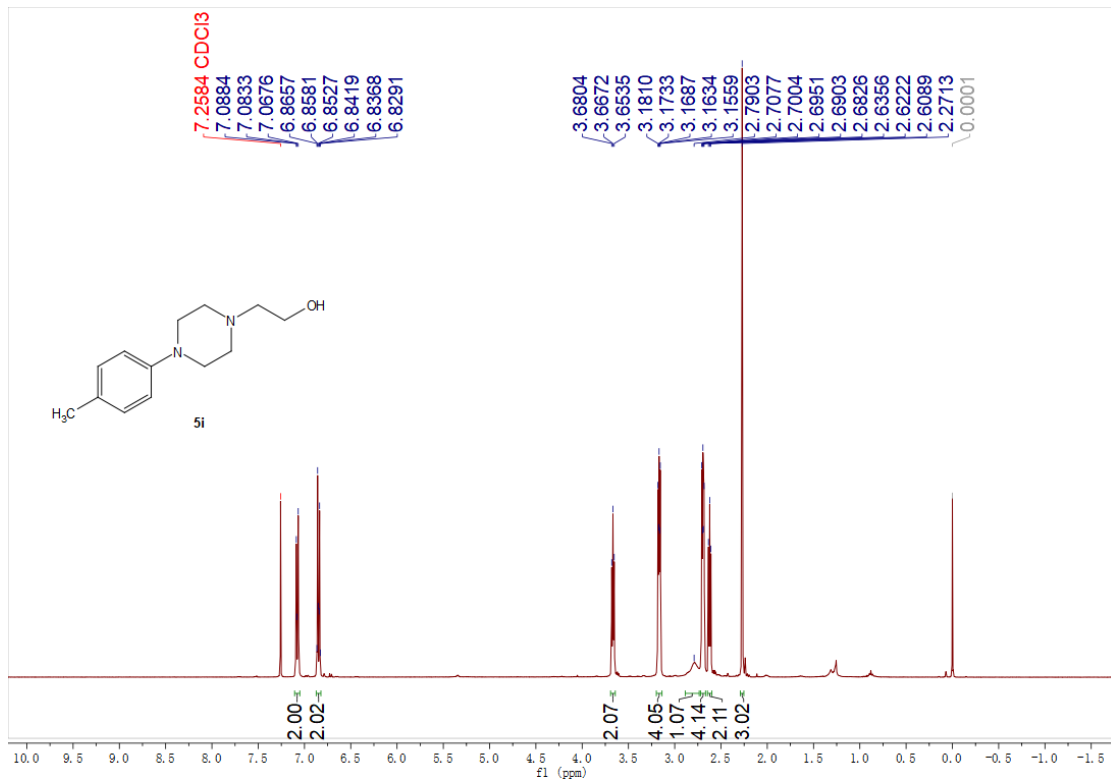

<sup>13</sup>C NMR Spectrum of **5i** (101 MHz, CDCl<sub>3</sub>)

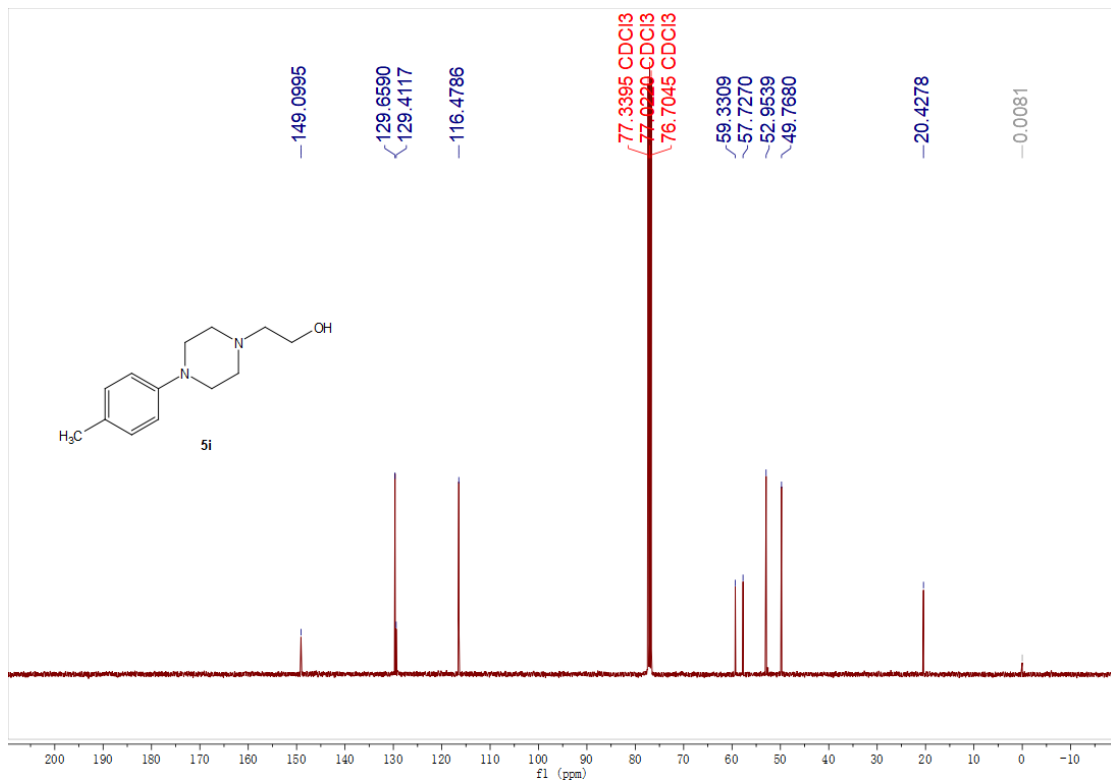

<sup>1</sup>H NMR Spectrum of **5j** (600 MHz, CDCl<sub>3</sub>)

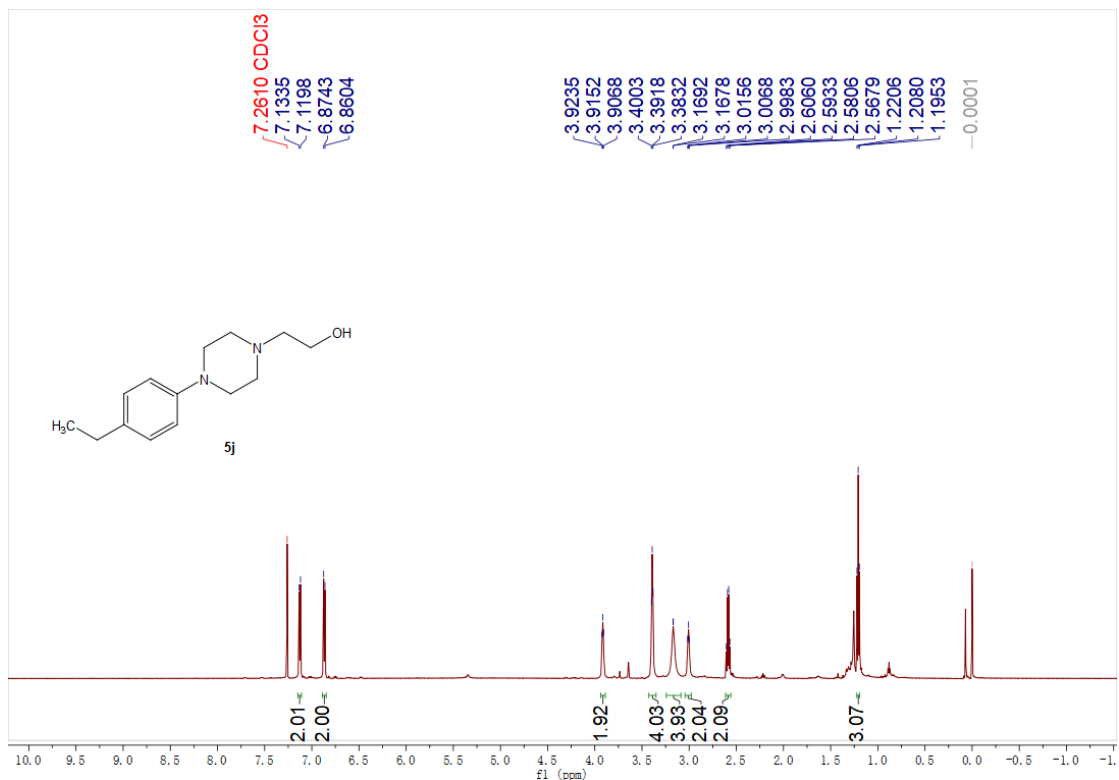

<sup>13</sup>C NMR Spectrum of **5j** (151 MHz, CDCl<sub>3</sub>)

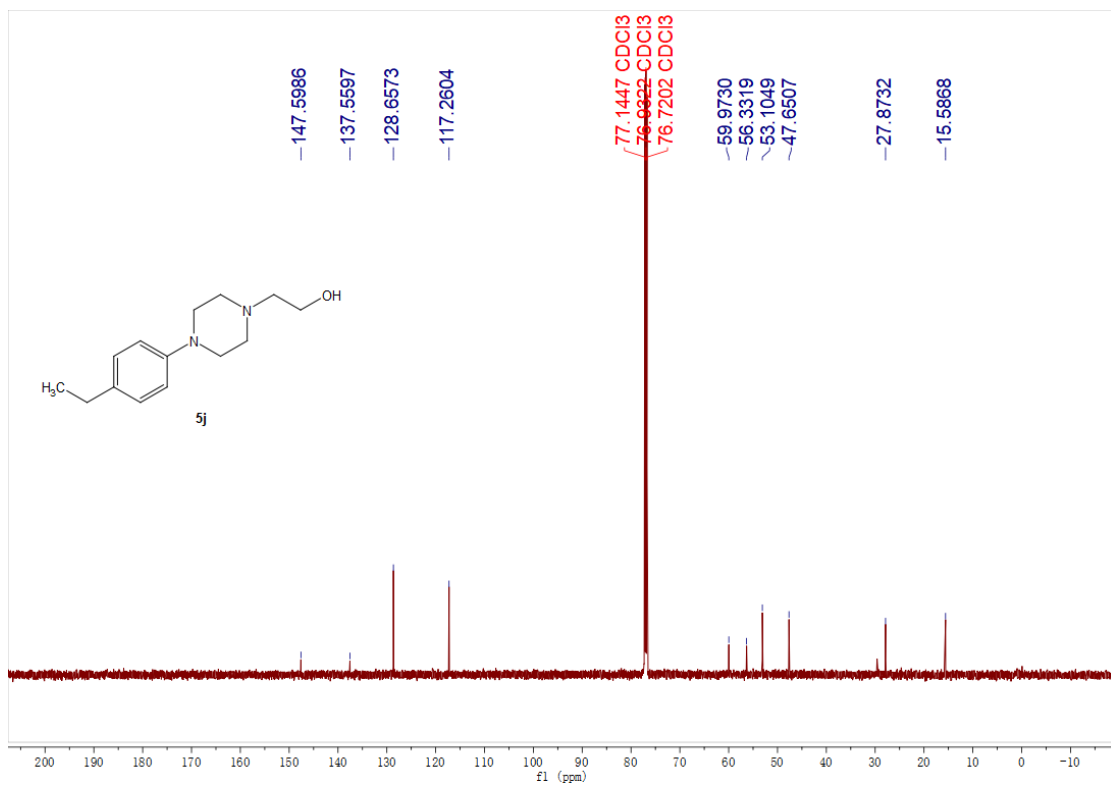

<sup>1</sup>H NMR Spectrum of **5k** (600 MHz, CDCl<sub>3</sub>)

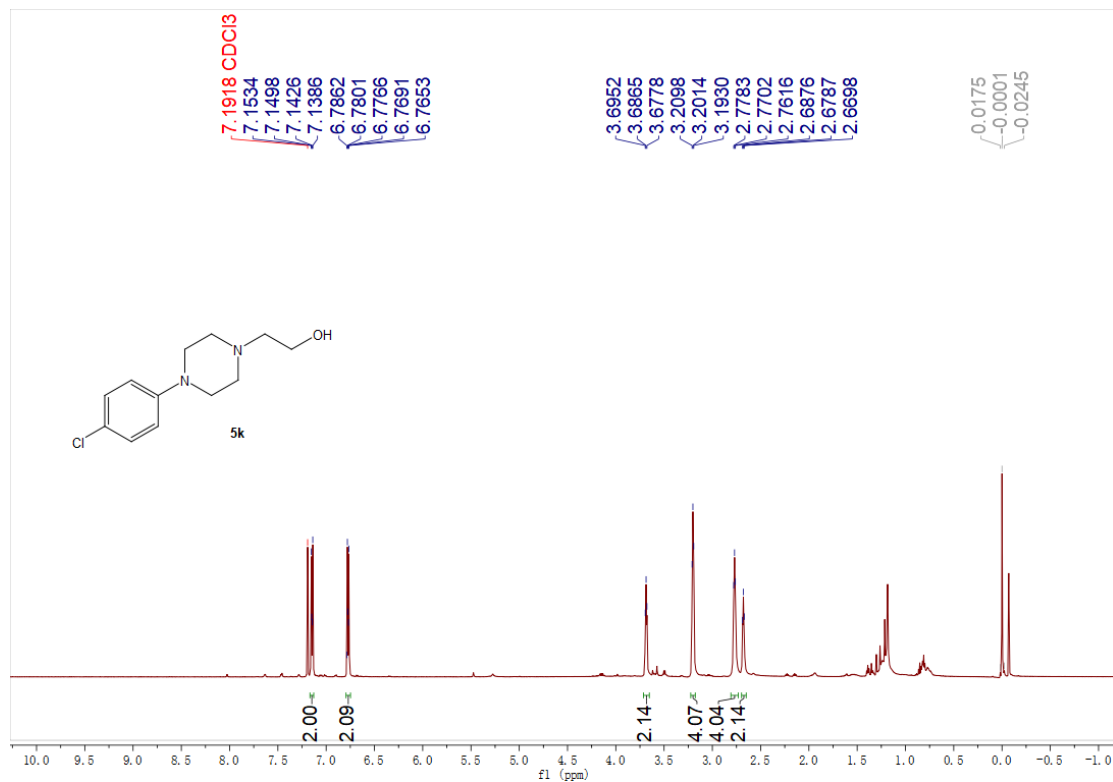

<sup>13</sup>C NMR Spectrum of **5k** (151 MHz, CDCl<sub>3</sub>)

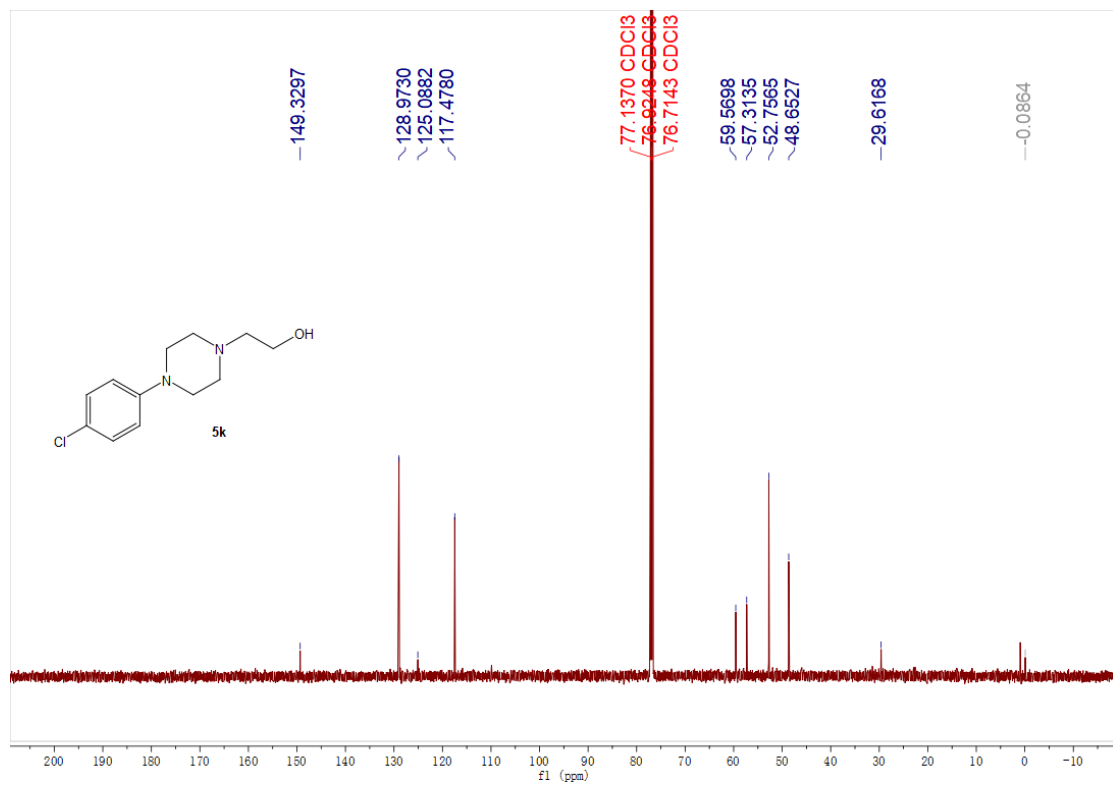

<sup>1</sup>H NMR Spectrum of **5I** (600 MHz, CDCl<sub>3</sub>)

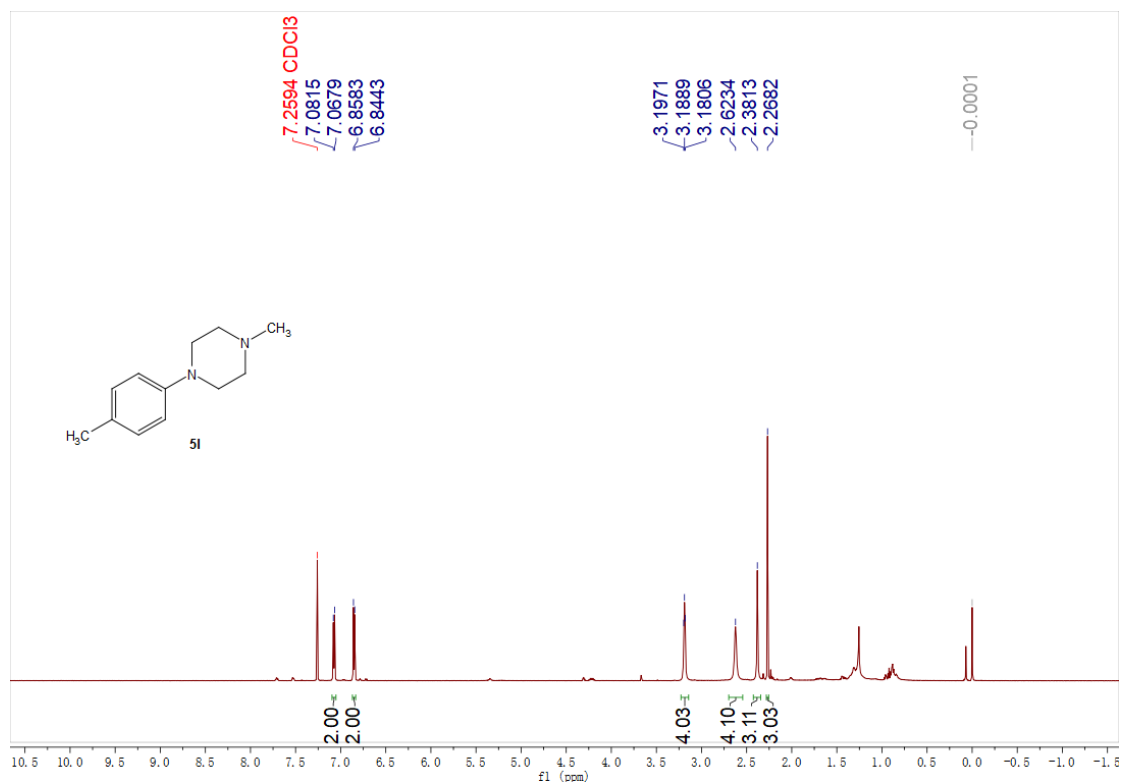

<sup>13</sup>C NMR Spectrum of **5I** (151 MHz, CDCl<sub>3</sub>)

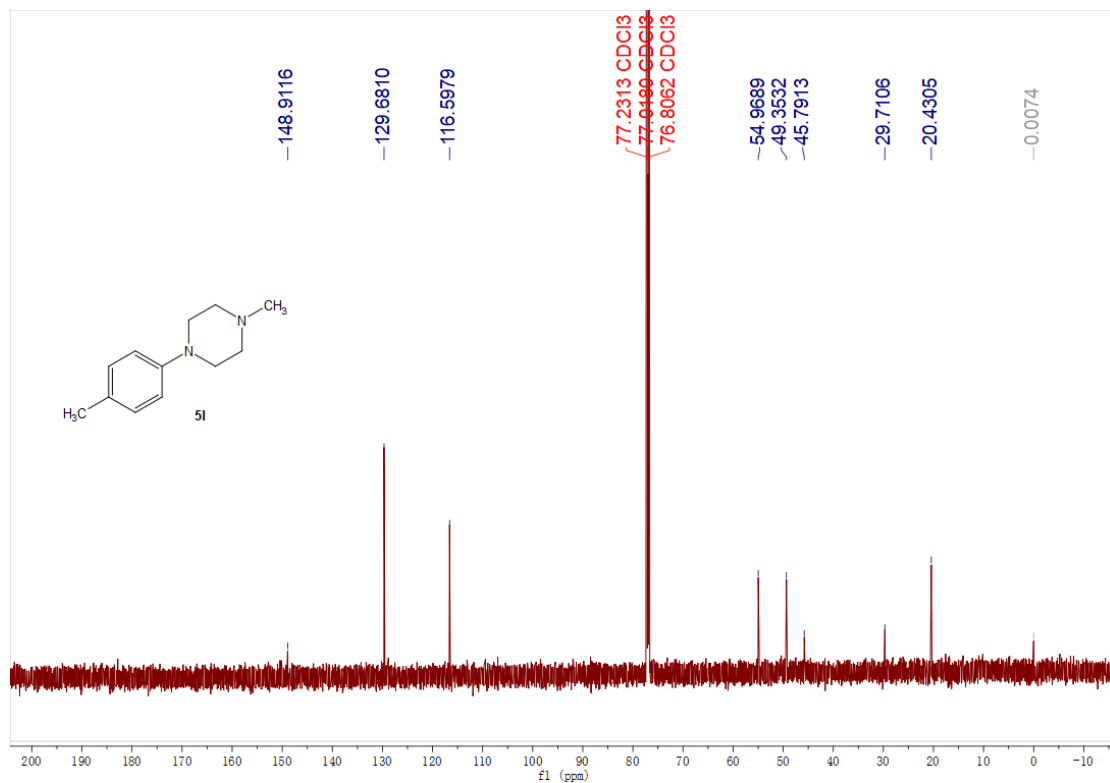

<sup>1</sup>H NMR Spectrum of **5m** (600 MHz, CDCl<sub>3</sub>)

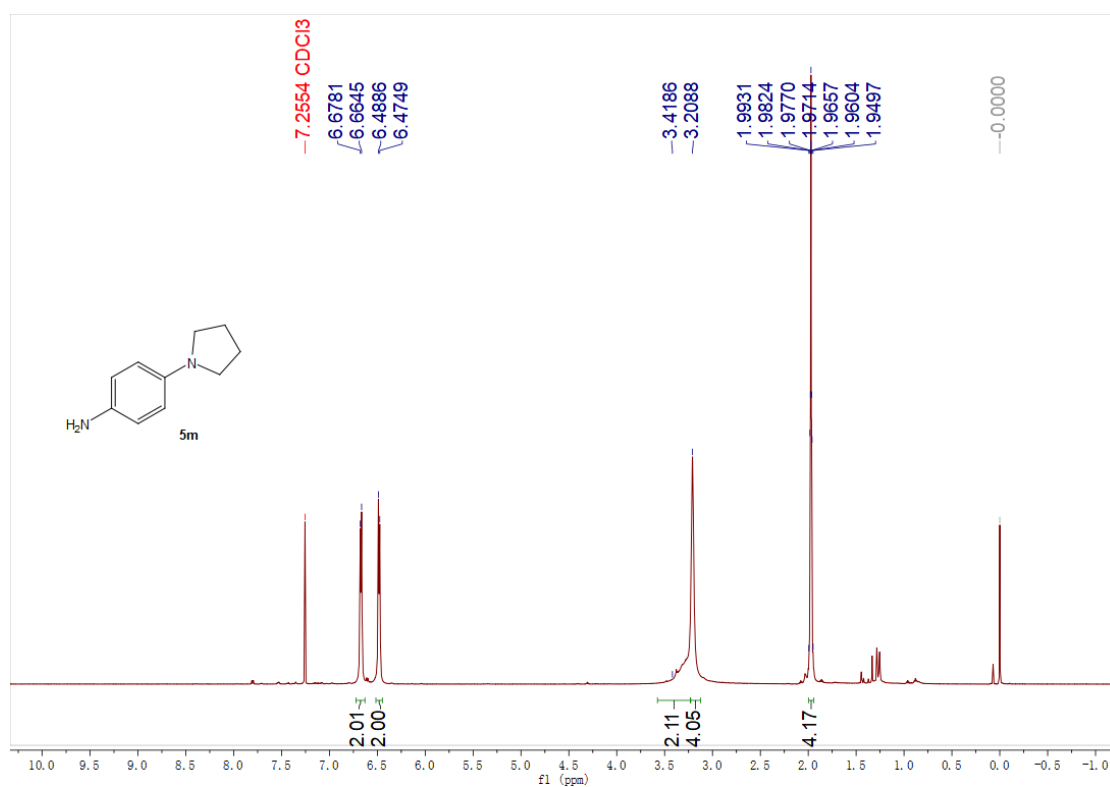

<sup>13</sup>C NMR Spectrum of **5m** (151 MHz, CDCl<sub>3</sub>)

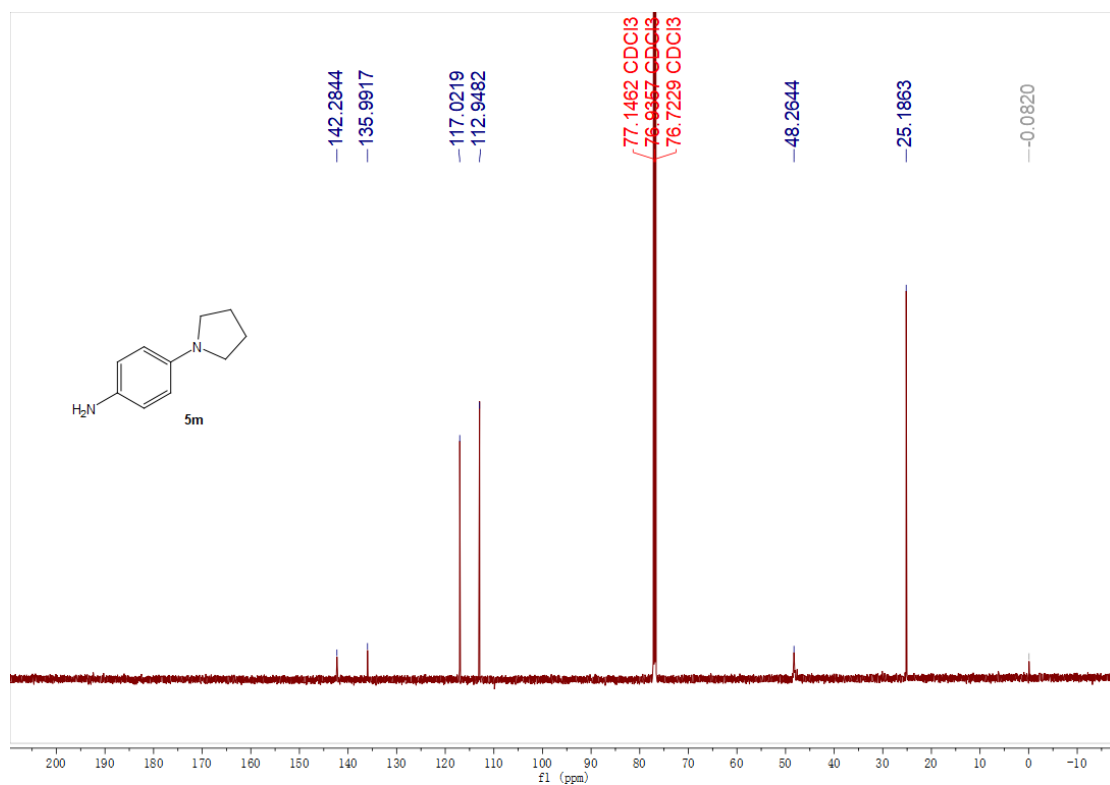

<sup>1</sup>H NMR Spectrum of **5n** (400 MHz, CDCl<sub>3</sub>)

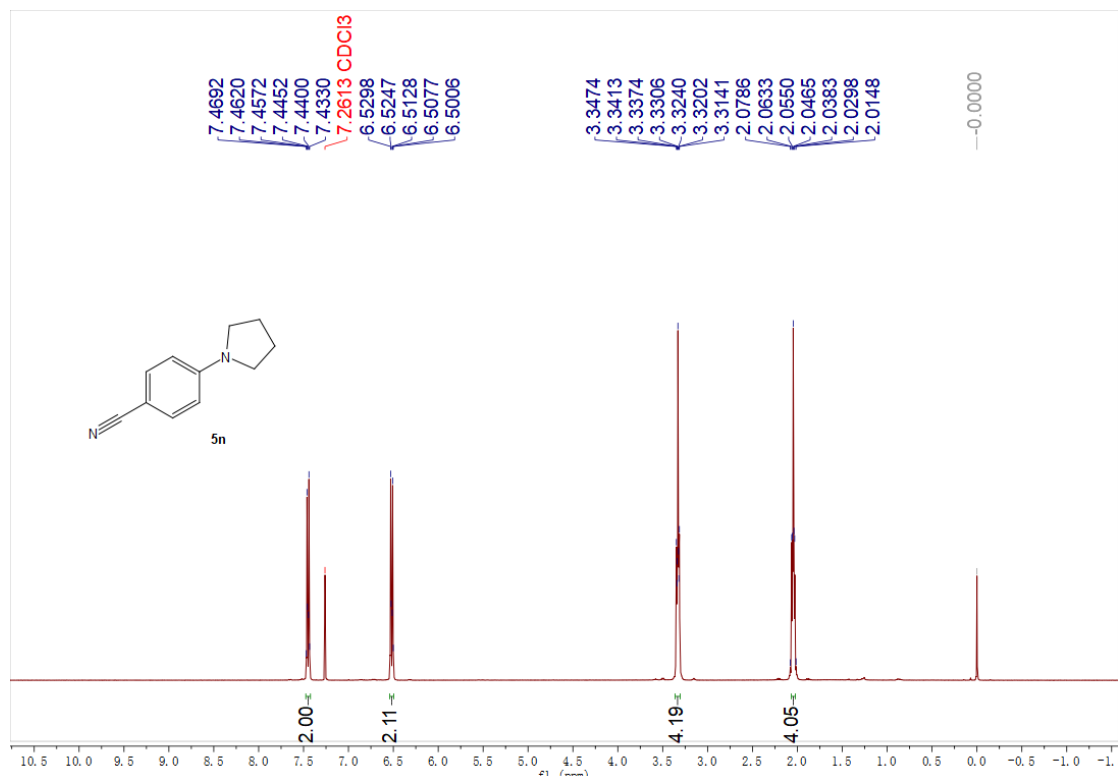

<sup>13</sup>C NMR Spectrum of **5n** (101 MHz, CDCl<sub>3</sub>)

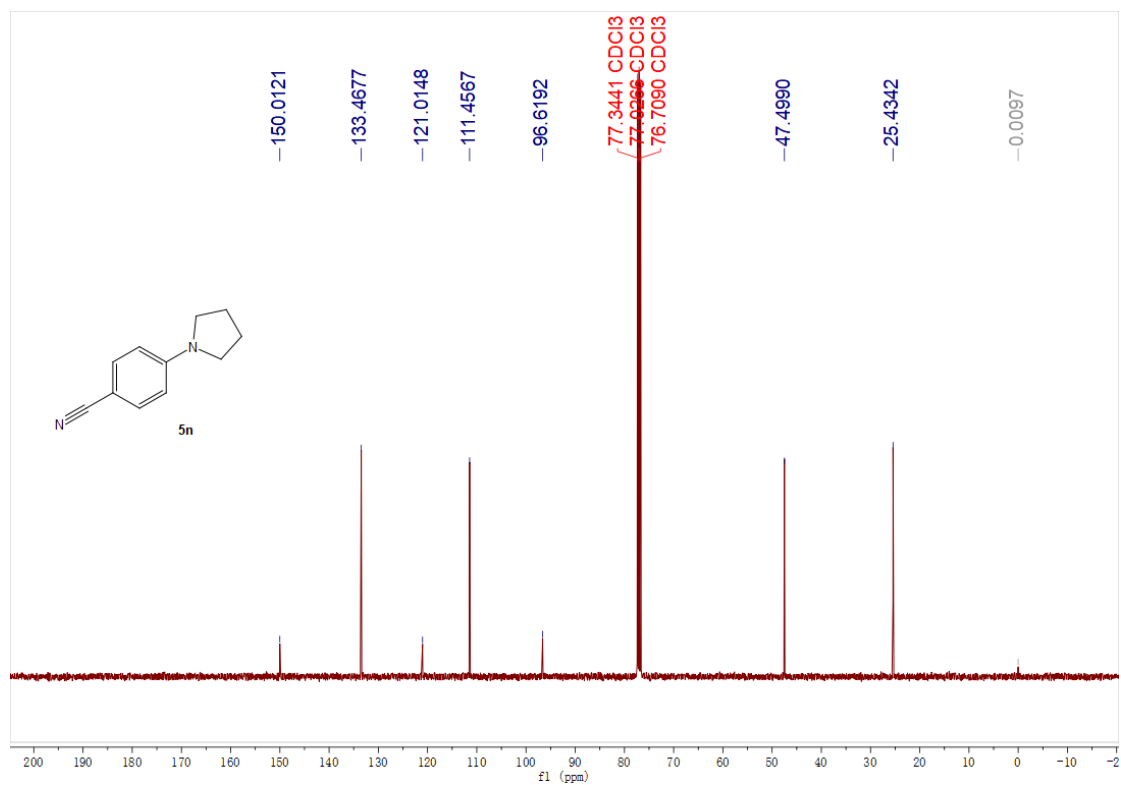

<sup>1</sup>H NMR Spectrum of **5o** (400 MHz, CDCl<sub>3</sub>)

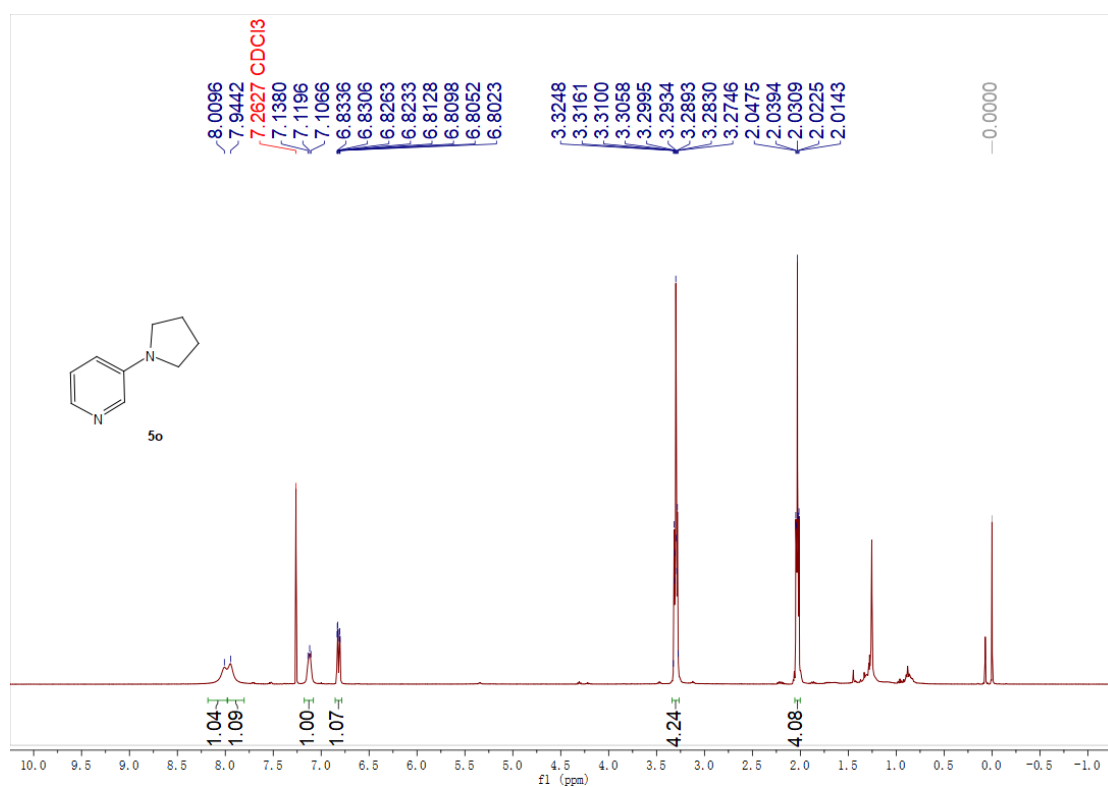

<sup>13</sup>C NMR Spectrum of **5o** (101 MHz, CDCl<sub>3</sub>)

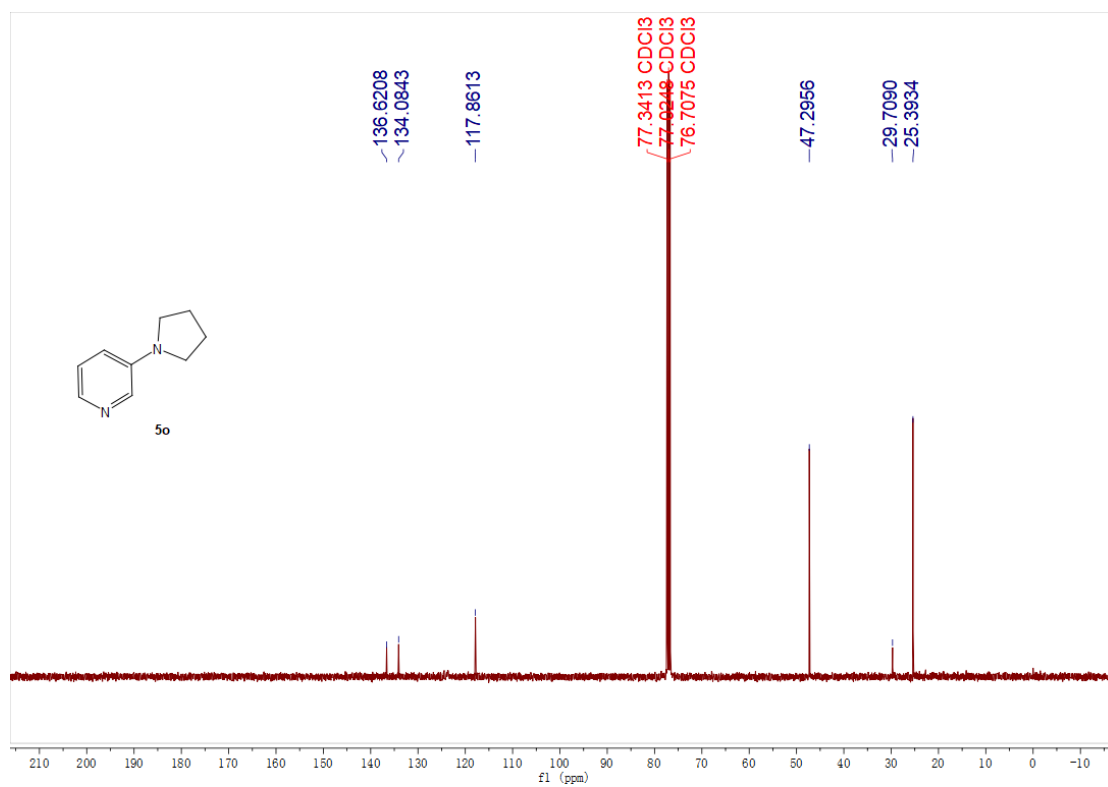

<sup>1</sup>H NMR Spectrum of **5p** (600 MHz, CDCl<sub>3</sub>)

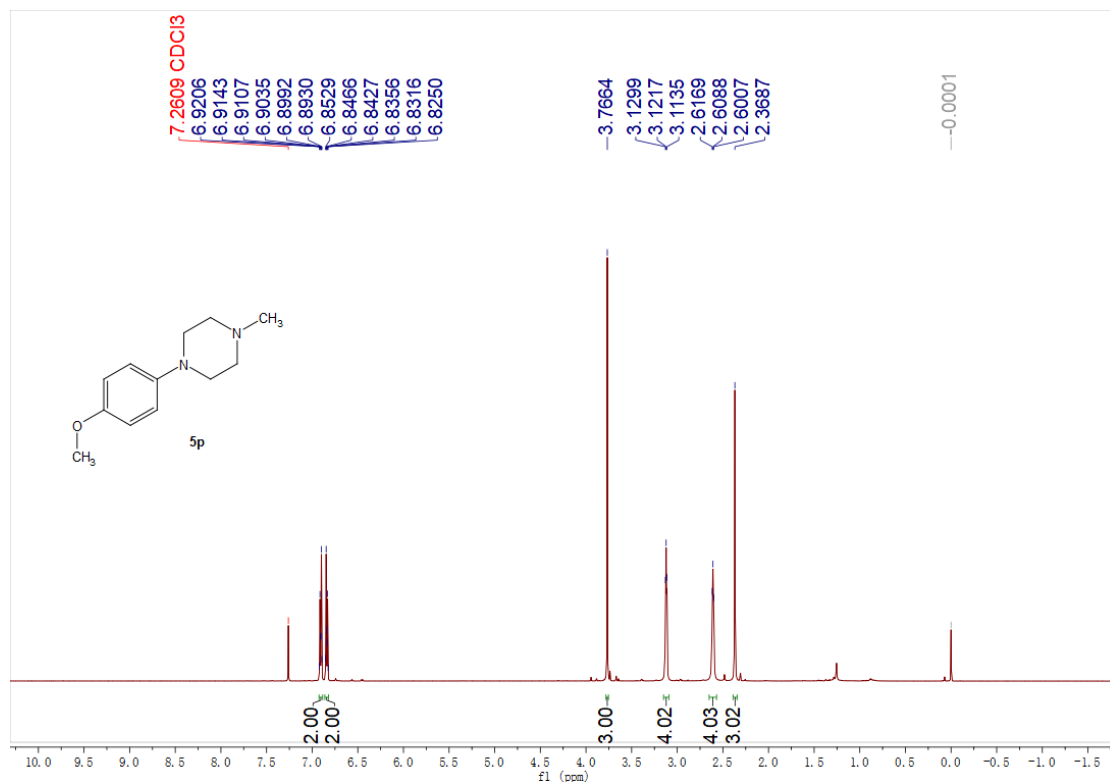

<sup>13</sup>C NMR Spectrum of **5p** (151 MHz, CDCl<sub>3</sub>)

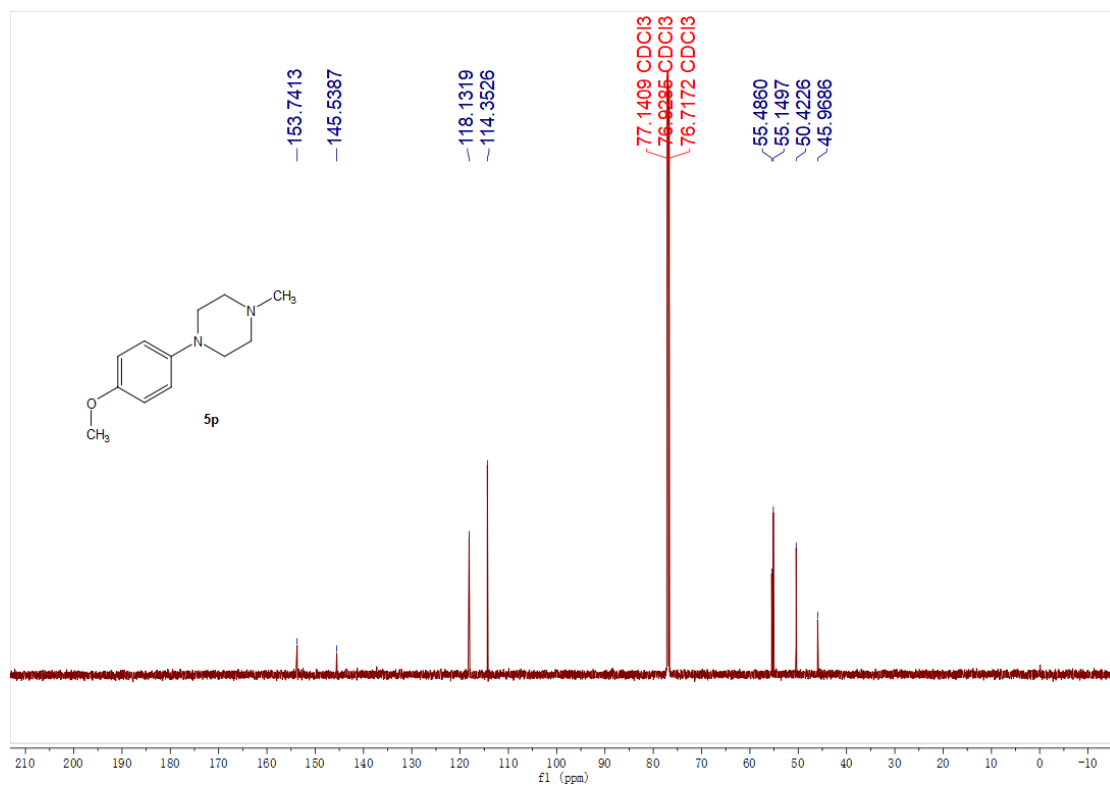



<sup>1</sup>H NMR Spectrum of **5q** (400 MHz, CDCl<sub>3</sub>)

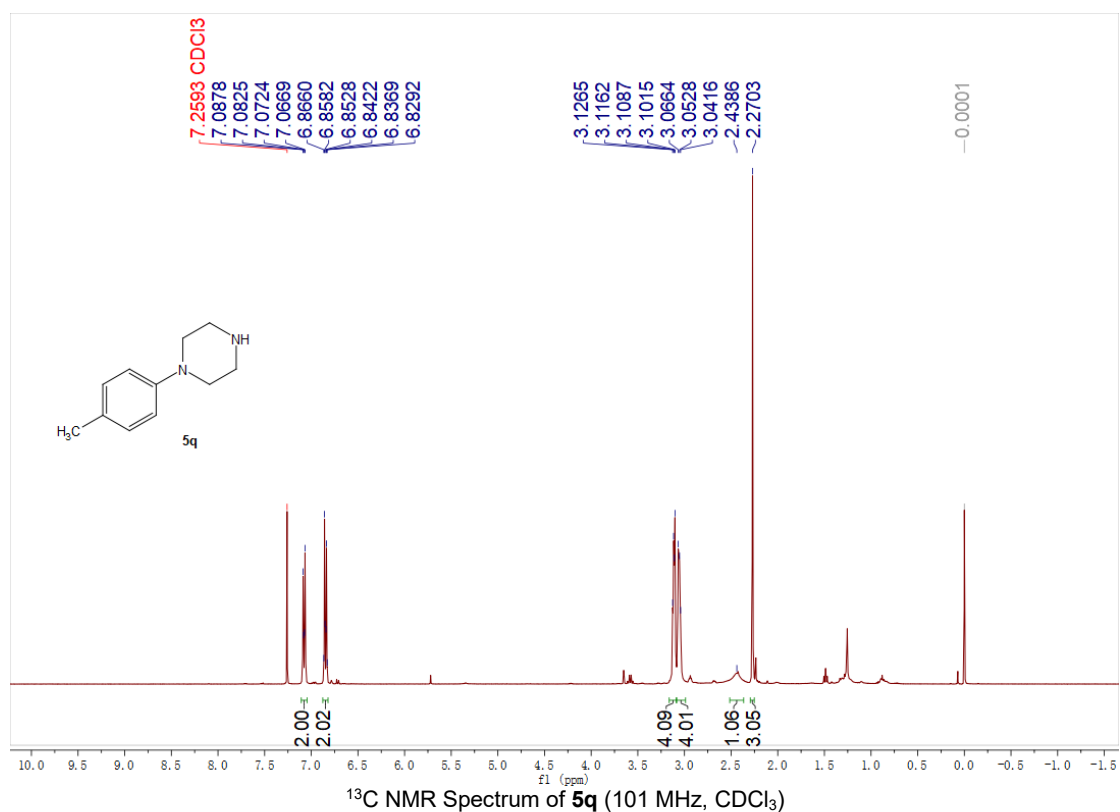

<sup>13</sup>C NMR Spectrum of **5q** (101 MHz, CDCl<sub>3</sub>)

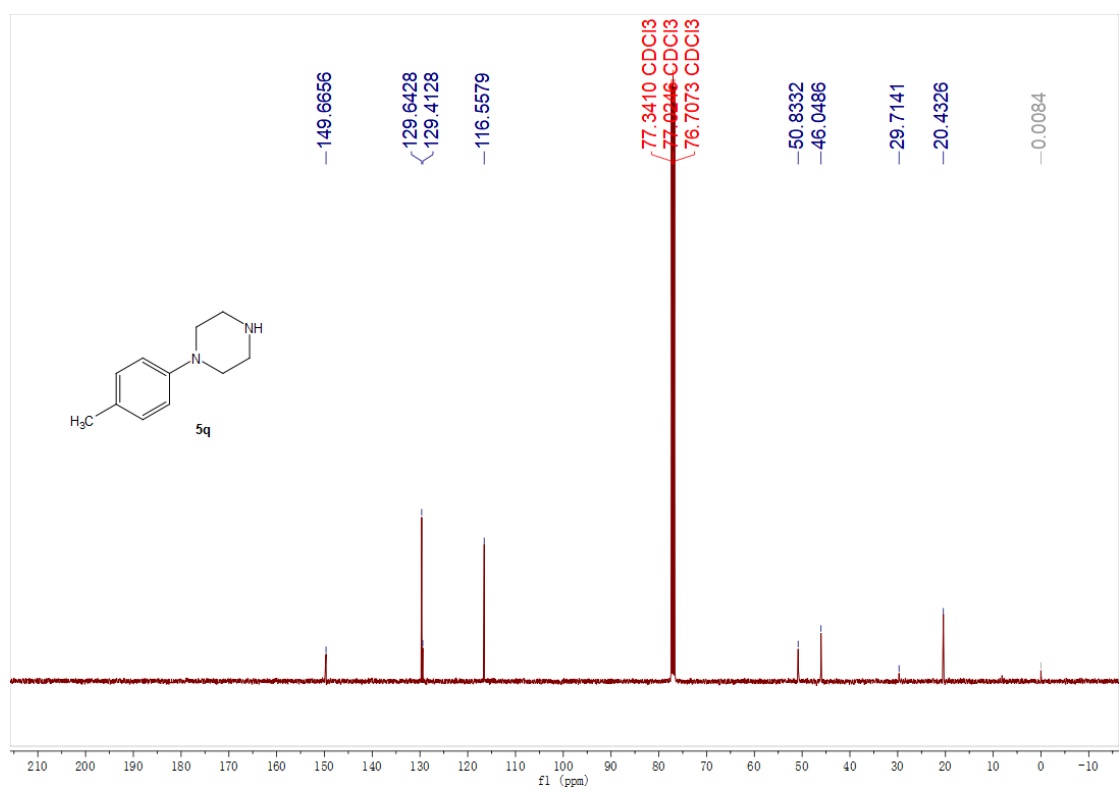

<sup>1</sup>H NMR Spectrum of **5r** (600 MHz, CDCl<sub>3</sub>)

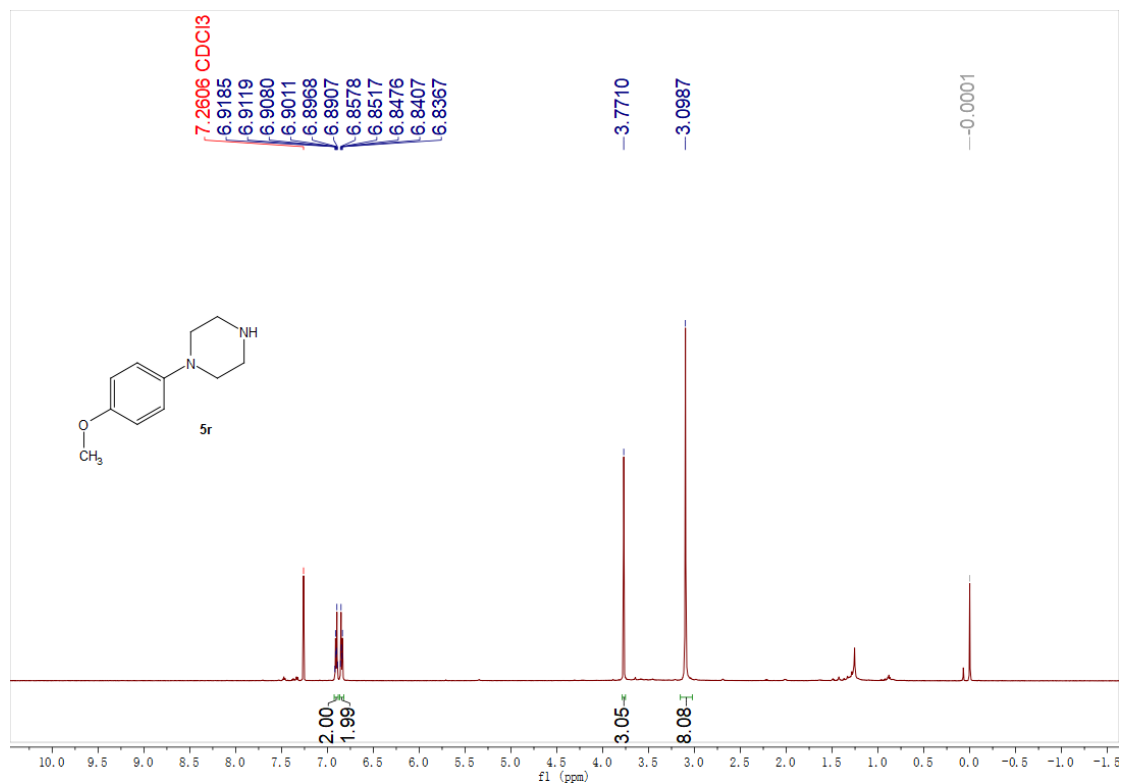

<sup>13</sup>C NMR Spectrum of **5r** (151 MHz, CDCl<sub>3</sub>)

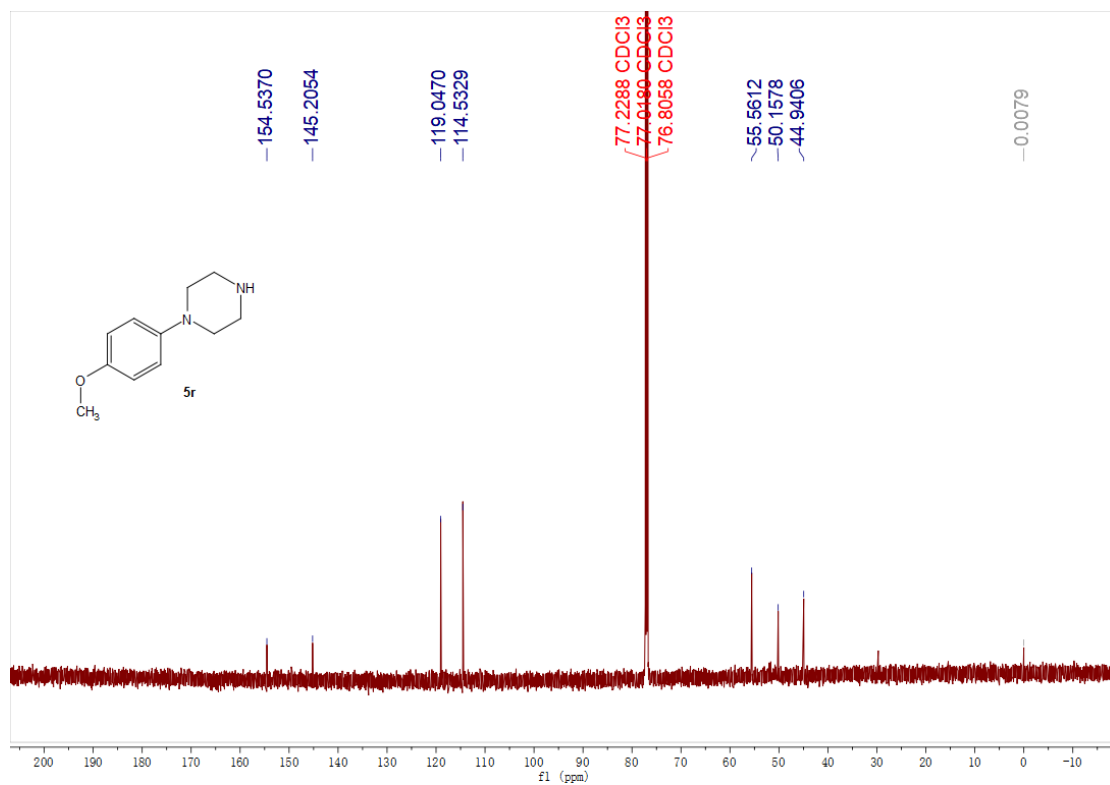

<sup>1</sup>H NMR Spectrum of **5s** (600 MHz, CDCl<sub>3</sub>)

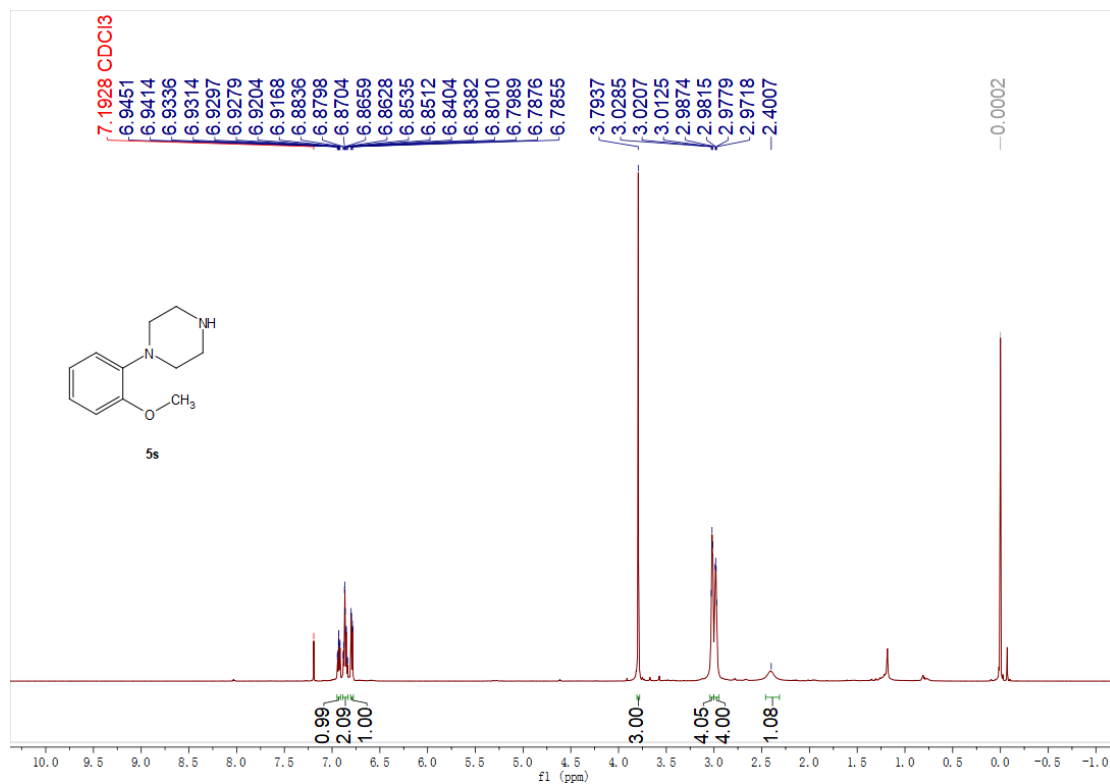

<sup>13</sup>C NMR Spectrum of **5s** (151 MHz, CDCl<sub>3</sub>)

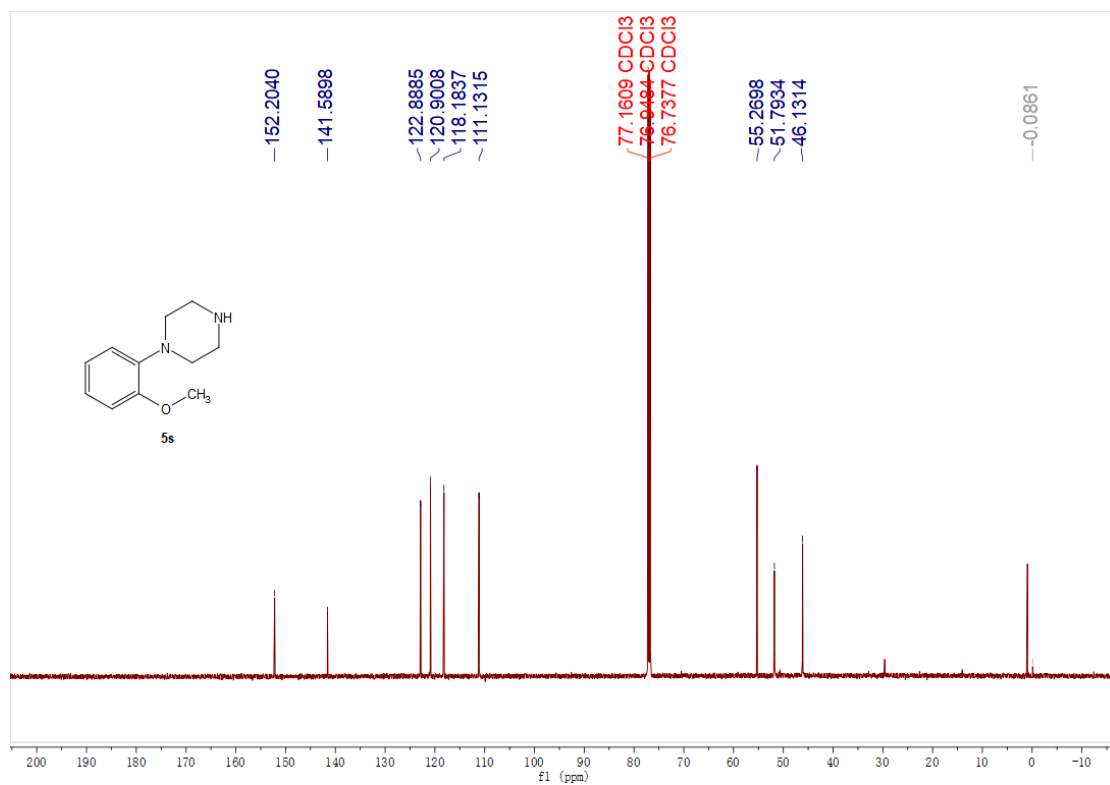

<sup>1</sup>H NMR Spectrum of **5t** (600 MHz, CDCl<sub>3</sub>)

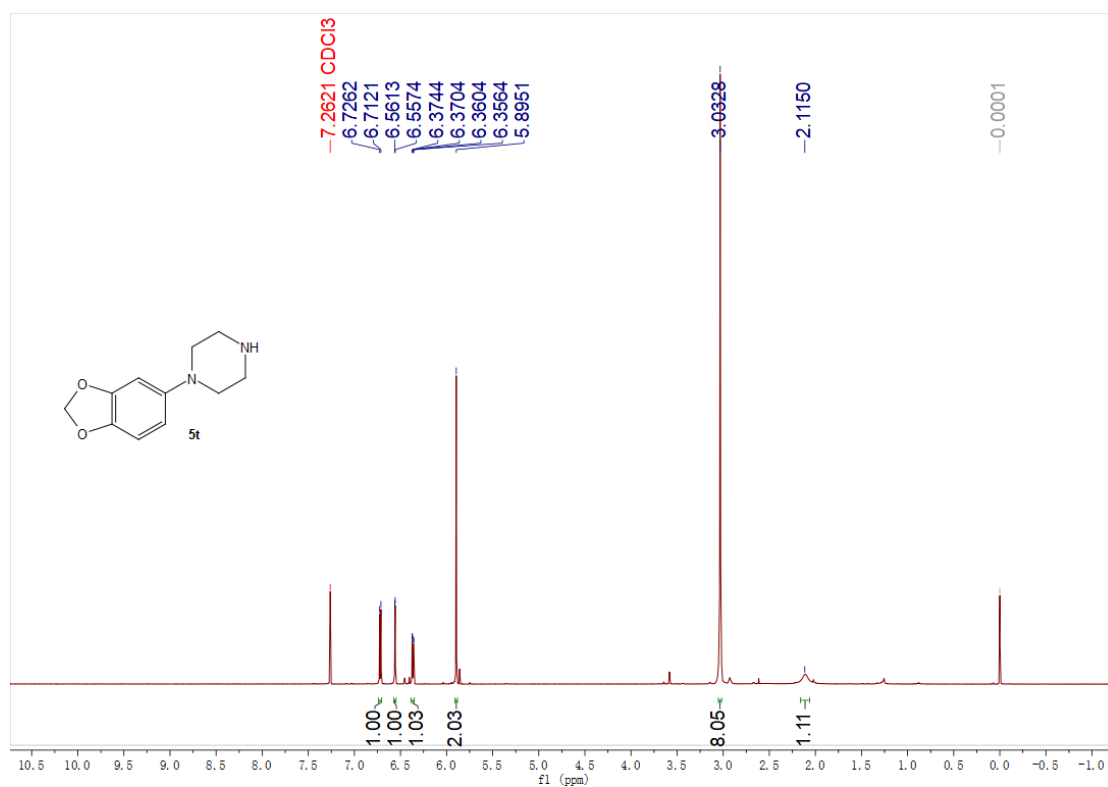

<sup>13</sup>C NMR Spectrum of **5t** (151 MHz, CDCl<sub>3</sub>)

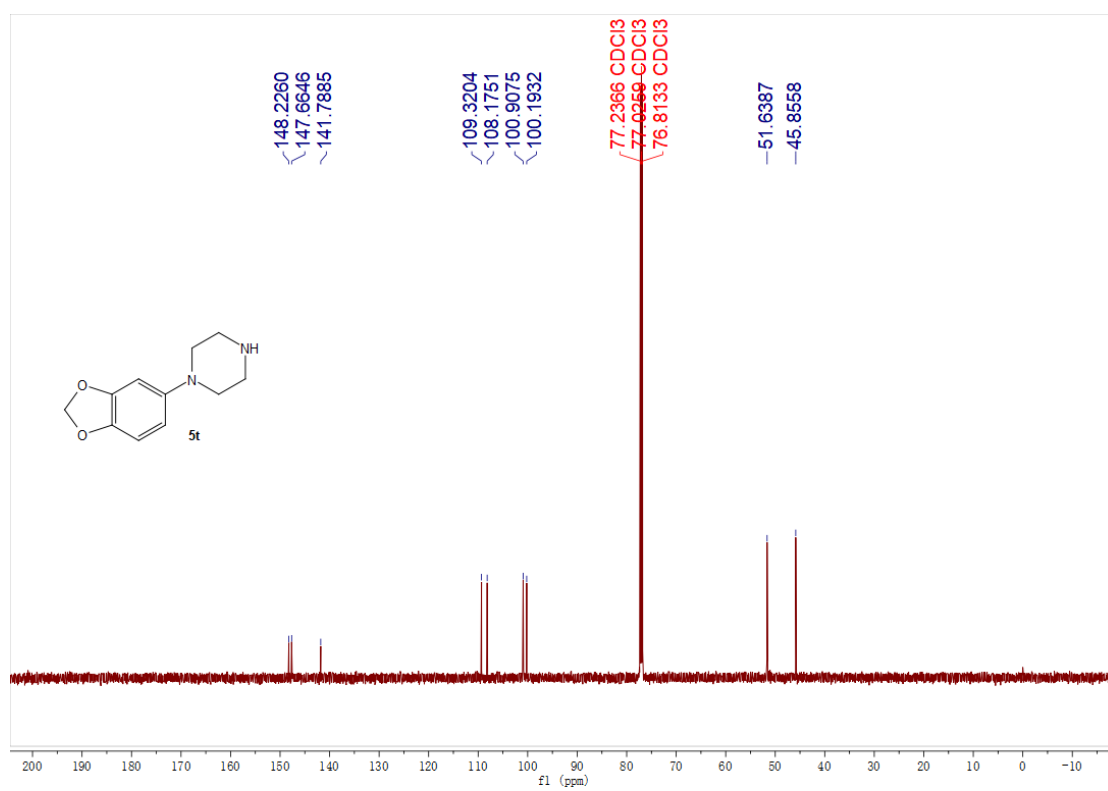

<sup>1</sup>H NMR Spectrum of **5u** (400 MHz, CDCl<sub>3</sub>)

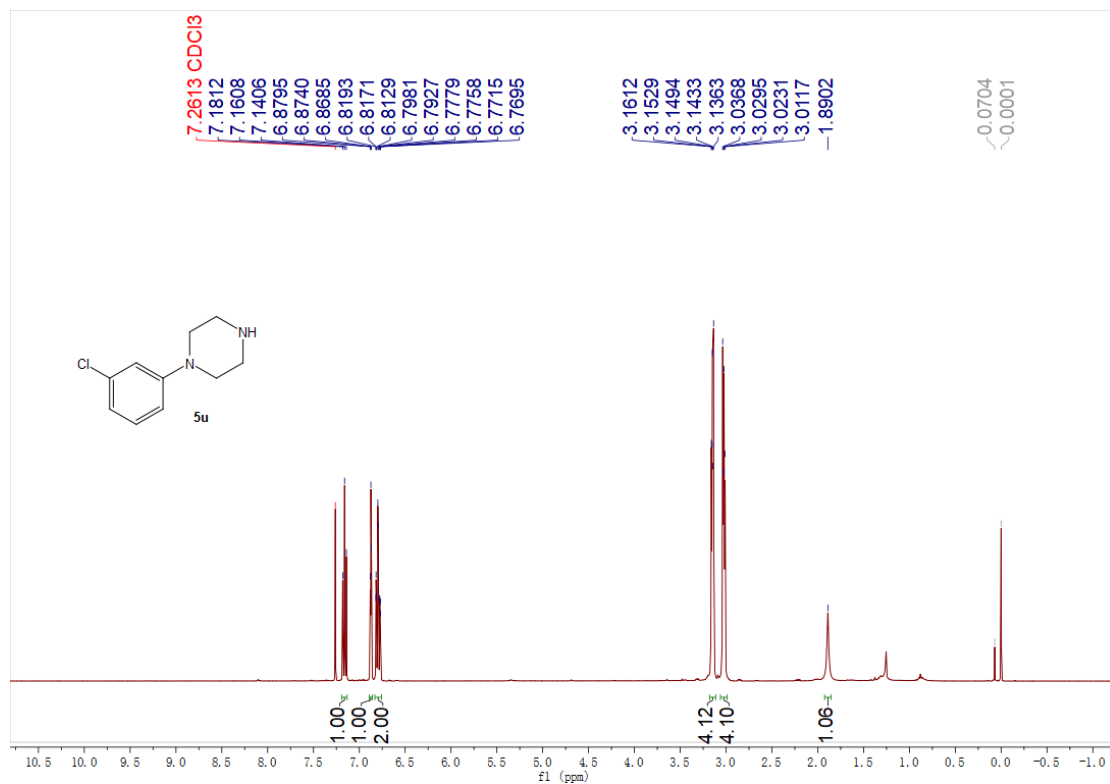

<sup>13</sup>C NMR Spectrum of **5u** (101 MHz, CDCl<sub>3</sub>)

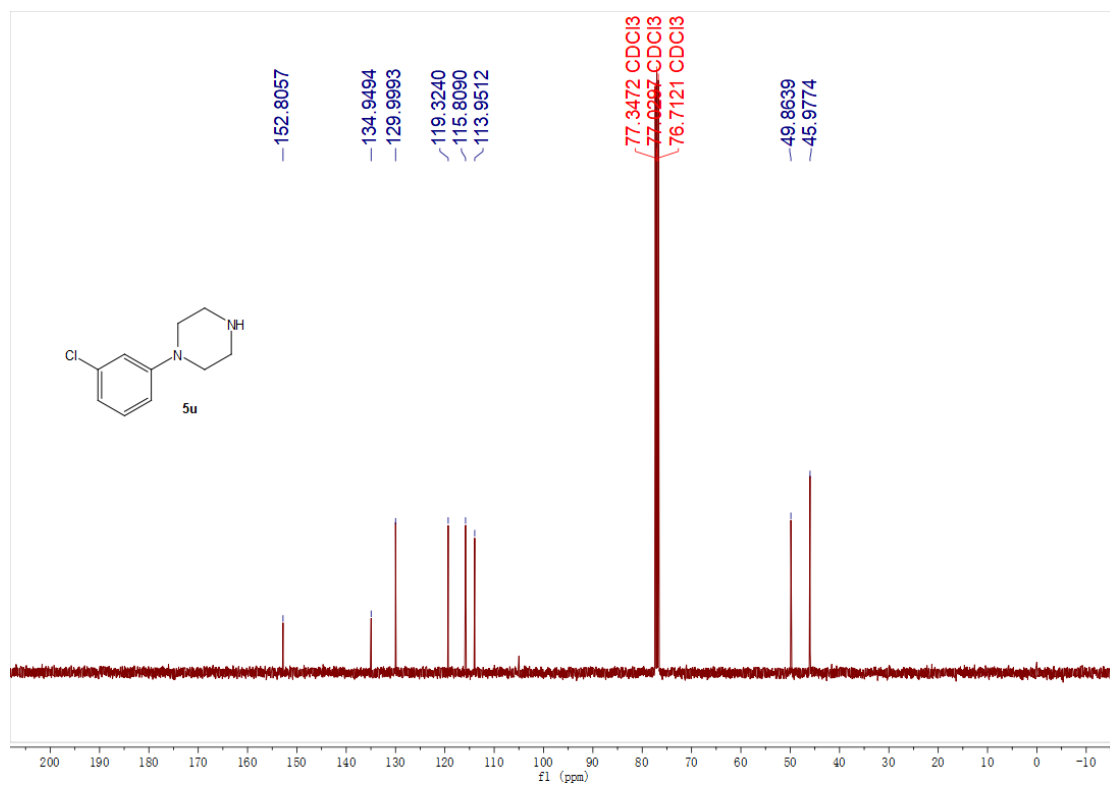

<sup>1</sup>H NMR Spectrum of **5v** (600 MHz, CDCl<sub>3</sub>)

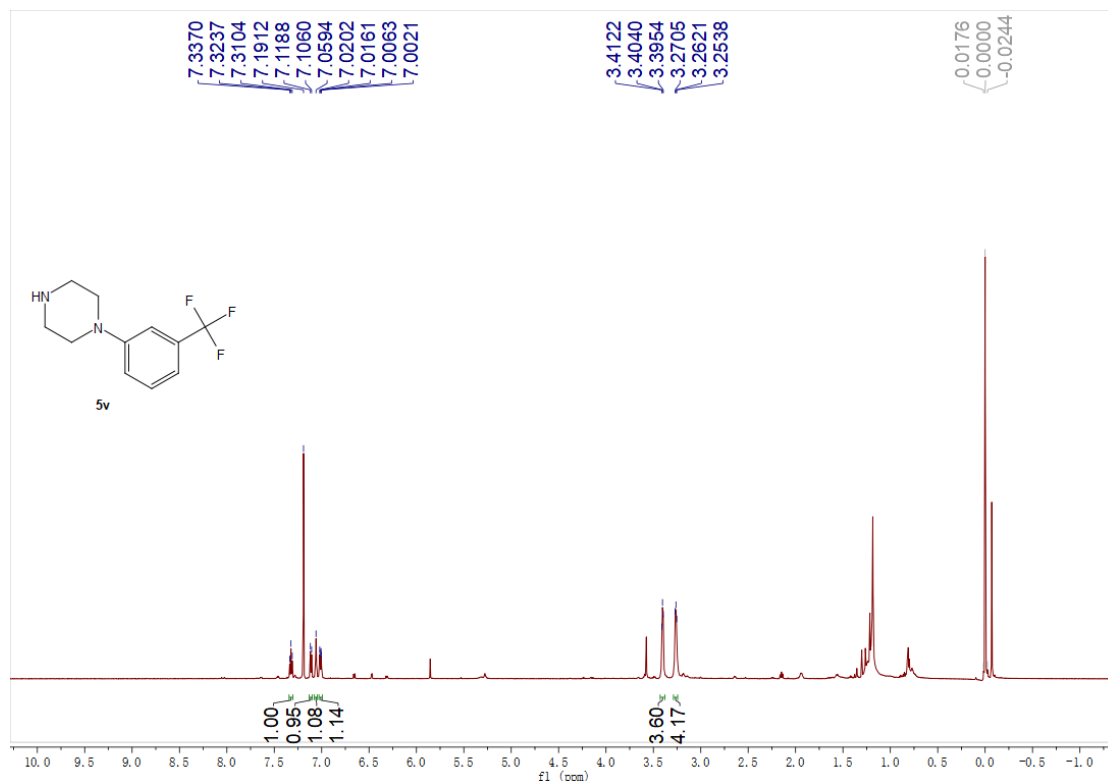

<sup>13</sup>C NMR Spectrum of **5v** (151 MHz, CDCl<sub>3</sub>)

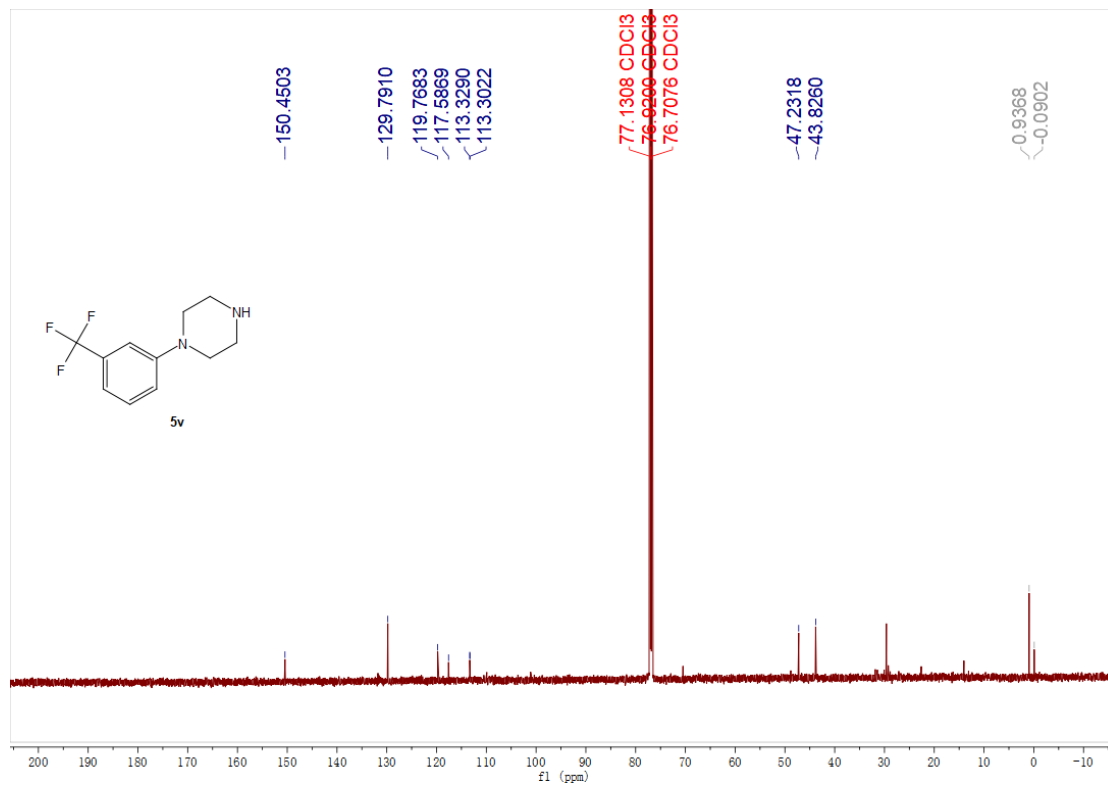

<sup>1</sup>H NMR Spectrum of **5w** (600 MHz, CDCl<sub>3</sub>)

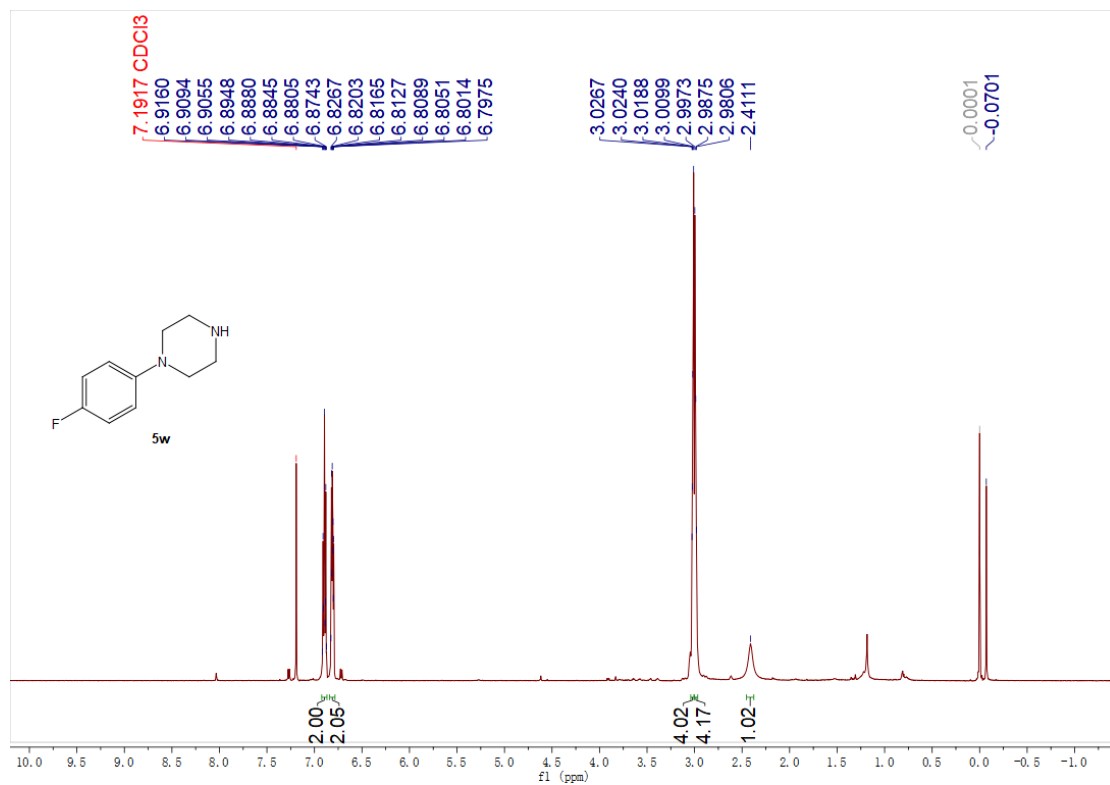

<sup>13</sup>C NMR Spectrum of **5w** (101 MHz, CDCl<sub>3</sub>)

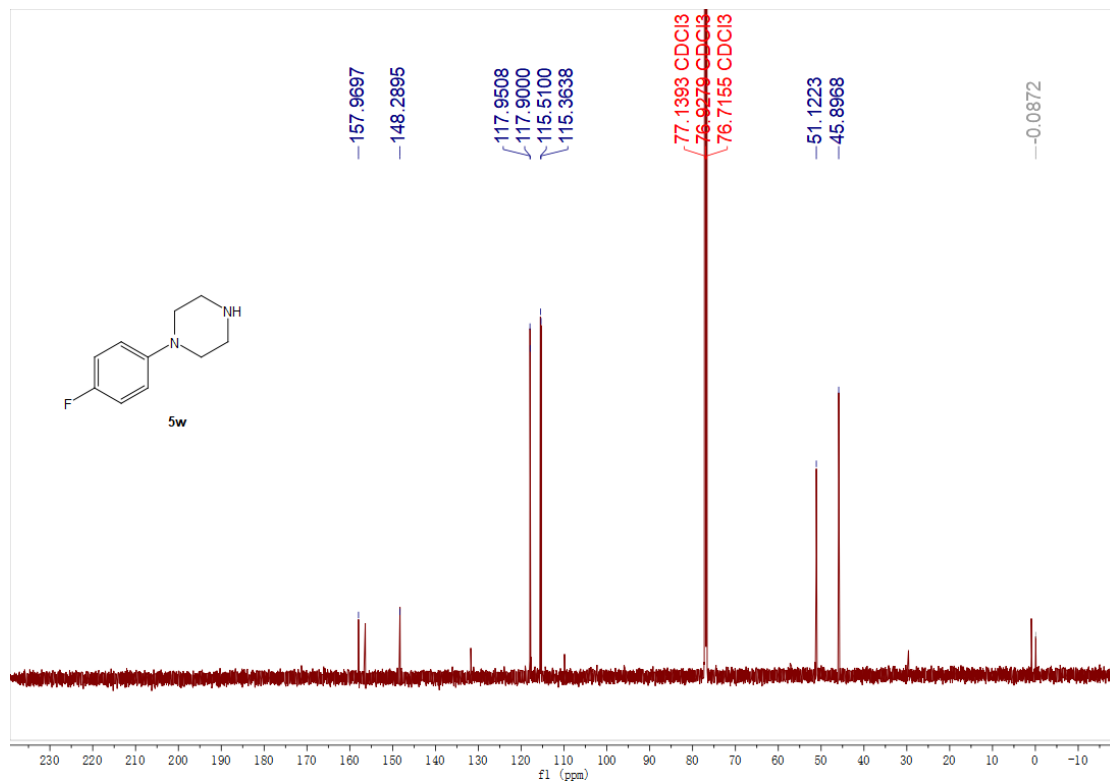

<sup>1</sup>H NMR Spectrum of **6a** (400 MHz, CDCl<sub>3</sub>)

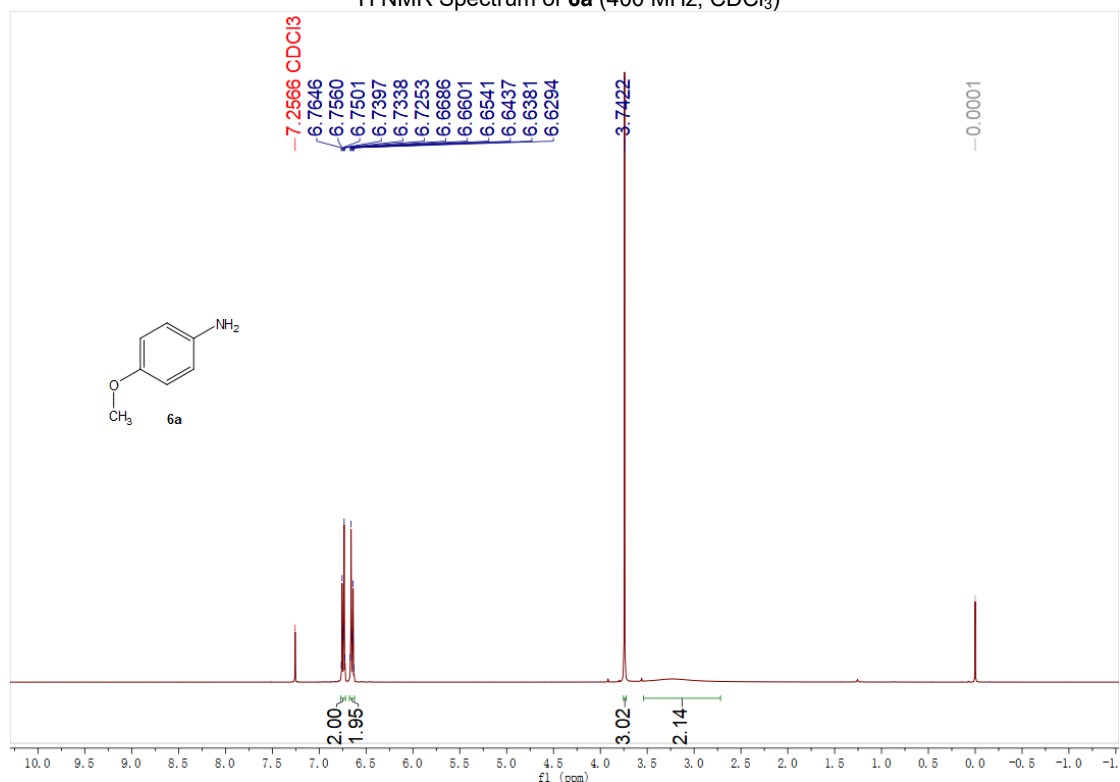

<sup>13</sup>C NMR Spectrum of **6a** (151 MHz, CDCl<sub>3</sub>)

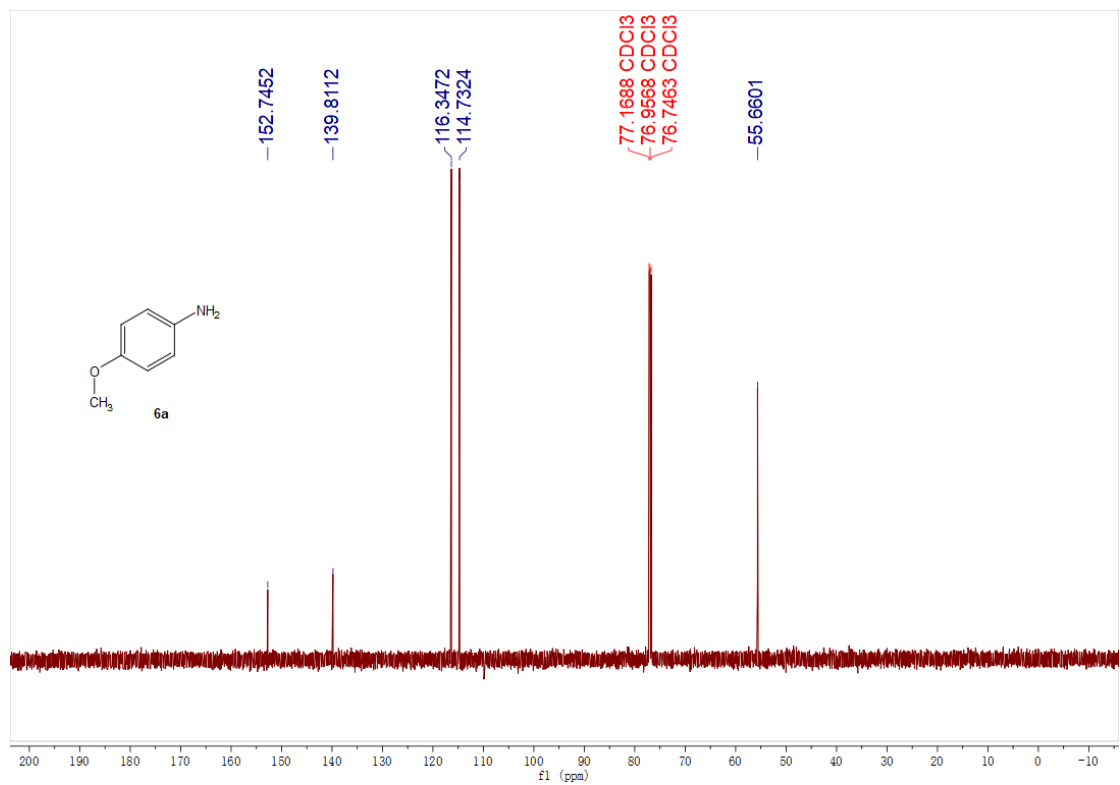



<sup>1</sup>H NMR Spectrum of **6b** (600 MHz, CDCl<sub>3</sub>)

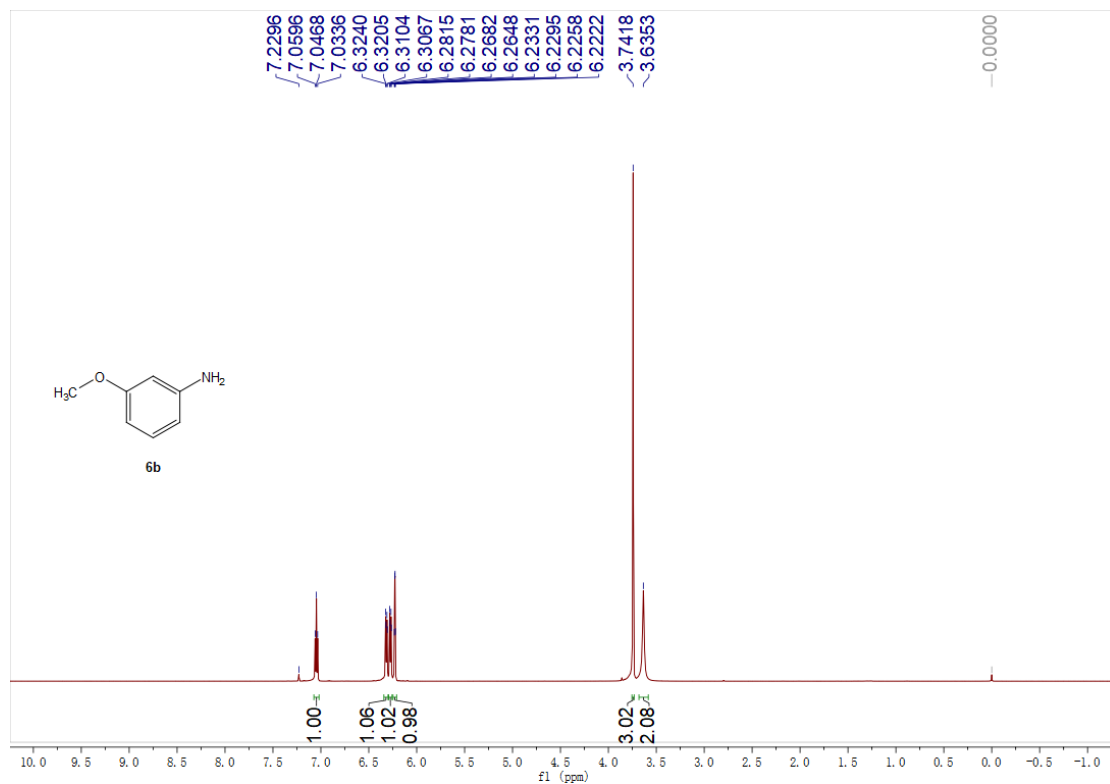

<sup>13</sup>C NMR Spectrum of **6b** (151 MHz, CDCl<sub>3</sub>)

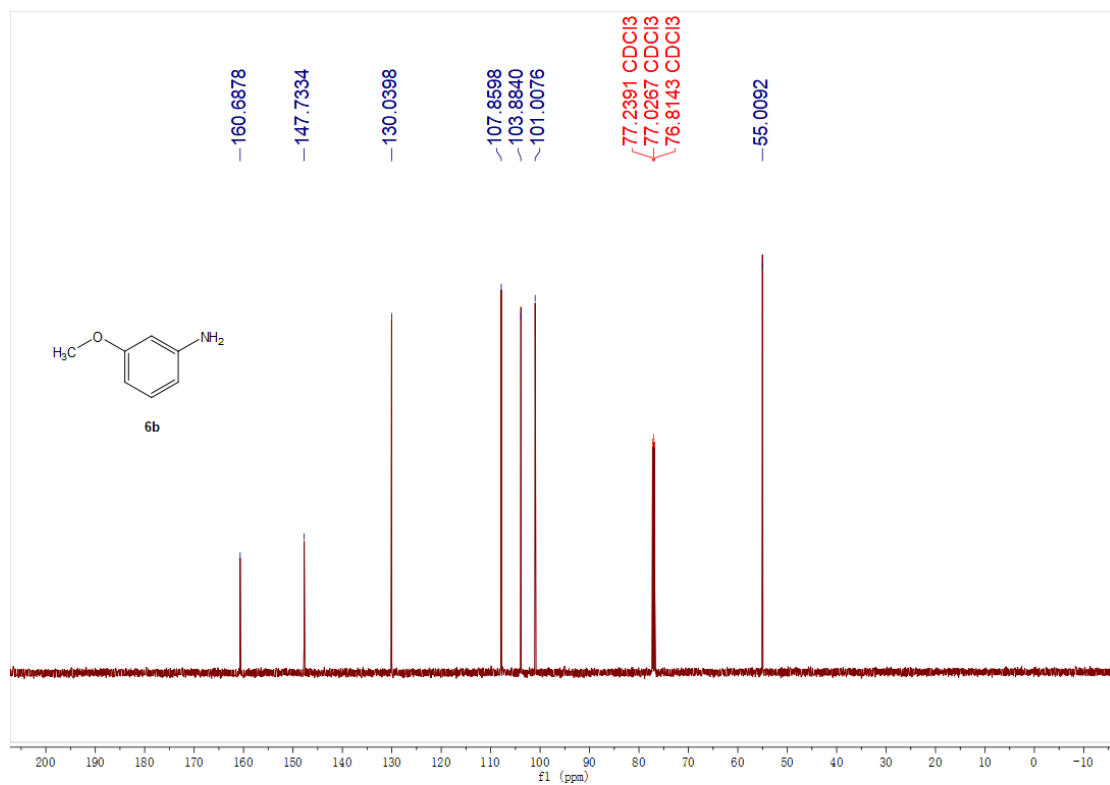

<sup>1</sup>H NMR Spectrum of **6c** (600 MHz, CDCl<sub>3</sub>)

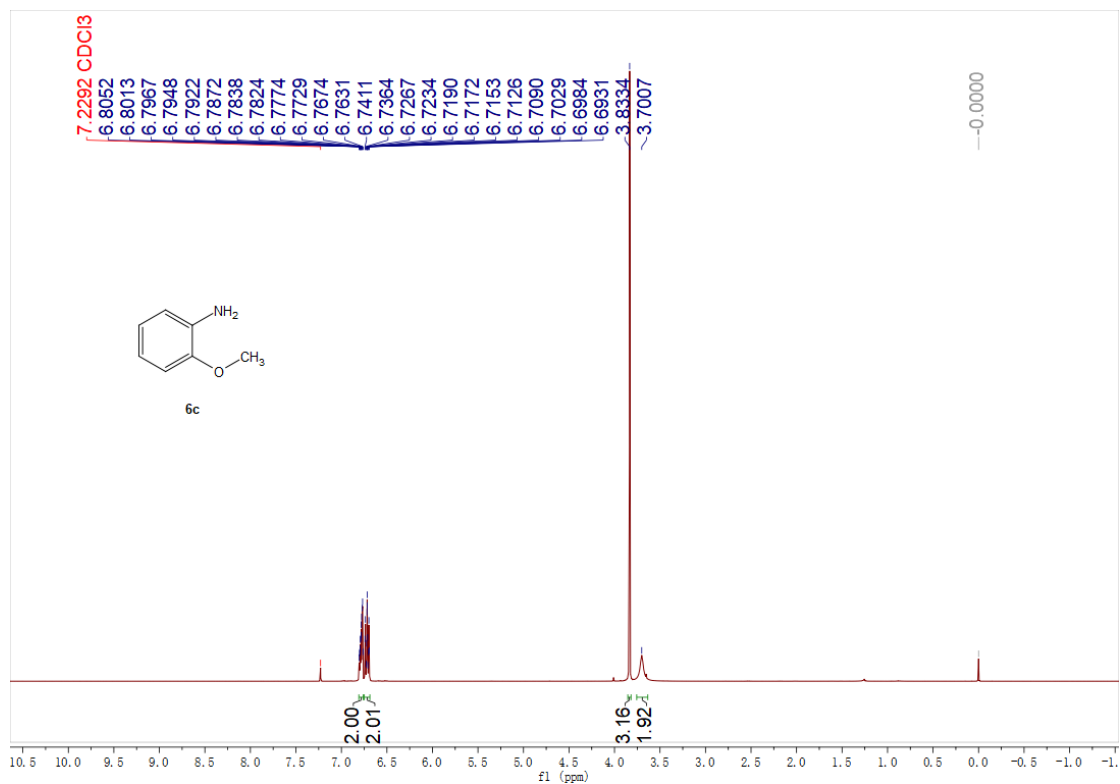

<sup>13</sup>C NMR Spectrum of **6c** (151 MHz, CDCl<sub>3</sub>)

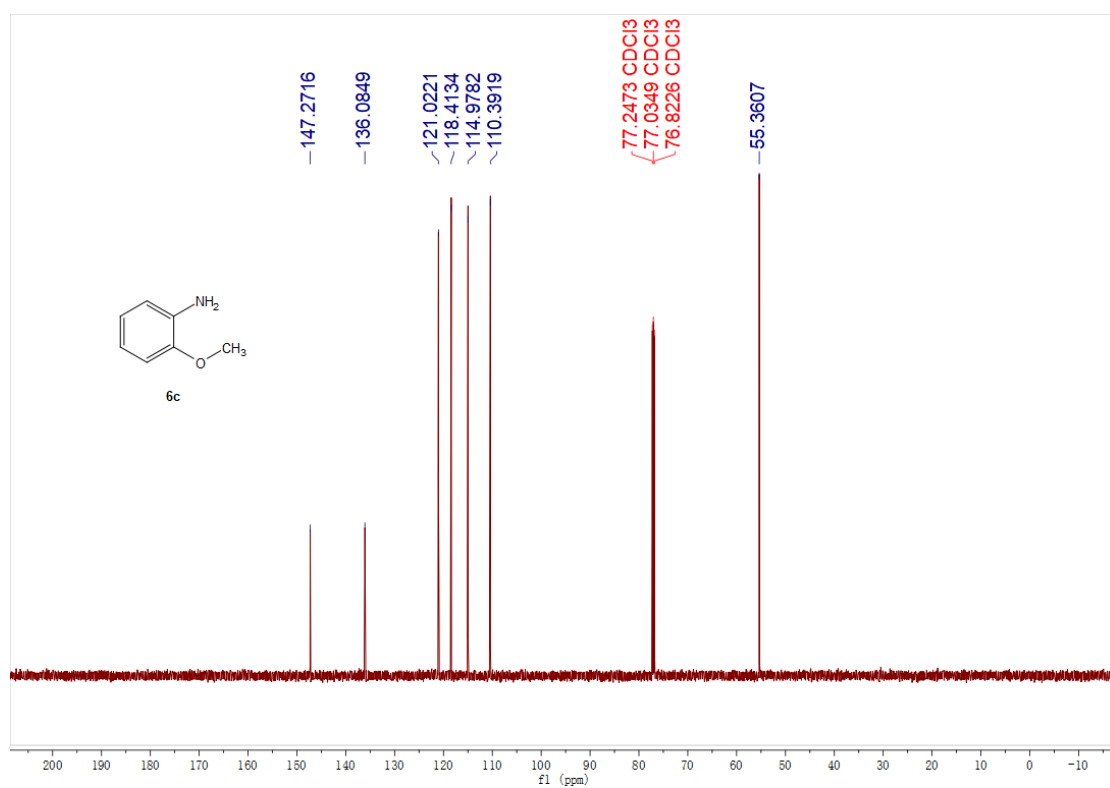

<sup>1</sup>H NMR Spectrum of **6d** (400 MHz, CDCl<sub>3</sub>)

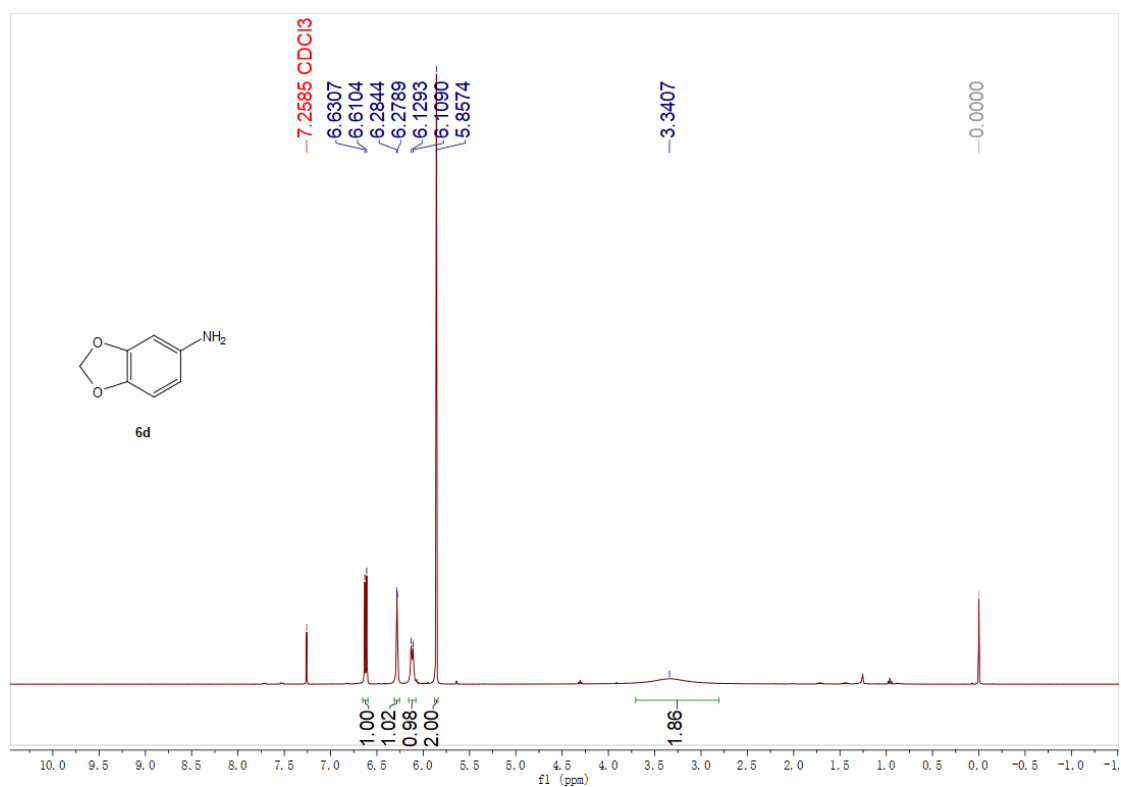

<sup>13</sup>C NMR Spectrum of **6d** (151 MHz, CDCl<sub>3</sub>)

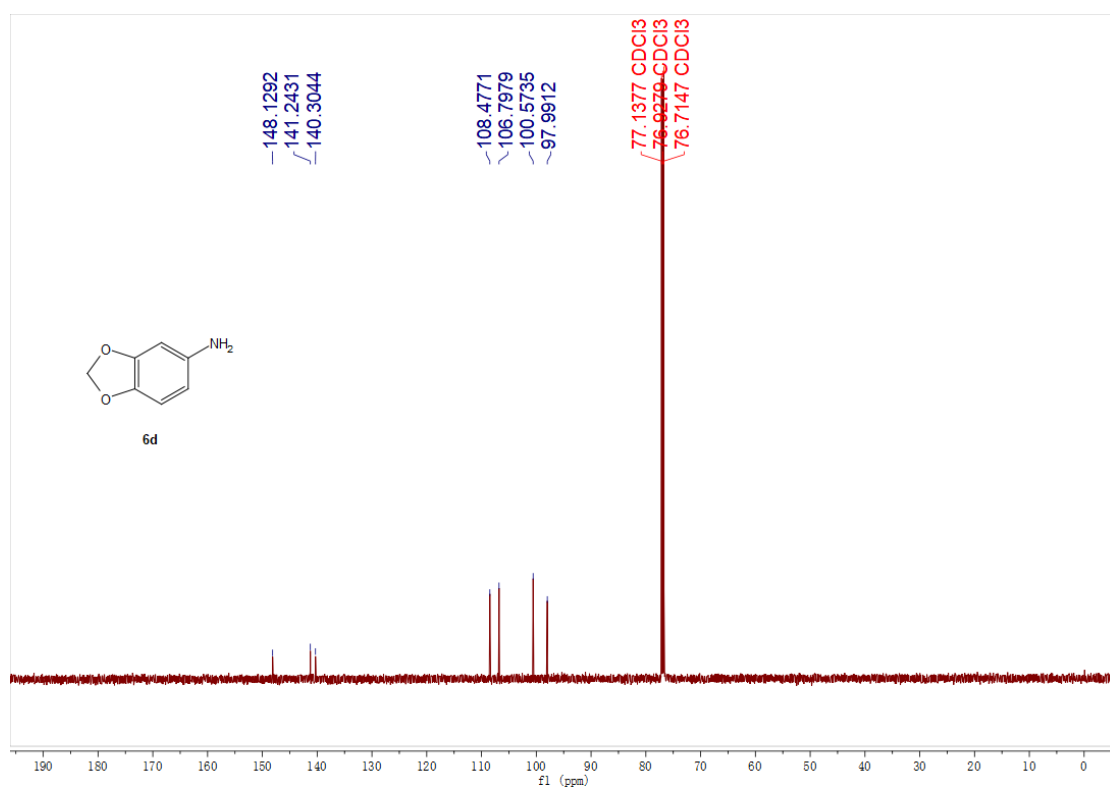

<sup>1</sup>H NMR Spectrum of **6e** (600 MHz, CDCl<sub>3</sub>)

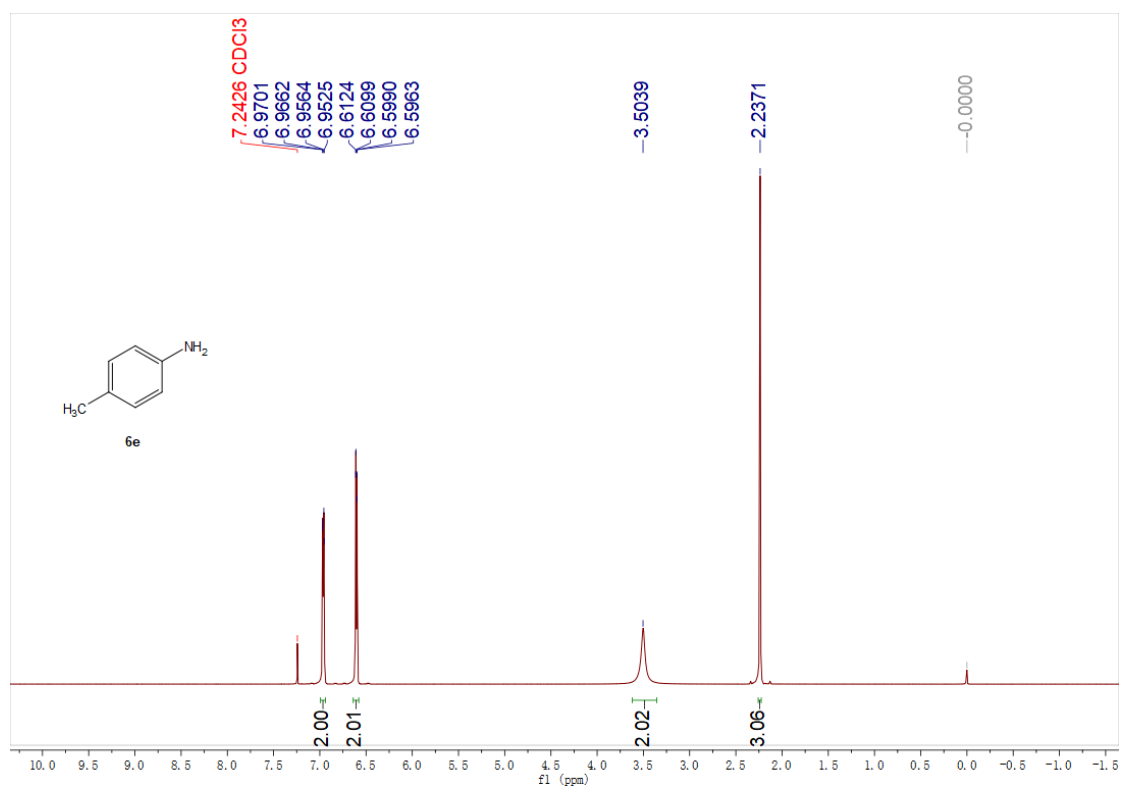

<sup>13</sup>C NMR Spectrum of **6e** (151 MHz, CDCl<sub>3</sub>)

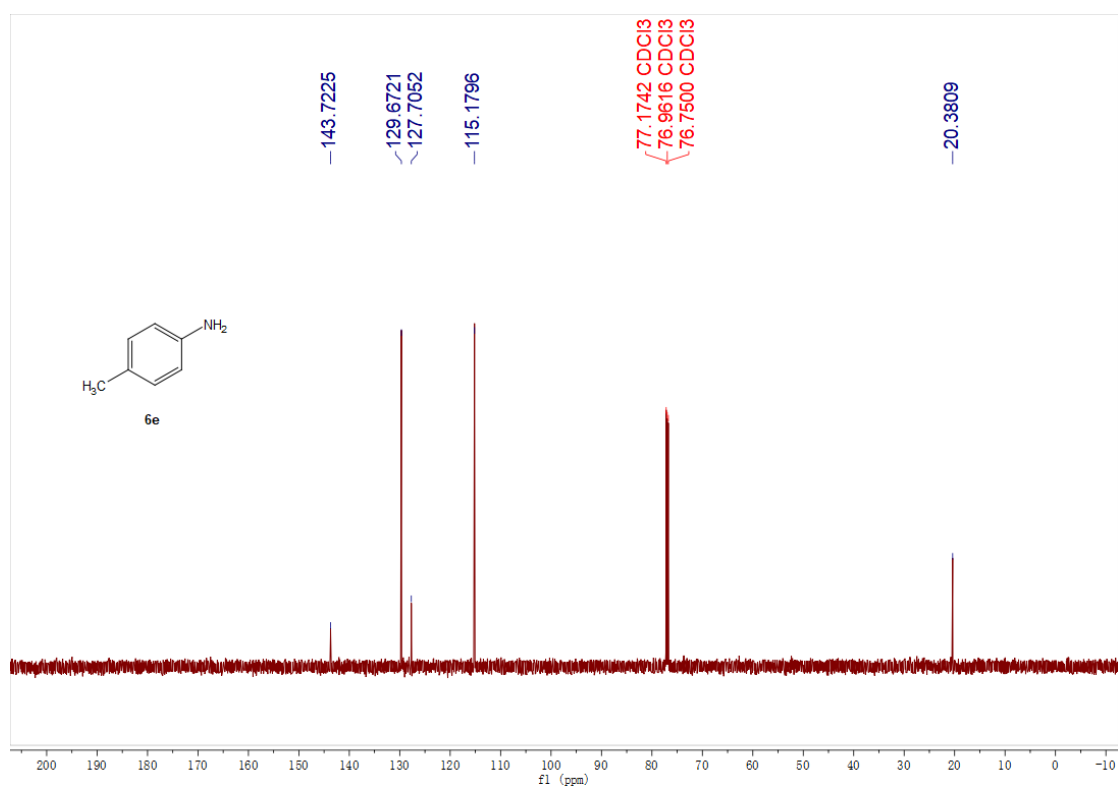

<sup>1</sup>H NMR Spectrum of **6f** (400 MHz, CDCl<sub>3</sub>)

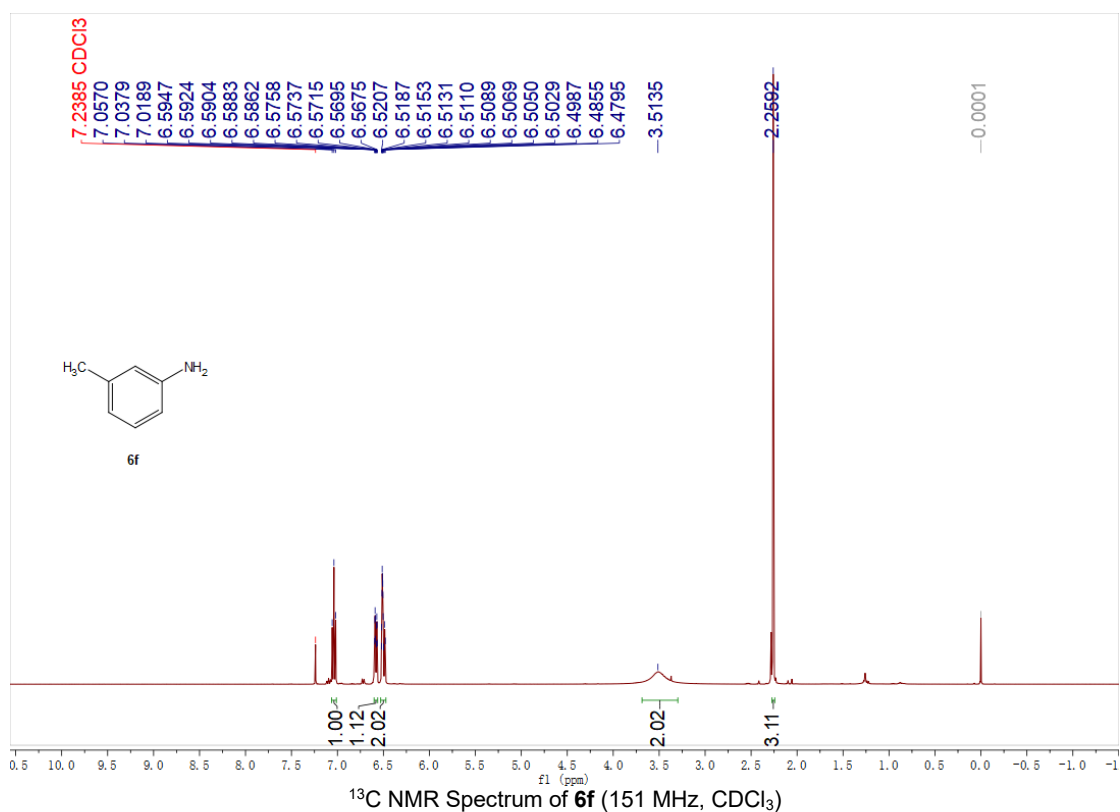

<sup>13</sup>C NMR Spectrum of **6f** (151 MHz, CDCl<sub>3</sub>)

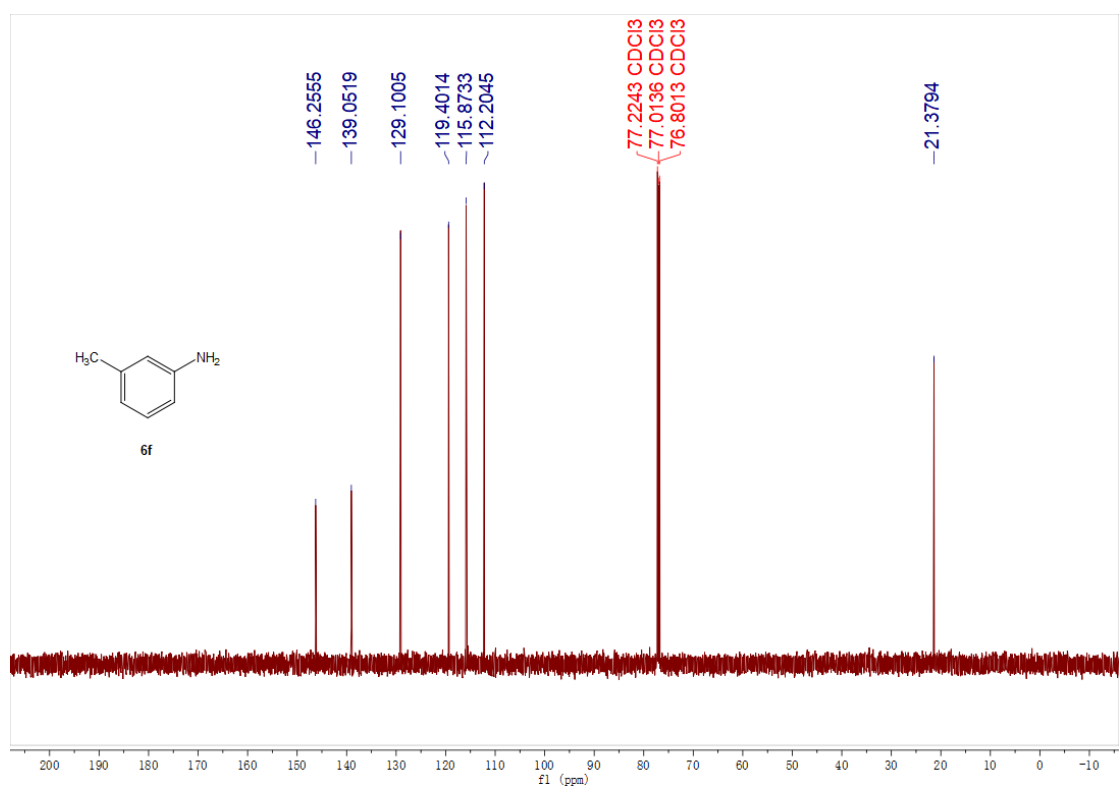

<sup>1</sup>H NMR Spectrum of **6g** (600 MHz, CDCl<sub>3</sub>)

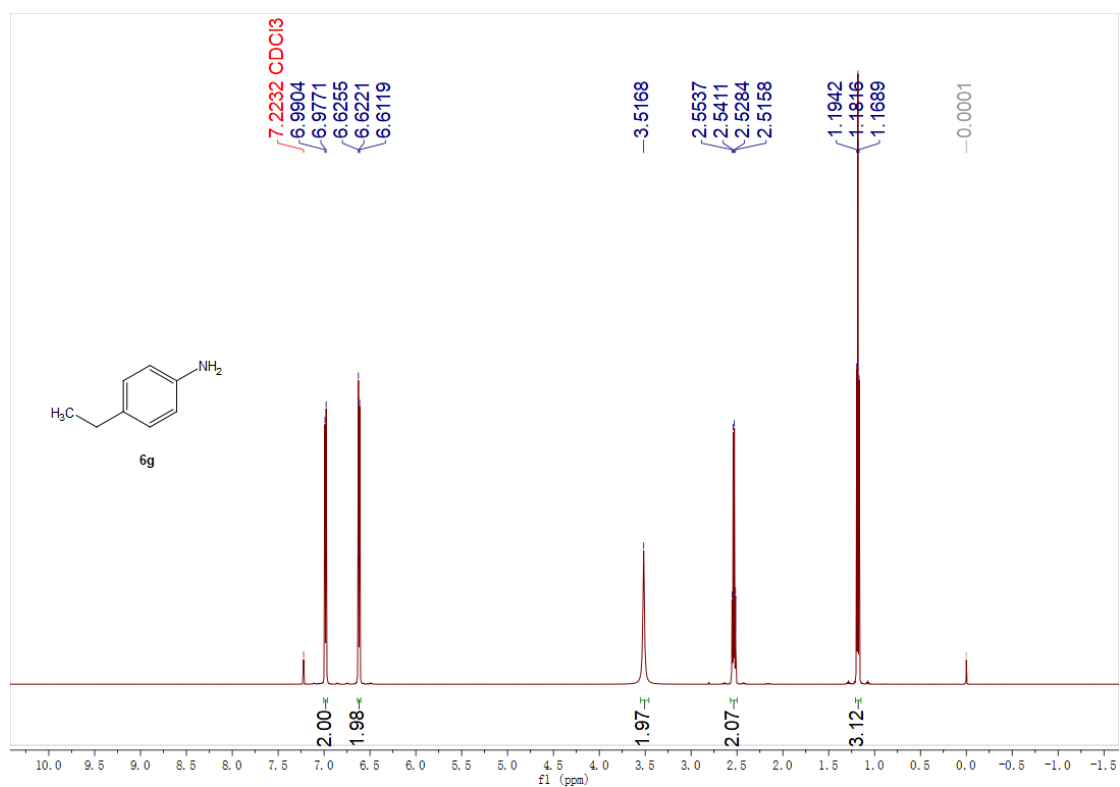

<sup>13</sup>C NMR Spectrum of **6g** (151 MHz, CDCl<sub>3</sub>)

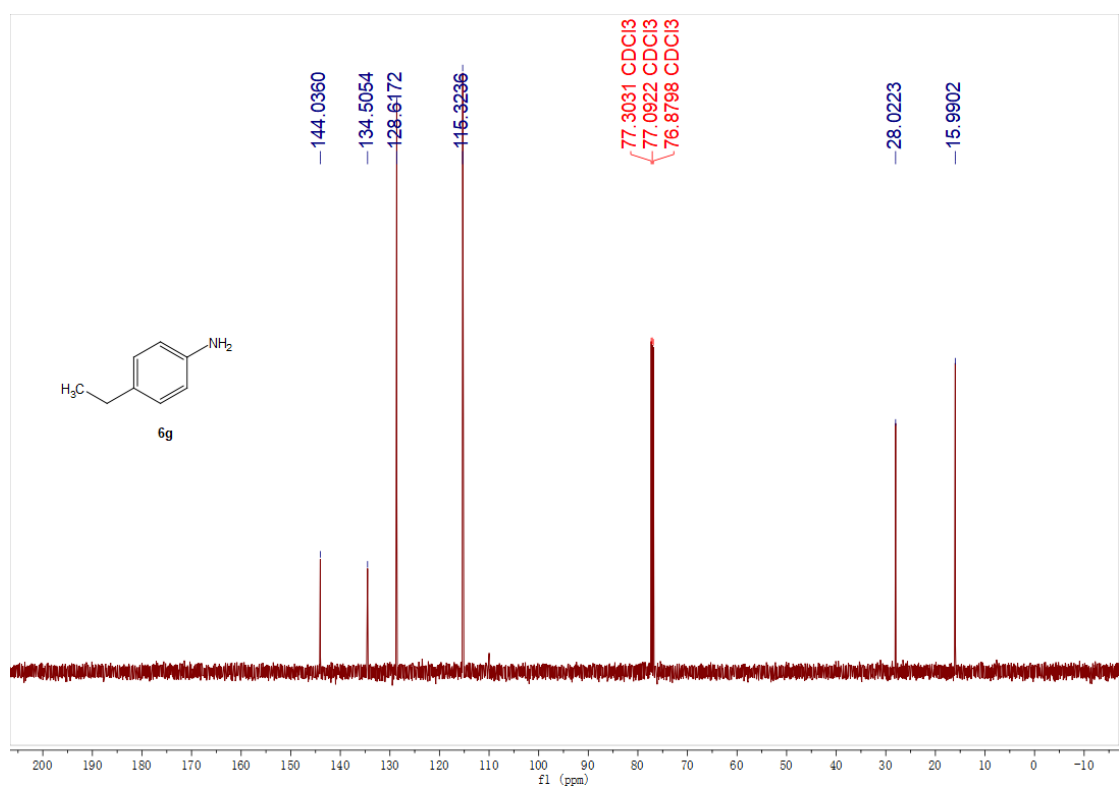

<sup>1</sup>H NMR Spectrum of **6h** (600 MHz, CDCl<sub>3</sub>)

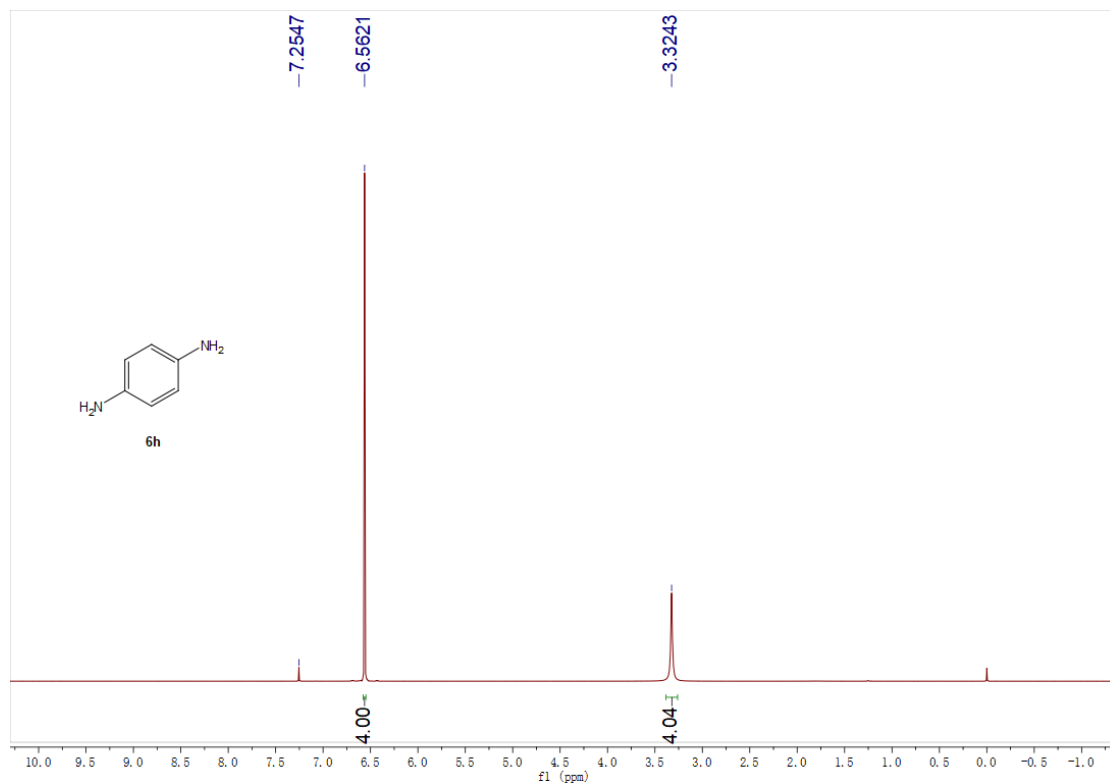

<sup>13</sup>C NMR Spectrum of **6h** (151 MHz, CDCl<sub>3</sub>)

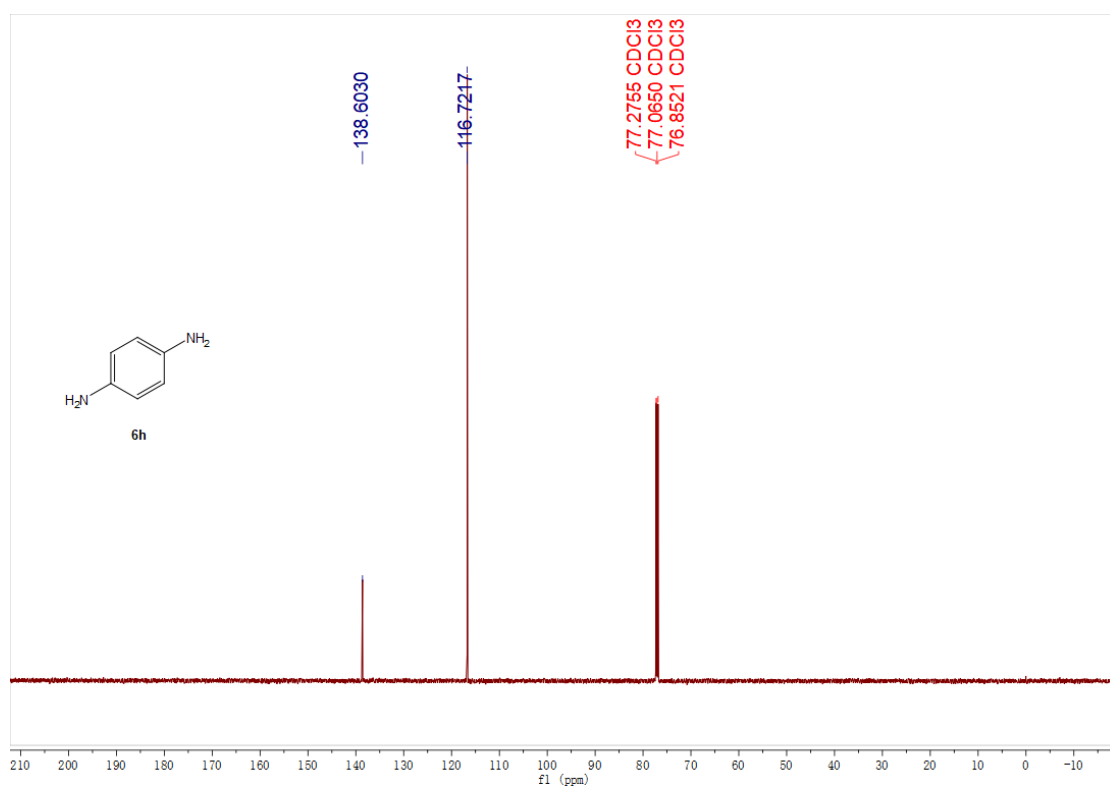

<sup>1</sup>H NMR Spectrum of **6i** (600 MHz, CDCl<sub>3</sub>)

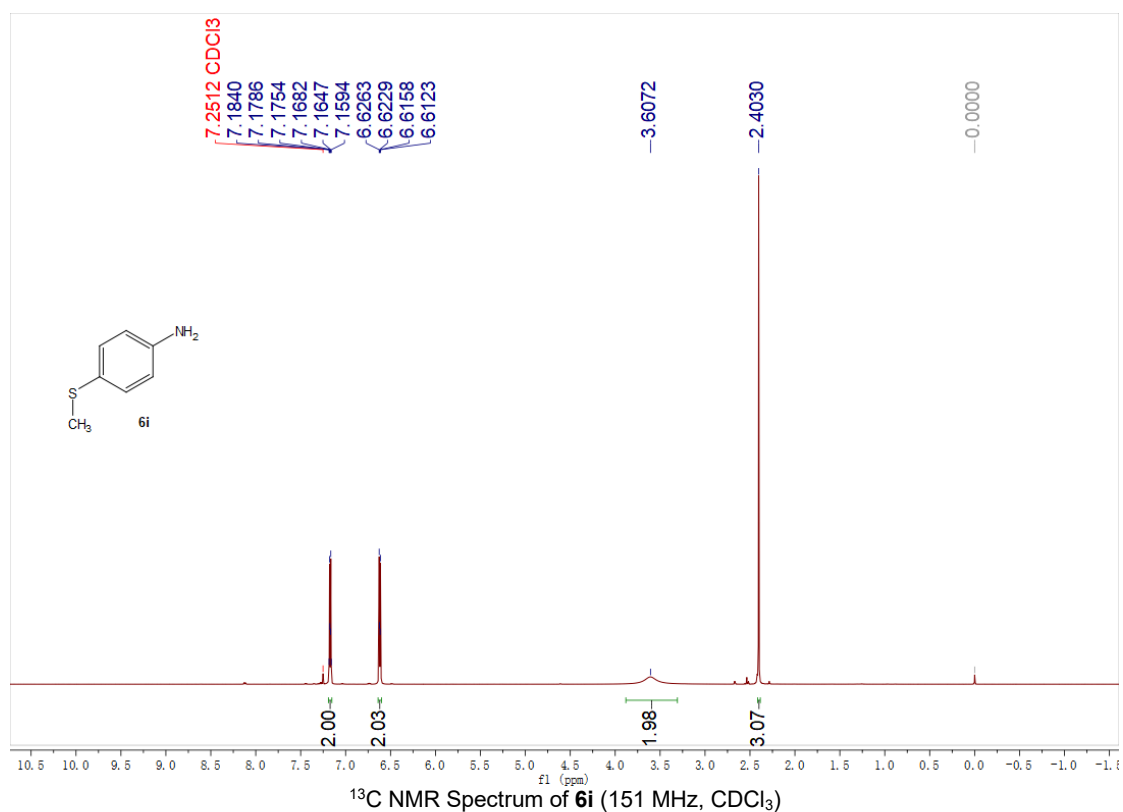

<sup>13</sup>C NMR Spectrum of **6i** (151 MHz, CDCl<sub>3</sub>)

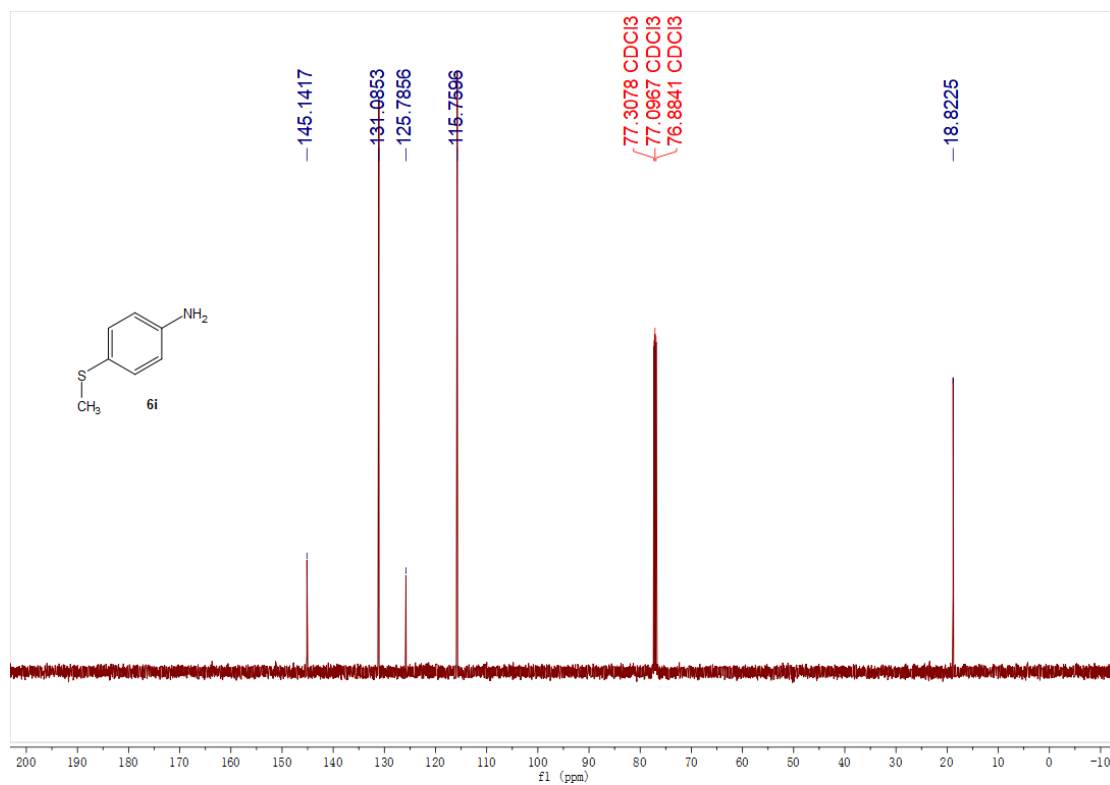



<sup>1</sup>H NMR Spectrum of **6j** (600 MHz, CDCl<sub>3</sub>)

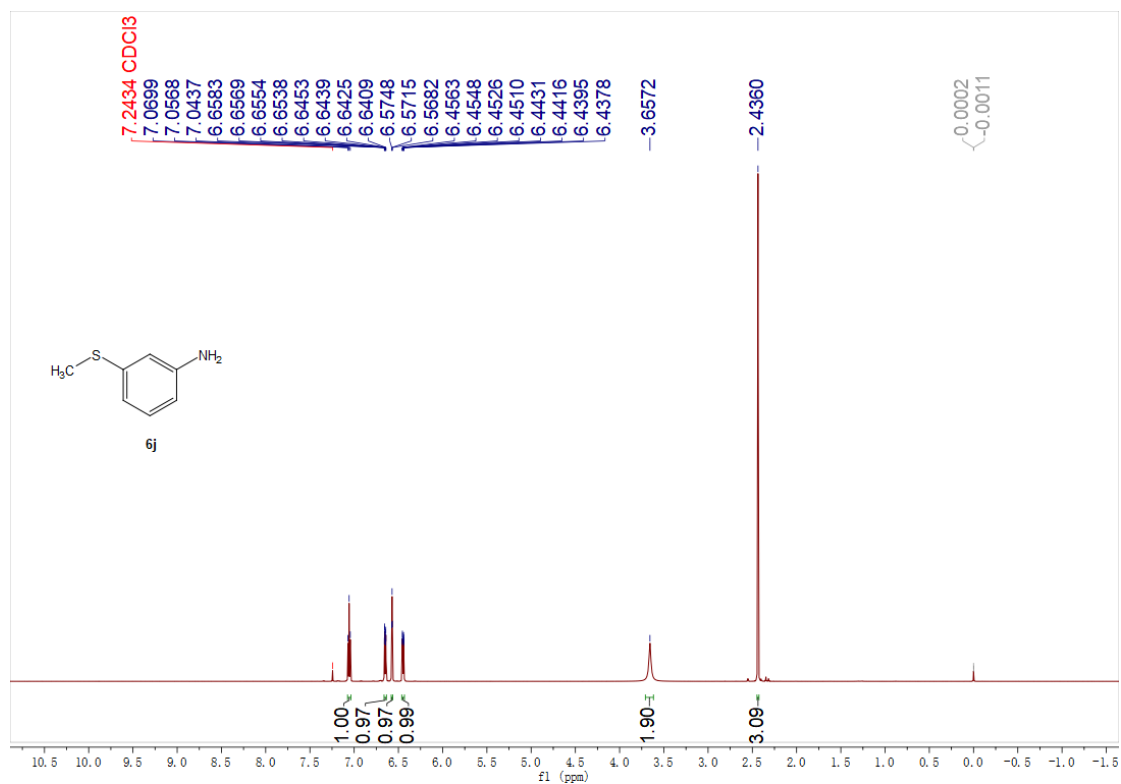

<sup>13</sup>C NMR Spectrum of **6j** (151 MHz, CDCl<sub>3</sub>)

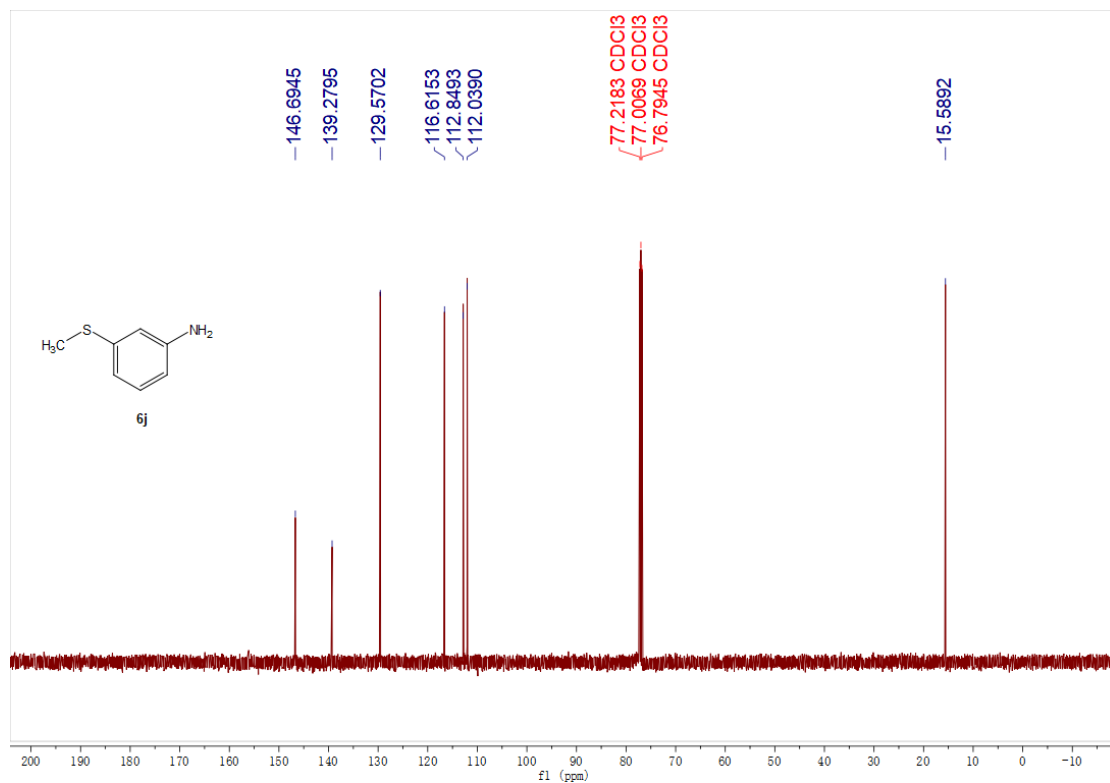

<sup>1</sup>H NMR Spectrum of **6k** (600 MHz, CDCl<sub>3</sub>)

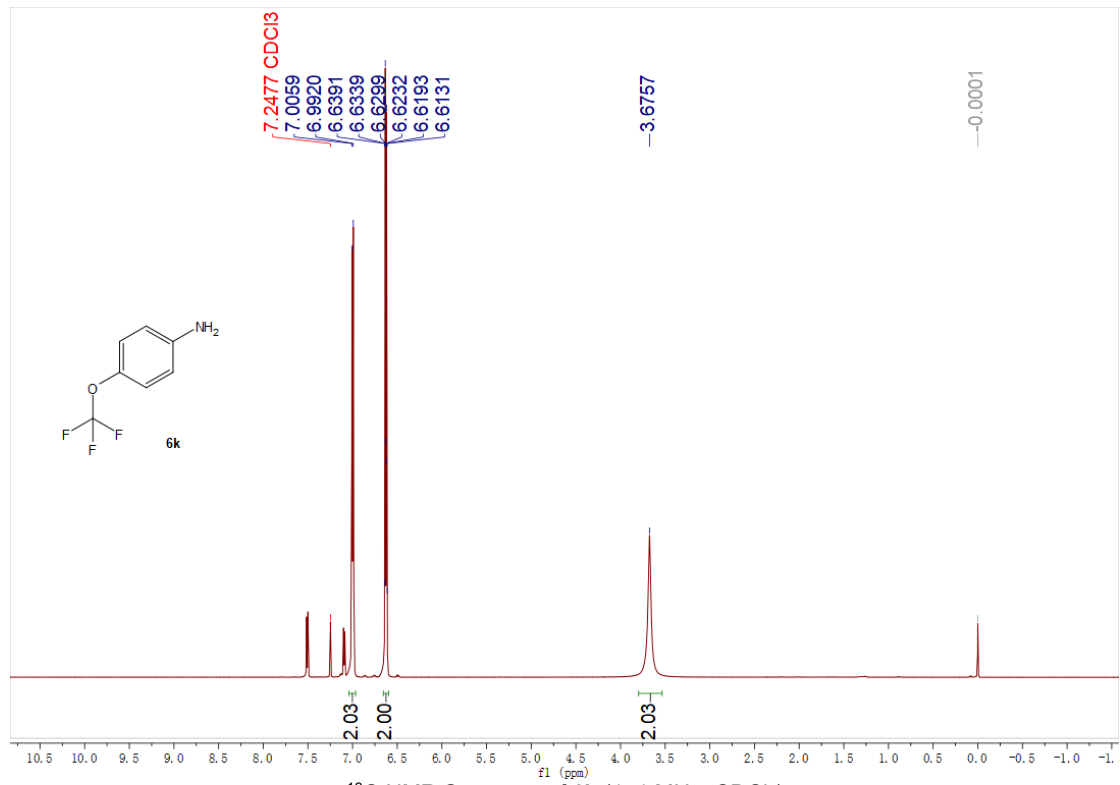

<sup>13</sup>C NMR Spectrum of **6k** (151 MHz, CDCl<sub>3</sub>)

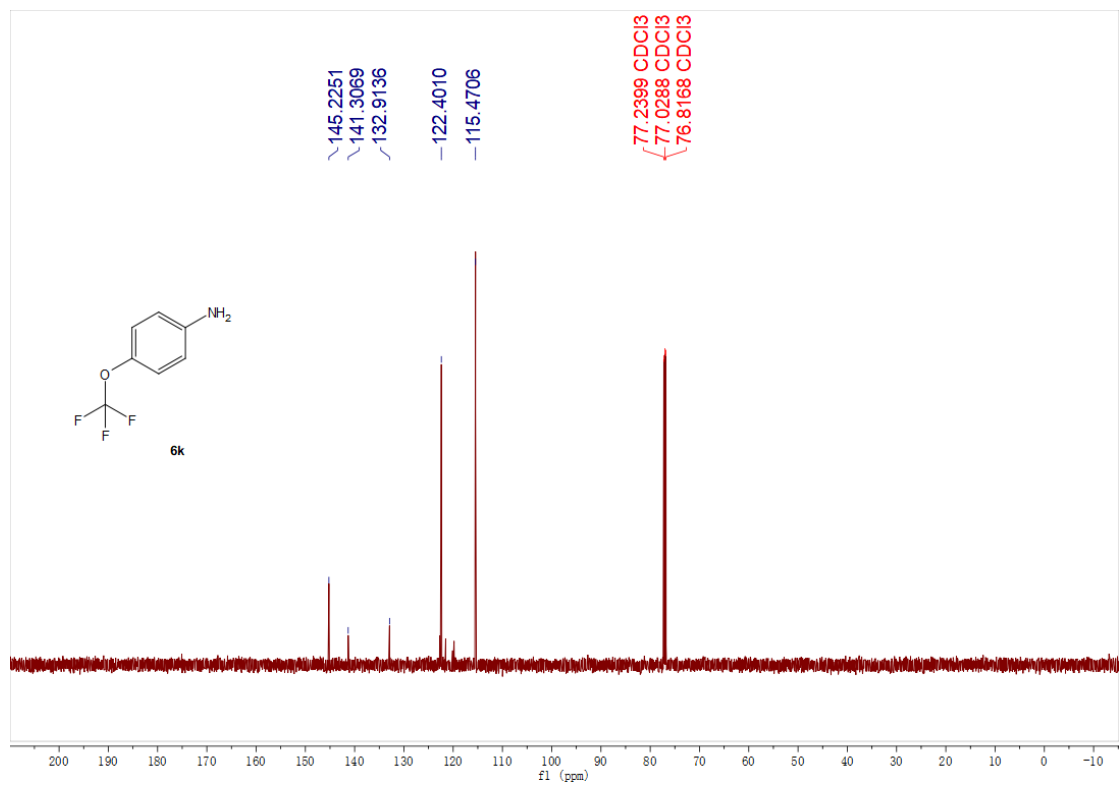

<sup>1</sup>H NMR Spectrum of **6I** (600 MHz, CDCl<sub>3</sub>)

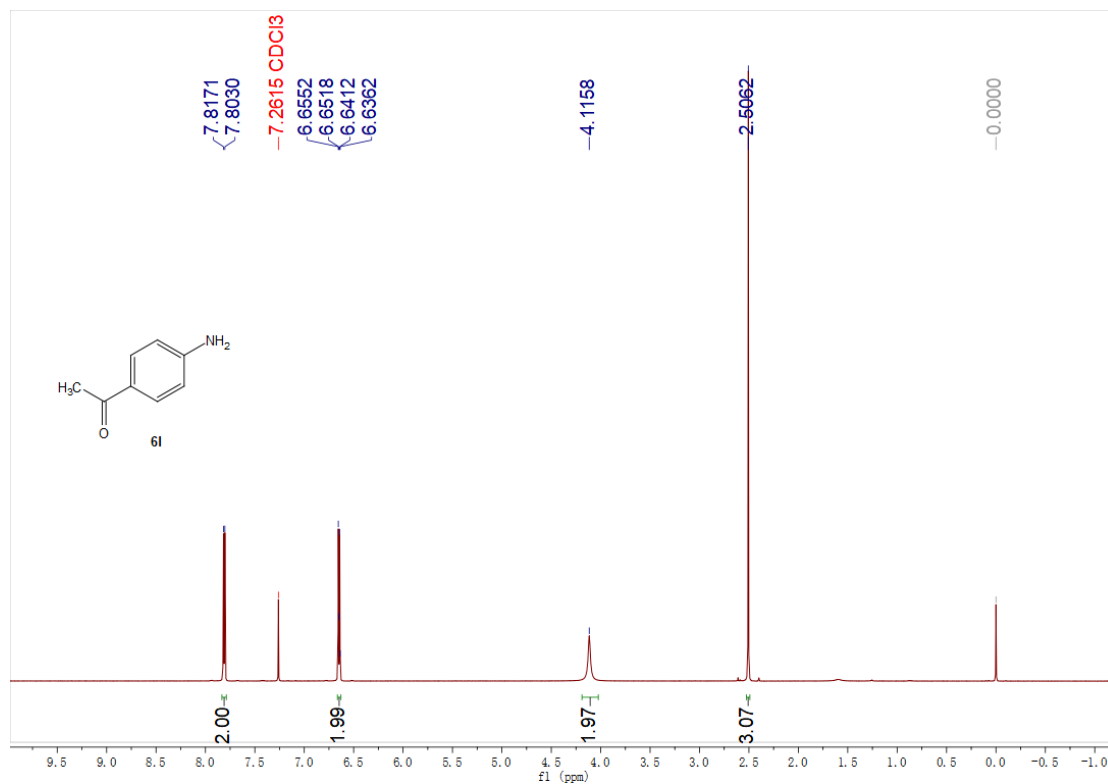

<sup>13</sup>C NMR Spectrum of **6I** (151 MHz, CDCl<sub>3</sub>)

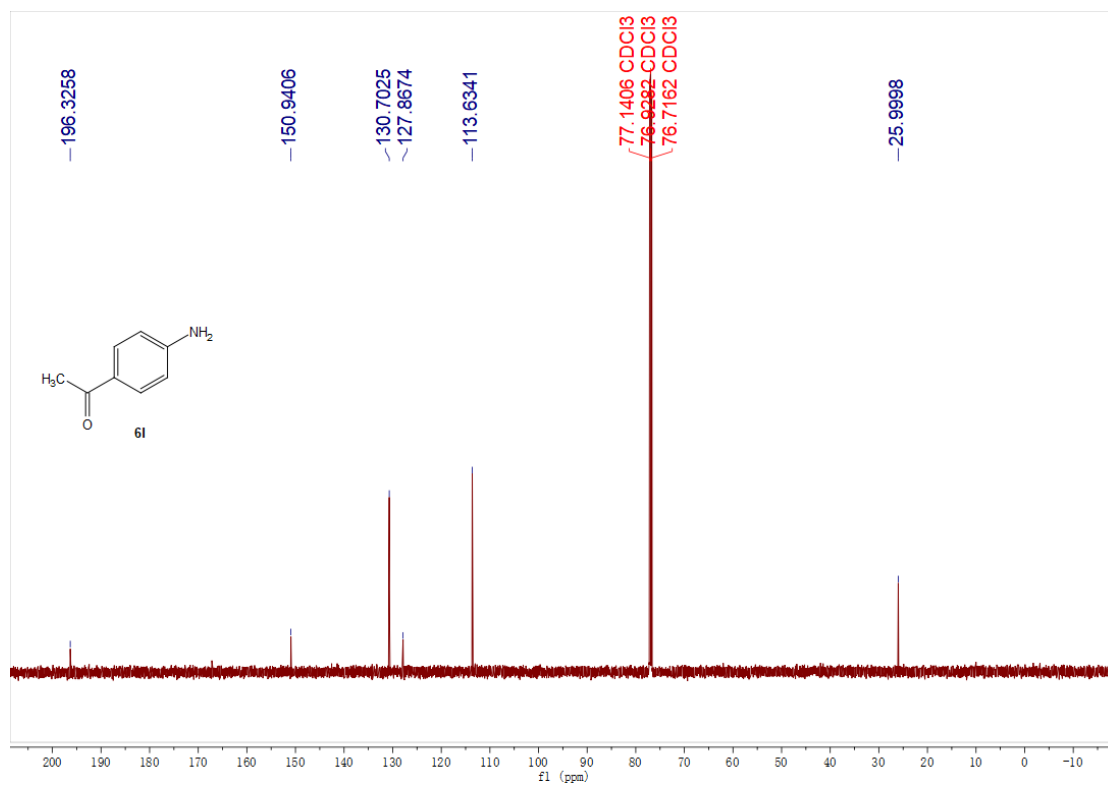

<sup>1</sup>H NMR Spectrum of **6m** (600 MHz, CDCl<sub>3</sub>)

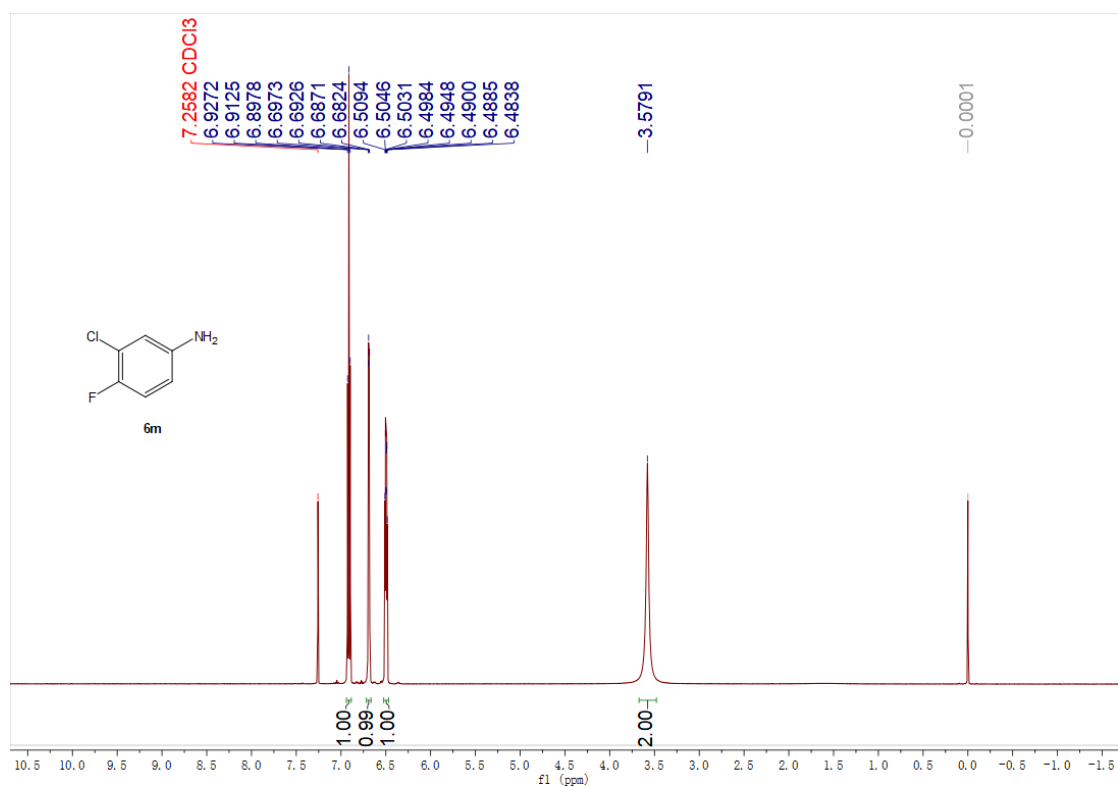

<sup>13</sup>C NMR Spectrum of **6m** (151 MHz, CDCl<sub>3</sub>)

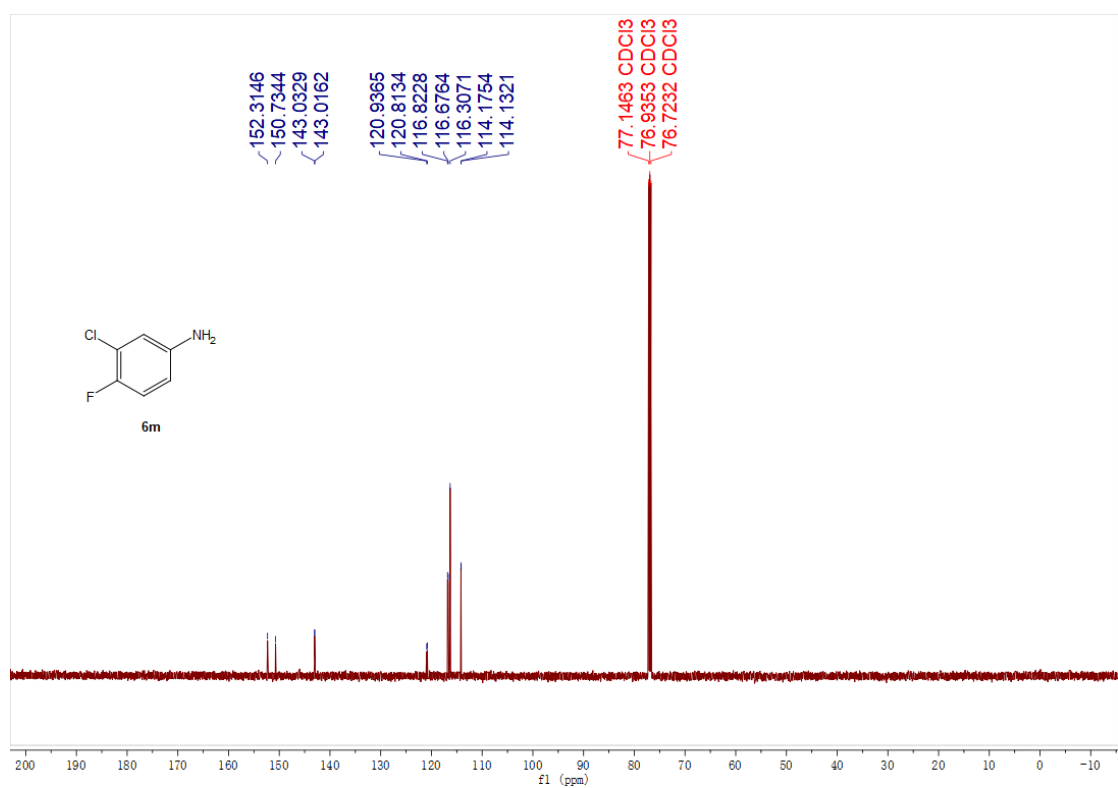

<sup>1</sup>H NMR Spectrum of **6n** (600 MHz, CDCl<sub>3</sub>)

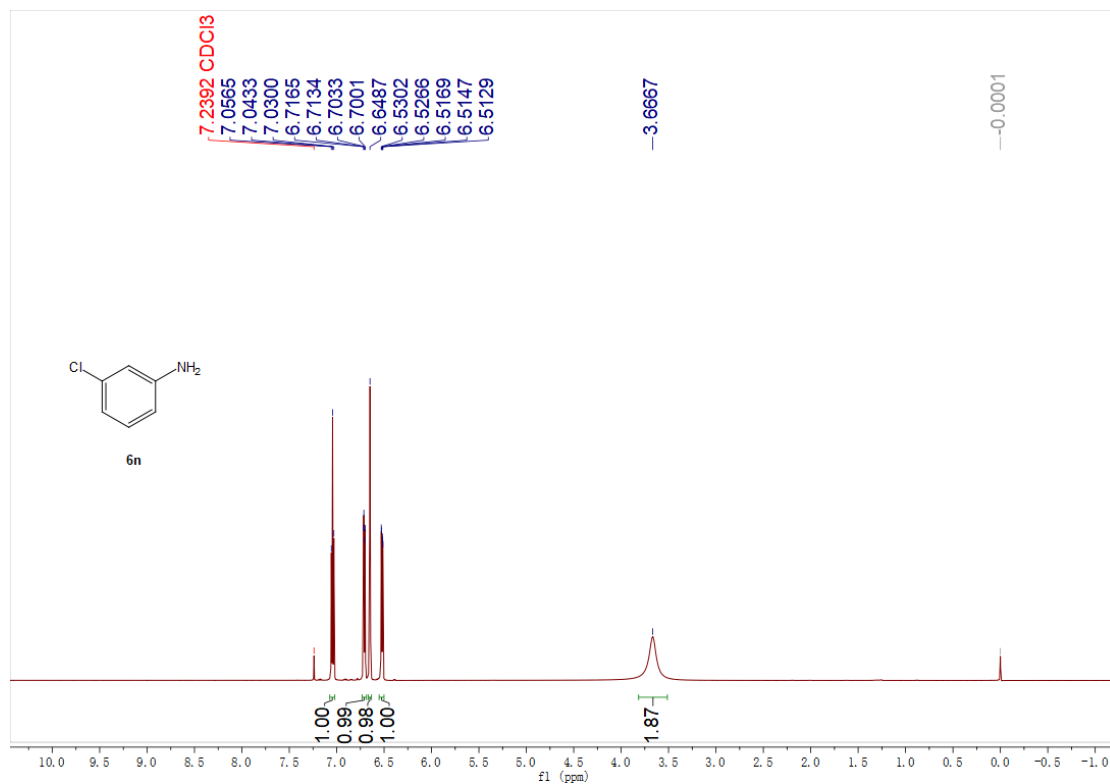

<sup>13</sup>C NMR Spectrum of **6n** (151 MHz, CDCl<sub>3</sub>)

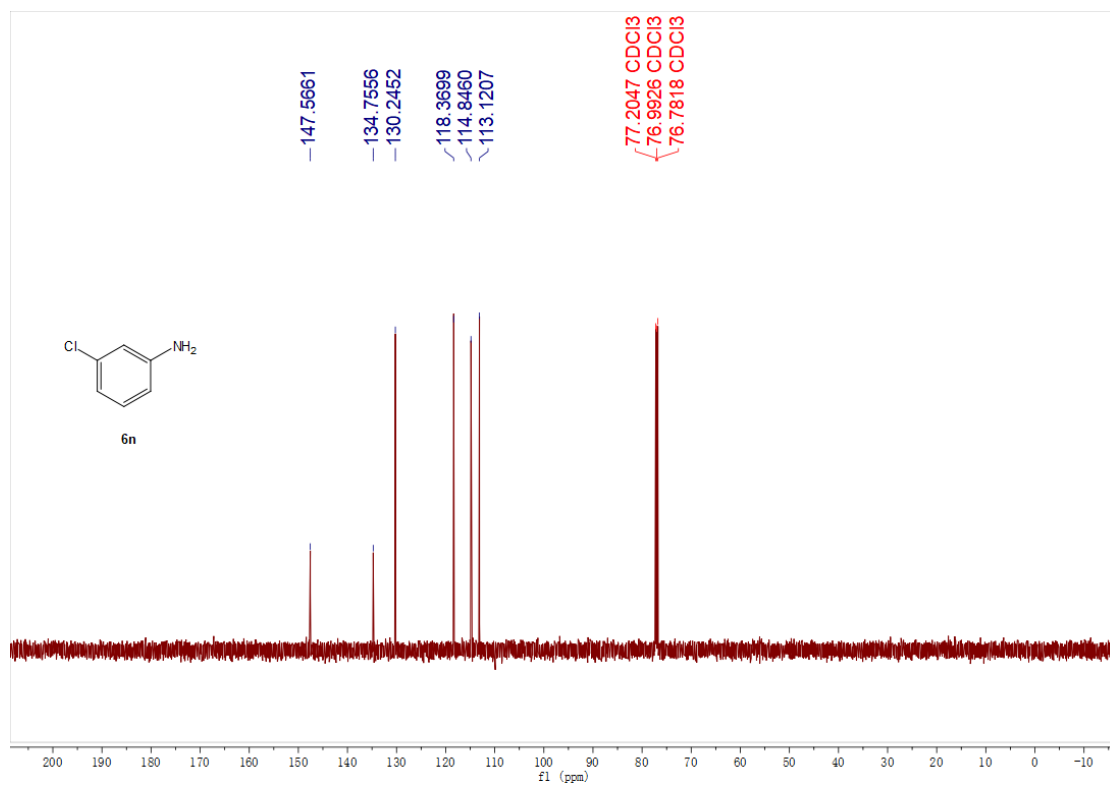

<sup>1</sup>H NMR Spectrum of **6o** (400 MHz, DMSO-*d*<sub>6</sub>)

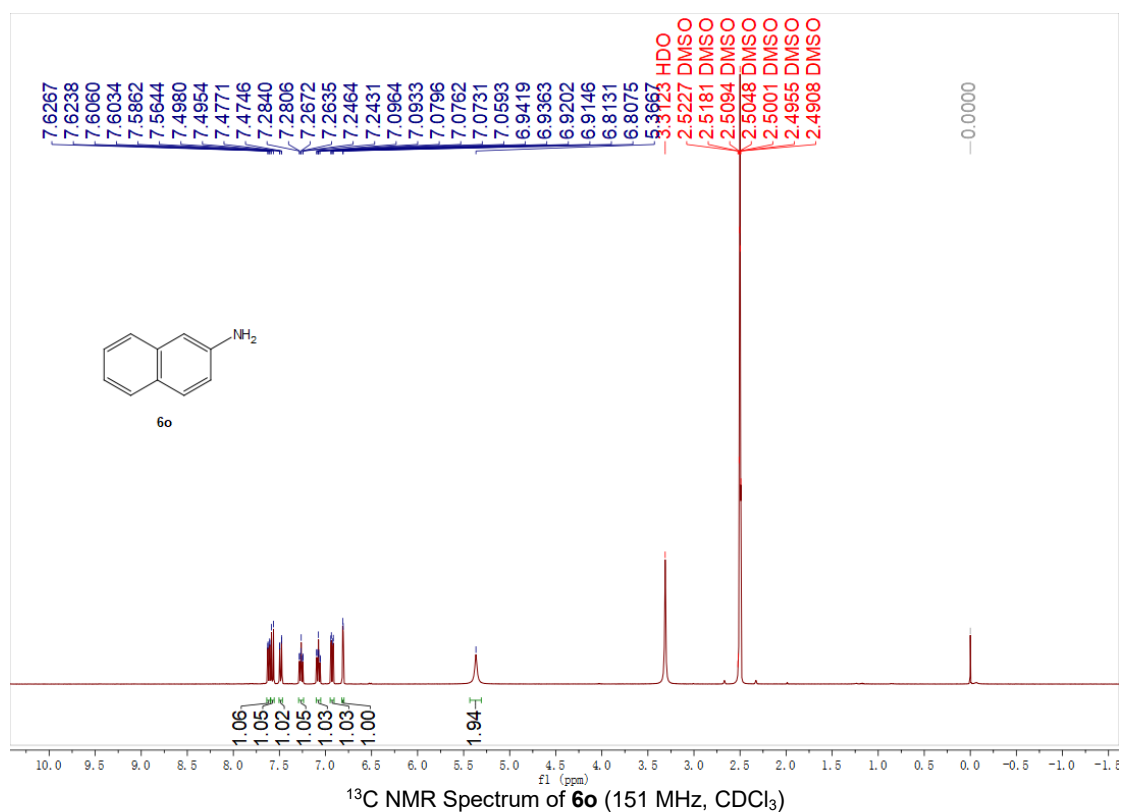

<sup>13</sup>C NMR Spectrum of **6o** (151 MHz, CDCl<sub>3</sub>)

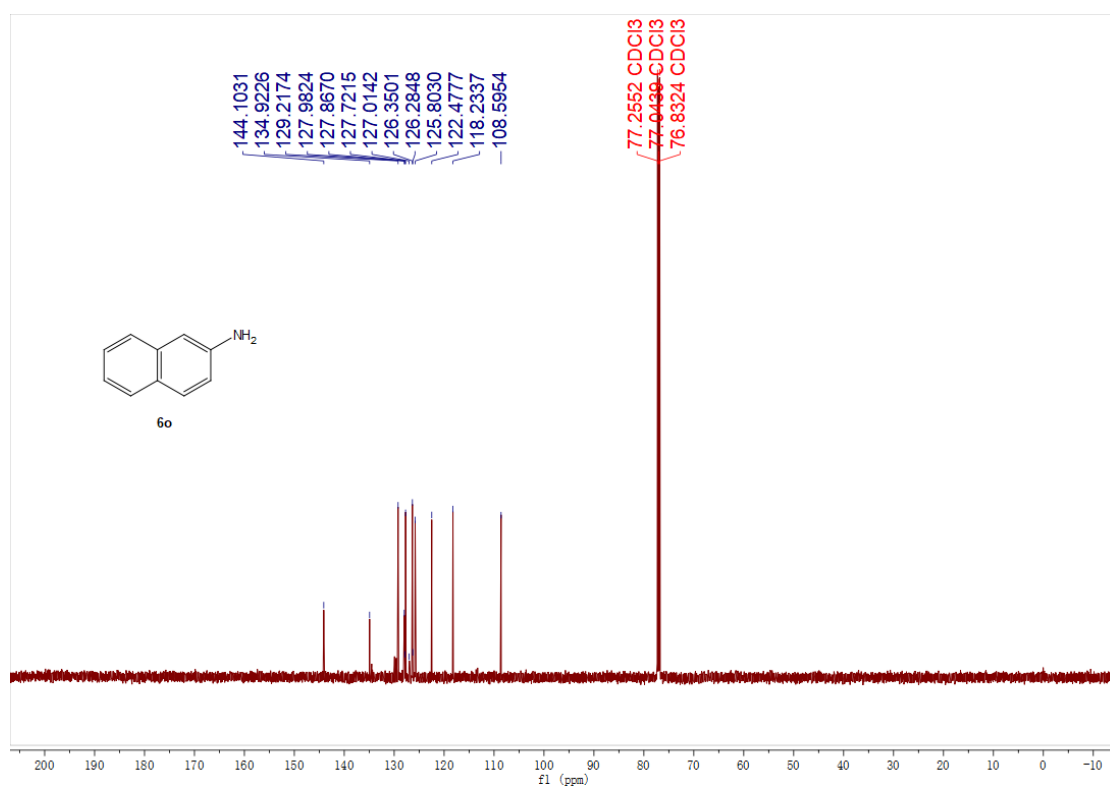

<sup>1</sup>H NMR Spectrum of **6p** (600 MHz, DMSO-*d*<sub>6</sub>)

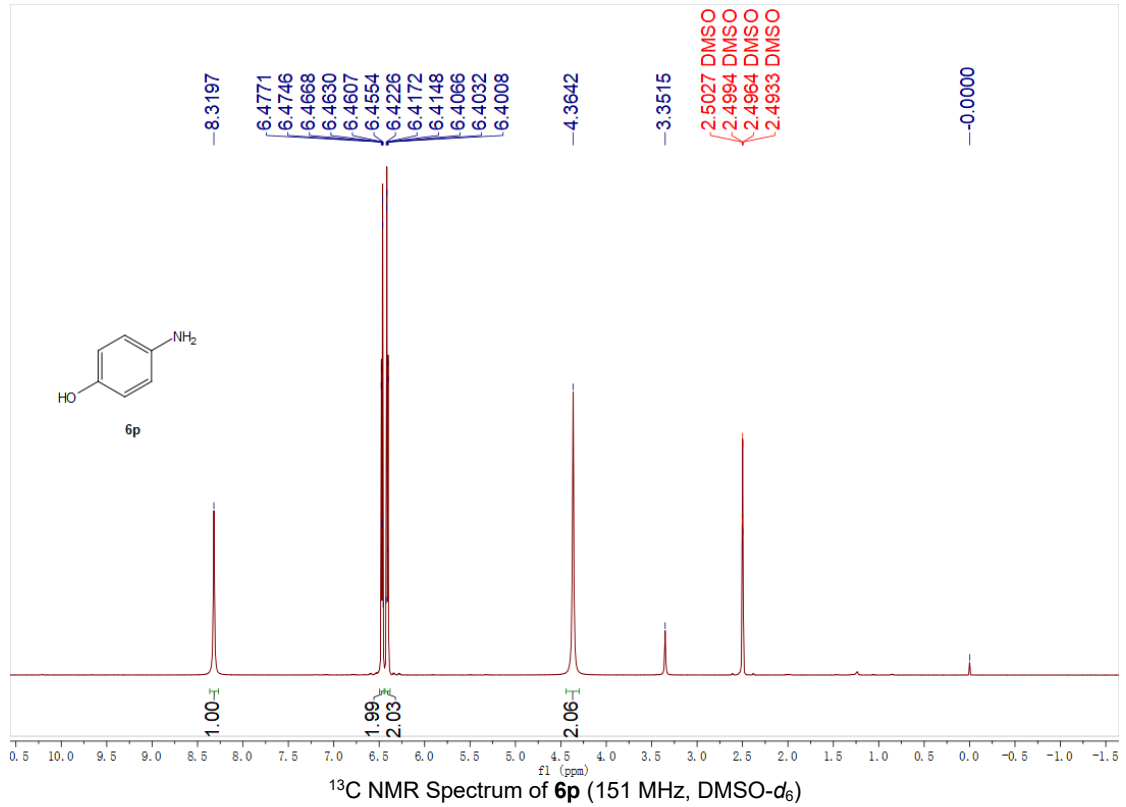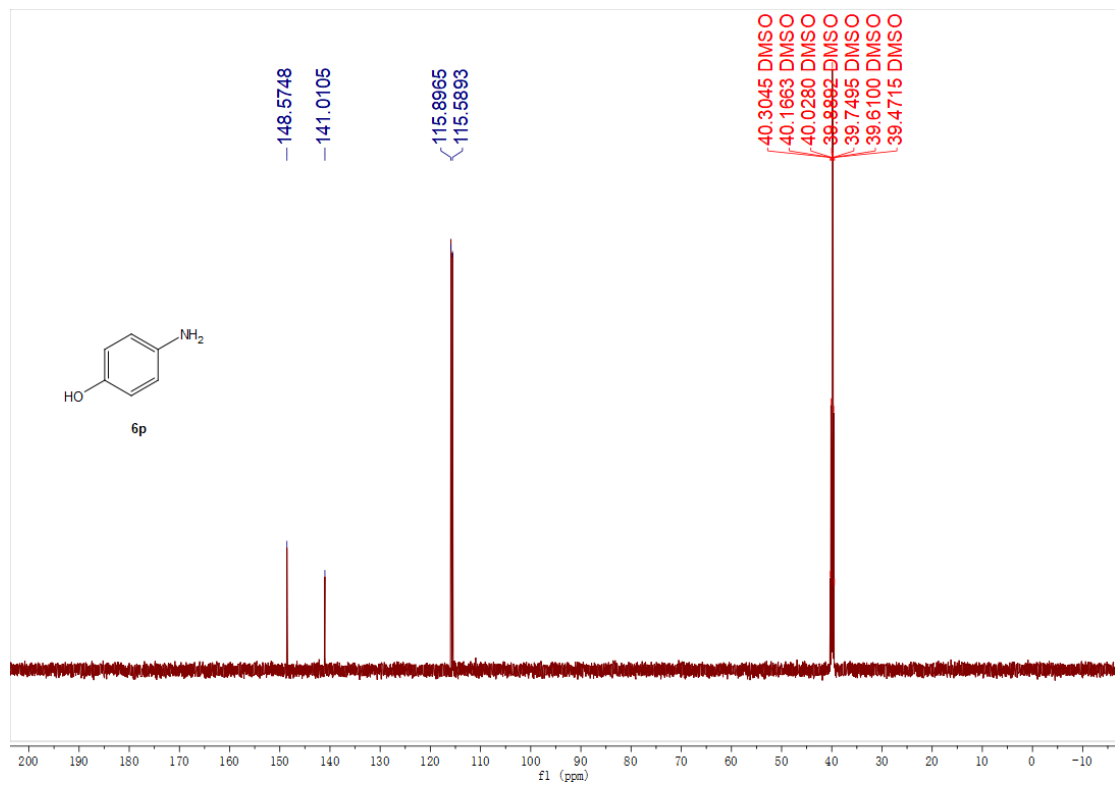

<sup>1</sup>H NMR Spectrum of **6q** (400 MHz, CDCl<sub>3</sub>)

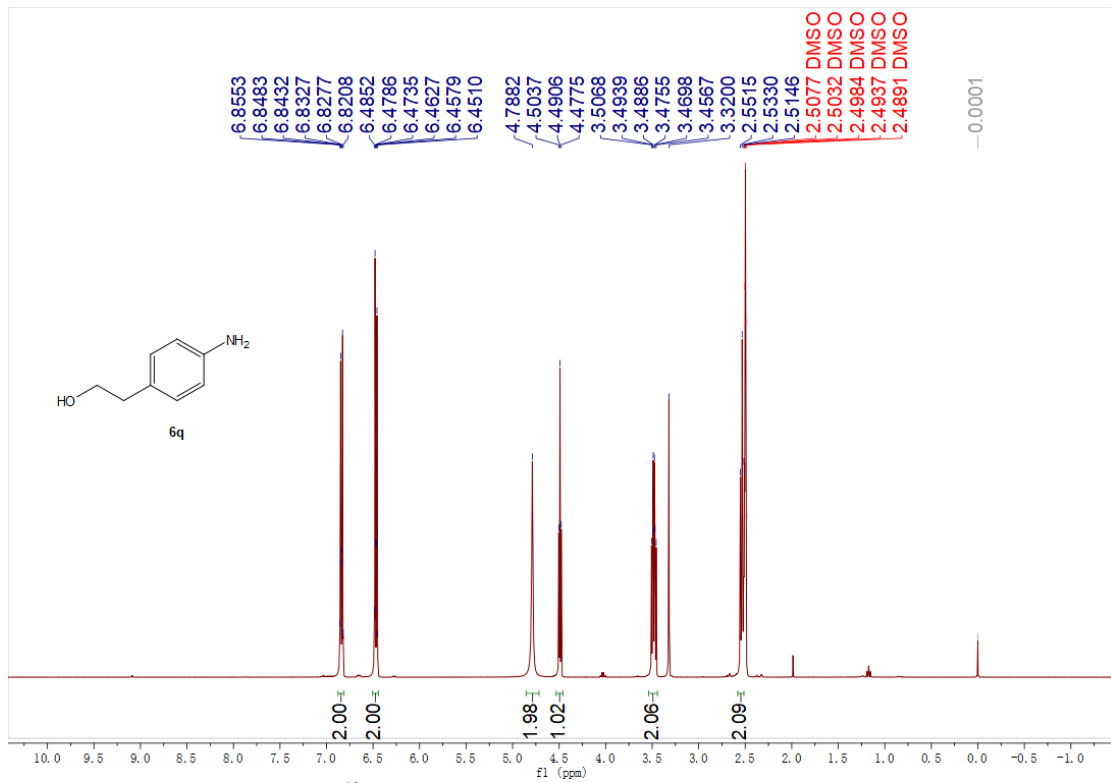

<sup>13</sup>C NMR Spectrum of **6q** (151 MHz, CDCl<sub>3</sub>)

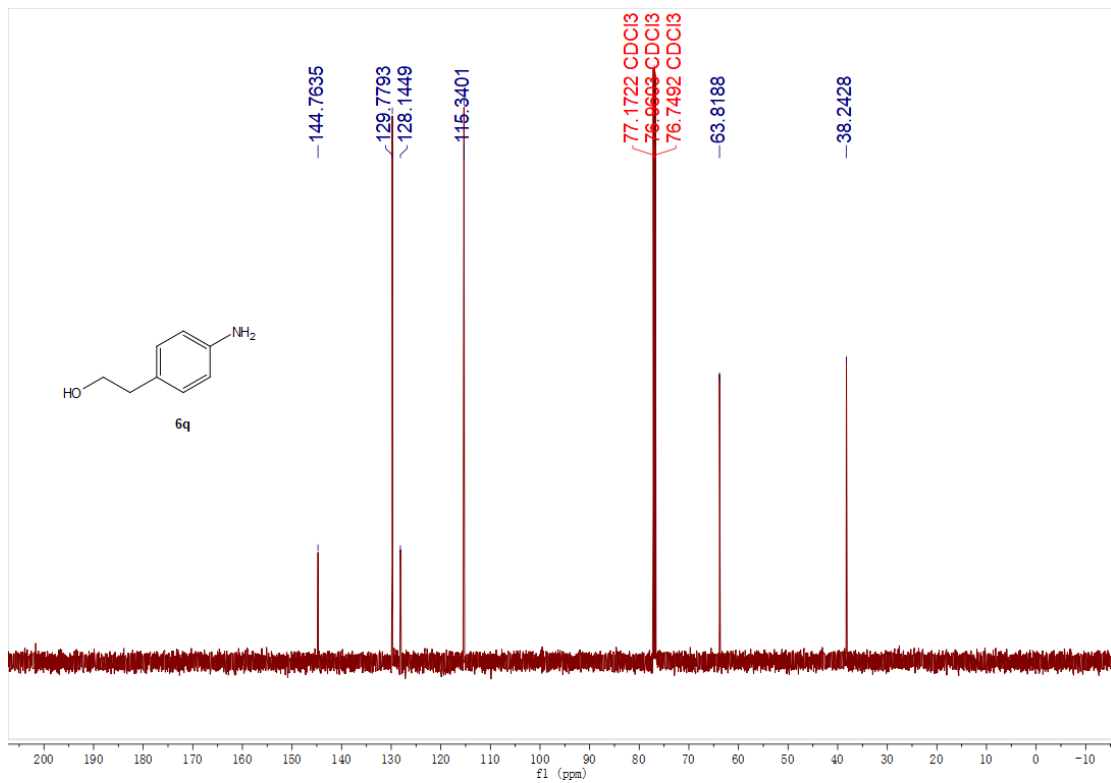



<sup>1</sup>H NMR Spectrum of **6r** (400 MHz, CDCl<sub>3</sub>)

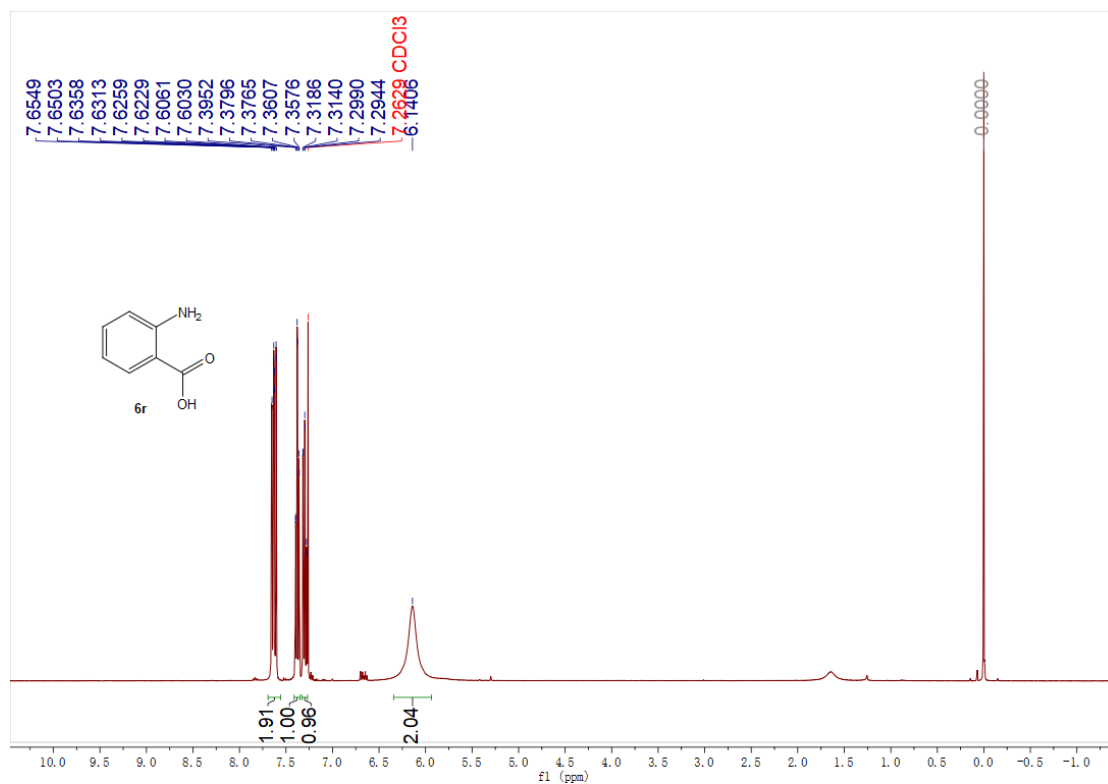

<sup>13</sup>C NMR Spectrum of **6r** (151 MHz, CDCl<sub>3</sub>)

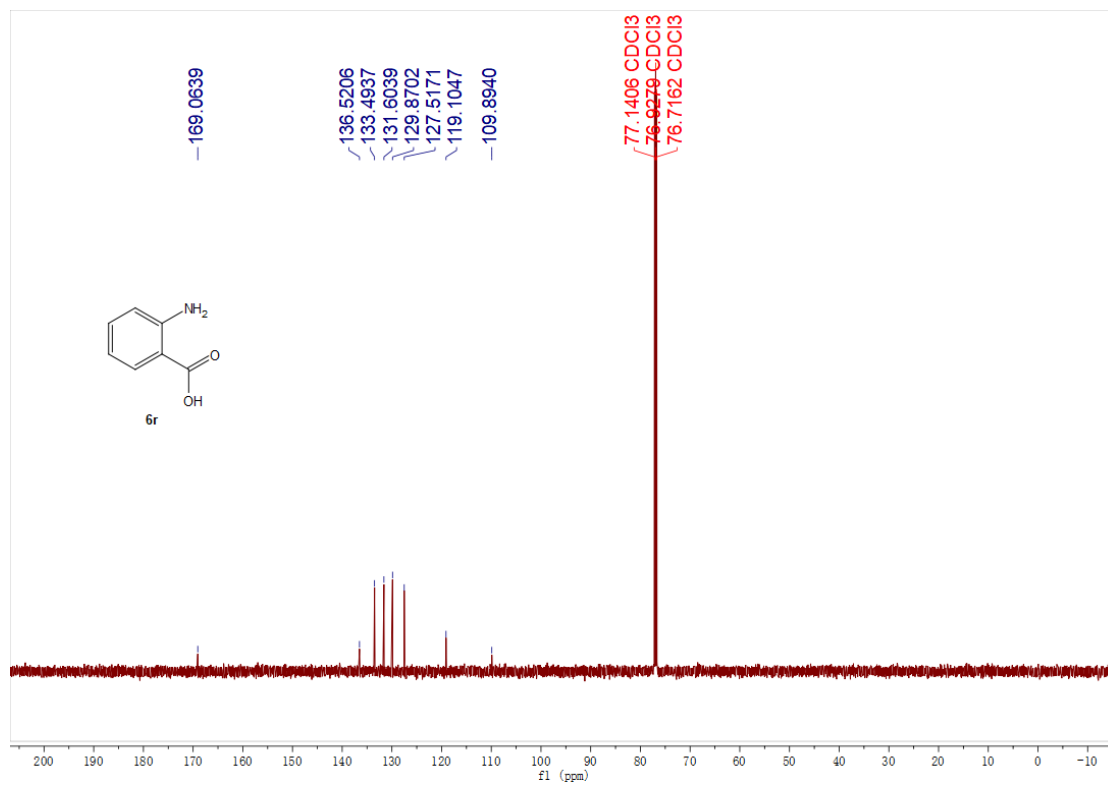

<sup>1</sup>H NMR Spectrum of **6s** (600 MHz, DMSO-d<sub>6</sub>)

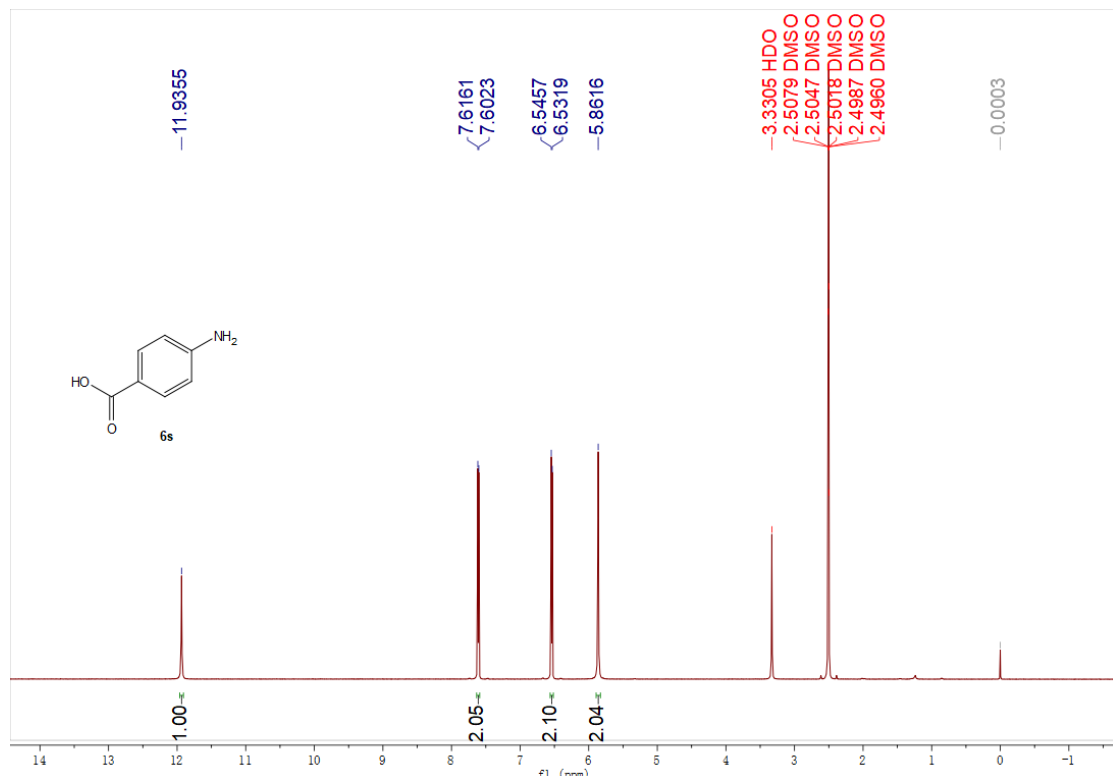

<sup>13</sup>C NMR Spectrum of **6s** (151 MHz, DMSO-d<sub>6</sub>)

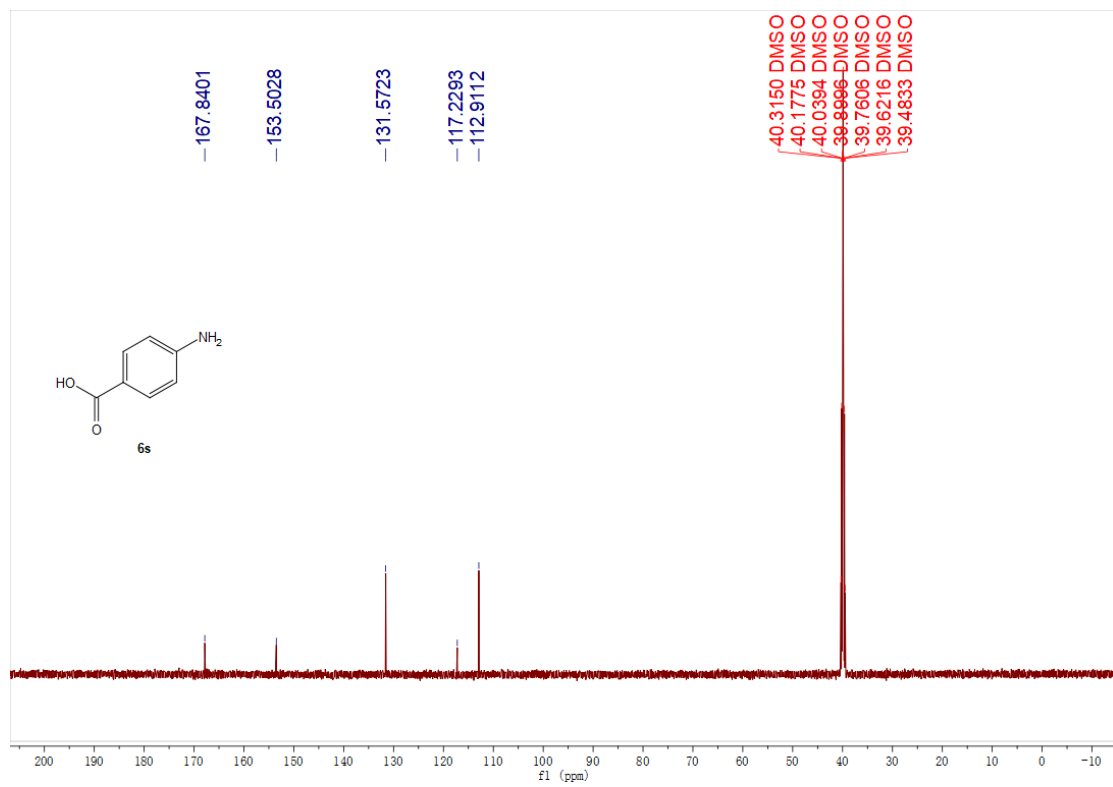

<sup>1</sup>H NMR Spectrum of **6t** (600 MHz, DMSO-d<sub>6</sub>)

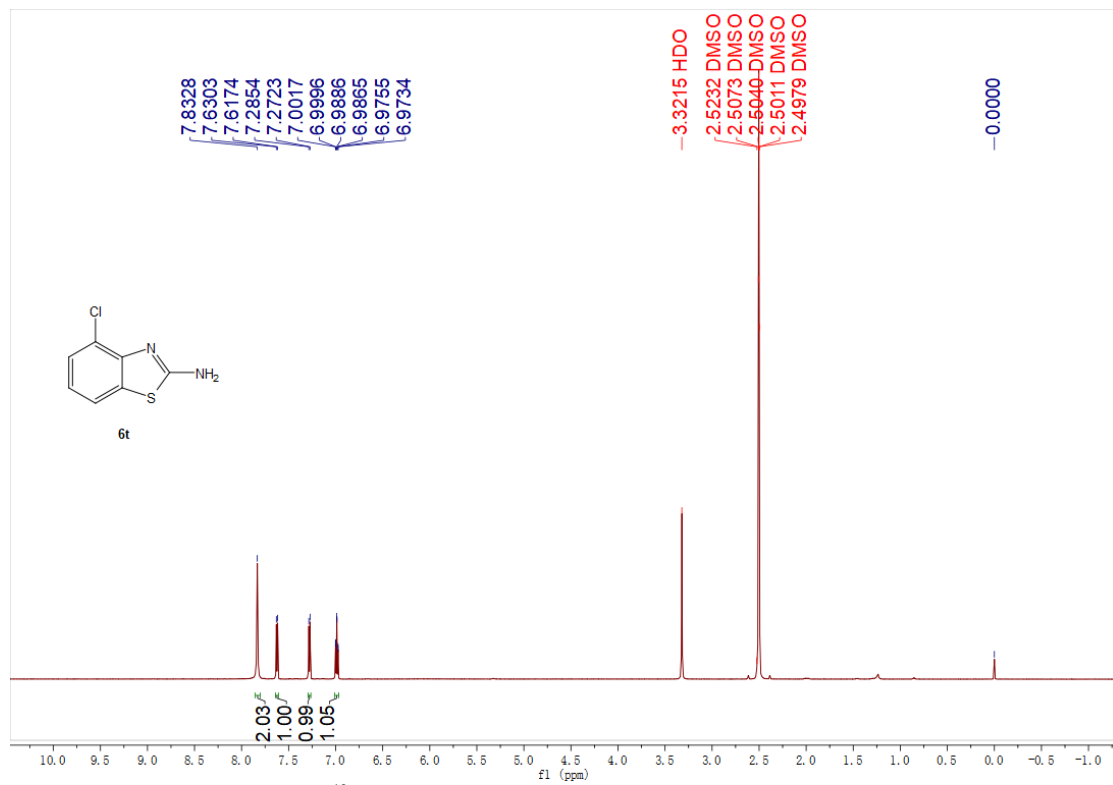

<sup>13</sup>C NMR Spectrum of **6t** (151 MHz, DMSO-d<sub>6</sub>)

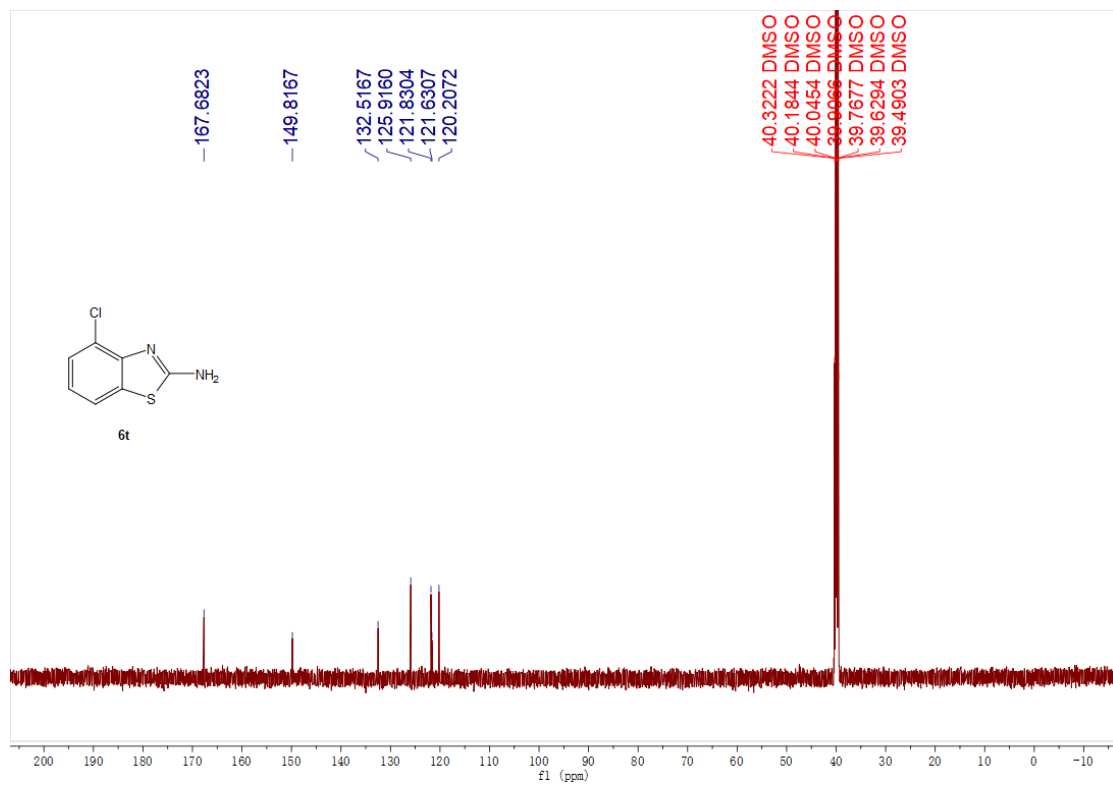

<sup>1</sup>H NMR Spectrum of **6u** (600 MHz, DMSO-d<sub>6</sub>)

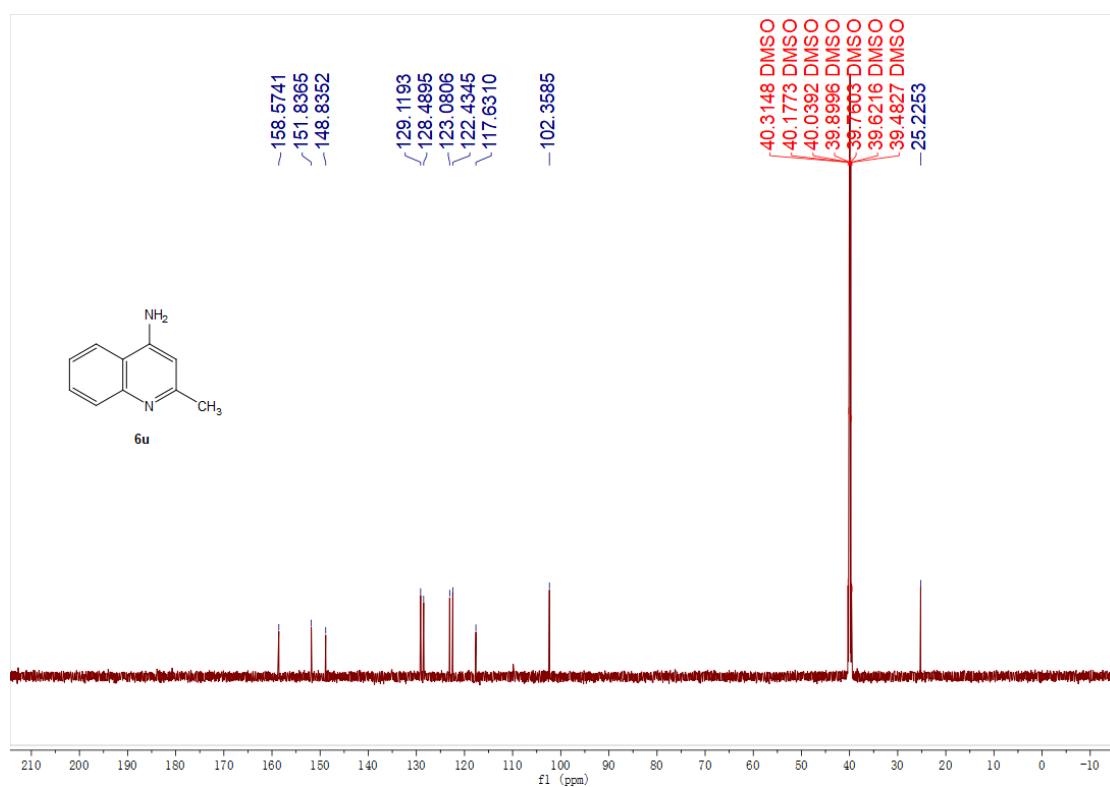

<sup>13</sup>C NMR Spectrum of **6u** (151 MHz, DMSO-d<sub>6</sub>)

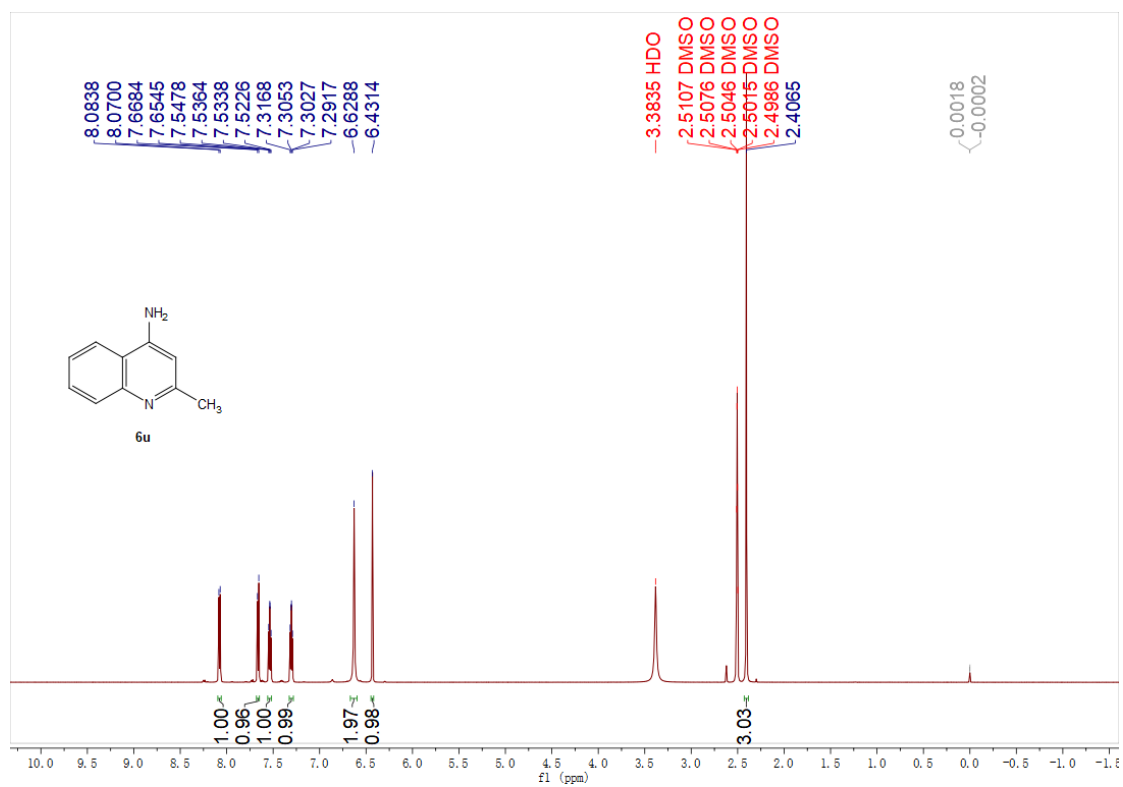

<sup>1</sup>H NMR Spectrum of **6v** (600 MHz, CDCl<sub>3</sub>)

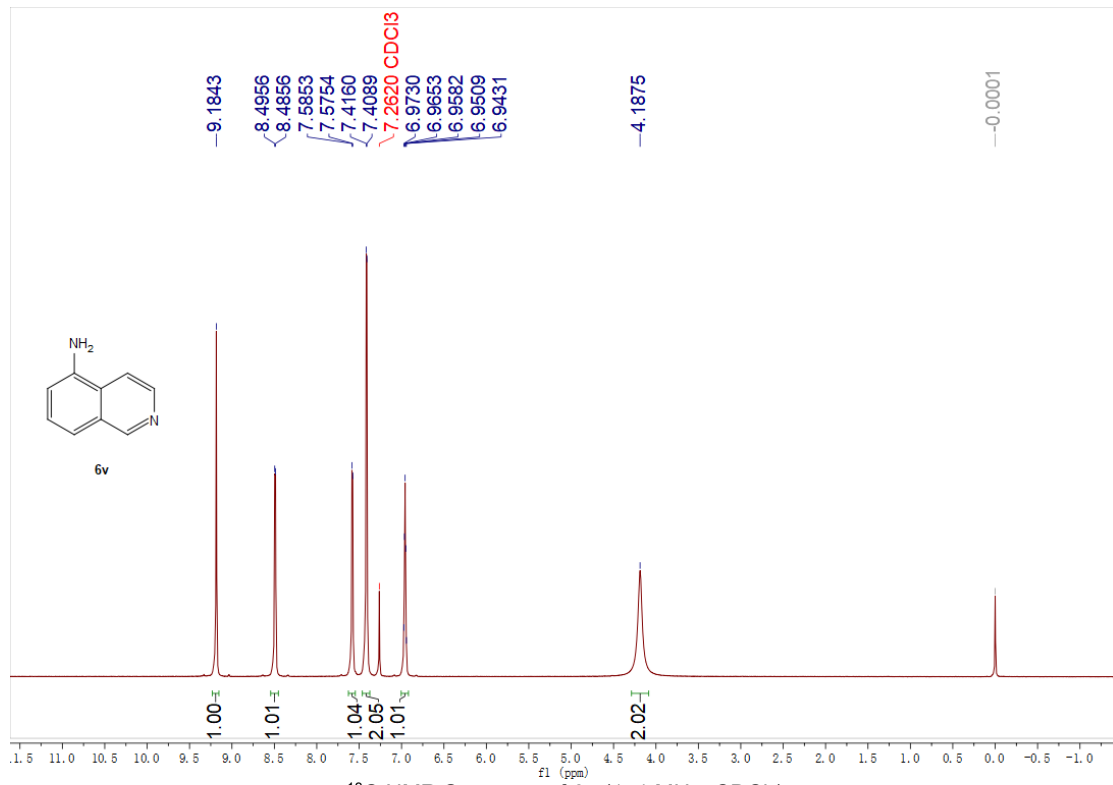

<sup>13</sup>C NMR Spectrum of **6v** (151 MHz, CDCl<sub>3</sub>)

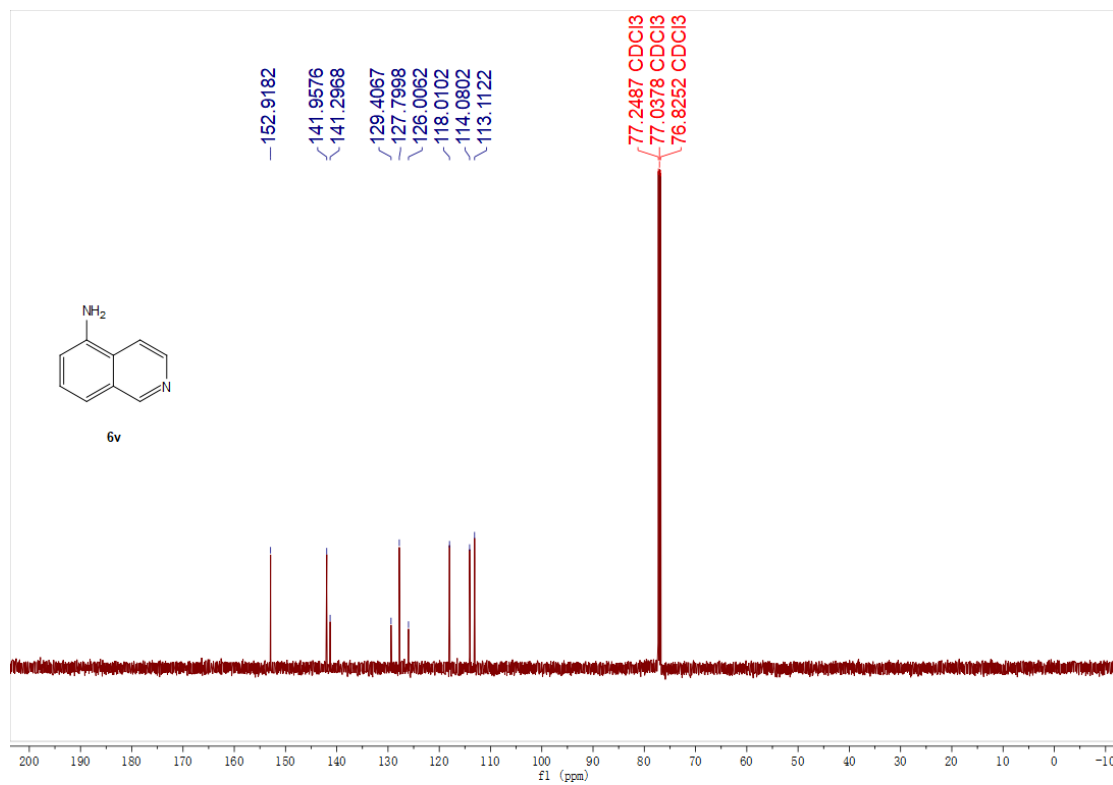

<sup>1</sup>H NMR Spectrum of **6w** (600 MHz, CDCl<sub>3</sub>)

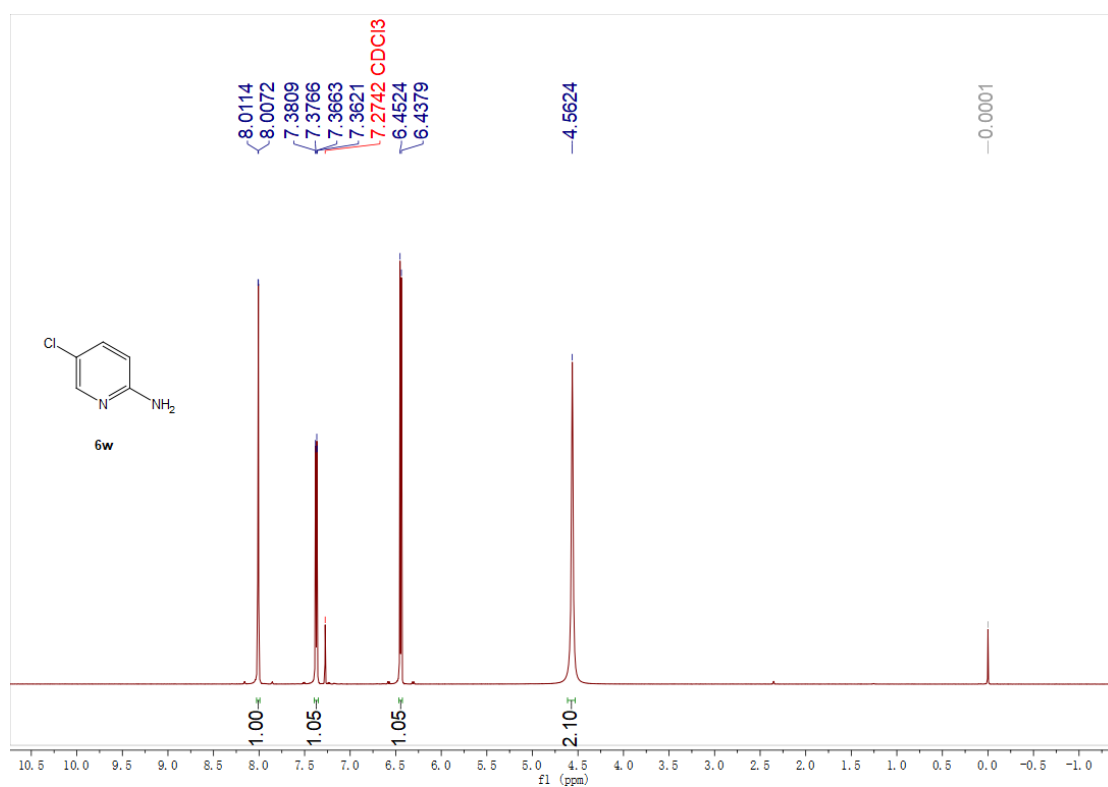

<sup>13</sup>C NMR Spectrum of **6w** (151 MHz, CDCl<sub>3</sub>)

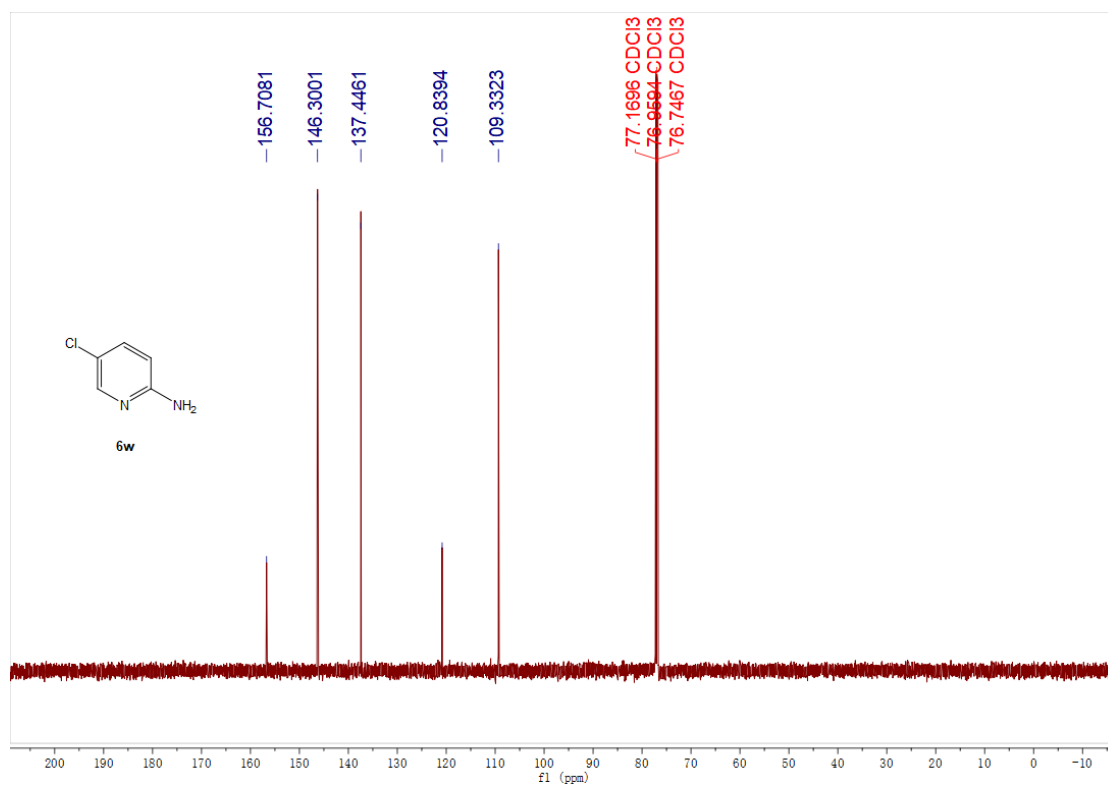

<sup>1</sup>H NMR Spectrum of **6x** (600 MHz, CDCl<sub>3</sub>)

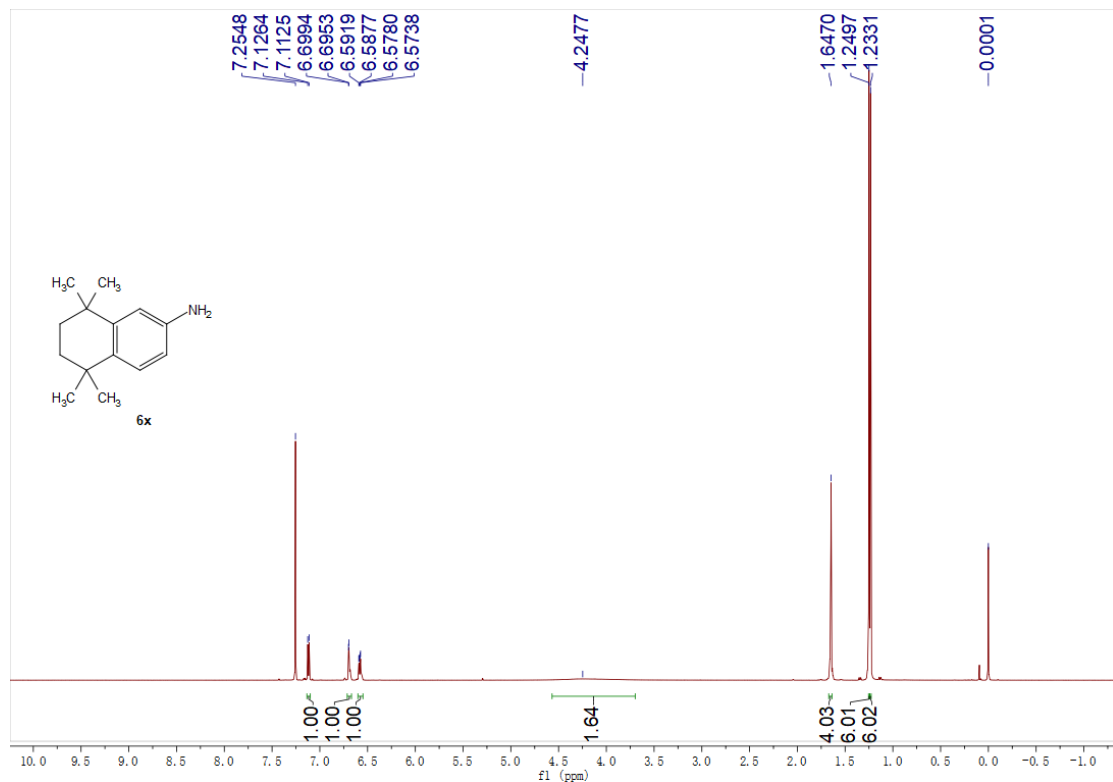

<sup>13</sup>C NMR Spectrum of **6x** (151 MHz, CDCl<sub>3</sub>)

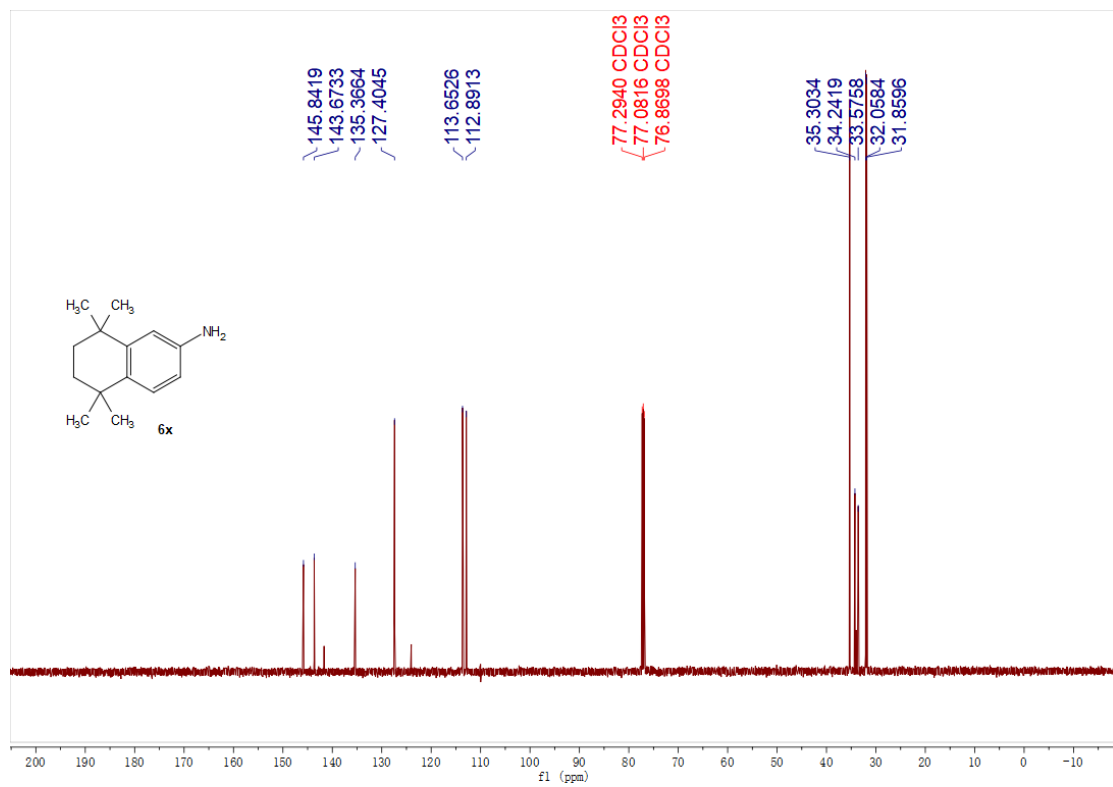

<sup>1</sup>H NMR Spectrum of **8a** (400 MHz, CDCl<sub>3</sub>)

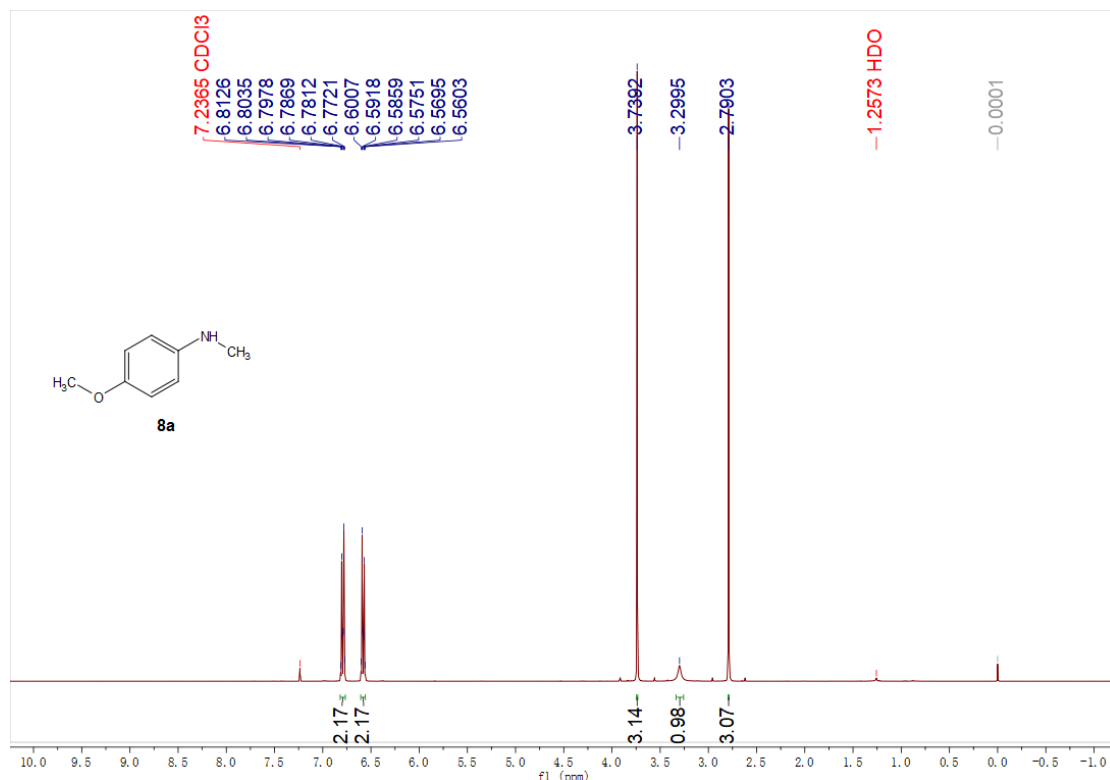

<sup>13</sup>C NMR Spectrum of **8a** (101 MHz, CDCl<sub>3</sub>)

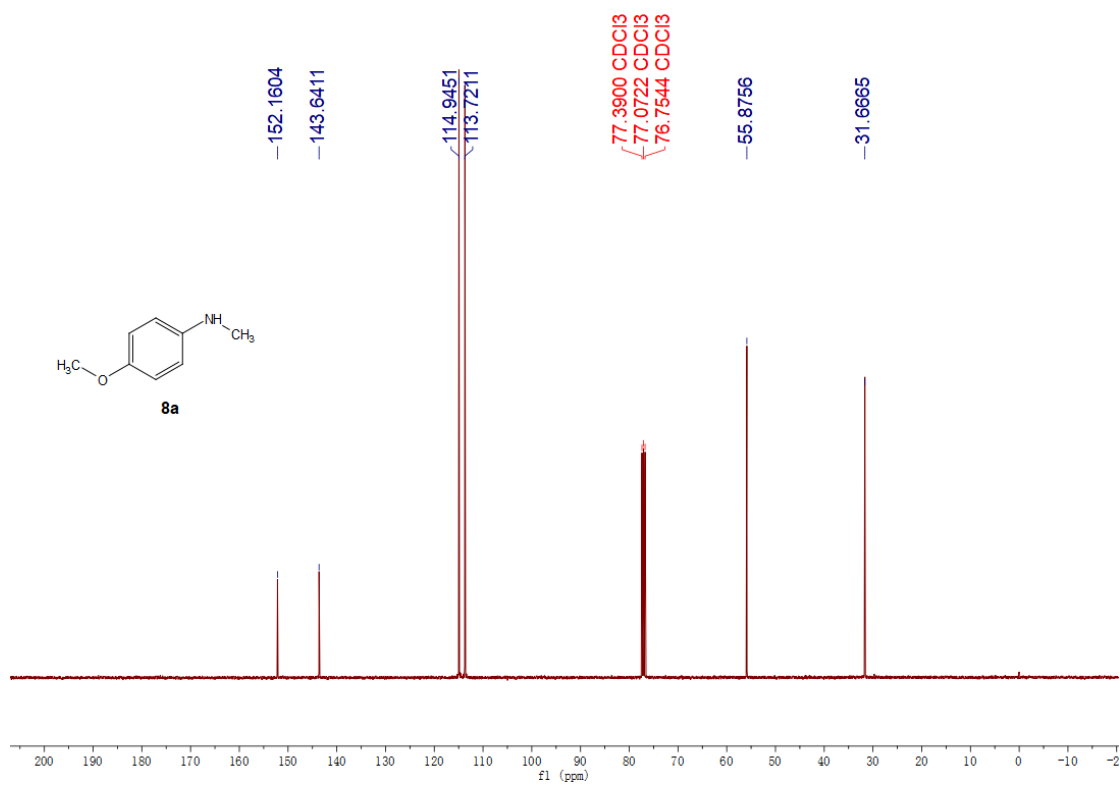



<sup>1</sup>H NMR Spectrum of **8b** (400 MHz, CDCl<sub>3</sub>)

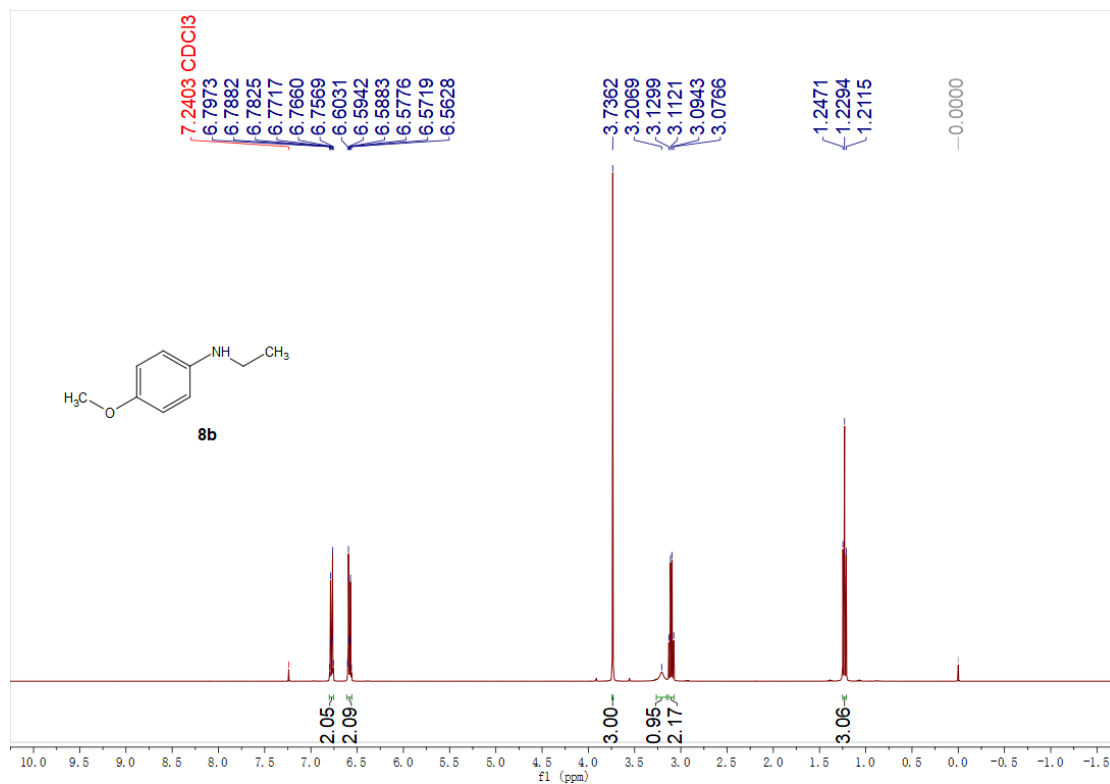

<sup>13</sup>C NMR Spectrum of **8b** (101 MHz, CDCl<sub>3</sub>)

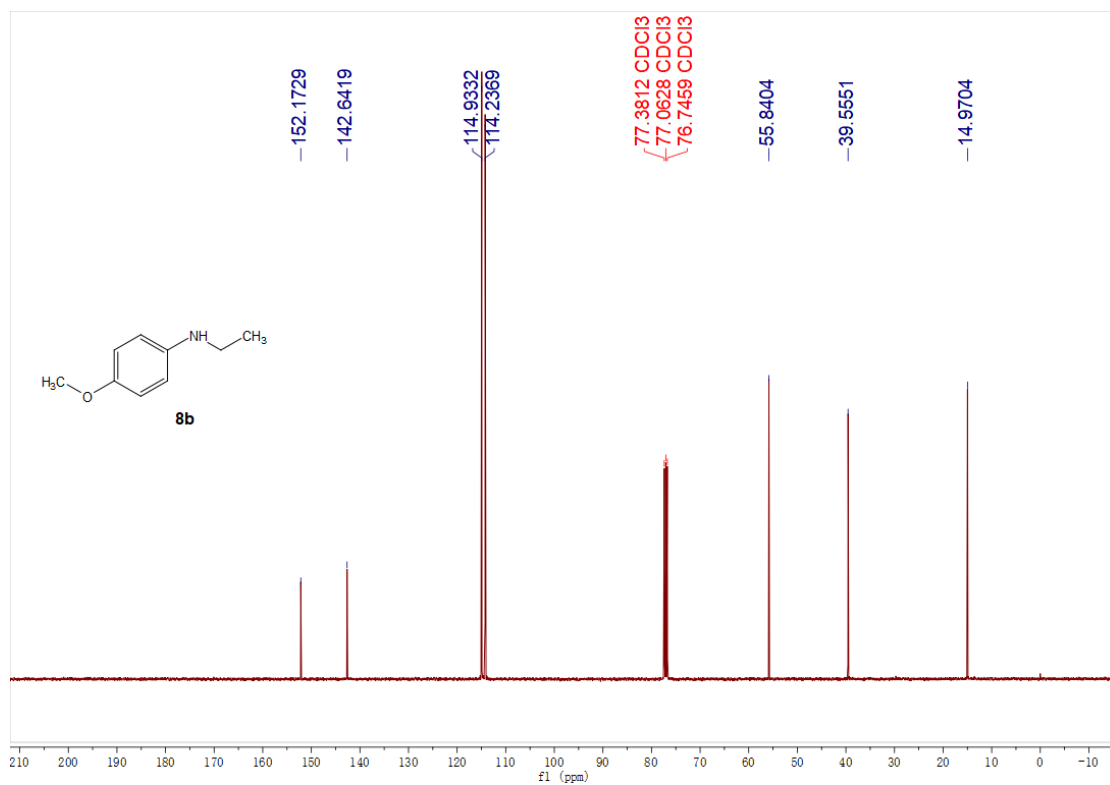

<sup>1</sup>H NMR Spectrum of **8c** (400 MHz, CDCl<sub>3</sub>)

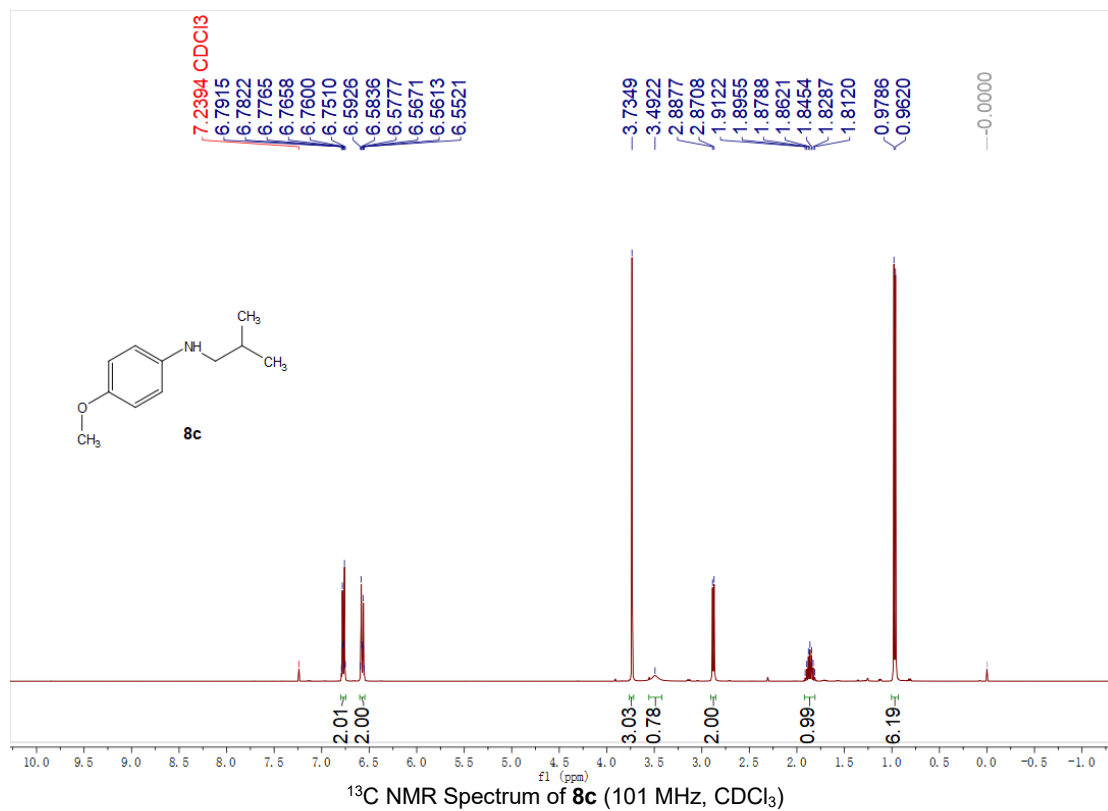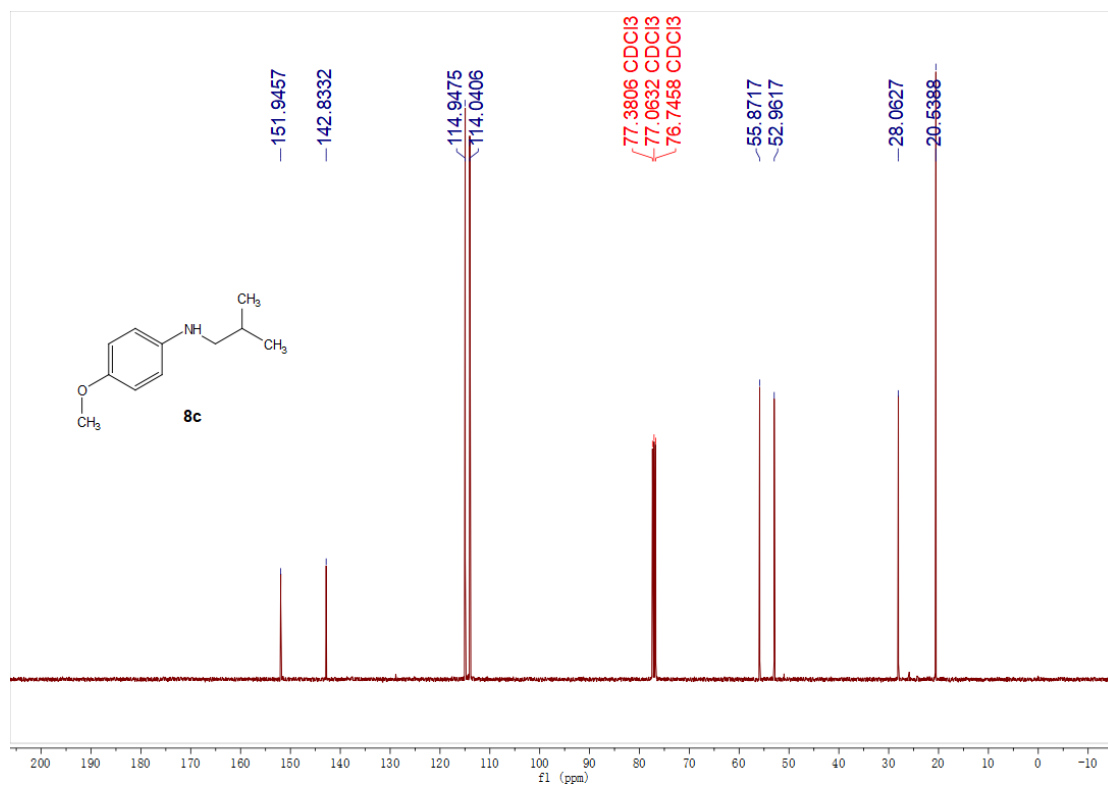

<sup>1</sup>H NMR Spectrum of **8d** (400 MHz, CDCl<sub>3</sub>)

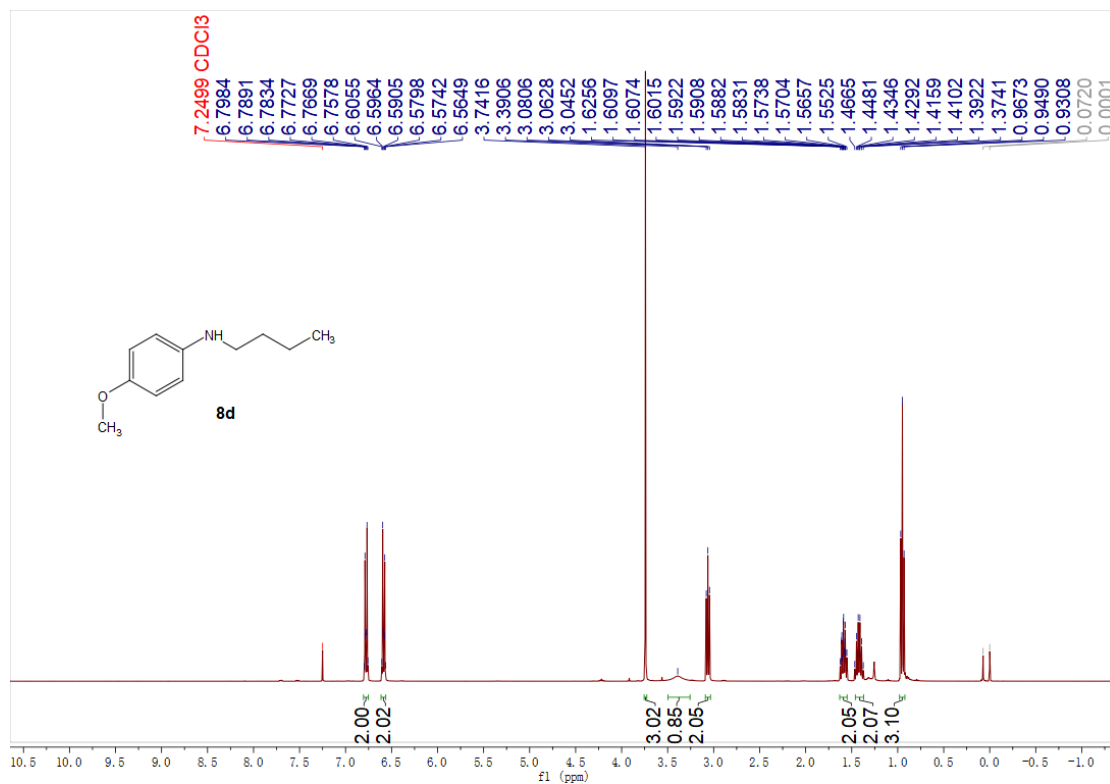

<sup>13</sup>C NMR Spectrum of **8d** (101 MHz, CDCl<sub>3</sub>)

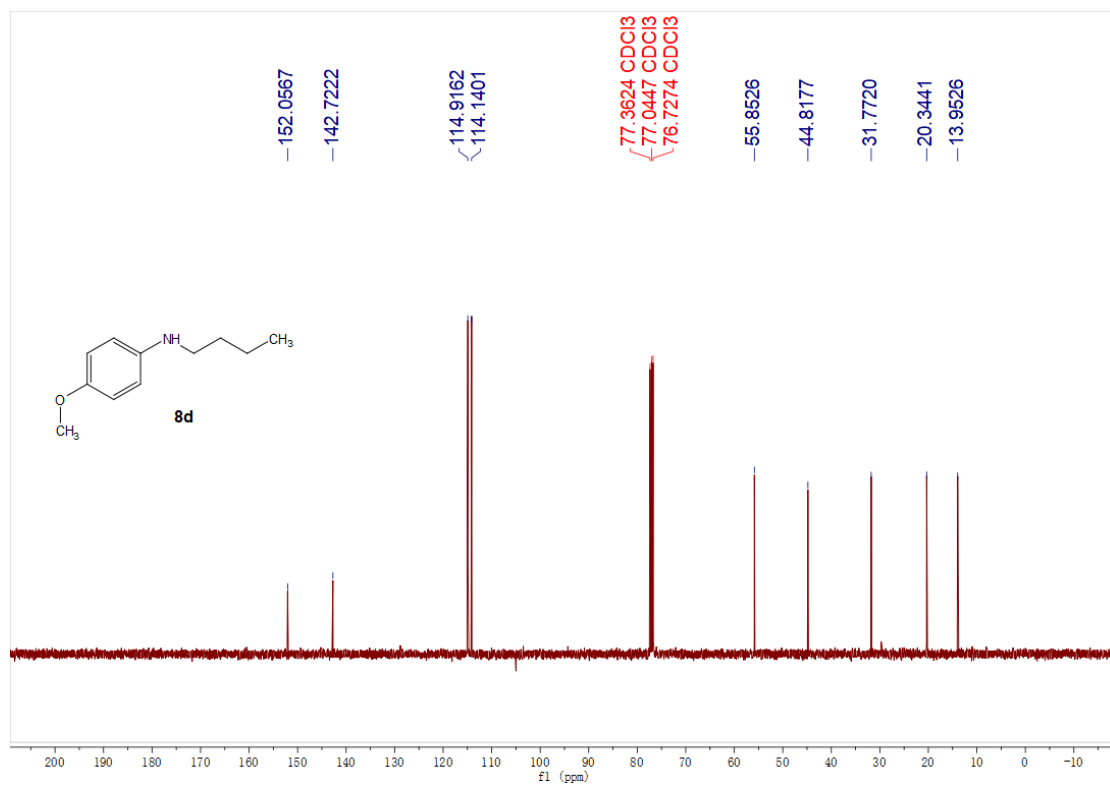

<sup>1</sup>H NMR Spectrum of **8e** (400 MHz, CDCl<sub>3</sub>)

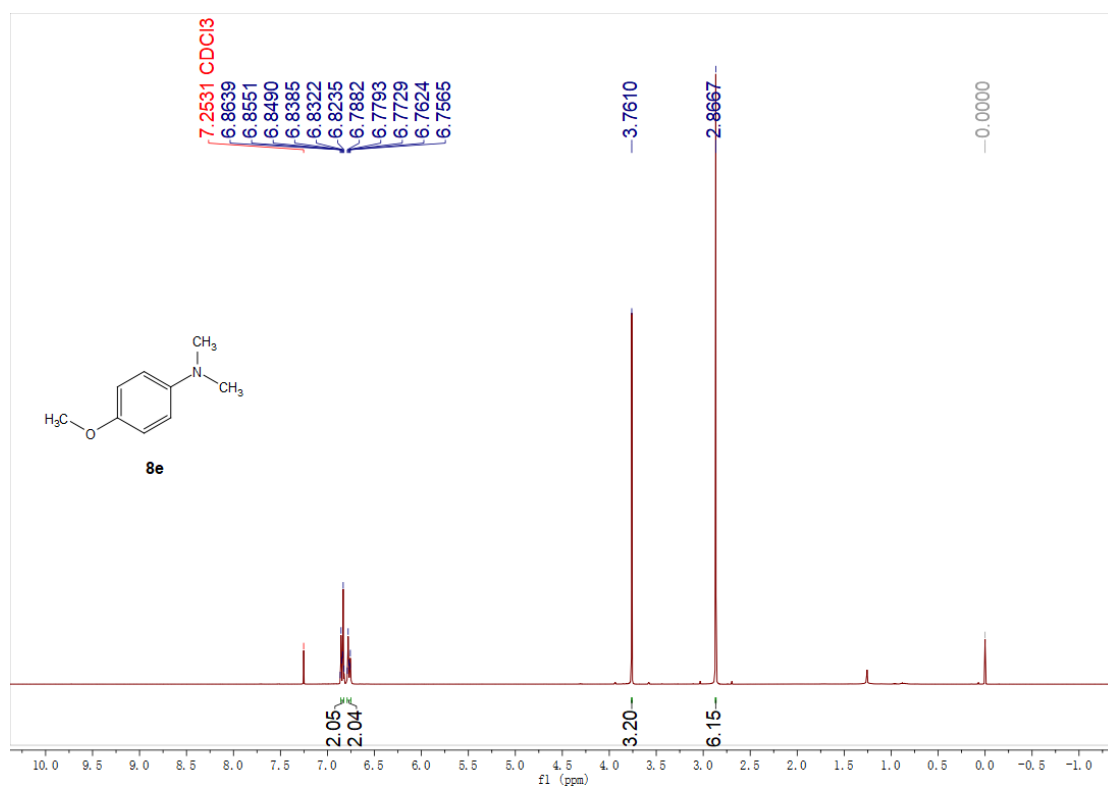

<sup>13</sup>C NMR Spectrum of **8e** (101 MHz, CDCl<sub>3</sub>)

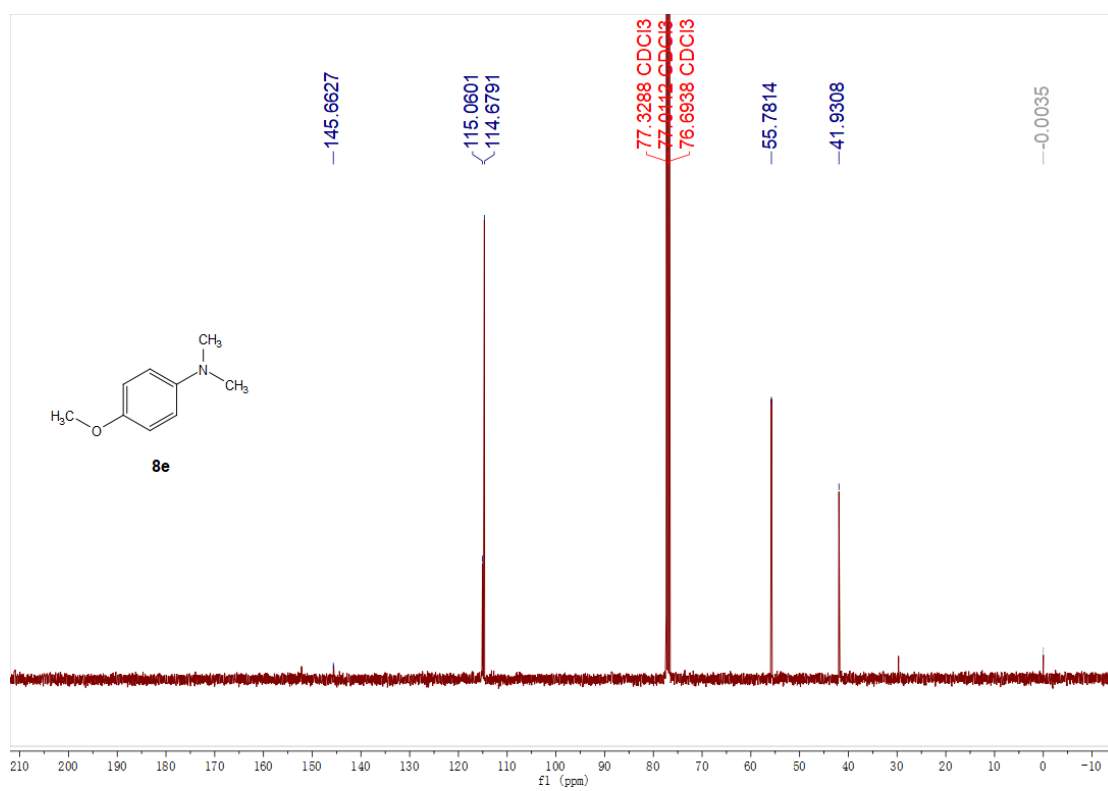

<sup>1</sup>H NMR Spectrum of **8f** (400 MHz, CDCl<sub>3</sub>)

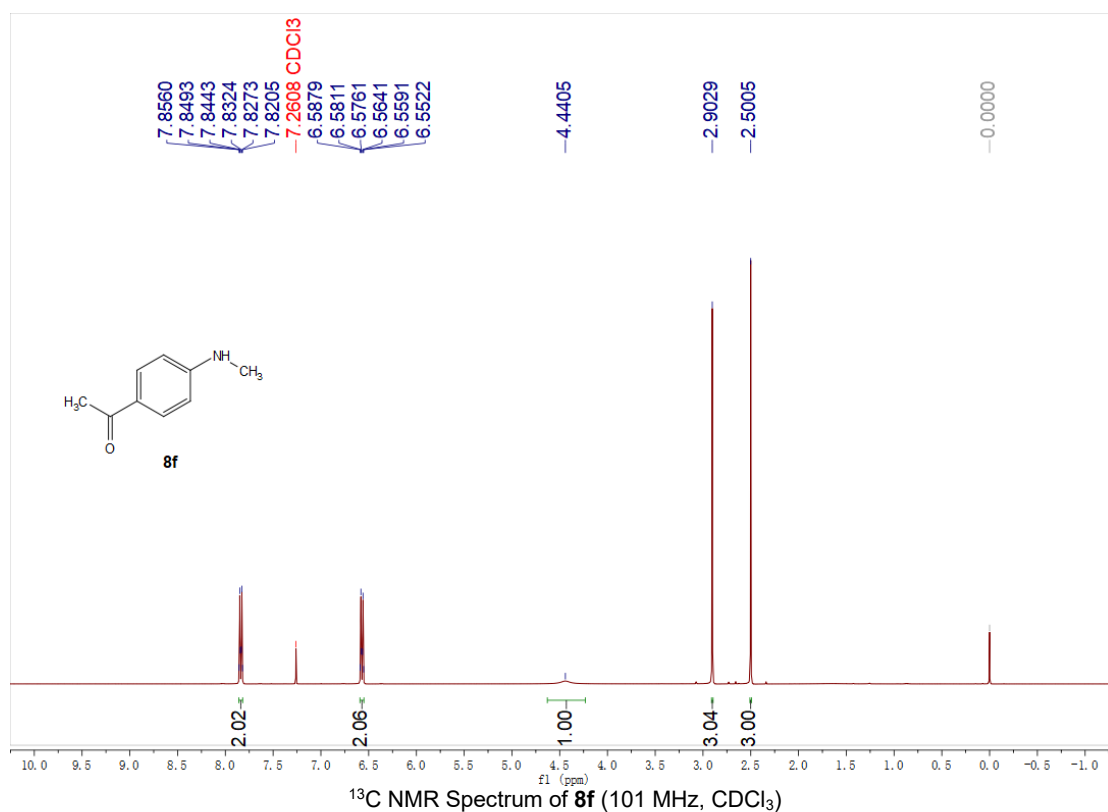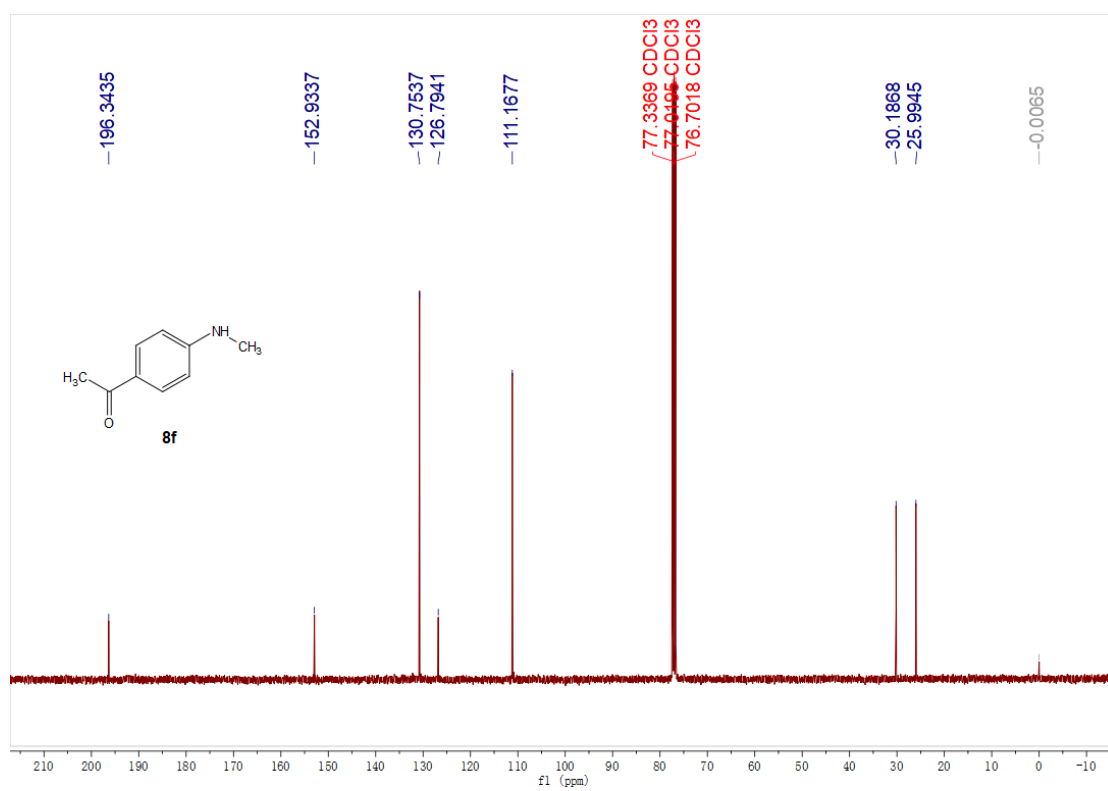

<sup>1</sup>H NMR Spectrum of **8g** (600 MHz, CDCl<sub>3</sub>)

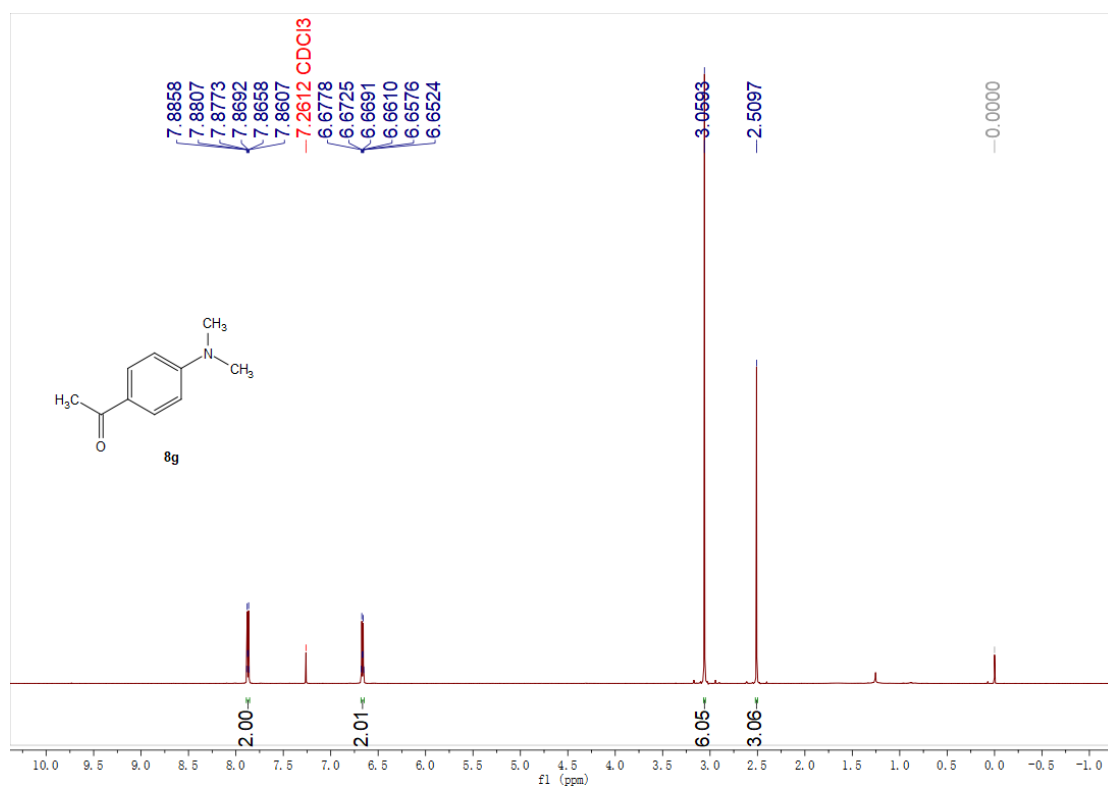

<sup>13</sup>C NMR Spectrum of **8g** (151 MHz, CDCl<sub>3</sub>)

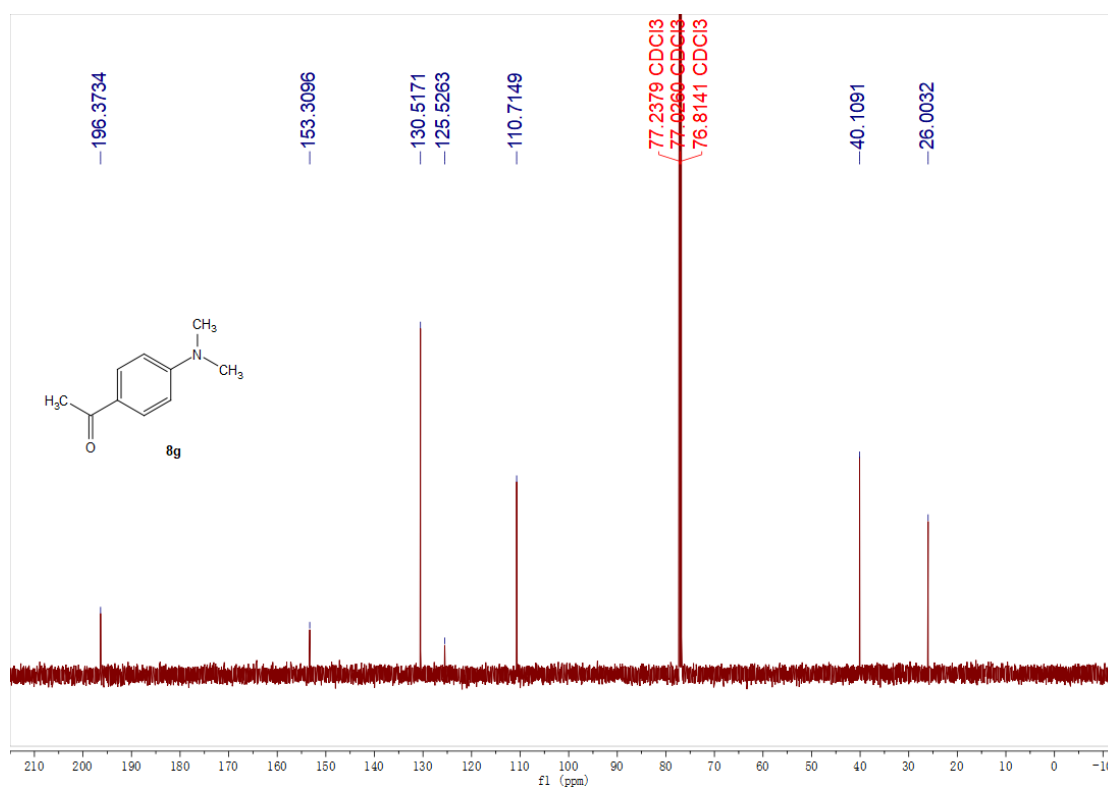

<sup>1</sup>H NMR Spectrum of **8h** (600 MHz, CDCl<sub>3</sub>)

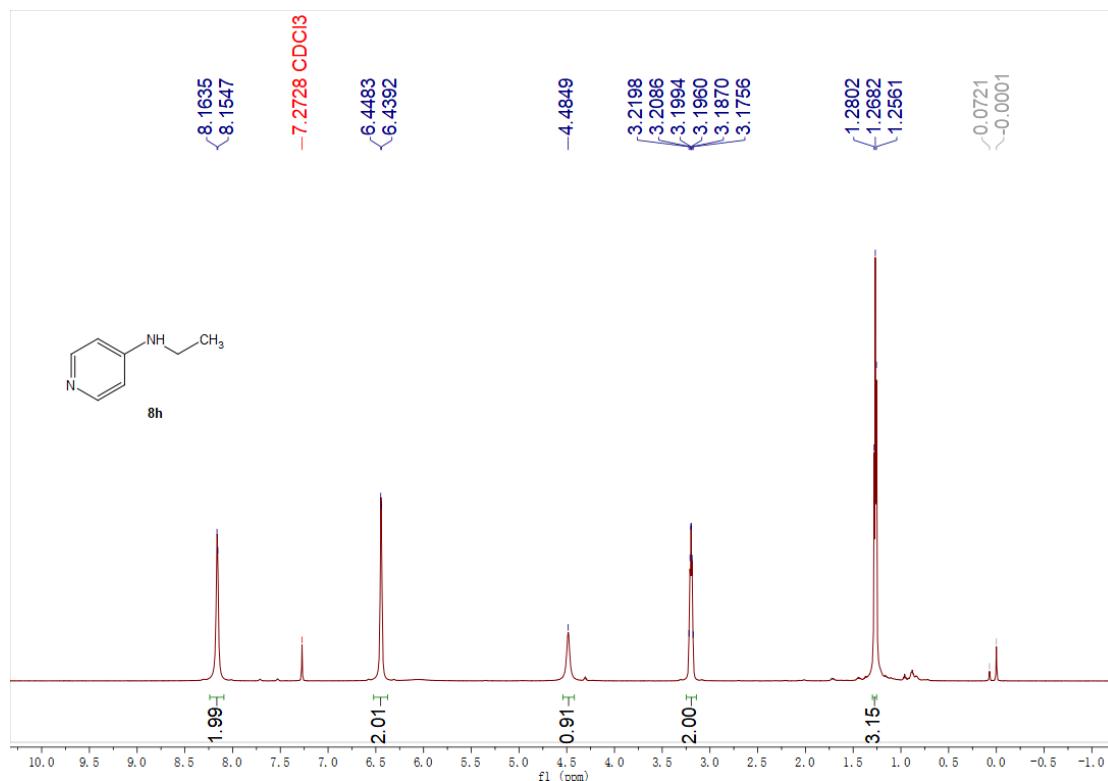

<sup>13</sup>C NMR Spectrum of **8h** (151 MHz, CDCl<sub>3</sub>)

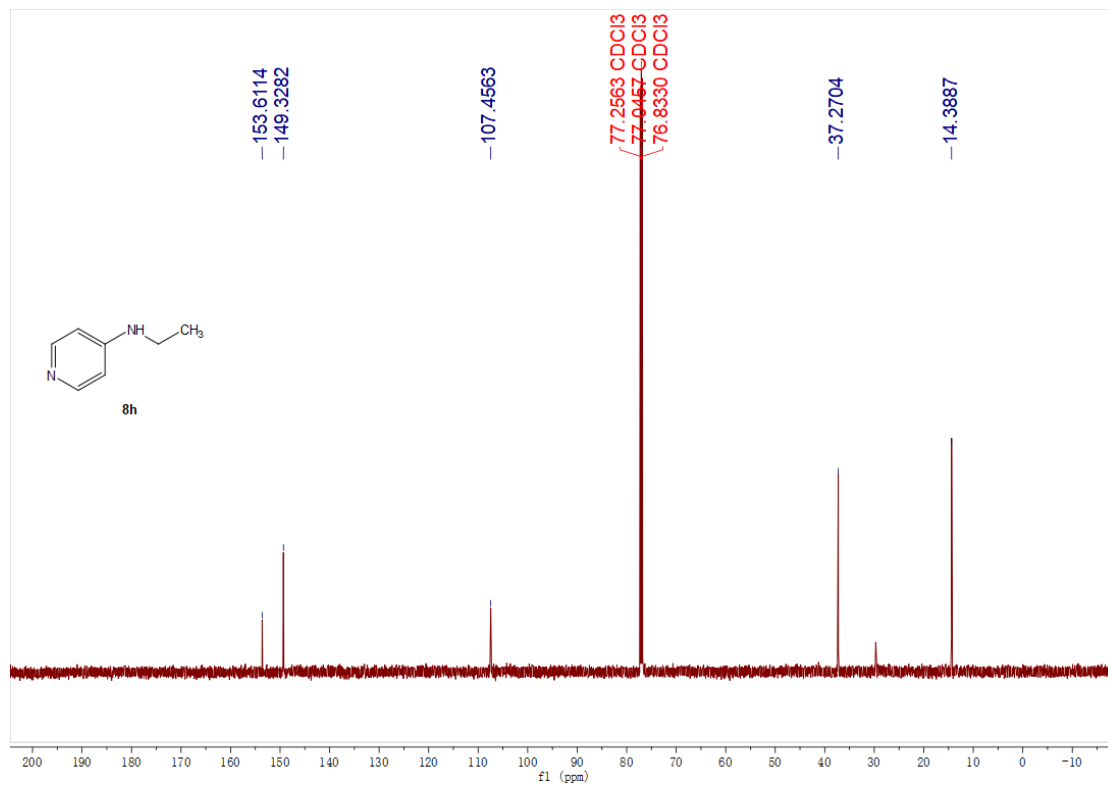

<sup>1</sup>H NMR Spectrum of **8i** (600 MHz, CDCl<sub>3</sub>)

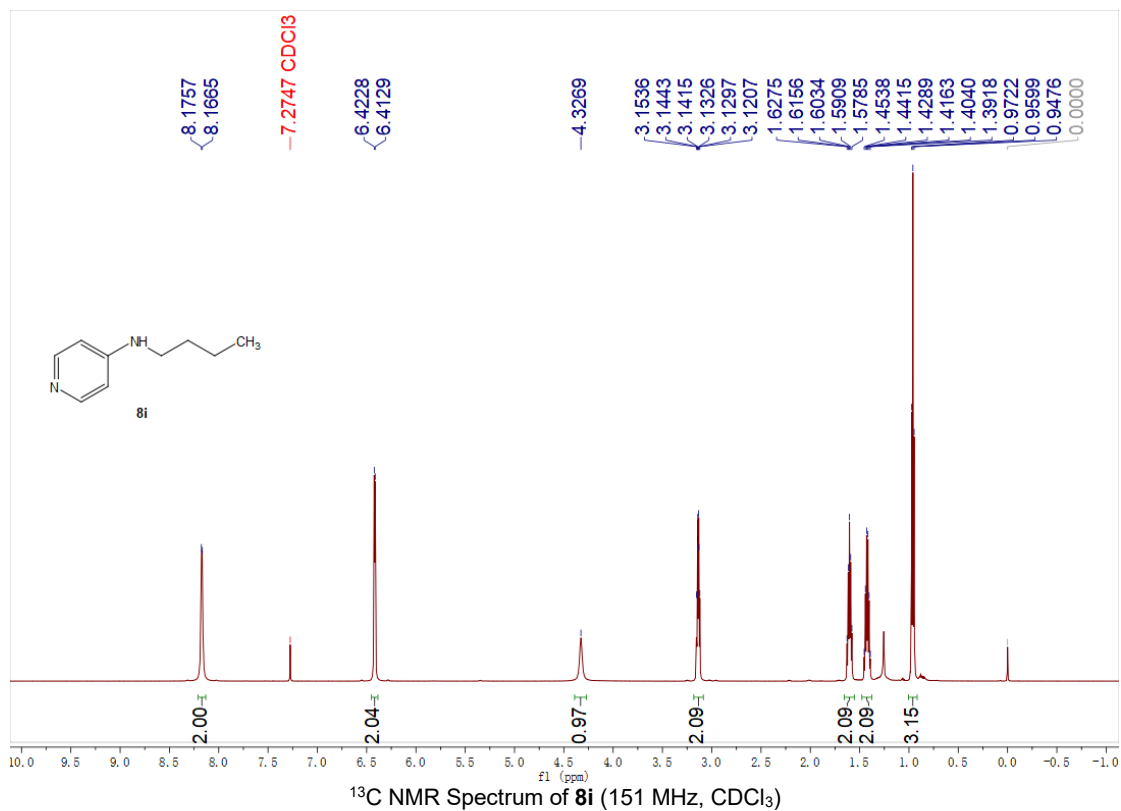

<sup>13</sup>C NMR Spectrum of **8i** (151 MHz, CDCl<sub>3</sub>)

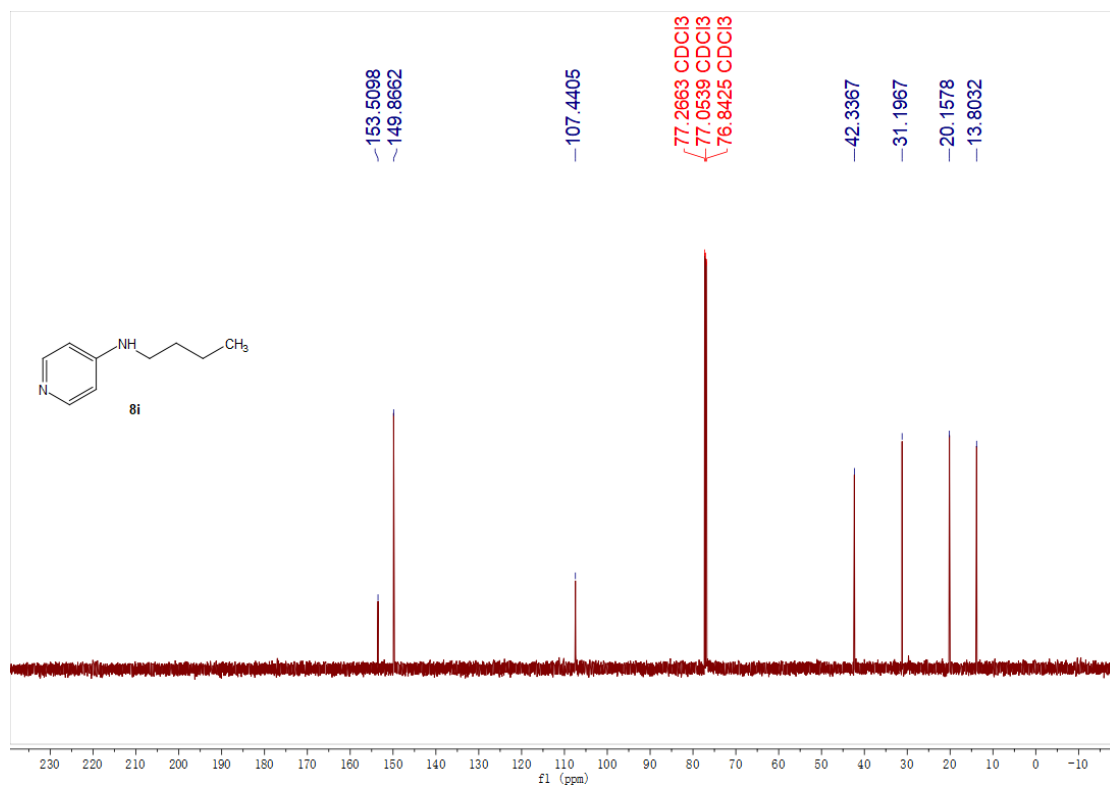



<sup>1</sup>H NMR Spectrum of **8j** (400 MHz, CDCl<sub>3</sub>)

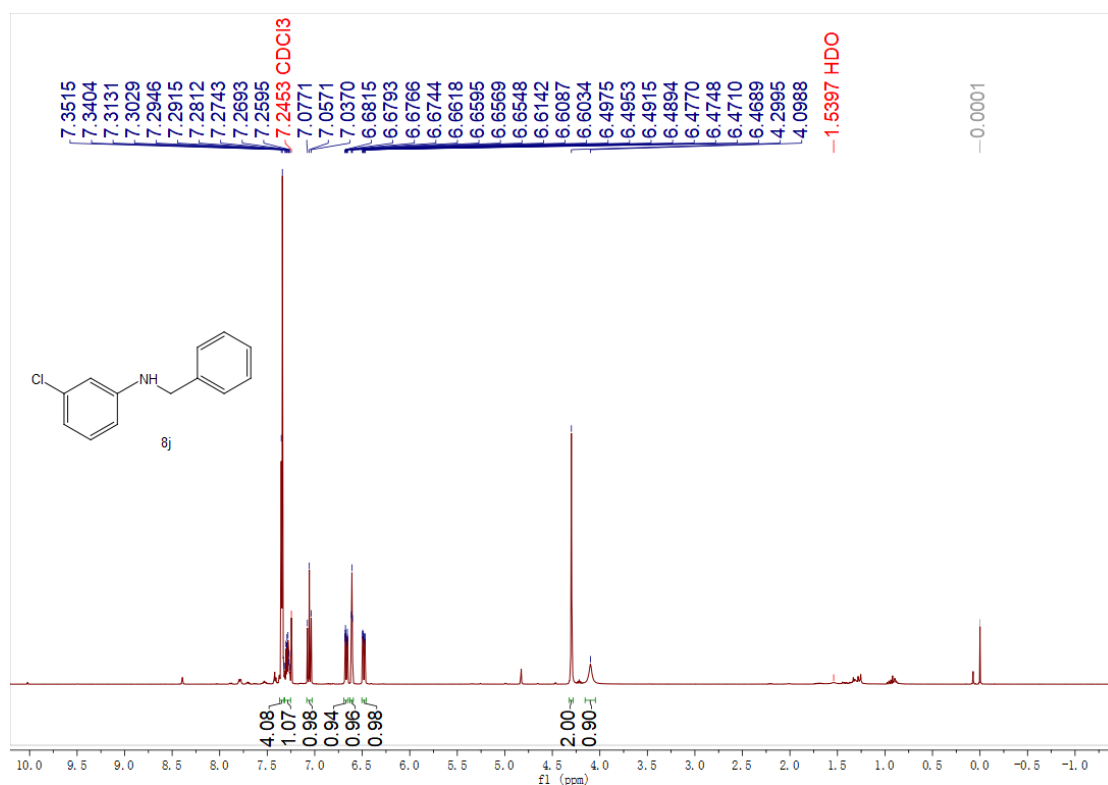

<sup>13</sup>C NMR Spectrum of **8j** (101 MHz, CDCl<sub>3</sub>)

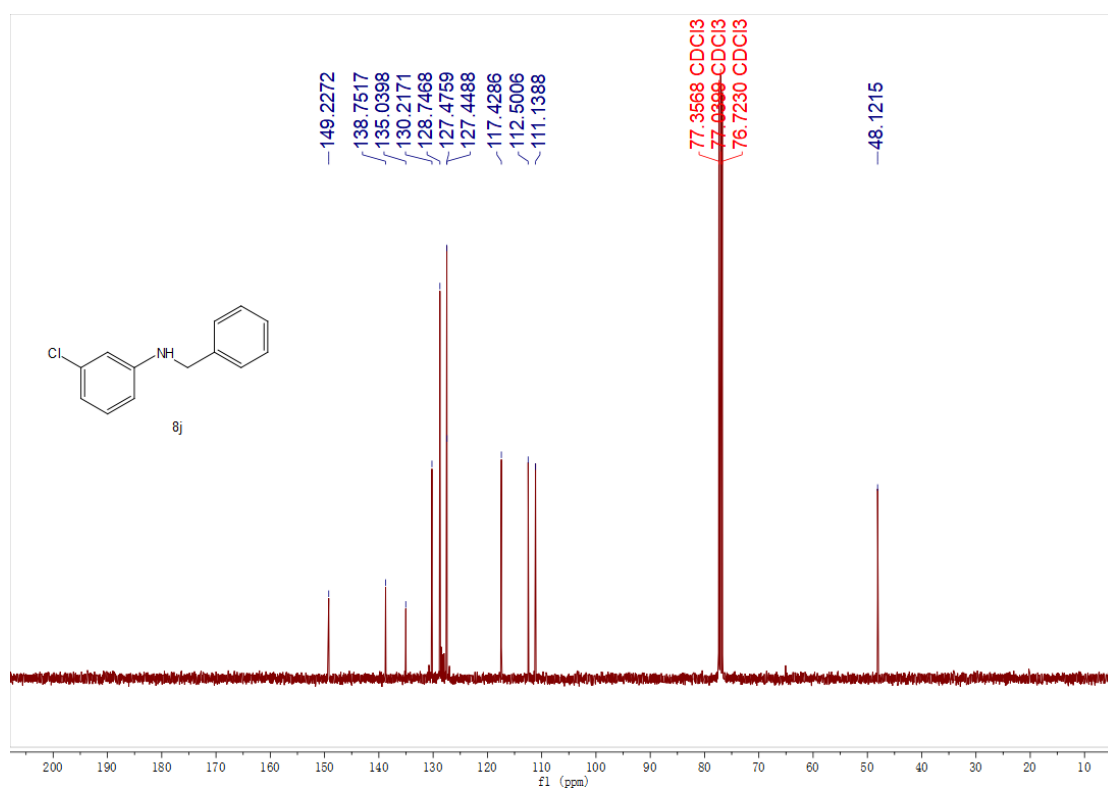

<sup>1</sup>H NMR Spectrum of **8k** (400 MHz, CDCl<sub>3</sub>)

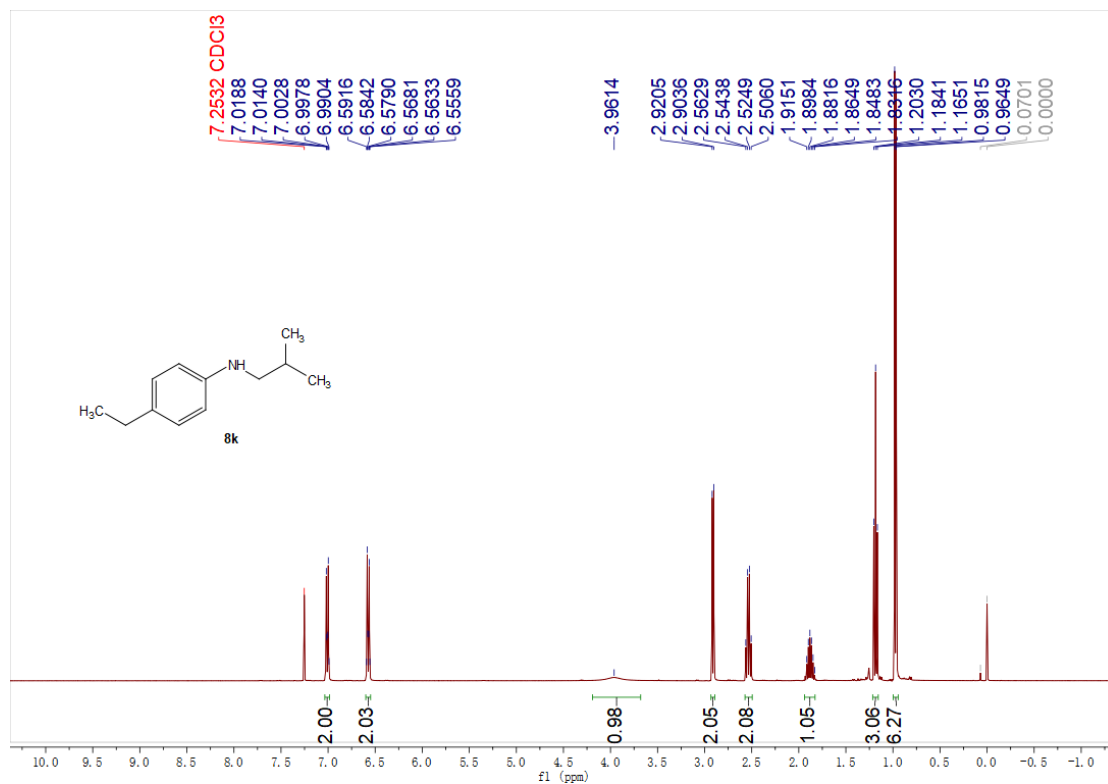

<sup>13</sup>C NMR Spectrum of **8k** (101 MHz, CDCl<sub>3</sub>)

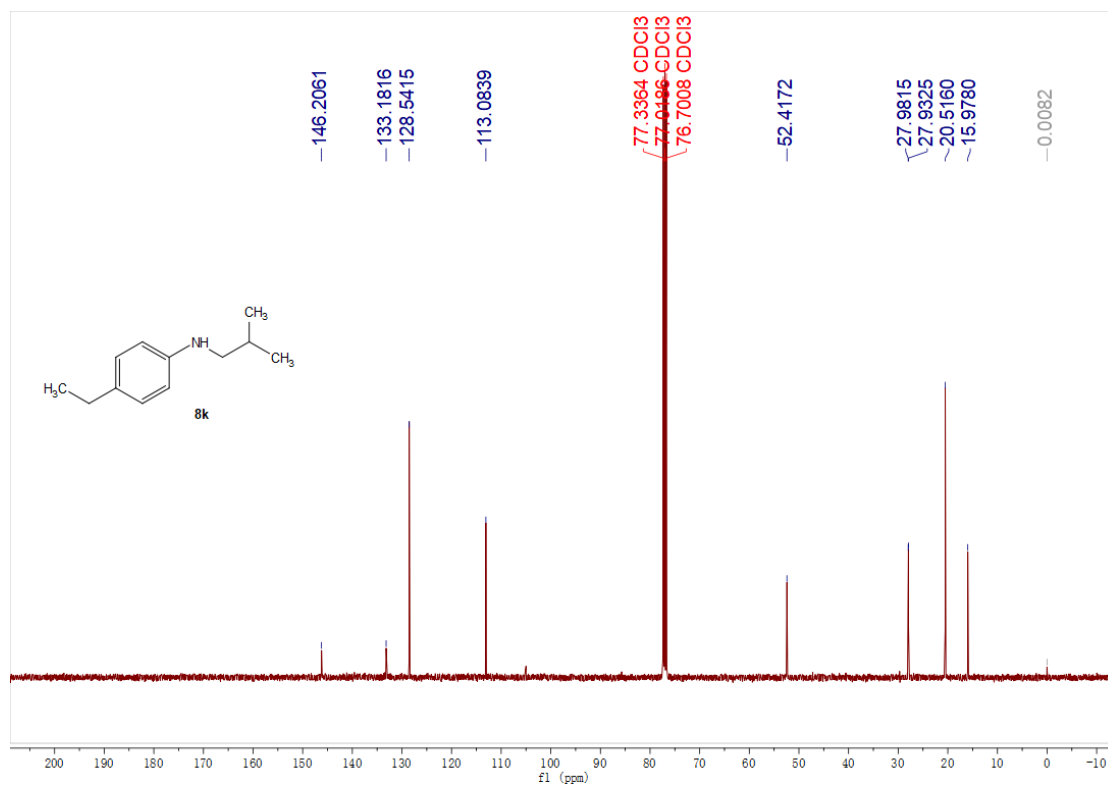

Supplement: d2nj03440a1.pdf [file d2nj03440a1.pdf]
